# Supplementary material for: Cohort study evaluating the burden of wounds to the UK’s National Health Service in 2017/2018: update from 2012/2013
Source: PubMed Central journal article supplement — BMJ Open. 2020 Dec 22;10(12):e045253. doi: 10.1136/bmjopen-2020-045253 (PMC7757484; doi:10.1136/bmjopen-2020-045253), 2020-12-22
Supplement: bmjopen-2020-045253.draft_revisions.pdf [file bmjopen-2020-045253.draft_revisions.pdf]

# BMJ Open

BMJ Open is committed to open peer review. As part of this commitment we make the peer review history of every article we publish publicly available.

When an article is published we post the peer reviewers' comments and the authors' responses online. We also post the versions of the paper that were used during peer review. These are the versions that the peer review comments apply to.

The versions of the paper that follow are the versions that were submitted during the peer review process. They are not the versions of record or the final published versions. They should not be cited or distributed as the published version of this manuscript.

BMJ Open is an open access journal and the full, final, typeset and author-corrected version of record of the manuscript is available on our site with no access controls, subscription charges or pay-per-view fees (<http://bmjopen.bmj.com>).

If you have any questions on BMJ Open's open peer review process please email [info.bmjopen@bmj.com](mailto:info.bmjopen@bmj.com)

# BMJ Open

## THE BURDEN OF WOUNDS TO THE UK'S NATIONAL HEALTH SERVICE IN 2017/18: UPDATE FROM THE 2012/13 STUDY

|                               |                                                                                                                                                                                             |
|-------------------------------|---------------------------------------------------------------------------------------------------------------------------------------------------------------------------------------------|
| Journal:                      | <i>BMJ Open</i>                                                                                                                                                                             |
| Manuscript ID                 | bmjopen-2020-045253                                                                                                                                                                         |
| Article Type:                 | Original research                                                                                                                                                                           |
| Date Submitted by the Author: | 28-Sep-2020                                                                                                                                                                                 |
| Complete List of Authors:     | Guest, Julian F.; Catalyst Health Economics Consultants Ltd<br>Fuller, Graham; Catalyst Health Economics Consultants Ltd<br>Vowden, Peter; Bradford Teaching Hospitals NHS Foundation Trust |
| Keywords:                     | HEALTH ECONOMICS, HEALTH SERVICES ADMINISTRATION & MANAGEMENT, WOUND MANAGEMENT                                                                                                             |
|                               |                                                                                                                                                                                             |

SCHOLARONE™  
Manuscripts

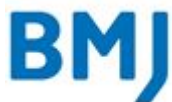

I, the Submitting Author has the right to grant and does grant on behalf of all authors of the Work (as defined in the below author licence), an exclusive licence and/or a non-exclusive licence for contributions from authors who are: i) UK Crown employees; ii) where BMJ has agreed a CC-BY licence shall apply, and/or iii) in accordance with the terms applicable for US Federal Government officers or employees acting as part of their official duties; on a worldwide, perpetual, irrevocable, royalty-free basis to BMJ Publishing Group Ltd ("BMJ") its licensees and where the relevant Journal is co-owned by BMJ to the co-owners of the Journal, to publish the Work in this journal and any other BMJ products and to exploit all rights, as set out in our [licence](#).

The Submitting Author accepts and understands that any supply made under these terms is made by BMJ to the Submitting Author unless you are acting as an employee on behalf of your employer or a postgraduate student of an affiliated institution which is paying any applicable article publishing charge ("APC") for Open Access articles. Where the Submitting Author wishes to make the Work available on an Open Access basis (and intends to pay the relevant APC), the terms of reuse of such Open Access shall be governed by a Creative Commons licence – details of these licences and which [Creative Commons](#) licence will apply to this Work are set out in our licence referred to above.

Other than as permitted in any relevant BMJ Author's Self Archiving Policies, I confirm this Work has not been accepted for publication elsewhere, is not being considered for publication elsewhere and does not duplicate material already published. I confirm all authors consent to publication of this Work and authorise the granting of this licence.

**ORIGINAL ARTICLE****THE BURDEN OF WOUNDS TO THE UK'S NATIONAL HEALTH SERVICE  
IN 2017/18: UPDATE FROM THE 2012/13 STUDY****Julian F Guest<sup>1</sup>, Graham W Fuller<sup>1</sup>, Peter Vowden<sup>2</sup>****<sup>1</sup>Catalyst Consultants, Poole, UK; <sup>2</sup>Bradford Teaching Hospitals NHS  
Foundation Trust, Bradford, UK.****Correspondence to:**

Professor Julian F Guest

Catalyst Consultants

PO Box 9429

Poole BH4 0HA

UK

Tel: +44 (0) 1923 450045

E-mail: [julian.guest@catalyst-health.com](mailto:julian.guest@catalyst-health.com)**Running title:** Health economic impact of wounds in the UK**Word count:** 5,713 excluding Abstract and References**Number of tables and figures:** 10 tables and 0 figures

## ABSTRACT

**Objective:** To evaluate the prevalence of wounds managed by the UK's National Health Service (NHS) in 2017/18 and associated health outcomes, resource use and corresponding costs.

**Methods:** This was a retrospective cohort analysis of the electronic records of a randomly selected cohort of patients from the THIN database who had a wound in 2017/18.

**Results:** There were an estimated 3.8 million patients with a wound managed by the NHS in 2017/18, of which 70% healed in the study year; 89% and 49% of acute and chronic wounds healed, respectively. An estimated 59% of chronic wounds healed if there was no evidence of infection compared to 45% if there was a definite or suspected infection. Healing rate of acute wounds was unaffected by the presence of infection. Smoking status appeared to only affect the healing rate of chronic wounds. Annual levels of resource use attributable to wound management included 54.4 million district/community nurse visits, 53.6 million healthcare assistant visits, 28.1 million practice nurse visits, 20.1 million general practitioner (GP) office visits and 6.8 million hospital outpatient visits. The annual NHS cost of wound management was £8.3 billion, of which £2.7 billion and £5.6 billion was associated with managing healed and unhealed wounds, respectively. Eighty one per cent of the total annual NHS cost was incurred in the community and the remainder in secondary care, although this varied according to wound type.

**Conclusion:** The annual prevalence of wounds increased by 71% between 2012/13 and 2017/18. There was a substantial increase in resource use over this period and patient management cost increased by 48% in real terms. There needs to be a structural change within the NHS in order to manage the increasing demand for wound care and improve patient outcomes.

**Keywords:** Burden; cost; ulcers; wounds; UK.

## STRENGTHS AND LIMITATIONS OF THIS STUDY

- This study provides an update to the 2012/13 study to benchmark how the annual prevalence of wounds, health outcomes, resource use and corresponding costs of wound care across both the community and secondary care has changed in the last five years.
- This study was undertaken using real world evidence derived from the anonymised records of a randomised sample of 3,000 patients in The Health Improvement Network (THIN) database (a nationally representative database of clinical practice among >11 million patients registered with general practitioners in the UK).
- The estimates were derived following a systematic analysis of patients' characteristics, wound-related health outcomes and community-based and secondary care resource use pertaining to wound care contained in the patients' electronic records.
- The annual number of 3.8 million wounds in 2017/18 may be an underestimate since some of the patients in our data set may have had multiple wounds, but this is not transparent in the patients' records and it is very difficult to retrospectively extricate resource use for different wounds from the records of a patient with multiple wounds of the same aetiology.
- The analysis does not consider the potential impact of those wounds that remained unhealed beyond the study period, nor the potential impact of managing patients with wounds being cared for in nursing homes.

1  
2  
3 **FUNDING**  
4  
5

6 This study was funded by J.F.G., the lead author and a donation from Essity, Hull, UK.  
7  
8  
9  
10  
11  
12

13 **COMPETING INTERESTS**  
14  
15

16 None declared.  
17  
18  
19  
20  
21  
22  
23  
24  
25  
26  
27  
28  
29  
30  
31  
32  
33  
34  
35  
36  
37  
38  
39  
40  
41  
42  
43  
44  
45  
46  
47  
48  
49  
50  
51  
52  
53  
54  
55  
56  
57  
58  
59  
60

For peer review only

## CONTRIBUTORS

J.F.G. designed the study, obtained the THIN data set, managed the analyses, performed some analyses, checked all the other analyses, and wrote the manuscript.

G.W.F. conducted much of the analyses.

P.V. scrutinised the analyses, suggested further analyses and helped interpret some of the findings.

All the authors were involved in revising the manuscript and gave final approval. J.F.G. is the guarantor of this work and, as such, had full access to all the data in the study and takes responsibility for the integrity of the data and the accuracy of the data analysis.

## ACKNOWLEDGEMENTS

The authors thank Kathryn Vowden, University of Bradford, Bradford, UK, for her appraisal and input into this manuscript.



## **ETHICS APPROVAL**

Ethics approval to use anonymised patients' records from the THIN database for this study was obtained from the Research Ethics Committee that appraises studies using the THIN database (Reference number 18THIN093).

## **DATA SHARING STATEMENT**

The THIN data set cannot be shared as this restriction was a condition of the ethics approval obtained from the Research Ethics Committee (Reference number 18THIN093). Questions concerning the data underlying the results can be sent to the Corresponding Author.

## INTRODUCTION

Our 2012/13 burden of wounds study estimated that the UK's National Health Service (NHS) managed 2.2 million patients with a wound at a cost of £5.3 billion [1-3]. An estimated 61% of all wounds in that burden of wounds study healed in the study year (79% of acute wounds and 43% of chronic wounds). Patients were predominantly managed in the community with 18.6 million practice nurse visits, 10.9 million community nurse visits, 7.7 million general practitioner (GP) visits, 3.4 million hospital outpatient visits. Five years ago, patients also received 97.1 million drug prescriptions and 262.2 million dressings. Additionally, only 16% of all cases with an ulcer of the lower limb had a Doppler ankle brachial pressure index recorded in their records [1].

This study led to such concern among politicians that the UK Parliament (House of Lords) debated developing a national strategy for improving the standards of wound care in the NHS [4]. As a consequence, NHS England and NHS Improvement established the National Wound Care Strategy Programme in the last quarter of 2018 [5]. The aim of the Programme is to scope the development of a national strategy for wound care in England that focuses on improving care relating to pressure ulcers, lower limb ulcers and surgical wounds [5].

Between 2012 and 2017 there was an estimated 4% decline in the number of practice nurses and a 30% decline in the number of district nurses involved in front-line patient care [6-9]. During this period we reported on unwarranted variation in wound care arising in part from inconsistencies in staff involvement and dressing choice and in many instances a lack of a coherent treatment plan [10-16]. Hence, it is reasonable to assume that not all patients with equal need have always had access to, or received, the same continuous levels of healthcare. However, patients should be afforded the best care available (within the context of limited resources) in order to obtain maximum health gains [17].

The aim of this new study was to assess the extent of change in the burden of wounds over five years (i.e. between 2012/13 and 2017/18) in terms of annual prevalence, health outcomes, healthcare resource use and NHS costs.

## METHODS

### Study Design

This was a retrospective cohort analysis of the anonymised case records of patients with a wound randomly extracted from The Health Improvement Network (THIN) database. The perspective of the analysis was the UK's NHS.

### The THIN Database

The THIN database contains electronic records on >11 million anonymised patients entered by GPs from >560 practices across the UK. The patient composition within the THIN database has been shown to be representative of the UK population in terms of demographics and disease distribution [18] and the database theoretically contains patients' entire medical history. In particular, the database collects data on the dates that patients registered or left their practice as well as demographic data such as date of birth and gender. Patients who reside at the same address or are members of the same family can be linked using a household identifier, provided they are registered with the same general practice.

All medical conditions and symptoms recorded electronically during a patient's consultation in the general practice are recorded in the THIN database, thereby building up long computerised medical histories using Read Codes [19]. GP prescribing is computerised and entered directly into the database. Prescriptions not issued electronically (e.g. during home visits) are also entered, however, there is a possibility of under-recording of such items. Information is also recorded on referrals to secondary care, including the specialty. Secondary care information and other medically related information received by the practice are entered into the database. This includes details on hospital admissions, discharge medication, diagnosis, outpatient consultations, investigations and treatment outcomes. Details from other healthcare interventions, such as information on lifestyle and preventative healthcare, as well as a range of variables such as height, weight, body mass index, blood pressure, smoking and alcohol status, immunisation and laboratory test results are also recorded. Hence, the information contained in the THIN database reflects actual clinical practice.

(THIN is a registered trademark of Cegedim SA in the United Kingdom and other countries. Reference made to the THIN database is intended to be descriptive of the data asset licensed by IQVIA, who interrogated the database and performed the randomisation independently of the Authors. The Authors had no direct access to the THIN database.)

## Study Population

The study population comprised the anonymised case records of a randomly selected cohort of 3,000 patients from the THIN database (provided to the Authors by IQVIA) who had a wound between 1 March 2017 and 28 February 2018.

Patients were included in the data set if they:

- Were 18 years of age or over.
- Had one of 2,095 wound-related Read codes (Table S1).
- Had continuous medical history in their case record from the first mention of a wound in the study year up to the time the data were extracted from the database, unless they died, in order to exclude patients who had moved or changed their general practice.

Patients were excluded from the data set if they had a surgical wound that healed within four weeks of the surgical procedure (since any resource use incurred would be due to the surgical procedure and not the wound) or if they had a dermatological tumour. These inclusion/exclusion criteria are identical to those used in our earlier 2012/13 study [1].

Every patient in the THIN database who fulfilled the study's inclusion and exclusion criteria was assigned a random number by IQVIA. A representative sample was then generated by random selection of the random numbers of the whole cohort using a uniform distribution. As such, IQVIA advised that the random sample was representative of the whole population from which it was derived. The complete electronic records of the 3,000 patients in the sample were then supplied to the Authors, which enabled analysis of data both within and outside of the study period.

## Patient and Public Involvement

Patients and members of the public were not directly involved in this study. The study population was limited to the anonymised records of patients in the THIN database.

## Study Variables and Statistical Analyses

Wound type was documented in the patients' records and the authors categorised them as being either acute (i.e. abscess, burn, open wound, unhealed surgical wound, trauma) or chronic (i.e. diabetic foot ulcer, arterial leg ulcer, mixed leg ulcer, venous leg ulcer, pressure ulcer). The following information was systematically extracted from the patients' electronic records over the 12 months from 1 March 2017 to 28 February 2018 according to the protocol approved by the ethics committee.

- Patients' characteristics.
- Patients' comorbidities (defined as a non-acute condition that patients were suffering from in the year before the start of their wound and not necessarily the year before the start of the study period).
- Wound-related healthcare resource use (i.e. dressings, bandages, topical treatments, negative pressure wound therapy, district nurse and healthcare assistants visits (both of whom provide care within a patient's home), practice nurse visits (who provide care within a GP's surgery), GP visits, hospital outpatient visits, laboratory tests), prescribed medication (i.e. analgesics, non-steroidal anti-inflammatory drugs (NSAIDs) and systemic anti-infectives (principally antibiotics)).
- Clinical outcomes (i.e. healing and putative infection).

If a patient received a bandage or dressing on a specific date, but a clinician visit was not documented in their record, it was assumed the patient had been seen outside of the general practice by a district nurse or healthcare assistant. No other assumptions were made regarding missing data and there were no other interpolations.

The use of individual healthcare resources was quantified for all the patients, individually. These quantities were then used to estimate the total utilisation of each healthcare resource attributable to wound management during the study period, stratified by wound type.

1  
2  
3 Clinical outcomes and wound-related healthcare resource use associated with the sample of  
4 3,000 patients were used to model the healing rates and annual amounts of healthcare resource  
5 use associated with wound care provided by the NHS in 2017/18.  
6  
7  
8  
9

10 Differences between subgroups were tested for statistical significance using a  $\chi^2$  test. Logistic  
11 regression was used to investigate relationships between baseline variables and clinical  
12 outcomes. The p values  $<0.05$  were considered statistically significant and have been reported.  
13 All p values  $\geq 0.05$  were not considered to be statistically significant and these numerical values  
14 have not been reported. All statistical analyses were performed using IBM SPSS Statistics  
15 (IBM UK, Portsmouth, Hampshire, UK).  
16  
17  
18  
19  
20  
21

### 22 **Cost of Patient Management**

23  
24  
25 The NHS cost of wound care for each patient was estimated by assigning unit costs at 2017/18  
26 prices [20-22] to the quantity of healthcare resources used by individual patients from the time  
27 a patient entered the data set (i.e. from 1 March 2017 or the start time of their wound if it  
28 occurred later) up to the time their wound healed or the end of the study period, whichever  
29 came first. The total cost of utilisation of each healthcare resource for the sample of 3,000  
30 patients was then combined in order to estimate their total NHS cost of wound management  
31 over the study period. The NHS cost of wound management for this cohort was then used to  
32 model the total cost of wound care provided by the NHS in 2017/18. The cost of wound care  
33 was also estimated by stratifying patients according to their category of wound. Accordingly,  
34 the study only considers the cost of patient management attributable to wounds in primary and  
35 secondary care settings, and does not estimate patients' overall healthcare costs.  
36  
37  
38  
39  
40  
41  
42  
43  
44  
45

### 46 **Sensitivity Analyses**

47  
48  
49 Deterministic sensitivity analyses were performed on all of the model's inputs to identify how  
50 the NHS cost of wound management would change by varying the different parameters in the  
51 model.  
52  
53  
54  
55  
56  
57  
58  
59  
60

## RESULTS

### Prevalence of Wounds in the UK

The base population of the THIN database in 2017/18 was 2.4 million active adult patients who were  $\geq 18$  years of age. The database was interrogated, independently of the Authors, to identify patients with at least one of the 2,095 wound-related Read codes. The search identified 174,569 adult patients with a wound in 2017/18 who matched the study protocol's inclusion and exclusion criteria. The UK's population comprised 52.1 million adults who were  $\geq 18$  years of age in mid-2017 [23]. Using these variables, the outputs of the modelling were extrapolated to the whole adult population in the UK. Accordingly, the model estimated that there were 3.8 million adult patients with a wound in the UK in 2017/18 who matched the study protocol's inclusion and exclusion criteria, equivalent to 7% of the adult population (Table 1).

Sixteen per cent of all wounds had no diagnosis and it was not possible to infer a wound type from the patients' records. Additionally, 9% of all wounds were a leg ulcer without any further characterisation (i.e. venous, arterial or mixed). Hence, the records of 25% of all wounds lacked a recorded differential diagnoses. In total, there were 1 million ulcers of the lower limb, which equates to 2.0% of the adult population having a lower limb ulcer in the study year. Of these, the number of diagnosed venous leg ulcers (560,000) indicates that 1.1% of all adults  $\geq 18$  years of age had such an ulcer in the study year. In addition, there were an estimated 326,000 diabetic foot ulcers, which equates to 9% of all adult diabetic patients (i.e. 3.46 million individuals [24]) having a foot ulcer in the study year. There were an estimated 202,000 recorded pressure ulcers in the study year, equivalent to 0.4% of the total adult population (Table 1).

### Patients' Characteristics

A representative sample of 3,000 patients was randomly selected from the cohort of 174,569 patients with a wound-related Read code by IQVIA. Patients' age in the randomly selected study population was a mean of 57.9 years and 67% were  $< 65$  years of age. A total of 56% of patients were female. Mean blood pressure was 130/77 and patients' body mass index was a mean 29.1 kg/m<sup>2</sup>. An estimated 17% of patients were smokers, 30% were ex-smokers and 52% were non-smokers. A total of 73% of patients presented with a new wound in the study year

(patients' records predated the onset of the study period, enabling both pre-existing and new wounds to be identified). Table 2 summarises patients' characteristics according to wound type.

A total of 95% of patients had at least one comorbidity in the year before the start of their wound. It is also noteworthy that 13% of patients with a pressure ulcer were recorded as suffering from malnutrition, whereas it was  $\leq 5\%$  of patients with other wound types. Moreover, patients had a mean of 4.1 comorbid conditions and 57% of all patients had diabetes. The percentage of patients with different comorbidities in the year before the start of their wound (and not necessarily the year before the start of the study) is summarised in Table 3.

### Clinical Outcomes

The THIN database does not define wound healing. Wound healing was a clinical observation documented in the patient's record by their managing clinician, but not necessarily confirmed by a specialist, and it is unknown if the clinicians who managed these patients used any consistent definition. Nevertheless, an episode of care was not a proxy for time to healing. Furthermore, if a wound was not recorded as being healed it was considered to be unhealed. This assumption was supported by continued clinician visits for wound care and the continued prescribing of wound care products. On this basis, Table 4 summarises the recorded healing rates stratified by wound type and various sub-groups between 1 March 2017 and 28 February 2018. A total of 70% of all wounds ( $n = 2.7$  million) healed in the study year; 89% of acute wounds healed and 49% of chronic wounds. An estimated 30% of all wounds ( $n = 1.1$  million) remained unhealed. Patients' age did not appear to affect the overall healing rate. However, 59% of chronic wounds healed if there was no evidence of infection compared to 45% if there was a definite or suspected infection. The healing rate among acute wounds was unaffected by the presence of infection (86% versus 91% among acute wounds with no evidence of infection). An estimated 38% of chronic wounds healed if patients were smokers compared to 55% and 58% if patients were non-smokers or ex-smokers, respectively. Smoking status did not appear to affect the healing rate of acute wounds (Table 4).

For the whole cohort of patients with a wound, binary logistic regression suggested that cardiovascular disease (Odds ratio (OR) 0.57 (95% CI 0.46 to 0.71);  $p < 0.001$ ), immunological disorders (OR 0.62 (95% CI 0.45 to 0.86);  $p = 0.003$ ) and renal disorders (OR 0.56 (95% CI 0.43 to 0.73);  $p < 0.001$ ) were independent risk factors for non-healing during the study period.



1  
2  
3 Additionally, the presence of renal disease was an independent risk factor for non-healing of  
4 diabetic foot ulcers (OR 0.28 (95% CI: 0.13 to 0.62);  $p = 0.002$ ), and diabetes was an  
5 independent risk factor for non-healing of venous leg ulcers (OR 0.10 (95% CI: 0.01 to 0.96);  
6  $p < 0.02$ ).  
7  
8  
9

### 10 11 12 **Healthcare Resource Use Associated with Patient Management** 13

14  
15 Patients were predominantly managed in the community by GPs, practice nurses,  
16 district/community nurses and healthcare assistants. Table 5 summarises the percentage of  
17 patients who utilised different resources during the study year and Table 6 shows the annualised  
18 resources associated with each wound type. All the hospital admissions attributable to venous  
19 leg ulcers and mixed leg ulcers appeared to be linked to a suspected infection. So too were 80%  
20 of admissions attributable to diabetic foot ulcers and 95% of admissions attributable to open  
21 wounds. Less than 50% of admissions attributable to the other wound types appeared to be  
22 linked to a suspected infection. Only one-third of admissions attributable to surgical wounds  
23 and trauma appeared to be linked to a suspected infection.  
24  
25  
26  
27  
28  
29  
30

31  
32 Patients' treatment varied according to wound type and wound duration. Patients were  
33 prescribed a mix of dressings up to the time their wound healed or the end of the study period,  
34 whichever came first. Overall, patients' dressings were changed every 3-4 days. However, this  
35 varied according to wound type. On average:  
36  
37  
38

- 39 • Those patients with a burn or a venous leg ulcer had one nursing visit/dressing change  
40 every 2-3 days.
- 41 • Those patients with a diabetic foot ulcer, arterial leg ulcer, mixed leg ulcer, pressure ulcer  
42 or surgical wound had one nursing visit/dressing change every 3-4 days.
- 43 • Those patients with an unspecified leg ulcer, open wound, trauma or unspecified wound  
44 had one nursing visit/dressing change every 4-5 days.
- 45 • Those patients with an abscess had one nursing visit/dressing change every 5-6 days  
46  
47  
48  
49  
50  
51

52  
53 Less than 1% of patients were prescribed the same dressing for the duration of their wound or  
54 study period. On average, patients were prescribed a mean of 8 different dressing types over  
55 the study period, ranging from a mean of 4 different dressing types for patients with a burn to  
56 a mean of 9 different dressing types for patients with an unclassified wound. In addition to  
57  
58  
59  
60

1  
2  
3 dressings and bandages, varying percentages of patients were prescribed analgesics, NSAIDs  
4 and antibiotics as shown in Table 5.  
5  
6  
7

8 Assessment of peripheral perfusion is a recognised requirement for leg ulcer and diabetic foot  
9 management. However, only 15% of all those with a leg or foot ulcer had a Doppler ankle  
10 brachial pressure index (ABPI) recorded in their records, of which 75% were prescribed some  
11 form of compression. Of the 85% who did not have their ABPI recorded, 29% were prescribed  
12 compression bandages/hosiery (Table 7). Over 90% of the patients with a recorded venous leg  
13 ulcer were prescribed compression bandages/hosiery, irrespective of whether they had their  
14 ABPI recorded; so too did >50% of patients with a recorded diabetic foot ulcer (Table 7).  
15  
16  
17  
18  
19  
20  
21

### 22 **NHS Cost of Patient Management**

23  
24  
25

26 The total annual NHS cost of managing 3.8 million patients with a wound was estimated to be  
27 £8.3 billion (Table 8). District/community nurse visits were the primary cost driver accounting  
28 for 29% of all costs and GP office visits were the secondary cost driver accounting for a further  
29 18% of the total cost. Healthcare assistant visits accounted for 17% of the total cost, practice  
30 nurse visits for 7% and wound care products for a further 6% (Table 8).  
31  
32  
33  
34  
35

36 Resource use associated with managing the unhealed wounds was substantially greater than  
37 that of managing the healed wounds (Table 9). Consequently, the annual cost of managing the  
38 70% of wounds that healed was estimated to be £2.7 billion compared with £5.6 billion for the  
39 30% of wounds that did not heal within the study year. In addition, within the study period, the  
40 cost per healed wound ranged from £358 to £4,684 per patient and that of an unhealed wound  
41 ranged from £831 to £7,886 per patient (Table 10).  
42  
43  
44  
45  
46  
47

48 Eighty one per cent of the total annual NHS cost was incurred in the community and the  
49 remainder in secondary care. However, the distribution of costs varied according to wound  
50 type, with 68% and 85% of the total annual NHS cost of managing acute and chronic wounds,  
51 respectively, being incurred in the community and the remainder in secondary care.  
52  
53  
54  
55  
56  
57  
58  
59  
60

## Sensitivity Analyses

When the healing rate of each wound type was simultaneously varied by  $\pm 25\%$ , the total annual NHS cost of wound management changed by  $\pm 16\%$ . When the estimated annual number of each wound type was individually changed by  $\pm 25\%$ , the total annual NHS cost of wound management changed by 10% or less. When the estimated amounts of resource use were individually varied by  $\pm 25\%$ , the total annual NHS cost of managing 3.8 million wounds changed by 7% or less. When the unit costs of wound care products were simultaneously varied by  $\pm 25\%$ , the total annual NHS cost of managing 3.8 million patients with a wound changed by  $<3\%$ .

## DISCUSSION

The 2012/13 burden of wounds study [1, 2] incorporated a predictive model [3] which forecast that the prevalence of wounds would increase by 11% per annum. Thus, the model predicted there would be 3.8 million patients with a wound in 2017/18. Our current analysis suggests that this predictive model is relatively accurate, with the overall annual number of patients with a wound having increased by 71% over the five years to 3.8 million. However, the rate of increase varied according to wound type. The annual number of patients with a wound increased by  $\geq 100\%$  for many wound types, but some acute wounds increased by 60% and pressure ulcers by only 32%, perhaps due in part to the ongoing pressure ulcer prevention campaign [25]. The model also predicted that costs would increase in parallel with prevalence. However, when the £5.3 billion [1] is uprated to 2017/18 prices (i.e. £5.6 billion), it would appear that the annual cost of wound care has increased at an approximate rate of 8-9% per annum. Hence, the overall annual NHS cost of wound care has increased by 48% in real terms over the five years.

The aim of this study was to assess the annual health economic burden of wounds by quantifying the amount of resource use and corresponding costs incurred by patients in 2017/18. From the NHS' perspective, resource use and corresponding cost of managing a patient with multiple wounds does not end until all the wounds heal. Some of the patients in our data set may have had multiple wounds, but this was not specifically listed within the database and was not transparent in the patients' records. Furthermore, it would be very difficult to retrospectively extricate resource use for different wounds from the records of a patient with multiple wounds of the same aetiology. Notwithstanding this, it would be unusual for an individual to have two wounds of different aetiologies at the same time. However, it may be that in 2017/18 some of the patients with an ulcer of the lower limb had a second ulcer, although it would be unlikely that patients with other wounds would have multiple wounds. If 10% of patients with an ulcer of the lower limb had a second ulcer, the total number of wounds would increase by 5% from 3.8 million to 4.0 million. The implication of this is that the NHS may have managed more than 3.8 million wounds in 2017/18. Nevertheless, the estimated amount of resource use and corresponding costs as presented would remain unchanged since all the resources and wound care products utilised in managing each patient were documented in their record (despite the lack of granularity surrounding the number of wounds they may have had).

1  
2  
3 In the 2012/13 data set, 65% of all the patients with a wound were 65 years of age or older [1,  
4 2]. However, in the 2017/18 data set, only 33% of patients were 65 years of age or older. This  
5 was a significant difference ( $p < 0.001$ ), suggesting that wounds are no longer predominantly  
6 the preserve of the elderly. In 2012/13, 39% of all patients were non-smokers. However, by  
7 2017/18 this percentage had increased significantly to 52% ( $p < 0.001$ ). In parallel with these  
8 changes in the patient demographics there was a change in the distribution of comorbidities. In  
9 particular, in 2012/13, 73% and 37% of patients had cardiovascular and musculoskeletal  
10 disorders, but in 2017/18 an estimated 53% ( $p < 0.001$ ) and 56% ( $p < 0.02$ ) had cardiovascular  
11 and musculoskeletal disorders, respectively. Most striking, however, was that 29% of the  
12 2012/13 cohort had diabetes compared with 57% in 2017/18 ( $p < 0.05$ ).  
13  
14  
15  
16  
17  
18  
19  
20  
21

22 Over the five year period, the healing rate of acute wounds increased by a mean of 13% and  
23 that of chronic wounds by a mean of 15%. However, within this estimate, the healing rate of  
24 diabetic foot ulcers and pressure ulcers increased by 27% and 43%, respectively, but the  
25 healing rate of venous and mixed leg ulcers decreased by 21% and 28%, respectively. The  
26 percentage of patients accessing different resources increased over the five years and so too  
27 did the absolute amount of resource use. For example, between 2012/13 and 2017/18 there was  
28 >11,000% increase in the number of healthcare assistant visits (from 0.5 million to 53.6  
29 million), a 401% increase in the number of district nurse visits (from 10.9 million to 54.4  
30 million), a 164% increase in the number of GP visits (from 7.7 million to 20.3 million), 96%  
31 increase in the number of hospital outpatient visits (from 3.4 million to 6.8 million) and 51%  
32 increase in the number of practice nurse visits (from 18.6 million to 28.1 million). In addition,  
33 there was a 2% decrease in the number of specialist nurse visits and a 104% increase in the  
34 amount of wound care products used. The changes in the annual cost of these resources mirror  
35 the changes in utilisation of these resources. Accordingly, the NHS cost of wound care in  
36 2017/18 was an estimated £8.3 billion, which is approaching the combined annual NHS cost  
37 of managing osteo and rheumatoid arthritis, which was reported to be £10.2 billion in 2017  
38 [26].  
39  
40  
41  
42  
43  
44  
45  
46  
47  
48  
49  
50  
51

52  
53 The shift towards greater utilisation of community-based resources is reflected in the  
54 distribution of care between secondary care and the community. In 2012/13, 48% of the costs  
55 of managing acute wounds and 78% of the costs of managing chronic wounds were incurred  
56 in the community and the remainder in secondary care [1, 2]. In 2017/18, 68% and 85% of the  
57  
58  
59  
60

1  
2  
3 costs of managing acute and chronic wounds, respectively, were incurred in the community  
4 and the remainder in secondary care.  
5  
6  
7

8  
9 This present study has also highlighted that resource use associated with managing the 30% of  
10 wounds that did not heal in the study year was substantially greater than that of managing the  
11 70% of wounds that did heal within the study year (e.g. 325% more hospital outpatient visits,  
12 178% more practice nurse visits, 171% more GP visits, 118% more accident & emergency  
13 attendances, 97% more district/community nurse visits and 85% more healthcare assistant  
14 visits). Consequently, the annual cost of managing wounds that healed within the study year  
15 was estimated to be £2.7 billion compared with £5.6 billion for the 30% of wounds that did not  
16 heal within the study year. In addition, the mean cost of an unhealed wound (£3,700) was  
17 approximately 2.5 times more than that of a wound that healed during the study period  
18 (£1,500). Sensitivity analysis showed the healing rate to have a large effect on the cost of  
19 wound care and regression analysis indicated that the presence of cardiovascular disease or  
20 immunological disorders or renal disorders were all independent risk factors for non-healing  
21 during the study period. In the 2012/13 study both nutritional deficiency and diabetes were  
22 independent risk factors for non-healing during the study period [1]. In this study, only a mean  
23 of 3% of patients had malnutrition, possible reflecting the significantly lower age of the study  
24 population. However, 13% of patients with a pressure ulcer had malnutrition and their BMI  
25 was a mean of 24.5 kg/m<sup>2</sup> which was lower than that of patients with other wound types.  
26 Diabetes did not exert an independent effect on healing possibly because 59% of the patients  
27 with diabetes also had cardiovascular disease, 19% had renal disease, and 11% had  
28 immunological disorders. In addition, 61% of the patients with diabetes had musculoskeletal  
29 disorders and 38% had a mental health condition (principally depression and anxiety). The age  
30 of the patients with diabetes was a mean of 59.2 years per patient and 44% were male.  
31  
32  
33  
34  
35  
36  
37  
38  
39  
40  
41  
42  
43  
44  
45  
46  
47

48 This and many other studies [10-12, 27, 28] have shown that wound management is  
49 predominantly a nurse-led discipline. Nevertheless, there still seems to be minimal clinical  
50 involvement of tissue viability nurses and other specialist nurses in direct patient management.  
51 In addition, dressing and bandage types were continually switched at successive wound  
52 dressing changes for the majority of patients, suggesting confusion and conflict within the  
53 treatment plan. Moreover, an estimated 25% of all wounds being managed within the NHS in  
54 2017/18 lacked a recorded differential diagnosis in the patient's record. Furthermore, only 15%  
55 of patients with an ulcer on the lower limb had a vascular assessment with Doppler ABPI  
56  
57  
58  
59  
60

1  
2  
3 recorded in their records, contrary to national guidance [29, 30]. Nevertheless, we observed a  
4 14% decrease in the proportion of patients with unspecified leg ulcers since 2015 which may  
5 be due to an increase in measuring ABPI even if it was not documented in the patients' records.  
6 It remains unclear and disappointing to find that records still lacked documentation of this  
7 essential investigation. Moreover, five years later, patients' records still appear to lack any  
8 evidence of consistent reporting of wound management processes. This may be indicative of  
9 the difficulties experienced by non-specialist health care professionals in the community with  
10 establishing a working diagnosis.  
11  
12  
13  
14  
15  
16  
17  
18

19 It seems unclear how the NHS can best respond to the ever increasing demand for wound care.  
20 The NHS Long Term Plan [31] has described how the NHS will move to a new service model  
21 in which patients will have properly joined-up care at the right time in the optimal care setting.  
22 This will involve having online 'digital' GP consultations, and redesigned hospital support in  
23 order to free-up about one-third of outpatient appointments [31]. Additionally, GP practices  
24 will be funded to create integrated teams of GPs, community health and social care staff [31].  
25 These expanded community health teams will provide fast support to people in their own  
26 homes [31]. Ultimately, the NHS will aim to create Integrated Care Systems everywhere by  
27 April 2021, which bring together local organisations to deliver a 'triple integration' of primary  
28 and specialist care, physical and mental health services and health with social care [31].  
29 Additionally, commissioners will be tasked to share decisions with providers on population  
30 health, service redesign and Long Term Plan implementation [31]. Such a change in the system  
31 may facilitate getting the optimum care to patients at the right time in the right setting in order  
32 to improve the patient experience and health outcomes, thereby freeing-up healthcare resources  
33 and reducing costs. However, will this method of care delivery improve wound care and patient  
34 outcomes? The introduction of truly seamless care with integrated electronic patient records  
35 would improve overall patient management, However, patients with wounds need face-to-face  
36 interaction with clinicians on a regular basis to monitor progress and have their dressings  
37 changed. The Authors are therefore of the opinion that this model would require the NHS to  
38 establish dedicated wound care clinics in the community at which patients receive consistent  
39 and integrated care from clinicians with qualified experience in wound care, with the clinics  
40 linking directly to electronic patient records which are integrated across all healthcare sectors.  
41 These clinics could provide both direct care and holistic assessments of patients allowing co-  
42 ordinated management of any comorbidities which may impact on wound healing  
43  
44  
45  
46  
47  
48  
49  
50  
51  
52  
53  
54  
55  
56  
57  
58  
59  
60



1  
2  
3 The advantages and disadvantages of using the THIN database for this study have been  
4 previously discussed [1]. In summary, the advantage of using the THIN database is that the  
5 patient pathways and associated resource use are based on real-world evidence derived from  
6 clinical practice. However, the possibility of resource use associated with managing a  
7 comorbidity being conflated with that of wound management cannot be excluded. While the  
8 study results are compelling, the analyses were based on clinicians' entries into their patients'  
9 records and inevitably subject to a certain amount of imprecision and lack of detail. Moreover,  
10 the computerised information in the THIN database is collected by GPs for clinical care  
11 purposes and not for research. Prescriptions issued by GPs and practice nurses are recorded in  
12 the database, but it does not specify whether the prescriptions were dispensed or detail patient  
13 compliance with the product. Despite these limitations, it is the authors' opinion that the THIN  
14 database affords one of the best sources of real-world evidence for clinical practice in the UK.  
15 Moreover, the changes between 2012/13 and 2017/18 are clinically relevant, since the sample  
16 size in this study is 3,000 patients versus 1,000 patients in the earlier study. Furthermore a  
17 review of Medline in August 2020 identified 283 articles in peer-reviewed journals in which  
18 the THIN database had been used to characterise clinical practice in a wide range of therapeutic  
19 areas in the UK, of which 28 had been published in BMJ Open since 2014.

20  
21  
22  
23  
24  
25  
26  
27  
28  
29  
30  
31  
32  
33  
34 The analysis does not consider the potential impact of those wounds that remained unhealed  
35 beyond the study period. The THIN database may have under-recorded use of some health care  
36 resources outside the GP's surgery if not documented in the GP records, and the impact of this  
37 was addressed in sensitivity analyses. In particular, not all community records may have been  
38 linked to the GP records. The analysis excludes hospital-based prescribing, but this should have  
39 minimal impact on the results as most prescribing is undertaken by GPs and nurses in the  
40 community. Also excluded is the potential impact of managing patients with wounds being  
41 cared for in nursing/residential homes.

42  
43  
44  
45  
46  
47  
48  
49  
50 The analysis only considered the annual cost of NHS resource use for the 'average adult  
51 patient', and no attempt was made to stratify resource use and costs according to gender,  
52 comorbidities, wound size, wound severity and other disease-related factors. Also excluded  
53 were the costs incurred by patients and indirect societal costs as a result of patients taking time  
54 off work. In 2012/13, only 35% of patients with a wound were of working age. However, in  
55 2017/18 nearly 70% of the cohort was less than 65 years of age and 6% of patients in this age  
56 group were admitted into hospital. In April 2018 the gross median salary for full-time  
57  
58  
59  
60



1  
2  
3 employees was £569 per week [32]. Hence, the indirect societal cost in lost GDP arising from  
4 hospitalisation (assuming 96% of these patients were in full-time employment [33]) amounted  
5 to £87 million. This is likely to be an underestimate, since a proportion of patients are likely to  
6 be absent from work due to their wound, but residing in their home. Nevertheless, this is a  
7 relatively negligible indirect cost considering that nocturia (which predominantly affects the  
8 elderly population) accounts for over £4 billion in lost GDP [34].  
9  
10  
11  
12  
13  
14

15 Notwithstanding the study's limitations, the real-world evidence highlights the substantial  
16 burden that wounds continue to impose on the NHS in an average year. Clinical and economic  
17 benefits to both patients and the NHS could accrue from strategies that focus on (a) accurate  
18 diagnosis, (b) preventing infection and (c) improving wound-healing rates. However, these  
19 benefits are unlikely to be realised unless there is a structural change within the NHS in order  
20 to manage the increasing demand for wound care.  
21  
22  
23  
24  
25  
26  
27  
28  
29  
30  
31  
32  
33  
34  
35  
36  
37  
38  
39  
40  
41  
42  
43  
44  
45  
46  
47  
48  
49  
50  
51  
52  
53  
54  
55  
56  
57  
58  
59  
60

## REFERENCES

1. Guest JF, Ayoub N, McIlwraith T, Uchegbu I, Gerrish A, Weidlich D et al. Health economic burden that wounds impose on the National Health Service in the UK. *BMJ Open*. 2015;5(12):e009283. doi:10.1136/bmjopen-2015-009283.
2. Guest JF, Ayoub N, McIlwraith T, Uchegbu I, Gerrish A, Weidlich D et al. Health economic burden that different wound types impose on the UK's National Health Service. *Int Wound J*. 2016. doi:10.1111/iwj.12603.
3. Guest JF, Vowden K, Vowden P. The health economic burden that acute and chronic wounds impose on an average clinical commissioning group/health board in the UK. *J Wound Care*. 2017;26(6):292-303. doi:10.12968/jowc.2017.26.6.292.
4. House of Lords Hansard. House of Lords debate on developing a strategy for improving the standards of wound care in the NHS. 2017. <https://hansard.parliament.uk/lords/2017-11-22/debates/6C57E65A-A04D-449B-82E9-C836F088A696/NHSWoundCare>.
5. NHS England. National Wound Care Strategy Programme. <https://www.ahsnnetwork.com/about-academic-health-science-networks/national-programmes-priorities/national-wound-care-strategy-programme>.
6. NHS Digital. general\_practice\_provisional\_tables\_december\_2017\_-\_nurse. 2018. <https://digital.nhs.uk/data-and-information/publications/statistical/general-and-personal-medical-services/as-at-31-december-2017-provisional-experimental-statistics>.
7. NHS Digital. nhs-staf-sept-2016-summ. 2017. <https://digital.nhs.uk/data-and-information/publications/statistical/nhs-workforce-statistics/nhs-workforce-statistics-november-2016-provisional-statistics>.
8. House of Commons Health Committee. The nursing workforce - Second Report of Session 2017–19: HC353,. 2018. <https://publications.parliament.uk/pa/cm201719/cmselect/cmhealth/353/353.pdf>.
9. Royal College of Nursing. The UK nursing labour market review 2018. 2018. <https://www.rcn.org.uk>
10. Guest JF, Fuller GW, Vowden P. Clinical outcomes and cost-effectiveness of three different compression systems in newly-diagnosed venous leg ulcers in the UK. *J Wound Care*. 2017;26(5):244-54. doi:10.12968/jowc.2017.26.5.244.
11. Guest JF, Singh H, Rana K, Vowden P. Cost-effectiveness of an electroceutical device in treating non-healing venous leg ulcers: results of an RCT. *J Wound Care*. 2018;27(4):230-43. doi:10.12968/jowc.2018.27.4.230.

- 1  
2  
3 12. Panca M, Cutting K, Guest JF. Clinical and cost-effectiveness of absorbent dressings in  
4 the treatment of highly exuding VLU. *J Wound Care*. 2013;22(3):109-18.  
5  
6 doi:10.12968/jowc.2013.22.3.109.  
7  
8 13. Guest JF, Fuller GW, Vowden P. Diabetic foot ulcer management in clinical practice in  
9 the UK: costs and outcomes. *Int Wound J*. 2018;15(1):43-52. doi:10.1111/iwj.12816.  
10  
11 14. Guest JF, Fuller GW, Vowden P. Venous leg ulcer management in clinical practice in the  
12 UK: costs and outcomes. *Int Wound J*. 2018;15(1):29-37. doi:10.1111/iwj.12814.  
13  
14 15. Guest JF, Fuller GW, Vowden P, Vowden KR. Cohort study evaluating pressure ulcer  
15 management in clinical practice in the UK following initial presentation in the community:  
16 costs and outcomes. *BMJ Open*. 2018;8(7):e021769. doi:10.1136/bmjopen-2018-021769.  
17  
18 16. Guest JF, Fuller GW, Vowden P. Costs and outcomes in evaluating management of  
19 unhealed surgical wounds in the community in clinical practice in the UK: a cohort study.  
20 *BMJ Open*. 2018;8(12):e022591. doi:10.1136/bmjopen-2018-022591.  
21  
22 17. Alderwick H, Robertson R, Appleby J, Dunn P, Maguire D. Better value in the NHS. The  
23 role of changes in clinical practice. 2015. [www.kingsfund.org.uk](http://www.kingsfund.org.uk).  
24  
25 18. Blak BT, Thompson M, Dattani H, Bourke A. Generalisability of The Health  
26 Improvement Network (THIN) database: demographics, chronic disease prevalence and  
27 mortality rates. *Inform Prim Care*. 2011;19(4):251-5.  
28  
29 19. NHS Digital. Read Codes. 2018. <https://digital.nhs.uk/article/1104/Read-Codes>. Accessed  
30 10 March 2018.  
31  
32 20. Curtis L, Burns A. Unit Costs of Health and Social Care 2018. University of Kent,  
33 Personal Social Services Research Unit, Canterbury. 2018. <https://kar.kent.ac.uk/70995/>.  
34 Accessed 25 July 2019.  
35  
36 21. Department of Health. National Schedule of NHS reference costs 2017/18.  
37 <https://improvement.nhs.uk/resources/reference-costs/>. Accessed 25 July 2019.  
38  
39 22. Drug Tariff. Drug Tariff. 2018. <https://www.drugtariff.co.uk>. Accessed 25 July 2019.  
40  
41 23. Office for National Statistics. 2017.  
42 <https://www.ons.gov.uk/peoplepopulationandcommunity/populationandmigration/population>  
43 [estimates/datasets/populationestimatesforukenglandandwalesscotlandandnorthernireland](https://www.ons.gov.uk/peoplepopulationandcommunity/populationandmigration/population).  
44  
45 24. Diabetes UK. Facts and Figures. 2019.  
46 <https://www.diabetes.org.uk/professionals/position-statements-reports/statistics>.  
47  
48 25. React to red skin. <http://www.reactoredskin.co.uk/>.  
49  
50 26. Arthritis Research UK. The Nation's Joint Problem. 2017.  
51 <https://www.arthritisresearch.org.uk>.  
52  
53  
54  
55  
56  
57  
58  
59  
60

- 1  
2  
3 27. Guest JF, Taylor RR, Vowden K, Vowden P. Relative cost-effectiveness of a skin  
4 protectant in managing venous leg ulcers in the UK. *J Wound Care*. 2012;21(8):389-98.  
5 doi:10.12968/jowc.2012.21.8.389.  
6  
7  
8 28. Guest JF, Ayoub N, Greaves T. Clinical outcomes and cost-effectiveness of an externally  
9 applied electroceutical device in managing venous leg ulcers in clinical practice in the UK. *J*  
10 *Wound Care*. 2015;24(12):572-80. doi:10.12968/jowc.2015.24.12.572.  
11  
12 29. Scottish Intercollegiate Guidelines Network. SIGN guideline 120: management of chronic  
13 venous leg ulcers. 2010. 2010. <http://sign.ac.uk/pdf/sign120.pdf>.  
14  
15 30. National Institute for Health and Care Excellence (NICE). Diabetic foot problems:  
16 prevention and management. NICE guidelines [NG19] 2015. 2015. [https://](https://nice.org.uk/guidance/ng19)  
17 [nice.org.uk/guidance/ng19](https://nice.org.uk/guidance/ng19). Accessed 30 November 2016.  
18  
19 31. NHS England. The NHS Long Term Plan. 2019. <https://www.longtermplan.nhs.uk/>.  
20  
21 32. Office for NaTIONAL Statistics. Employee earnings in the UK: 2018. 2018.  
22 [https://www.ons.gov.uk/employmentandlabourmarket/peopleinwork/earningsandworkinghou](https://www.ons.gov.uk/employmentandlabourmarket/peopleinwork/earningsandworkinghours/bulletins/annualsurveyofhoursandearnings/2018)  
23 [rs/bulletins/annualsurveyofhoursandearnings/2018](https://www.ons.gov.uk/employmentandlabourmarket/peopleinwork/earningsandworkinghours/bulletins/annualsurveyofhoursandearnings/2018).  
24  
25 33. Office for National Statistics. Unemployment. 2018.  
26 <https://www.ons.gov.uk/employmentandlabourmarket/peoplenotinwork/unemployment>.  
27  
28 34. Weidlich D, Andersson FL, Oelke M, Drake MJ, Jonasson AF, Guest JF. Annual direct  
29 and indirect costs attributable to nocturia in Germany, Sweden, and the UK. *Eur J Health*  
30 *Econ*. 2017;18(6):761-71. doi:10.1007/s10198-016-0826-x.  
31  
32  
33  
34  
35  
36  
37  
38  
39  
40  
41  
42  
43  
44  
45  
46  
47  
48  
49  
50  
51  
52  
53  
54  
55  
56  
57  
58  
59  
60

**Table 1: Annual number of adult patients with a wound and prevalence of different wound types in the UK. Percentage of total number in parentheses.**

|                         | Annual number of patients with a wound in 2017/18 (thousands) | Annual prevalence among the adult UK population in 2017/18 | Annual number of patients with a wound in 2012/13 (thousands) [1] | Percentage change in the annual number of patients with a wound between 2012/13 and 2017/18 |
|-------------------------|---------------------------------------------------------------|------------------------------------------------------------|-------------------------------------------------------------------|---------------------------------------------------------------------------------------------|
| Abscess                 | 293,000 (8%)                                                  | 0.0056                                                     | 160,000 (7%)                                                      | 83%                                                                                         |
| Burn                    | 222,000 (6%)                                                  | 0.0043                                                     | 87,000 (4%)                                                       | 155%                                                                                        |
| Diabetic foot ulcer     | 326,000 (9%)                                                  | 0.0063                                                     | 169,000 (8%)                                                      | 93%                                                                                         |
| Leg ulcer (arterial)    | 31,000 (1%)                                                   | 0.0022                                                     | 9,000 (<1%)                                                       | 244%                                                                                        |
| Leg ulcer (mixed)       | 102,000 (3%)                                                  | 0.0003                                                     | 24,000 (1%)                                                       | 325%                                                                                        |
| Leg ulcer (unspecified) | 361,000 (9%)                                                  | 0.0069                                                     | 420,000 (19%)                                                     | -14%                                                                                        |
| Leg ulcer (venous)      | 560,000 (15%)                                                 | 0.0108                                                     | 278,000 (13%)                                                     | 101%                                                                                        |
| Open wound              | 337,000 (9%)                                                  | 0.0065                                                     | 240,000 (11%)                                                     | 40%                                                                                         |
| Pressure ulcer          | 202,000 (5%)                                                  | 0.0039                                                     | 153,000 (7%)                                                      | 32%                                                                                         |
| Surgical wound          | 519,000 (14%)                                                 | 0.0100                                                     | 253,000 (11%)                                                     | 105%                                                                                        |
| Trauma                  | 249,000 (7%)                                                  | 0.0048                                                     | 158,000 (7%)                                                      | 58%                                                                                         |
| Unspecified             | 600,000 (16%)                                                 | 0.0115                                                     | 271,000 (12%)                                                     | 121%                                                                                        |
| <b>TOTAL</b>            | <b>3,802,000 (100%)</b>                                       | <b>0.0730</b>                                              | <b>2,222,000 (100%)</b>                                           | <b>71%</b>                                                                                  |

**Table 2: Patients' baseline characteristics.**

|                                                          | Abscess | Burn | Diabetic<br>foot ulcer | Leg ulcer<br>(arterial) | Leg ulcer<br>(mixed) | Leg ulcer<br>(unspecified) | Leg ulcer<br>(venous) | Open<br>wound | Pressure<br>ulcer | Surgical<br>wound | Trauma | Unspecified | All<br>wounds |
|----------------------------------------------------------|---------|------|------------------------|-------------------------|----------------------|----------------------------|-----------------------|---------------|-------------------|-------------------|--------|-------------|---------------|
| Mean age per patient<br>(years)                          | 46.0    | 47.1 | 62.3                   | 57.4                    | 67.0                 | 52.6                       | 70.9                  | 53.4          | 76.1              | 55.4              | 52.4   | 55.9        | 57.9          |
| Percentage male                                          | 42%     | 35%  | 51%                    | 22%                     | 57%                  | 39%                        | 48%                   | 40%           | 40%               | 42%               | 41%    | 49%         | 44%           |
| Percentage smoker                                        | 29%     | 24%  | 11%                    | 13%                     | 10%                  | 21%                        | 7%                    | 18%           | 7%                | 19%               | 16%    | 22%         | 17%           |
| Percentage ex-smoker                                     | 19%     | 19%  | 37%                    | 32%                     | 30%                  | 21%                        | 44%                   | 29%           | 40%               | 29%               | 23%    | 28%         | 30%           |
| Percentage non-<br>smoker                                | 51%     | 56%  | 52%                    | 55%                     | 60%                  | 58%                        | 48%                   | 51%           | 40%               | 52%               | 59%    | 49%         | 52%           |
| Percentage with<br>unknown smoking<br>status             | 2%      | 0%   | 0%                     | 0%                      | 0%                   | 0%                         | 0%                    | 2%            | 13%               | 1%                | 1%     | 1%          | 1%            |
| Mean body mass index<br>per patient (kg/m <sup>2</sup> ) | 29.7    | 27.9 | 30.9                   | 28.8                    | 32.3                 | 27.6                       | 31.5                  | 29.6          | 24.5              | 28.3              | 27.8   | 28.9        | 29.1          |
| Percentage with new<br>wounds in the study<br>period     | 79%     | 79%  | 61%                    | 33%                     | 50%                  | 68%                        | 59%                   | 87%           | 80%               | 77%               | 84%    | 80%         | 73%           |
| Percentage of all<br>wounds with a<br>recorded infection | 27%     | 13%  | 78%                    | 52%                     | 47%                  | 68%                        | 41%                   | 94%           | 13%               | 35%               | 29%    | 1%          | 40%           |

**Table 3: Percentage of patients with a comorbidity in the year before the start of their wound.** Those with diabetes are a subset of those with endocrinological comorbidities.

|                     | Abscess | Burn | Diabetic<br>foot ulcer | Leg ulcer<br>(arterial) | Leg ulcer<br>(mixed) | Leg ulcer<br>(unspecified) | Leg ulcer<br>(venous) | Open<br>wound | Pressure<br>ulcer | Surgical<br>wound | Trauma | Unspecified | All<br>wounds |
|---------------------|---------|------|------------------------|-------------------------|----------------------|----------------------------|-----------------------|---------------|-------------------|-------------------|--------|-------------|---------------|
| Cardiovascular      | 36%     | 35%  | 70%                    | 67%                     | 83%                  | 45%                        | 78%                   | 44%           | 53%               | 47%               | 38%    | 51%         | 53%           |
| Dermatological      | 48%     | 52%  | 60%                    | 44%                     | 63%                  | 50%                        | 41%                   | 51%           | 40%               | 51%               | 54%    | 45%         | 49%           |
| Endocrinological    | 52%     | 56%  | 99%                    | 78%                     | 97%                  | 18%                        | 52%                   | 69%           | 60%               | 63%               | 55%    | 57%         | 60%           |
| Diabetes            | 50%     | 52%  | 100%                   | 78%                     | 97%                  | 13%                        | 37%                   | 67%           | 60%               | 59%               | 51%    | 52%         | 57%           |
| Gastroenterological | 29%     | 32%  | 42%                    | 67%                     | 33%                  | 29%                        | 19%                   | 34%           | 47%               | 37%               | 31%    | 35%         | 33%           |
| Genito-urinary      | 21%     | 24%  | 28%                    | 44%                     | 33%                  | 18%                        | 19%                   | 25%           | 27%               | 28%               | 24%    | 24%         | 24%           |
| Immunological       | 7%      | 11%  | 13%                    | 11%                     | 17%                  | 3%                         | 11%                   | 10%           | 7%                | 9%                | 8%     | 9%          | 9%            |
| Malnutrition        | 0%      | 2%   | 2%                     | 0%                      | 0%                   | 5%                         | 4%                    | 1%            | 13%               | 1%                | 2%     | 3%          | 3%            |
| Musculoskeletal     | 41%     | 56%  | 62%                    | 67%                     | 63%                  | 61%                        | 59%                   | 49%           | 73%               | 57%               | 49%    | 56%         | 56%           |
| Neurological        | 16%     | 21%  | 24%                    | 11%                     | 27%                  | 24%                        | 33%                   | 18%           | 67%               | 22%               | 17%    | 17%         | 24%           |
| Oncological         | 14%     | 16%  | 25%                    | 11%                     | 20%                  | 16%                        | 7%                    | 14%           | 27%               | 18%               | 15%    | 19%         | 16%           |
| Ophthalmological    | 8%      | 15%  | 20%                    | 0%                      | 27%                  | 13%                        | 4%                    | 11%           | 33%               | 13%               | 11%    | 10%         | 12%           |
| Psychiatric         | 44%     | 40%  | 39%                    | 33%                     | 53%                  | 47%                        | 15%                   | 35%           | 33%               | 35%               | 32%    | 35%         | 35%           |
| Renal               | 8%      | 5%   | 30%                    | 22%                     | 33%                  | 13%                        | 30%                   | 12%           | 40%               | 14%               | 9%     | 16%         | 18%           |
| Respiratory         | 38%     | 44%  | 45%                    | 56%                     | 43%                  | 42%                        | 33%                   | 36%           | 33%               | 38%               | 36%    | 37%         | 38%           |

**Table 4: Healing rates in the study period.**

|                                                        | Abscess | Burn | Diabetic foot ulcer | Leg ulcer (arterial) | Leg ulcer (mixed) | Leg ulcer (unspecified) | Leg ulcer (venous) | Open wound | Pressure ulcer | Surgical wound | Trauma | Unspecified | All wounds |
|--------------------------------------------------------|---------|------|---------------------|----------------------|-------------------|-------------------------|--------------------|------------|----------------|----------------|--------|-------------|------------|
| Wounds that healed in the study period                 | 86%     | 84%  | 52%                 | 47%                  | 30%               | 55%                     | 37%                | 90%        | 60%            | 85%            | 94%    | 85%         | 70%        |
| New wounds that healed in the study period             | 85%     | 80%  | 60%                 | 40%                  | 27%               | 38%                     | 56%                | 90%        | 75%            | 86%            | 94%    | 88%         | 76%        |
| Existing wounds that healed in the study period        | 89%     | 96%  | 40%                 | 50%                  | 33%               | 92%                     | 9%                 | 90%        | 0%             | 80%            | 96%    | 73%         | 56%        |
| Wounds that healed with no evidence of infection       | 92%     | 85%  | 57%                 | 50%                  | 34%               | 60%                     | 50%                | 93%        | 62%            | 87%            | 95%    | 86%         | 77%        |
| Wounds that healed with recorded evidence of infection | 69%     | 75%  | 50%                 | 45%                  | 25%               | 52%                     | 18%                | 89%        | 50%            | 81%            | 91%    | 38%         | 60%        |
| Wounds that healed among smokers                       | 84%     | 87%  | 33%                 | 37%                  | 28%               | 48%                     | 25%                | 88%        | 33%            | 82%            | 96%    | 85%         | 64%        |
| Wounds that healed among ex-smokers                    | 90%     | 75%  | 53%                 | 47%                  | 32%               | 53%                     | 39%                | 88%        | 67%            | 83%            | 95%    | 88%         | 70%        |
| Wounds that healed among non-smokers                   | 87%     | 87%  | 56%                 | 50%                  | 30%               | 58%                     | 38%                | 93%        | 75%            | 88%            | 96%    | 84%         | 74%        |



**Table 5: Percentage of patients who utilised resources in the study year. \*Includes tissue viability nurses and diabetic nurse specialists.**

|                                                         | Abscess | Burn | Diabetic foot ulcer | Leg ulcer (arterial) | Leg ulcer (mixed) | Leg ulcer (unspecified) | Leg ulcer (venous) | Open wound | Pressure ulcer | Surgical wound | Trauma | Unspecified | All wounds |
|---------------------------------------------------------|---------|------|---------------------|----------------------|-------------------|-------------------------|--------------------|------------|----------------|----------------|--------|-------------|------------|
| District/community nurse visits                         | 37%     | 52%  | 96%                 | 89%                  | 93%               | 82%                     | 85%                | 24%        | 60%            | 46%            | 15%    | 44%         | 38%        |
| Healthcare assistant visits                             | 32%     | 27%  | 93%                 | 89%                  | 99%               | 84%                     | 81%                | 21%        | 40%            | 46%            | 15%    | 44%         | 36%        |
| Practice nurse visits                                   | 96%     | 94%  | 94%                 | 100%                 | 100%              | 79%                     | 96%                | 97%        | 93%            | 97%            | 98%    | 98%         | 97%        |
| GP office visits                                        | 94%     | 79%  | 97%                 | 100%                 | 100%              | 100%                    | 100%               | 90%        | 93%            | 82%            | 93%    | 62%         | 84%        |
| Dressings                                               | 100%    | 100% | 100%                | 100%                 | 100%              | 100%                    | 100%               | 100%       | 100%           | 100%           | 100%   | 100%        | 100%       |
| Compression bandaging/hosiery                           | 2%      | 5%   | 15%                 | 0%                   | 100%              | 26%                     | 93%                | 5%         | 0%             | 3%             | 0%     | 6%          | 6%         |
| Prescribed analgesics/non-steroidal anti-inflammatories | 22%     | 19%  | 57%                 | 67%                  | 87%               | 32%                     | 81%                | 12%        | 53%            | 24%            | 10%    | 20%         | 21%        |
| Prescribed antibiotics                                  | 82%     | 42%  | 92%                 | 97%                  | 90%               | 84%                     | 81%                | 81%        | 67%            | 43%            | 37%    | 26%         | 50%        |
| Hospital outpatient visits with a nurse                 | 11%     | 32%  | 35%                 | 22%                  | 33%               | 16%                     | 37%                | 8%         | 0%             | 18%            | 5%     | 31%         | 17%        |
| Accident & emergency attendances                        | 16%     | 18%  | 23%                 | 22%                  | 27%               | 5%                      | 30%                | 8%         | 7%             | 8%             | 5%     | 4%          | 8%         |
| Hospital admissions without surgery                     | 7%      | 8%   | 4%                  | 0%                   | 3%                | 5%                      | 7%                 | 7%         | 13%            | 8%             | 5%     | 8%          | 7%         |
| Hospital outpatient visits with a physician/surgeon     | 4%      | 0%   | 15%                 | 22%                  | 7%                | 8%                      | 7%                 | 4%         | 20%            | 8%             | 7%     | 1%          | 5%         |
| GP home visits                                          | 2%      | 3%   | 2%                  | 0%                   | 10%               | 0%                      | 11%                | 1%         | 13%            | 2%             | 1%     | 1%          | 2%         |
| Diagnostic tests                                        | 1%      | 2%   | 3%                  | 0%                   | 10%               | 3%                      | 0%                 | 1%         | 0%             | 2%             | 1%     | 3%          | 2%         |
| Ambulance services                                      | 1%      | 0%   | 3%                  | 0%                   | 3%                | 0%                      | 4%                 | 0%         | 0%             | 1%             | 0%     | 1%          | 1%         |
| Hospital admissions with surgery                        | 2%      | 2%   | 2%                  | 0%                   | 0%                | 0%                      | 0%                 | 0%         | 0%             | 6%             | 1%     | 0%          | 2%         |
| Specialist nurse visits*                                | 0%      | 0%   | 3%                  | 0%                   | 10%               | 0%                      | 0%                 | 0%         | 7%             | 1%             | 0%     | 1%          | 1%         |
| Podiatrist visits                                       | 1%      | 0%   | 3%                  | 33%                  | 17%               | 0%                      | 0%                 | 1%         | 7%             | 1%             | <1%    | 0%          | 1%         |
| Day Cases                                               | 1%      | 0%   | 0%                  | 0%                   | 0%                | 0%                      | 0%                 | 0%         | 0%             | 1%             | 0%     | <1%         | <1%        |

**Table 6: Annual amount of NHS resource use attributable to managing 3.8 million patients with a wound (thousands).** \*Includes tissue viability nurses and diabetic nurse specialists.

|                                                     | Abscess | Burn    | Diabetic foot ulcer | Leg ulcer (arterial) | Leg ulcer (mixed) | Leg ulcer (unspecified) | Leg ulcer (venous) | Open wound | Pressure ulcer | Surgical wound | Trauma  | Unspecified | All wounds |
|-----------------------------------------------------|---------|---------|---------------------|----------------------|-------------------|-------------------------|--------------------|------------|----------------|----------------|---------|-------------|------------|
| District/community nurse visits                     | 1069.31 | 2124.01 | 10443.18            | 895.38               | 4411.41           | 6093.17                 | 17459.02           | 797.34     | 5789.24        | 2791.44        | 234.97  | 2305.39     | 54413.86   |
| Healthcare assistant visits                         | 1111.38 | 1283.91 | 10641.73            | 1020.07              | 4671.18           | 6946.81                 | 17619.78           | 804.15     | 3839.82        | 3047.33        | 238.16  | 2423.08     | 53647.40   |
| Practice nurse visits                               | 745.32  | 484.97  | 3428.04             | 187.60               | 1938.34           | 1278.84                 | 14461.10           | 545.16     | 1128.81        | 1217.10        | 290.62  | 2356.74     | 28062.63   |
| GP office visits                                    | 632.13  | 382.27  | 2436.59             | 115.97               | 1173.09           | 1102.64                 | 9855.13            | 497.20     | 1196.00        | 983.00         | 292.53  | 1424.03     | 20090.58   |
| Dressings                                           | 7383.46 | 5580.89 | 51475.28            | 4007.17              | 19817.92          | 26030.08                | 79863.80           | 6759.11    | 9467.04        | 27172.85       | 4028.25 | 22913.59    | 264499.43  |
| Compression bandaging/hosiery                       | 160.32  | 62.52   | 588.14              | 0.00                 | 1691.43           | 258.85                  | 27259.29           | 239.70     | 0.00           | 260.19         | 0.00    | 407.91      | 30928.35   |
| Prescribed medication                               | 827.59  | 235.79  | 2948.13             | 242.17               | 1473.18           | 1787.04                 | 5498.12            | 641.18     | 1760.41        | 922.26         | 177.91  | 1359.55     | 17873.33   |
| Hospital outpatient visits with a nurse             | 171.46  | 171.49  | 583.20              | 20.47                | 709.31            | 190.11                  | 3672.33            | 43.82      | 0.00           | 286.86         | 18.26   | 600.07      | 6467.37    |
| Accident & emergency attendances                    | 57.15   | 46.44   | 150.74              | 10.23                | 47.74             | 19.01                   | 248.97             | 30.40      | 40.32          | 57.93          | 13.23   | 35.83       | 758.00     |
| Hospital admissions without surgery                 | 24.01   | 17.86   | 19.77               | 0.00                 | 3.41              | 19.01                   | 62.24              | 33.98      | 26.88          | 60.74          | 23.30   | 78.81       | 370.01     |
| Hospital outpatient visits with a physician/surgeon | 18.29   | 0.00    | 61.78               | 6.82                 | 10.23             | 28.52                   | 41.50              | 14.31      | 40.32          | 40.18          | 18.26   | 5.37        | 285.57     |
| GP home visits                                      | 5.72    | 7.15    | 14.83               | 0.00                 | 17.05             | 0.00                    | 62.24              | 5.37       | 40.32          | 11.21          | 1.89    | 24.18       | 189.95     |
| Diagnostic tests                                    | 1.14    | 3.57    | 17.30               | 0.00                 | 30.69             | 47.53                   | 0.00               | 3.58       | 0.00           | 14.02          | 2.83    | 23.29       | 143.95     |
| Ambulance services                                  | 2.29    | 0.00    | 9.89                | 0.00                 | 3.41              | 0.00                    | 41.50              | 0.00       | 0.00           | 4.67           | 0.00    | 5.37        | 67.12      |
| Hospital admissions with surgery                    | 4.57    | 3.57    | 4.94                | 0.00                 | 0.00              | 0.00                    | 0.00               | 0.00       | 0.00           | 34.57          | 3.46    | 0.00        | 51.12      |
| Specialist nurse visits*                            | 0.00    | 0.00    | 17.30               | 0.00                 | 10.23             | 0.00                    | 0.00               | 0.00       | 13.44          | 0.93           | 0.00    | 3.74        | 45.64      |
| Podiatrist visits                                   | 2.29    | 0.00    | 9.89                | 13.64                | 17.05             | 0.00                    | 0.00               | 0.89       | 13.44          | 1.87           | 0.32    | 0.00        | 59.38      |
| Day Cases                                           | 1.14    | 0.00    | 0.00                | 0.00                 | 0.00              | 0.00                    | 0.00               | 0.00       | 0.00           | 1.87           | 0.00    | 0.90        | 3.91       |

**Table 7: Use of Doppler in patients with an ulcer of the lower limb to measure ankle brachial pressure index (ABPI).**

| Ulcer type            | Percentage who had a Doppler | Percentage who did not have a Doppler | Percentage of these who were prescribed a compression bandage/hosiery |
|-----------------------|------------------------------|---------------------------------------|-----------------------------------------------------------------------|
| Venous leg ulcer      | 59%                          | 41%                                   | 88%                                                                   |
| Arterial leg ulcer    | 22%                          | 78%                                   | 0%                                                                    |
| Mixed Leg ulcer       | 27%                          | 73%                                   | 100%                                                                  |
| Unspecified leg ulcer | 0%                           | 100%                                  | 0%                                                                    |
| Diabetic foot ulcer   | 8%                           | 92%                                   | 50%                                                                   |
| All lower limb ulcers | 15%                          | 85%                                   | 75%                                                                   |

**Table 8: Annual cost of NHS resource use attributable to managing 3.8 million patients with a wound (£ million at 2017/18 prices).**

Percentage of total cost in parentheses. \*Includes tissue viability nurses and diabetic nurse specialists.

|                                                     | Abscess        | Burn           | Diabetic foot ulcer | Leg ulcer (arterial) | Leg ulcer (mixed) | Leg ulcer (unspecified) | Leg ulcer (venous) | Open wound     | Pressure ulcer | Surgical wound | Trauma        | Unspecified    | Total                  |
|-----------------------------------------------------|----------------|----------------|---------------------|----------------------|-------------------|-------------------------|--------------------|----------------|----------------|----------------|---------------|----------------|------------------------|
| District/community nurse visits                     | £48.12         | £95.58         | £469.94             | £40.29               | £198.51           | £274.19                 | £785.66            | £35.88         | £260.52        | £125.61        | £10.57        | £103.74        | £2,448.61 (29%)        |
| GP office visits                                    | £46.78         | £28.29         | £180.31             | £8.58                | £86.81            | £81.60                  | £729.28            | £36.79         | £88.50         | £72.74         | £21.65        | £105.38        | £1,486.71 (18%)        |
| Healthcare assistant visits                         | £28.90         | £33.38         | £276.69             | £26.52               | £121.45           | £180.62                 | £458.11            | £20.91         | £99.84         | £79.23         | £6.19         | £63.00         | £1,394.84 (17%)        |
| Hospital admissions without surgery                 | £30.25         | £22.51         | £24.91              | £0.00                | £11.06            | £61.67                  | £201.92            | £42.82         | £33.86         | £76.53         | £29.36        | £99.31         | £634.20 (8%)           |
| Hospital outpatient visits with a nurse             | £16.65         | £16.66         | £56.65              | £1.99                | £68.90            | £18.47                  | £356.69            | £4.26          | £0.00          | £27.86         | £1.77         | £58.28         | £628.18 (8%)           |
| Practice nurse visits                               | £15.65         | £10.18         | £71.99              | £3.94                | £40.71            | £26.86                  | £303.68            | £11.45         | £23.71         | £25.56         | £6.10         | £49.49         | £589.32 (7%)           |
| Wound care products                                 | £10.81         | £12.65         | £92.48              | £5.80                | £38.14            | £39.24                  | £225.10            | £10.68         | £19.05         | £33.57         | £5.50         | £38.36         | £531.38 (6%)           |
| Prescribed medication                               | £12.90         | £3.68          | £45.55              | £3.74                | £22.67            | £27.76                  | £84.36             | £10.00         | £27.09         | £14.30         | £2.79         | £20.90         | £275.74 (3%)           |
| Hospital admissions with surgery                    | £9.67          | £13.38         | £20.69              | £0.00                | £0.00             | £0.00                   | £0.00              | £0.00          | £0.00          | £73.12         | £7.33         | £0.00          | £124.19 (1%)           |
| Accident & emergency attendances                    | £9.16          | £7.44          | £24.15              | £1.64                | £7.65             | £3.05                   | £39.89             | £4.87          | £6.46          | £9.28          | £2.12         | £5.74          | £121.45 (1%)           |
| Hospital outpatient visits with a physician/surgeon | £2.44          | £0.00          | £8.23               | £0.91                | £1.36             | £3.80                   | £5.53              | £1.91          | £5.37          | £5.35          | £2.43         | £0.72          | £38.05 (<1%)           |
| GP home visits                                      | £0.69          | £0.87          | £1.80               | £0.00                | £2.07             | £0.00                   | £7.56              | £0.65          | £4.90          | £1.36          | £0.23         | £2.94          | £23.07 (<1%)           |
| Ambulance services                                  | £0.35          | £0.00          | £1.49               | £0.00                | £0.52             | £0.00                   | £6.27              | £0.00          | £0.00          | £0.71          | £0.00         | £0.81          | £10.15 (<1%)           |
| Podiatrist visits                                   | £0.31          | £0.00          | £1.34               | £1.85                | £2.31             | £0.00                   | £0.00              | £0.12          | £1.82          | £0.25          | £0.04         | £0.00          | £8.04 (<1%)            |
| Day Cases                                           | £0.84          | £0.00          | £0.00               | £0.00                | £0.00             | £0.00                   | £0.00              | £0.00          | £0.00          | £1.37          | £0.00         | £0.66          | £2.87 (<1%)            |
| Specialist nurse visits*                            | £0.00          | £0.00          | £1.11               | £0.00                | £0.66             | £0.00                   | £0.00              | £0.00          | £0.86          | £0.06          | £0.00         | £0.24          | £2.93 (<1%)            |
| Diagnostic tests                                    | £0.00          | £0.01          | £0.03               | £0.00                | £0.06             | £0.09                   | £0.00              | £0.01          | £0.00          | £0.03          | £0.01         | £0.04          | £0.28 (<1%)            |
| <b>TOTAL COST</b>                                   | <b>£233.52</b> | <b>£244.63</b> | <b>£1,277.36</b>    | <b>£95.26</b>        | <b>£602.88</b>    | <b>£717.35</b>          | <b>£3,204.05</b>   | <b>£180.35</b> | <b>£571.98</b> | <b>£546.93</b> | <b>£96.09</b> | <b>£549.61</b> | <b>£8320.01 (100%)</b> |

**Table 9: Annual amount and corresponding cost (at 2017/18 prices) of NHS resource use attributable to managing 3.8 million patients with a wound, stratified by healing.** \*Includes tissue viability nurses and diabetic nurse specialists.

|                                                                             | Annual number (thousand) |           |                                           | Annual cost of wounds (£ million) |           |                                            |
|-----------------------------------------------------------------------------|--------------------------|-----------|-------------------------------------------|-----------------------------------|-----------|--------------------------------------------|
|                                                                             | Healed                   | Unhealed  | Percentage difference in resource use (%) | Healed                            | Unhealed  | Percentage difference in resource cost (%) |
| Number of patients with a wound                                             | 2,677.00                 | 1,125.00  |                                           |                                   |           |                                            |
| Ambulance services                                                          | 4.51                     | 62.61     | 1288%                                     | £0.68                             | £9.47     | 1293%                                      |
| Hospital outpatient visits                                                  | 1,286.86                 | 5,466.09  | 325%                                      | £130.85                           | £535.38   | 309%                                       |
| Practice nurse visits                                                       | 7,430.80                 | 20,631.83 | 178%                                      | £156.05                           | £433.27   | 178%                                       |
| GP visits                                                                   | 5,460.16                 | 14,820.36 | 171%                                      | £407.22                           | £1,102.56 | 171%                                       |
| Podiatrist visits                                                           | 16.11                    | 43.27     | 169%                                      | £2.18                             | £5.86     | 169%                                       |
| Prescribed medication                                                       | 5,593.33                 | 12,280.00 | 120%                                      | £86.72                            | £189.02   | 118%                                       |
| Accident & Emergency attendances                                            | 238.34                   | 519.66    | 118%                                      | £38.19                            | £83.26    | 118%                                       |
| District/community nurse visits                                             | 18,342.87                | 36,070.99 | 97%                                       | £825.59                           | £1,623.02 | 97%                                        |
| Wound care products (dressings/bandages/hosiery/creams/ointments/tapes etc) |                          |           |                                           | £181.06                           | £350.32   | 93%                                        |
| Healthcare assistant visits                                                 | 18,816.65                | 34,830.75 | 85%                                       | £489.23                           | £905.61   | 85%                                        |
| Specialist nurse visits*                                                    | 21.12                    | 24.52     | 16%                                       | £1.35                             | £1.58     | 17%                                        |
| Hospital admissions & day cases                                             | 286.73                   | 138.31    | -52%                                      | £427.89                           | £333.37   | -22%                                       |
| Diagnostic tests                                                            | 86.89                    | 57.06     | -34%                                      | £0.19                             | £0.09     | -53%                                       |
| TOTAL                                                                       |                          |           |                                           | £2,747.20                         | £5,572.81 | 103%                                       |

**Table 10: Total annual NHS cost (at 2017/18 prices) of wound care attributable to managing 3.8 million patients with a wound and cost per patient, stratified by healing.**

|                         | Total NHS Cost for all patients (£ million) |                 | Mean annual NHS cost per patient |                |
|-------------------------|---------------------------------------------|-----------------|----------------------------------|----------------|
|                         | Healed wounds                               | Unhealed wounds | Healed wounds                    | Unhealed wound |
| Abscess                 | 152.12                                      | 81.40           | £604.88                          | £1,977.94      |
| Burn                    | 140.23                                      | 104.40          | £754.81                          | £2,922.16      |
| Diabetic foot ulcer     | 490.11                                      | 787.25          | £2,874.36                        | £5,056.71      |
| Leg ulcer (arterial)    | 53.70                                       | 41.56           | £2,623.83                        | £4,061.31      |
| Leg ulcer (mixed)       | 143.77                                      | 459.11          | £4,684.15                        | £6,411.01      |
| Leg ulcer (unspecified) | 379.58                                      | 337.77          | £1,901.79                        | £2,089.98      |
| Leg ulcer (venous)      | 422.56                                      | 2781.49         | £2,036.67                        | £7,886.05      |
| Open wound              | 127.51                                      | 52.84           | £421.83                          | £1,515.03      |
| Pressure ulcer          | 90.44                                       | 481.54          | £747.75                          | £5,972.28      |
| Surgical wound          | 389.92                                      | 157.01          | £884.11                          | £2,024.49      |
| Trauma                  | 83.78                                       | 12.31           | £358.09                          | £831.63        |
| Unspecified             | 273.48                                      | 276.13          | £533.82                          | £3,146.03      |

| Read Code | Description                                           |
|-----------|-------------------------------------------------------|
| 2924      | O/E - trophic skin ulceration                         |
| 2924.00   | O/E - trophic skin ulceration                         |
| 3511      | Surgical biopsy taken                                 |
| 3511.00   | Surgical biopsy taken                                 |
| 8343.00   | Immobilisation of wound                               |
| 14F3.00   | H/O: chronic skin ulcer                               |
| 14F4.00   | H/O: Admission in last year for diabetes foot problem |
| 14F5.00   | H/O: venous leg ulcer                                 |
| 14F6.00   | H/O: foot ulcer                                       |
| 14F7.00   | H/O: arterial lower limb ulcer                        |
| 22L..00   | O/E - wound healing                                   |
| 22L1.00   | O/E - Wound healed                                    |
| 22L2.00   | O/E - Wound healing well                              |
| 22L3.00   | O/E - Wound healing badly                             |
| 22L3.11   | O/E wound healing delayed                             |
| 22L4.00   | O/E - Wound infected                                  |
| 22L5.00   | O/E - protruding suture                               |
| 22L6.00   | O/E - wound necrotic                                  |
| 22Q..00   | Wound observation                                     |
| 22Q0.00   | Length of wound                                       |
| 22Q1.00   | Width of wound                                        |
| 22Q3.00   | Wound dirty                                           |
| 22Q4.00   | Depth of wound                                        |
| 22Q6.00   | Wound discharge                                       |
| 22Q8.00   | Critical colonisation of wound                        |
| 22Q9.00   | Traumatic wound                                       |
| 22QA.00   | Surgical wound                                        |
| 22QB.00   | Fungating wound                                       |
| 26B8.00   | O/E - ulcerated breast lesion                         |
| 26B8.11   | O/E - ulcer on breast                                 |
| 2Fb..00   | Granulation of tissue                                 |
| 2FF..00   | O/E - skin ulcer                                      |
| 2FF1.00   | O/E - no skin ulcer                                   |
| 2FF2.00   | O/E - skin ulcer present                              |
| 2FF3.00   | O/E - depth of ulcer                                  |
| 2FFZ.00   | O/E - skin ulcer NOS                                  |
| 2FG7.00   | O/E - healed burn scar                                |
| 2FI..00   | O/E - sinus in skin                                   |
| 2FI2.00   | O/E -skin sinus-post operation                        |
| 2FI3.00   | O/E - skin sinus -after injury                        |
| 2FI4.00   | O/E - suppuration skin sinus                          |
| 2FIZ.00   | O/E - skin sinus NOS                                  |
| 2G48.00   | O/E - ankle ulcer                                     |
| 2G4E.00   | Healed leg ulcer                                      |
| 2G54.00   | O/E - Right foot ulcer                                |
| 2G55.00   | O/E - Left foot ulcer                                 |
| 2G5H.00   | O/E - Right diabetic foot - ulcerated                 |
| 2G5L.00   | O/E - Left diabetic foot - ulcerated                  |
| 2G5Q.00   | O/E - No left foot ulcer                              |

|    |         |                                                              |
|----|---------|--------------------------------------------------------------|
| 1  |         |                                                              |
| 2  | 2G5R.00 | O/E - No right foot ulcer                                    |
| 3  | 2G5S.00 | O/E - right healed foot ulcer                                |
| 4  | 2G5T.00 | O/E - left healed foot ulcer                                 |
| 5  | 2G5V.00 | O/E - right chronic diabetic foot ulcer                      |
| 6  | 2G5W.00 | O/E - left chronic diabetic foot ulcer                       |
| 7  |         |                                                              |
| 8  | 2G63.00 | Ischaemic toe                                                |
| 9  | 2G64.00 | O/E - infected toe                                           |
| 10 | 2I16.00 | O/E - gangrene                                               |
| 11 | 38C4.00 | Leg ulcer assessment                                         |
| 12 | 38N..00 | Wound assessment                                             |
| 13 | 38Qi.00 | SINBAD (site,isch,neuro,bact inf,depth) wound classification |
| 14 | 39C0.00 | Pressure sore                                                |
| 15 | 39C1.00 | Superficial pressure sore                                    |
| 16 | 39C2.00 | Deep pressure sore                                           |
| 17 | 39C3.00 | Pressure sore -deep + superfic                               |
| 18 | 39C4.00 | Waterlow pressure sore risk score                            |
| 19 | 39C4200 | Waterlow major surgery/trauma score                          |
| 20 | 39C5.00 | Medley pressure sore risk score                              |
| 21 | 39C6.00 | Maelor pressure ulcer risk assessment score                  |
| 22 | 39C6.11 | Maelor score                                                 |
| 23 | 39C7.00 | EPUAP (European pressure ulcer advisory panel) grade 1 ulcer |
| 24 | 39C8.00 | EPUAP (European pressure ulcer advisory panel) grade 2 ulcer |
| 25 | 39C9.00 | EPUAP (European pressure ulcer advisory panel) grade 3 ulcer |
| 26 | 39CA.00 | EPUAP (European pressure ulcer advisory panel) grade 4 ulcer |
| 27 | 4I1F.00 | Wound microscopy, culture and sensitivities                  |
| 28 | 4I2D.00 | Wound exudate sample                                         |
| 29 | 4I2D.11 | Wound swab                                                   |
| 30 | 4I2D000 | Wound swab culture positive                                  |
| 31 | 4I2D100 | Wound swab culture negative                                  |
| 32 | 4JG3.00 | Skin ulcer swab taken                                        |
| 33 | 4JG4.00 | Skin wound swab taken                                        |
| 34 | 58C4.00 | Photography of wound                                         |
| 35 | 6AD1.00 | Wound repair review                                          |
| 36 | 7F23400 | Repair of episiotomy                                         |
| 37 | 7F23y00 | Other specified immediate repair of obstetric laceration     |
| 38 | 7F24.00 | Other obstetric operations                                   |
| 39 | 7F24y00 | Other specified other obstetric operation                    |
| 40 | 7F24z00 | Other obstetric operation NOS                                |
| 41 | 7G06.00 | Curettage of lesion of skin                                  |
| 42 | 7G06.11 | Curettage of lesion of skin or subcutaneous tissue           |
| 43 | 7G06.12 | Curettage of lesion of skin including head and neck          |
| 44 | 7G06000 | Curettage and cauterisation of lesion of skin head or neck   |
| 45 | 7G06100 | Curettage and cauterisation of lesion of skin NEC            |
| 46 | 7G06111 | Curettage and cauterisation of skin wart NEC                 |
| 47 | 7G06200 | Curettage of lesion of skin of head or neck NEC              |
| 48 | 7G06300 | Curettage of sinus NEC                                       |
| 49 | 7G06400 | Curettage of wound NEC                                       |
| 50 | 7G06y00 | Other specified curettage of lesion of skin                  |
| 51 | 7G06z00 | Curettage of lesion of skin NOS                              |
| 52 | 7G2C000 | Toilet or clean burnt skin of head or neck                   |
| 53 |         |                                                              |
| 54 |         |                                                              |
| 55 |         |                                                              |
| 56 |         |                                                              |
| 57 |         |                                                              |
| 58 |         |                                                              |
| 59 |         |                                                              |
| 60 |         |                                                              |



|    |         |                                                              |
|----|---------|--------------------------------------------------------------|
| 1  |         |                                                              |
| 2  | 7G2C100 | Toilet or clean burnt skin NEC                               |
| 3  | 7G2C200 | Debridement of burnt skin of head and neck                   |
| 4  | 7G2C300 | Debridement of burnt skin NEC                                |
| 5  | 7G2C400 | Toilet to burnt skin of head or neck NEC                     |
| 6  | 7G2C500 | Tangent excision of burnt skin of head or neck               |
| 7  | 7G2C600 | Tangent excision of burnt skin NEC                           |
| 8  | 7G2CE00 | Removal of slough from burnt skin NEC                        |
| 9  | 7G2CE11 | Escharotomy of burnt skin NEC                                |
| 10 | 7G2CF00 | Cleansing and sterilisation of burnt skin of head or neck    |
| 11 | 7G2CG00 | Dress burnt skin head or neck us vacuum assisted clos device |
| 12 | 7G2CH00 | Cleansing and sterilisation of burnt skin NEC                |
| 13 | 7G2CJ00 | Dressing burnt skin using vacuum assisted closure device NEC |
| 14 | 7G2Cy00 | Other specified toilet to burnt skin                         |
| 15 | 7G2Cz00 | Toilet to burnt skin NOS                                     |
| 16 | 7G2D.00 | Other skin toilet                                            |
| 17 | 7G2D000 | Debridement of skin NEC                                      |
| 18 | 7G2D011 | Debridement of wound of skin NEC                             |
| 19 | 7G2D100 | Debridement of skin of head or neck NEC                      |
| 20 | 7G2D200 | Removal of slough from skin NEC                              |
| 21 | 7G2D300 | Removal of slough from skin of head or neck NEC              |
| 22 | 7G2D400 | Toilet to skin of head or neck NEC                           |
| 23 | 7G2D500 | Cleaning of skin wound NEC                                   |
| 24 | 7G2D600 | Cleaning of skin wound of head or neck                       |
| 25 | 7G2D700 | Cleansing and sterilisation of skin of head or neck NEC      |
| 26 | 7G2D800 | Cleansing and sterilisation of skin NEC                      |
| 27 | 7G2D900 | Dres skin head or neck us vacuum assisted closure device NEC |
| 28 | 7G2DA00 | Dressing of skin using vacuum assisted closure device NEC    |
| 29 | 7G2DB00 | Removal of slough from skin using pressurised fluid jet      |
| 30 | 7G2Dy00 | Other specified toilet to skin                               |
| 31 | 7G2Dz00 | Other toilet to skin NOS                                     |
| 32 | 7G2E.00 | Dressing of skin or wound                                    |
| 33 | 7G2E.11 | Dressing of skin                                             |
| 34 | 7G2E000 | Dressing of burnt skin of head or neck                       |
| 35 | 7G2E100 | Dressing of burnt skin NEC                                   |
| 36 | 7G2E200 | Dressing of skin of head or neck NEC                         |
| 37 | 7G2E300 | Dressing of skin NEC                                         |
| 38 | 7G2E400 | Dressing of skin of head or neck NEC                         |
| 39 | 7G2E500 | Dressing of skin ulcer NEC                                   |
| 40 | 7G2E600 | Attention to dressing of burn of head or neck                |
| 41 | 7G2E700 | Attention to dressing of burnt skin NEC                      |
| 42 | 7G2E800 | Attention to dressing of skin of head or neck NEC            |
| 43 | 7G2E900 | Attention to dressing of skin NEC                            |
| 44 | 7G2EA00 | Two layer compression bandage for skin ulcer                 |
| 45 | 7G2EB00 | Four layer compression bandaging for skin ulcer              |
| 46 | 7G2EC00 | Three layer compression bandage for skin ulcer               |
| 47 | 7G2Ey00 | Other specified dressing of skin                             |
| 48 | 7G2Ez00 | Dressing of skin NOS                                         |
| 49 | 7G2G000 | Dermabrasion of skin of head or neck                         |
| 50 | 7G2G100 | Dermabrasion of skin NEC                                     |
| 51 | 7G2G400 | Refashioning of scar                                         |
| 52 |         |                                                              |
| 53 |         |                                                              |
| 54 |         |                                                              |
| 55 |         |                                                              |
| 56 |         |                                                              |
| 57 |         |                                                              |
| 58 |         |                                                              |
| 59 |         |                                                              |
| 60 |         |                                                              |

|    |         |                                                             |
|----|---------|-------------------------------------------------------------|
| 1  |         |                                                             |
| 2  | 7P23200 | Delivery of rehabilitation for burns                        |
| 3  | 81H..00 | Dressing of wound                                           |
| 4  | 81H1.00 | Dressing of ulcer                                           |
| 5  | 81H2.00 | Dressing of burn                                            |
| 6  | 81H3.00 | Attention to dressing of skin                               |
| 7  | 81H4.00 | Checking dressing of skin                                   |
| 8  | 81H5.00 | Change of dressing                                          |
| 9  | 81Hy.00 | Other wound dressing                                        |
| 10 | 81HZ.00 | Wound dressing NOS                                          |
| 11 | 8BC7.00 | Glueing of wound                                            |
| 12 | 8BN..00 | Treatment of wound with maggots                             |
| 13 | 8C1L.00 | Wound care                                                  |
| 14 | 8C1M.00 | Post-operative wound care                                   |
| 15 | 8C1M.11 | Post-surgical wound care                                    |
| 16 | 8C1Q.00 | Compression hosiery procedure                               |
| 17 | 8C22.00 | Oxygenation of slough                                       |
| 18 | 8C6..00 | Wound dressing requested by accident and emergency service  |
| 19 | 8C7..00 | Suture removal requested by accident and emergency service  |
| 20 | 8CA4T00 | Dietary education for wound healing                         |
| 21 | 8CA4T11 | Dietary advice for wound healing                            |
| 22 | 8Cd9.00 | Advice given about wound care                               |
| 23 | 8CK..00 | Skin care                                                   |
| 24 | 8CMT.00 | Leg ulcer care pathway                                      |
| 25 | 8CS3.00 | Agreeing on leg ulcer treatment plan                        |
| 26 | 8CT1.00 | Leg ulcer compression therapy finished                      |
| 27 | 8CV2.00 | Leg ulcer compression therapy started                       |
| 28 | 8H15.00 | Admit to burns unit                                         |
| 29 | 8H5E.00 | Burns referral                                              |
| 30 | 8HIV.00 | Referral for complex wound care                             |
| 31 | 8HTh.00 | Referral to leg ulcer clinic                                |
| 32 | 9kd..00 | Complex wound care - enhanced services administration       |
| 33 | 9ks..00 | Complex skin ulcer care enhanced services administration    |
| 34 | 9kY..00 | Review of wound repair - enhanced services administration   |
| 35 | 9kY..11 | Review of wound repair                                      |
| 36 | 9N0t.00 | Seen in primary care leg ulcer clinic                       |
| 37 | 9N0z.00 | Seen in burns clinic                                        |
| 38 | 9N2m.00 | Seen by tissue viability nurse specialist                   |
| 39 | 9N7L.00 | Postop wound management gen secondary care done by practice |
| 40 | 9NM5.00 | Attending leg ulcer clinic                                  |
| 41 | A056.00 | Amoebic skin ulceration                                     |
| 42 | A170.00 | Tuberculosis of skin and subcutaneous tissue                |
| 43 | A170z00 | Tuberculosis of skin and subcutaneous tissue NOS            |
| 44 | A3A0500 | Gas gangrene                                                |
| 45 | A3A0600 | Gas gangrene-neck                                           |
| 46 | A3A0700 | Gas gangrene-back                                           |
| 47 | A3A0800 | Gas gangrene-shoulder                                       |
| 48 | A3A0900 | Gas gangrene-arm                                            |
| 49 | A3A0A00 | Gas gangrene-forearm                                        |
| 50 | A3A0B00 | Gas gangrene-hand                                           |
| 51 | A3A0C00 | Gas gangrene-pelvis                                         |
| 52 |         |                                                             |
| 53 |         |                                                             |
| 54 |         |                                                             |
| 55 |         |                                                             |
| 56 |         |                                                             |
| 57 |         |                                                             |
| 58 |         |                                                             |
| 59 |         |                                                             |
| 60 |         |                                                             |

|    |         |                                                       |
|----|---------|-------------------------------------------------------|
| 1  |         |                                                       |
| 2  | A3A0D00 | Gas gangrene-thigh                                    |
| 3  | A3A0E00 | Gas gangrene-leg                                      |
| 4  | A3A0F00 | Gas gangrene-foot                                     |
| 5  | A3A0z00 | Gas gangrene caused by organism NOS                   |
| 6  | A851000 | Aleppo boil                                           |
| 7  | A851100 | Baghdad boil                                          |
| 8  | A851200 | Delhi boil                                            |
| 9  |         |                                                       |
| 10 | A851z00 | Urban cutaneous leishmaniasis NOS                     |
| 11 | A852.00 | Asian desert cutaneous leishmaniasis                  |
| 12 | A853.00 | Ethiopian cutaneous leishmaniasis                     |
| 13 | A854.00 | American cutaneous leishmaniasis                      |
| 14 | A854.11 | Chiclero ulcer                                        |
| 15 | A855.00 | American mucocutaneous leishmaniasis                  |
| 16 | A85z.00 | Leishmaniasis NOS                                     |
| 17 | A86..00 | Trypanosomiasis                                       |
| 18 |         |                                                       |
| 19 | AD40000 | Cutaneous myiasis                                     |
| 20 | AD40100 | Wound myiasis                                         |
| 21 |         |                                                       |
| 22 | C107.11 | Diabetes mellitus with gangrene                       |
| 23 | C107.12 | Diabetes with gangrene                                |
| 24 | C107200 | Diabetes mellitus, adult with gangrene                |
| 25 | C108500 | Insulin dependent diabetes mellitus with ulcer        |
| 26 | C108511 | Type I diabetes mellitus with ulcer                   |
| 27 | C108512 | Type 1 diabetes mellitus with ulcer                   |
| 28 |         |                                                       |
| 29 | C108600 | Insulin dependent diabetes mellitus with gangrene     |
| 30 | C108611 | Type I diabetes mellitus with gangrene                |
| 31 | C108612 | Type 1 diabetes mellitus with gangrene                |
| 32 | C109400 | Non-insulin dependent diabetes mellitus with ulcer    |
| 33 | C109411 | Type II diabetes mellitus with ulcer                  |
| 34 | C109412 | Type 2 diabetes mellitus with ulcer                   |
| 35 | C109500 | Non-insulin dependent diabetes mellitus with gangrene |
| 36 | C109511 | Type II diabetes mellitus with gangrene               |
| 37 | C109512 | Type 2 diabetes mellitus with gangrene                |
| 38 |         |                                                       |
| 39 | C10E500 | Type 1 diabetes mellitus with ulcer                   |
| 40 | C10E511 | Type I diabetes mellitus with ulcer                   |
| 41 | C10E512 | Insulin dependent diabetes mellitus with ulcer        |
| 42 | C10E600 | Type 1 diabetes mellitus with gangrene                |
| 43 | C10E611 | Type I diabetes mellitus with gangrene                |
| 44 | C10E612 | Insulin dependent diabetes mellitus with gangrene     |
| 45 | C10F400 | Type 2 diabetes mellitus with ulcer                   |
| 46 | C10F411 | Type II diabetes mellitus with ulcer                  |
| 47 | C10F500 | Type 2 diabetes mellitus with gangrene                |
| 48 | C10F511 | Type II diabetes mellitus with gangrene               |
| 49 |         |                                                       |
| 50 | F506.00 | Abscess of external ear                               |
| 51 | G732.00 | Peripheral gangrene                                   |
| 52 | G732000 | Gangrene of toe                                       |
| 53 | G732100 | Gangrene of foot                                      |
| 54 | G732200 | Gangrene of finger                                    |
| 55 | G732300 | Gangrene of thumb                                     |
| 56 | G732400 | Gangrene of hand                                      |
| 57 |         |                                                       |
| 58 | G830.00 | Varicose veins of the leg with ulcer                  |
| 59 |         |                                                       |
| 60 |         |                                                       |

|    |         |                                                              |
|----|---------|--------------------------------------------------------------|
| 1  |         |                                                              |
| 2  | G832.00 | Varicose veins of the leg with ulcer and eczema              |
| 3  | G835.00 | Infected varicose ulcer                                      |
| 4  | G837.00 | Venous ulcer of leg                                          |
| 5  | J085000 | Abscess of lip                                               |
| 6  | J085800 | Lip ulcer                                                    |
| 7  | J54..00 | Abscess of anal and rectal regions                           |
| 8  | J54..12 | Rectal abscess                                               |
| 9  | J540.00 | Perianal abscess                                             |
| 10 | J540.11 | Perianal cellulitis                                          |
| 11 | J541.00 | Ischiorectal abscess                                         |
| 12 | J542.00 | Submucous ano-rectal abscess                                 |
| 13 | J543.00 | Pelvi-rectal abscess                                         |
| 14 | J544.00 | Ano-rectal fissure abscess                                   |
| 15 | J545.00 | Intrasphincteric abscess                                     |
| 16 | J546.00 | Rectal abscess                                               |
| 17 | J54z.00 | Ano-rectal abscess NOS                                       |
| 18 | K272000 | Penile abscess                                               |
| 19 | K272100 | Penile boil                                                  |
| 20 | K272200 | Penile carbuncle                                             |
| 21 | K272300 | Cellulitis of penis                                          |
| 22 | K27y500 | Chronic ulcer of penis                                       |
| 23 | K284600 | Fournier's gangrene of scrotum                               |
| 24 | K424000 | Abscess of vulva                                             |
| 25 | K424011 | Abscess of labia                                             |
| 26 | K424100 | Carbuncle of vulva                                           |
| 27 | K424111 | Boil of vulva                                                |
| 28 | K424200 | Furuncle of vulva                                            |
| 29 | K424z00 | Other abscess of vulva NOS                                   |
| 30 | K425.00 | Ulceration of vulva                                          |
| 31 | K425000 | Ulceration of vulva unspecified                              |
| 32 | K425100 | Ulceration of vulva in diseases EC                           |
| 33 | K425200 | Ulceration of vulva in Behcet's disease                      |
| 34 | K425z00 | Ulceration of vulva NOS                                      |
| 35 | L394500 | Infection of obstetric surgical wound                        |
| 36 | L441.00 | Caesarean wound disruption                                   |
| 37 | L441000 | Caesarean wound disruption unspecified                       |
| 38 | L441100 | Caesarean wound disruption - delivered with p/n complication |
| 39 | L441200 | Caesarean wound disruption with postnatal complication       |
| 40 | L441z00 | Caesarean wound disruption NOS                               |
| 41 | L442.00 | Obstetric perineal wound disruption                          |
| 42 | L442.11 | Breakdown of perineum                                        |
| 43 | L442.12 | Episiotomy breakdown                                         |
| 44 | L442000 | Obstetric perineal wound disruption unspecified              |
| 45 | L442100 | Obstetric perineal wound disruption - deliv + p/n comp       |
| 46 | L442200 | Obstetric perineal wound disruption with p/n complication    |
| 47 | L442z00 | Obstetric perineal wound disruption NOS                      |
| 48 | L443.00 | Other complication of obstetric surgical wound               |
| 49 | L443.11 | Haematoma - perineal wound                                   |
| 50 | L443.12 | Infection - perineal wound                                   |
| 51 | L443000 | Other complication of obstetric surgical wound unspecified   |
| 52 |         |                                                              |
| 53 |         |                                                              |
| 54 |         |                                                              |
| 55 |         |                                                              |
| 56 |         |                                                              |
| 57 |         |                                                              |
| 58 |         |                                                              |
| 59 |         |                                                              |
| 60 |         |                                                              |

|    |         |                                                              |
|----|---------|--------------------------------------------------------------|
| 1  |         |                                                              |
| 2  | L443100 | Other complication obstetric surg wound -delivered +p/n comp |
| 3  | L443200 | Other complication obstetric surgical wound with p/n comp    |
| 4  | L443z00 | Other complication of obstetric surgical wound NOS           |
| 5  | L45..00 | Obstetric breast infections                                  |
| 6  | L450.00 | Obstetric nipple infection                                   |
| 7  | L450.11 | Abscess of nipple - obstetric                                |
| 8  | L450.12 | Nipple infection - obstetric                                 |
| 9  | L450000 | Obstetric nipple infection unspecified                       |
| 10 | L450100 | Obstetric nipple infection - delivered                       |
| 11 | L450200 | Obstetric nipple infection - delivered with p/n complication |
| 12 | L450300 | Obstetric nipple infection with antenatal complication       |
| 13 | L450400 | Obstetric nipple infection with postnatal complication       |
| 14 | L450z00 | Obstetric nipple infection NOS                               |
| 15 | L451.00 | Obstetric breast abscess                                     |
| 16 | L451.11 | Purulent mastitis - obstetric                                |
| 17 | L451000 | Obstetric breast abscess unspecified                         |
| 18 | L451100 | Obstetric breast abscess - delivered                         |
| 19 | L451200 | Obstetric breast abscess - deliv with postnatal complication |
| 20 | L451300 | Obstetric breast abscess with antenatal complication         |
| 21 | L451400 | Obstetric breast abscess with postnatal complication         |
| 22 | L451z00 | Obstetric breast abscess NOS                                 |
| 23 | Lyu6A00 | [X]Infection of caesarean section wound following delivery   |
| 24 | M....00 | Skin and subcutaneous tissue diseases                        |
| 25 | M0...00 | Skin and subcutaneous tissue infections                      |
| 26 | M00..00 | Carbuncle                                                    |
| 27 | M000.00 | Carbuncle of face                                            |
| 28 | M000000 | Carbuncle of ear                                             |
| 29 | M000100 | Carbuncle of face (excluding eye)                            |
| 30 | M000200 | Carbuncle of nasal septum                                    |
| 31 | M000300 | Carbuncle of temple region                                   |
| 32 | M000z00 | Carbuncle of face NOS                                        |
| 33 | M001.00 | Carbuncle of neck                                            |
| 34 | M002.00 | Carbuncle of trunk                                           |
| 35 | M002000 | Carbuncle of chest wall                                      |
| 36 | M002100 | Carbuncle of breast                                          |
| 37 | M002200 | Carbuncle of back                                            |
| 38 | M002300 | Carbuncle of abdominal wall                                  |
| 39 | M002400 | Carbuncle of umbilicus                                       |
| 40 | M002500 | Carbuncle of flank                                           |
| 41 | M002600 | Carbuncle of groin                                           |
| 42 | M002700 | Carbuncle of perineum                                        |
| 43 | M002z00 | Carbuncle of trunk NOS                                       |
| 44 | M003.00 | Carbuncle of upper arm and forearm                           |
| 45 | M003000 | Carbuncle of shoulder                                        |
| 46 | M003100 | Carbuncle of axilla                                          |
| 47 | M003200 | Carbuncle of upper arm                                       |
| 48 | M003300 | Carbuncle of elbow                                           |
| 49 | M003400 | Carbuncle of forearm                                         |
| 50 | M003z00 | Carbuncle of upper arm and forearm NOS                       |
| 51 | M004.00 | Carbuncle of hand                                            |
| 52 |         |                                                              |
| 53 |         |                                                              |
| 54 |         |                                                              |
| 55 |         |                                                              |
| 56 |         |                                                              |
| 57 |         |                                                              |
| 58 |         |                                                              |
| 59 |         |                                                              |
| 60 |         |                                                              |

|    |         |                                       |
|----|---------|---------------------------------------|
| 1  |         |                                       |
| 2  | M004000 | Carbuncle of wrist                    |
| 3  | M004100 | Carbuncle of thumb                    |
| 4  | M004200 | Carbuncle of finger                   |
| 5  | M004z00 | Carbuncle of hand NOS                 |
| 6  | M005.00 | Carbuncle of buttock                  |
| 7  | M005000 | Carbuncle of anus                     |
| 8  | M005100 | Carbuncle of gluteal region           |
| 9  | M005z00 | Carbuncle of buttock NOS              |
| 10 | M006.00 | Carbuncle of leg (excluding foot)     |
| 11 | M006000 | Carbuncle of hip                      |
| 12 | M006100 | Carbuncle of thigh                    |
| 13 | M006200 | Carbuncle of knee                     |
| 14 | M006300 | Carbuncle of lower leg                |
| 15 | M006400 | Carbuncle of ankle                    |
| 16 | M006z00 | Carbuncle of leg (excluding foot) NOS |
| 17 | M007.00 | Carbuncle of foot                     |
| 18 | M007000 | Carbuncle of foot unspecified         |
| 19 | M007100 | Carbuncle of heel                     |
| 20 | M007200 | Carbuncle of toe                      |
| 21 | M007z00 | Carbuncle of foot NOS                 |
| 22 | M00y.00 | Carbuncle of other specified site     |
| 23 | M00y000 | Carbuncle of head (excluding face)    |
| 24 | M00yz00 | Carbuncle of other specified site NOS |
| 25 | M00z.00 | Carbuncle NOS                         |
| 26 | M01..00 | Furuncle - boil                       |
| 27 | M010.00 | Boil of face                          |
| 28 | M010000 | Boil of ear                           |
| 29 | M010100 | Boil of face (excluding eye)          |
| 30 | M010200 | Boil of nasal septum                  |
| 31 | M010300 | Boil of temple region                 |
| 32 | M010400 | Boil of external nose                 |
| 33 | M010z00 | Boil of face NOS                      |
| 34 | M011.00 | Boil of neck                          |
| 35 | M012.00 | Boil of trunk                         |
| 36 | M012000 | Boil of chest wall                    |
| 37 | M012100 | Boil of breast                        |
| 38 | M012200 | Boil of back                          |
| 39 | M012300 | Boil of abdominal wall                |
| 40 | M012400 | Boil of umbilicus                     |
| 41 | M012500 | Boil of flank                         |
| 42 | M012600 | Boil of groin                         |
| 43 | M012700 | Boil of perineum                      |
| 44 | M012z00 | Boil of trunk NOS                     |
| 45 | M013.00 | Boil of upper arm and forearm         |
| 46 | M013000 | Boil of shoulder                      |
| 47 | M013100 | Boil of axilla                        |
| 48 | M013200 | Boil of upper arm                     |
| 49 | M013300 | Boil of elbow                         |
| 50 | M013400 | Boil of forearm                       |
| 51 | M013z00 | Boil of upper arm and forearm NOS     |
| 52 |         |                                       |
| 53 |         |                                       |
| 54 |         |                                       |
| 55 |         |                                       |
| 56 |         |                                       |
| 57 |         |                                       |
| 58 |         |                                       |
| 59 |         |                                       |
| 60 |         |                                       |

|    |         |                                              |
|----|---------|----------------------------------------------|
| 1  |         |                                              |
| 2  | M014.00 | Boil of hand                                 |
| 3  | M014000 | Boil of wrist                                |
| 4  | M014100 | Boil of thumb                                |
| 5  | M014200 | Boil of finger                               |
| 6  | M014z00 | Boil of hand NOS                             |
| 7  | M015.00 | Boil of buttock                              |
| 8  | M015000 | Boil of anus                                 |
| 9  | M015100 | Boil of gluteal region                       |
| 10 | M015z00 | Boil of buttock NOS                          |
| 11 | M016.00 | Boil of leg (excluding foot)                 |
| 12 | M016000 | Boil of hip                                  |
| 13 | M016100 | Boil of thigh                                |
| 14 | M016200 | Boil of knee                                 |
| 15 | M016300 | Boil of lower leg                            |
| 16 | M016400 | Boil of ankle                                |
| 17 | M016z00 | Boil of leg (excluding foot) NOS             |
| 18 | M017.00 | Boil of foot                                 |
| 19 | M017000 | Boil of foot unspecified                     |
| 20 | M017100 | Boil of heel                                 |
| 21 | M017200 | Boil of toe                                  |
| 22 | M017z00 | Boil of foot NOS                             |
| 23 | M01y.00 | Boil of other specified site                 |
| 24 | M01y000 | Boil of head (excluding face)                |
| 25 | M01yz00 | Boil of other specified site NOS             |
| 26 | M01z.00 | Boil NOS                                     |
| 27 | M01z.11 | Recurrent boils                              |
| 28 | M01z.12 | Boils of multiple sites                      |
| 29 | M01z000 | Multiple boils                               |
| 30 | M02.00  | Cellulitis and abscess of finger and toe     |
| 31 | M020.00 | Cellulitis and abscess of finger             |
| 32 | M020000 | Cellulitis and abscess of finger unspecified |
| 33 | M020100 | Finger pulp abscess                          |
| 34 | M020111 | Felon                                        |
| 35 | M020112 | Whitlow                                      |
| 36 | M020200 | Onychia of finger                            |
| 37 | M020300 | Paronychia of finger                         |
| 38 | M020311 | Perionychia of finger                        |
| 39 | M020400 | Finger web space infection                   |
| 40 | M020500 | Pulp space infection of finger/thumb         |
| 41 | M020z00 | Cellulitis and abscess of finger NOS         |
| 42 | M021.00 | Cellulitis and abscess of toe                |
| 43 | M021000 | Cellulitis and abscess of toe unspecified    |
| 44 | M021100 | Onychia of toe                               |
| 45 | M021200 | Paronychia of toe                            |
| 46 | M021300 | Pulp space infection of toe                  |
| 47 | M021z00 | Cellulitis and abscess of toe NOS            |
| 48 | M021z11 | Perionychia of toe                           |
| 49 | M02z.00 | Cellulitis and abscess of digit NOS          |
| 50 | M02z.11 | Nail infection NOS                           |
| 51 | M02z.12 | Paronychia                                   |
| 52 |         |                                              |
| 53 |         |                                              |
| 54 |         |                                              |
| 55 |         |                                              |
| 56 |         |                                              |
| 57 |         |                                              |
| 58 |         |                                              |
| 59 |         |                                              |
| 60 |         |                                              |



|    |         |                                                             |
|----|---------|-------------------------------------------------------------|
| 1  |         |                                                             |
| 2  | M02z.13 | Infected nailfold                                           |
| 3  | M02z.14 | Nailfold infected                                           |
| 4  | M03..00 | Other cellulitis and abscess                                |
| 5  | M03..11 | Abscess of skin area excluding digits of hand or foot       |
| 6  | M03..12 | Acute lymphangitis of skin excluding digits of hand or foot |
| 7  | M03..13 | Cellulitis of skin area excluding digits of hand or foot    |
| 8  | M030.00 | Cellulitis and abscess of face                              |
| 9  | M030000 | Cellulitis and abscess of cheek (external)                  |
| 10 | M030011 | Cellulitis and abscess of cheek                             |
| 11 | M030100 | Cellulitis and abscess of nose (external)                   |
| 12 | M030111 | Cellulitis and abscess of nose                              |
| 13 | M030200 | Cellulitis and abscess of chin                              |
| 14 | M030300 | Cellulitis and abscess of submandibular region              |
| 15 | M030400 | Cellulitis and abscess of forehead                          |
| 16 | M030500 | Cellulitis and abscess of temple region                     |
| 17 | M030600 | Cellulitis of face                                          |
| 18 | M030z00 | Cellulitis and abscess of face NOS                          |
| 19 | M031.00 | Cellulitis and abscess of neck                              |
| 20 | M031.11 | Cervical abscess                                            |
| 21 | M032.00 | Cellulitis and abscess of trunk                             |
| 22 | M032000 | Cellulitis and abscess of chest wall                        |
| 23 | M032100 | Cellulitis and abscess of breast                            |
| 24 | M032200 | Cellulitis and abscess of back                              |
| 25 | M032300 | Cellulitis and abscess of abdominal wall                    |
| 26 | M032400 | Cellulitis and abscess of umbilicus                         |
| 27 | M032500 | Cellulitis and abscess of flank                             |
| 28 | M032600 | Cellulitis and abscess of groin                             |
| 29 | M032700 | Cellulitis and abscess of perineum                          |
| 30 | M032800 | Cellulitis of trunk                                         |
| 31 | M032z00 | Cellulitis and abscess of trunk NOS                         |
| 32 | M033.00 | Cellulitis and abscess of arm                               |
| 33 | M033000 | Cellulitis and abscess of shoulder                          |
| 34 | M033100 | Cellulitis and abscess of axilla                            |
| 35 | M033200 | Cellulitis and abscess of upper arm                         |
| 36 | M033300 | Cellulitis and abscess of elbow                             |
| 37 | M033400 | Cellulitis and abscess of forearm                           |
| 38 | M033z00 | Cellulitis and abscess of arm NOS                           |
| 39 | M034.00 | Cellulitis and abscess of hand excluding digits             |
| 40 | M034.11 | Cellulitis and abscess of hand                              |
| 41 | M034000 | Cellulitis and abscess of hand unspecified                  |
| 42 | M034011 | Abscess of dorsum of hand                                   |
| 43 | M034012 | Abscess of palm of hand                                     |
| 44 | M034013 | Cellulitis of dorsum of hand                                |
| 45 | M034014 | Cellulitis of palm of hand                                  |
| 46 | M034100 | Cellulitis and abscess of wrist                             |
| 47 | M034z00 | Cellulitis and abscess of hand NOS                          |
| 48 | M035.00 | Cellulitis and abscess of buttock                           |
| 49 | M036.00 | Cellulitis and abscess of leg excluding foot                |
| 50 | M036.11 | Cellulitis and abscess of leg                               |
| 51 | M036000 | Cellulitis and abscess of hip                               |
| 52 |         |                                                             |
| 53 |         |                                                             |
| 54 |         |                                                             |
| 55 |         |                                                             |
| 56 |         |                                                             |
| 57 |         |                                                             |
| 58 |         |                                                             |
| 59 |         |                                                             |
| 60 |         |                                                             |



|    |         |                                                        |
|----|---------|--------------------------------------------------------|
| 1  |         |                                                        |
| 2  | M036100 | Cellulitis and abscess of thigh                        |
| 3  | M036200 | Cellulitis and abscess of knee                         |
| 4  | M036300 | Cellulitis and abscess of lower leg                    |
| 5  | M036400 | Cellulitis and abscess of ankle                        |
| 6  | M036z00 | Cellulitis and abscess of leg NOS                      |
| 7  |         |                                                        |
| 8  | M037.00 | Cellulitis and abscess of foot excluding toe           |
| 9  | M037.11 | Cellulitis and abscess of foot                         |
| 10 |         |                                                        |
| 11 | M037000 | Cellulitis and abscess of foot unspecified             |
| 12 | M037100 | Cellulitis and abscess of heel                         |
| 13 | M037200 | Cellulitis in diabetic foot                            |
| 14 | M037z00 | Cellulitis and abscess of foot NOS                     |
| 15 | M038.00 | Cellulitis of external ear                             |
| 16 | M03y.00 | Other specified cellulitis and abscess                 |
| 17 | M03y000 | Cellulitis and abscess of head unspecified             |
| 18 | M03y011 | Abscess of scalp                                       |
| 19 |         |                                                        |
| 20 | M03z.00 | Cellulitis and abscess NOS                             |
| 21 | M03z000 | Cellulitis NOS                                         |
| 22 | M03z100 | Abscess NOS                                            |
| 23 |         |                                                        |
| 24 | M03zz00 | Cellulitis and abscess NOS                             |
| 25 | M060.00 | Pilonidal cyst with abscess                            |
| 26 | M061.00 | Pilonidal cyst with no abscess                         |
| 27 | M061.11 | Dermal sinus                                           |
| 28 |         |                                                        |
| 29 | M062.00 | Pilonidal sinus with abscess                           |
| 30 | M063.00 | Pilonidal sinus without abscess                        |
| 31 | M06z.00 | Pilonidal sinus/cyst NOS                               |
| 32 | M07..00 | Other local infections of skin and subcutaneous tissue |
| 33 | M070200 | Pyoderma gangrenosum                                   |
| 34 | M070300 | Pyoderma ulcerosum tropicalum                          |
| 35 | M07y.00 | Local infection of skin or subcutaneous tissue OS      |
| 36 | M07yz00 | Other spec local skin/subc infection NOS               |
| 37 |         |                                                        |
| 38 | M07yz11 | Infection toe                                          |
| 39 | M07yz12 | Infection foot                                         |
| 40 | M07yz13 | Infection finger                                       |
| 41 |         |                                                        |
| 42 | M07z.00 | Local infection skin/subcut tissue NOS                 |
| 43 | M07z.11 | Infected wound from insect bite                        |
| 44 | M07z.12 | Infected skin ulcer                                    |
| 45 | M07z.13 | Septic spots                                           |
| 46 | M07z.14 | Infected dermatitis                                    |
| 47 |         |                                                        |
| 48 | M07z000 | Infection foot                                         |
| 49 | M07z100 | Infection toe                                          |
| 50 | M07z200 | Infection finger                                       |
| 51 | M09..00 | Cutaneous abscess                                      |
| 52 | M090.00 | [X]Abscess of face                                     |
| 53 | M091.00 | [X]Abscess of neck                                     |
| 54 | M092.00 | [X]Abscess of trunk                                    |
| 55 |         |                                                        |
| 56 | M092000 | [X]Abscess of buttock                                  |
| 57 | M092100 | [X]Abdominal wall abscess                              |
| 58 | M092200 | [X]Perineal abscess                                    |
| 59 | M093.00 | [X]Abscess of buttock                                  |
| 60 | M094.00 | [X]Abscess of limb                                     |

|    |         |                                                              |
|----|---------|--------------------------------------------------------------|
| 1  |         |                                                              |
| 2  | M094000 | [X]Abscess of axilla                                         |
| 3  | M095.00 | Skin abscess                                                 |
| 4  | M09y.00 | [X]Abscess of other site                                     |
| 5  | M0y..00 | Other specified infections of skin or subcutaneous tissue    |
| 6  | M0z..00 | Skin and subcut tissue infection NOS                         |
| 7  | M0z..11 | Infected sebaceous cyst                                      |
| 8  | M1...00 | Other skin and subcutaneous tissue inflammatory conditions   |
| 9  | M2...00 | Other skin and subcutaneous tissue disorders                 |
| 10 |         |                                                              |
| 11 | M27..00 | Chronic skin ulcer                                           |
| 12 | M270.00 | Decubitus (pressure) ulcer                                   |
| 13 |         |                                                              |
| 14 | M270.11 | Bed sore                                                     |
| 15 | M270.12 | Plaster ulcer                                                |
| 16 | M270.13 | Pressure sore                                                |
| 17 | M270.14 | Decubitus ulcer and pressure area                            |
| 18 | M270000 | Hospital acquired pressure ulcer                             |
| 19 |         |                                                              |
| 20 | M270100 | Nursing home acquired pressure ulcer                         |
| 21 | M270200 | Community hospital acquired pressure ulcer                   |
| 22 | M270300 | Hospice acquired pressure ulcer                              |
| 23 |         |                                                              |
| 24 | M270400 | Stage I decubitus ulcer and pressure area                    |
| 25 | M270500 | Stage II decubitus ulcer                                     |
| 26 | M270600 | Stage III decubitus ulcer                                    |
| 27 | M270700 | Stage IV decubitus ulcer                                     |
| 28 |         |                                                              |
| 29 | M270z00 | Decubitus ulcer and pressure area NOS                        |
| 30 | M271.00 | Non-pressure ulcer lower limb                                |
| 31 | M271.11 | Foot ulcer                                                   |
| 32 | M271.12 | Ischaemic leg ulcer                                          |
| 33 | M271.13 | Leg ulcer NOS                                                |
| 34 |         |                                                              |
| 35 | M271.14 | Neurogenic leg ulcer                                         |
| 36 | M271.15 | Trophic leg ulcer                                            |
| 37 | M271000 | Ischaemic ulcer diabetic foot                                |
| 38 | M271100 | Neuropathic diabetic ulcer - foot                            |
| 39 | M271200 | Mixed diabetic ulcer - foot                                  |
| 40 |         |                                                              |
| 41 | M271300 | Arterial leg ulcer                                           |
| 42 | M271400 | Mixed venous and arterial leg ulcer                          |
| 43 | M271500 | Venous ulcer of leg                                          |
| 44 | M271600 | Traumatic leg ulcer                                          |
| 45 | M271700 | Neuropathic foot ulcer                                       |
| 46 |         |                                                              |
| 47 | M272.00 | Ulcer of skin                                                |
| 48 | M273.00 | Non-healing leg ulcer                                        |
| 49 | M274.00 | Recurrent leg ulcer                                          |
| 50 | M27y.00 | Chronic ulcer of skin, other specified sites                 |
| 51 | M27z.00 | Chronic skin ulcer NOS                                       |
| 52 |         |                                                              |
| 53 | M2y4D00 | Macerated perianal skin                                      |
| 54 | M2yA.00 | Skin sinus                                                   |
| 55 | M2yB.00 | Fistula of skin                                              |
| 56 | M2yz.11 | Skin lesion                                                  |
| 57 |         |                                                              |
| 58 | M2z0.00 | Skin lesion                                                  |
| 59 | Myu0.00 | [X]Infections of the skin and subcutaneous tissue            |
| 60 | Myu0100 | [X]Other specified local infections/skin+subcutaneous tissue |
|    | R153300 | [D]Positive culture findings in wound                        |

|    |         |                                                              |
|----|---------|--------------------------------------------------------------|
| 1  |         |                                                              |
| 2  | S002.00 | Open fracture vault of skull without intracranial injury     |
| 3  | S002000 | Open #skull vlt no intracranial injury, unspec state consc   |
| 4  | S002100 | Open #skull vlt no intracranial injury, no loss of consc     |
| 5  | S002200 | Open #skull vlt no intracranial injury, <1hr loss of consc   |
| 6  | S002300 | Open #skull vlt no intracranial injury, 1-24hr loss of consc |
| 7  | S002400 | Open #skull vlt no intracranial injury, >24hr LOC+recovery   |
| 8  | S002500 | Open #skull vlt no intracranial inj, >24hr LOC not restored  |
| 9  | S002600 | Open #skull vlt no intracranial injury, LOC unspec duration  |
| 10 | S002z00 | Open #skull vlt no intracranial injury + concussion unspec   |
| 11 | S003.00 | Open fracture vault of skull with intracranial injury        |
| 12 | S003000 | Open #skull vlt + intracranial injury, unspec state of consc |
| 13 | S003100 | Open #skull vlt + intracranial injury, no loss of consc      |
| 14 | S003200 | Open #skull vlt + intracranial injury, <1hr loss of consc    |
| 15 | S003300 | Open #skull vlt + intracranial injury, 1-24hr loss of consc  |
| 16 | S003400 | Open #skull vlt + intracranial injury, >24hr LOC + recovery  |
| 17 | S003500 | Open #skull vlt + intracranial inj, >24hr LOC not restored   |
| 18 | S003600 | Open #skull vlt + intracranial injury, LOC unspec duration   |
| 19 | S003z00 | Open #skull vlt with intracranial injury + concussion unspec |
| 20 | S012.00 | Open fracture base skull without mention intracranial injury |
| 21 | S012000 | Open #skull bse no intracranial inj, unspec state of consc   |
| 22 | S012100 | Open #skull bse no intracranial injury, no loss of consc     |
| 23 | S012200 | Open #skull bse no intracranial injury, <1hr loss of consc   |
| 24 | S012300 | Open #skull bse no intracranial injury, 1-24hr loss of consc |
| 25 | S012400 | Open #skull bse no intracranial injury, >24hr LOC+recovery   |
| 26 | S012500 | Open #skull bse no intracranial inj, >24hr LOC not restored  |
| 27 | S012600 | Open #skull bse no intracranial injury, LOC unspec duration  |
| 28 | S012z00 | Open #skull bse no intracranial injury + concussion unspec   |
| 29 | S013.00 | Open fracture base of skull with intracranial injury         |
| 30 | S013000 | Open #skull bse + intracranial injury, unspec state of consc |
| 31 | S013100 | Open #skull bse + intracranial injury, no loss of consc      |
| 32 | S013200 | Open #skull bse + intracranial injury, <1hr loss of consc    |
| 33 | S013300 | Open #skull bse + intracranial injury, 1-24hr loss of consc  |
| 34 | S013400 | Open #skull bse + intracranial injury, >24hr LOC + recovery  |
| 35 | S013500 | Open #skull bse + intracranial inj, >24hr LOC not restored   |
| 36 | S013600 | Open #skull bse + intracranial injury, LOC unspec duration   |
| 37 | S013z00 | Open #skull bse + intracranial injury + concussion unspec    |
| 38 | S032.00 | Open #skull NOS without mention of intracranial injury       |
| 39 | S032000 | Open #skull NOS no intracranial inj, unspec state of consc   |
| 40 | S032100 | Open #skull NOS no intracranial inj, no loss of consc        |
| 41 | S032200 | Open #skull NOS no intracranial inj, <1hr loss of consc      |
| 42 | S032300 | Open #skull NOS no intracranial inj, 1-24hrs loss of consc   |
| 43 | S032400 | Open #skull NOS no intracranial inj, >24hrs LOC + recovery   |
| 44 | S032500 | Open #skull NOS no intracranial inj, >24hrs LOC not restored |
| 45 | S032600 | Open #skull NOS no intracranial inj, LOC unspec duration     |
| 46 | S032z00 | Open #skull NOS no intracranial inj + concussion unspec      |
| 47 | S033.00 | Open fracture of skull NOS with intracranial injury          |
| 48 | S033000 | Open #skull NOS + intracranial inj, unspec state of consc    |
| 49 | S033100 | Open #skull NOS + intracranial inj, no loss of consc         |
| 50 | S033200 | Open #skull NOS + intracranial inj, <1hr loss of consc       |
| 51 | S033300 | Open #skull NOS + intracranial inj, 1-24hrs loss of consc    |
| 52 |         |                                                              |
| 53 |         |                                                              |
| 54 |         |                                                              |
| 55 |         |                                                              |
| 56 |         |                                                              |
| 57 |         |                                                              |
| 58 |         |                                                              |
| 59 |         |                                                              |
| 60 |         |                                                              |

|    |         |                                                              |
|----|---------|--------------------------------------------------------------|
| 1  |         |                                                              |
| 2  | S033400 | Open #skull NOS + intracranial inj, >24hrs LOC + recovery    |
| 3  | S033500 | Open #skull NOS + intracranial inj, >24hrs LOC not restored  |
| 4  | S033600 | Open #skull NOS + intracranial inj, LOC unspec duration      |
| 5  | S033z00 | Open #skull NOS + intracranial inj + concussion unspec       |
| 6  | S042000 | Open #skull/face, mult, no intracranial inj, unspec consc    |
| 7  | S042100 | Open #skull/face, mult, no intracranial inj, no loss consc   |
| 8  | S042200 | Open #skull/face, mult, no intracranial inj, <1hr LOC        |
| 9  |         |                                                              |
| 10 | S042300 | Open #skull/face, mult, no intracranial inj, 1-24hrs LOC     |
| 11 | S042400 | Open #skull/face, mult, no intracran inj, >24hr LOC+recovery |
| 12 | S042500 | Open #skull/face,mult,no intracran inj,>24hr LOC no restored |
| 13 |         |                                                              |
| 14 | S042600 | Open #skull/face,mult,no intracran inj, LOC unspec duration  |
| 15 | S042z00 | Open #skull/face,mult,no intracran inj, concussion unspec    |
| 16 | S043.00 | Mult #skull/face + other bones, open + intracranial injury   |
| 17 | S043000 | Open #skull/face, mult + intracranial inj, unspec consc      |
| 18 | S043100 | Open #skull/face, mult + intracranial inj, no loss consc     |
| 19 |         |                                                              |
| 20 | S043200 | Open #skull/face, mult + intracranial inj, <1hr LOC          |
| 21 | S043300 | Open #skull/face, mult + intracranial inj, 1-24hrs LOC       |
| 22 | S043400 | Open #skull/face, mult + intracran inj, >24hr LOC + recovery |
| 23 | S043500 | Open #skull/face,mult + intracran inj, >24hr LOC no restored |
| 24 |         |                                                              |
| 25 | S043600 | Open #skull/face, mult + intracran inj, LOC unspec duration  |
| 26 | S043z00 | Open #skull/face, mult + intracran inj + concussion, unspec  |
| 27 | S611000 | Cortex cont + open intracranial wound + unspec state consc   |
| 28 | S611100 | Cortex cont + open intracranial wound + no loss of consc     |
| 29 | S611200 | Cortex cont + open intracranial wound + <1hr loss of consc   |
| 30 | S611300 | Cortex cont + open intracranial wound + 1-24hr loss of consc |
| 31 | S611400 | Cortex cont + open intracranial wnd + >24hr LOC + recovery   |
| 32 | S611500 | Cortex cont + open intracranial wnd + >24hr LOC not restored |
| 33 |         |                                                              |
| 34 | S611600 | Cortex cont + open intracranial wnd + LOC unspec duration    |
| 35 | S611z00 | Cortex cont + open intracranial wound + concussion unspec    |
| 36 | S613.00 | Cortex laceration with open intracranial wound               |
| 37 | S613000 | Cortex lacn + open intracranial wound + unspec state consc   |
| 38 | S613100 | Cortex lacn + open intracranial wound + no loss of consc     |
| 39 | S613200 | Cortex lacn + open intracranial wound + <1hr loss of consc   |
| 40 | S613300 | Cortex lacn + open intracranial wound + 1-24hr loss of consc |
| 41 | S613400 | Cortex lacn + open intracranial wound + >24hr LOC + recovery |
| 42 | S613500 | Cortex lacn + open intracranial wnd + >24hr LOC not restored |
| 43 |         |                                                              |
| 44 | S613600 | Cortex lacn + open intracranial wnd + LOC unspec duration    |
| 45 | S613z00 | Cortex lacn + open intracranial wound + concussion unspec    |
| 46 | S615000 | Hind brain cont + open intracranial wnd + unspec state consc |
| 47 | S615100 | Hind brain cont + open intracranial wound + no loss consc    |
| 48 | S615200 | Hind brain cont + open intracranial wound + <1hr loss consc  |
| 49 | S615300 | Hind brain cont + open intracranial wnd + 1-24hr loss consc  |
| 50 | S615400 | Hind brain cont + open intracranial wnd +>24hr LOC +recovery |
| 51 | S615500 | Hind brain cont + open intracran wnd +>24hr LOC not restored |
| 52 |         |                                                              |
| 53 | S615600 | Hind brain cont + open intracranial wnd +LOC unspec duration |
| 54 | S615z00 | Hind brain cont + open intracranial wnd + concussion unspec  |
| 55 | S617.00 | Hind brain laceration with open intracranial wound           |
| 56 | S617000 | Hind brain lacn + open intracranial wnd + unspec state consc |
| 57 | S617100 | Hind brain lacn + open intracranial wnd + no loss consc      |
| 58 | S617200 | Hind brain lacn + open intracranial wnd + <1hr loss consc    |
| 59 |         |                                                              |
| 60 |         |                                                              |

1  
2  
3  
4  
5  
6  
7  
8  
9  
10  
11  
12  
13  
14  
15  
16  
17  
18  
19  
20  
21  
22  
23  
24  
25  
26  
27  
28  
29  
30  
31  
32  
33  
34  
35  
36  
37  
38  
39  
40  
41  
42  
43  
44  
45  
46  
47  
48  
49  
50  
51  
52  
53  
54  
55  
56  
57  
58  
59  
60

|         |                                                              |
|---------|--------------------------------------------------------------|
| S617300 | Hind brain lacn + open intracranial wnd + 1-24hr loss consc  |
| S617400 | Hind brain lacn + open intracranial wnd+>24hr LOC + recovery |
| S617500 | Hind brain lacn open intracranial wnd+>24hr LOC not restored |
| S617600 | Hind brain lacn + open intracran wnd + LOC unspec duration   |
| S617z00 | Hind brain lacn + open intracranial wnd + concussion unspec  |
| S61y000 | Brain cont + open intracranial wound + unspec state consc    |
| S61y100 | Brain cont + open intracranial wound + no loss of consc      |
| S61y200 | Brain cont + open intracranial wound + <1hr loss of consc    |
| S61y300 | Brain cont + open intracranial wound + 1-24hr loss of consc  |
| S61y400 | Brain cont + open intracranial wound + >24hr LOC + recovery  |
| S61y500 | Brain contusion + open intracr wound+>24hr LOC not ful reco  |
| S61y600 | Brain cont + open intracranial wound + LOC unspec duration   |
| S61yz00 | Brain cont + open intracranial wound + concussion unspec     |
| S621000 | Subarachnoid h'ge inj + open intracran wound + unspec consc  |
| S621100 | Subarachnoid h'ge inj + open intracranial wound + no LOC     |
| S621200 | Subarachnoid h'ge inj + open intracran wound+<1hr loss consc |
| S621300 | Subarachnoid h'ge inj + open intracran wnd+1-24hr loss consc |
| S621400 | Subarach h'ge inj + open intracran wnd +>24hr LOC + recovery |
| S621500 | Subarach h'ge inj + open intracran wnd+>24hr LOC -restored   |
| S621600 | Subarach h'ge inj + open intracran wnd+LOC unspec duration   |
| S621z00 | Subarachnoid h'ge inj + open intracran wnd+concussion unspec |
| S623000 | Subdural h'ge inj + open intracranial wound + unspec consc   |
| S623100 | Subdural h'ge inj + open intracranial wound+no loss consc    |
| S623200 | Subdural h'ge inj + open intracranial wound+<1hr loss consc  |
| S623300 | Subdural h'ge inj + open intracranial wnd+1-24hr loss consc  |
| S623400 | Subdural h'ge inj + open intracran wound+>24hr LOC +recovery |
| S623500 | Subdural h'ge inj + open intracran wnd+>24hr LOC -restored   |
| S623600 | Subdural h'ge inj + open intracran wnd+LOC unspec duration   |
| S623z00 | Subdural h'ge inj + open intracranial wnd+concussion unspec  |
| S625000 | Extradural h'ge inj + open intracranial wnd + unspec consc   |
| S625100 | Extradural h'ge inj + open intracranial wound+no loss consc  |
| S625200 | Extradural h'ge inj + open intracranial wnd+<1hr loss consc  |
| S625300 | Extradural h'ge inj + open intracran wnd+1-24hr loss consc   |
| S625400 | Extradural h'ge inj + open intracran wnd+>24hr LOC+recovery  |
| S625500 | Extradural h'ge inj + open intracran wnd+>24hr LOC -restored |
| S625600 | Extradural h'ge inj + open intracran wnd+LOC unspec duration |
| S625z00 | Extradural h'ge inj + open intracran wnd+concussion unspec   |
| S62A100 | Traumatic extradural haematoma with open intracranial wound  |
| S631.00 | Other cerebral h'ge after injury + open intracranial wound   |
| S631000 | Oth cerebral h'ge inj + open intracran wnd + unspec consc    |
| S631100 | Oth cerebral h'ge inj + open intracranial wnd+no loss consc  |
| S631200 | Oth cerebral h'ge inj + open intracran wnd+<1hr loss consc   |
| S631300 | Oth cerebral h'ge inj + open intracran wnd+1-24hr loss consc |
| S631400 | Oth cereb h'ge inj + open intracran wnd+>24hr LOC + recovery |
| S631500 | Oth cereb h'ge inj + open intracran wnd+>24hr LOC -restored  |
| S631600 | Oth cereb h'ge inj + open intracran wnd+LOC unspec duration  |
| S631z00 | Oth cereb h'ge inj + open intracran wnd+concussion unspec    |
| S641.00 | Intracranial injury NOS + open intracranial wound            |
| S641000 | Intracranial inj NOS + open intracranial wnd + unspec consc  |
| S641100 | Intracranial inj NOS + open intracranial wound+no loss consc |

|    |                                                                      |
|----|----------------------------------------------------------------------|
| 1  |                                                                      |
| 2  | S641200 Intracranial inj NOS + open intracranial wnd+<1hr loss consc |
| 3  | S641300 Intracranial inj NOS + open intracranial wnd + 1-24hr LOC    |
| 4  | S641400 Intracranial inj NOS + open intracran wnd+>24hr LOC+recovery |
| 5  | S641500 Intracran inj NOS + open intracran wnd+>24hr LOC -restored   |
| 6  | S641600 Intracran inj NOS + open intracran wnd+LOC unspec duration   |
| 7  | S641z00 Intracranial inj NOS + open intracran wnd+concussion unspec  |
| 8  | S642100 Traumatic cerebral oedema with open intracranial wound       |
| 9  | S645100 Intracranial injury with prolonged coma with open wound      |
| 10 |                                                                      |
| 11 | S701.00 Open traumatic pneumothorax                                  |
| 12 | S703.00 Open traumatic haemothorax                                   |
| 13 | S705.00 Open traumatic haemopneumothorax                             |
| 14 | S711.00 Heart injury, open                                           |
| 15 | S711000 Heart injury with open wound into thorax, unspecified        |
| 16 | S711100 Heart contusion, with open wound into thorax                 |
| 17 | S711200 Heart laceration open, without penetration of heart chambers |
| 18 | S711300 Heart laceration open, with penetration of heart chambers    |
| 19 | S711z00 Heart injury with open wound into thorax NOS                 |
| 20 | S713000 Lung injury with open wound into thorax, unspecified         |
| 21 | S713100 Lung contusion with open wound into thorax                   |
| 22 | S713200 Lung laceration with open wound into thorax                  |
| 23 | S713z00 Lung injury with open wound into thorax, NOS                 |
| 24 | S73yz00 Gastrointestinal tract injury with open wound to cavity NOS  |
| 25 | S8...00 Open wound of head, neck and trunk                           |
| 26 | S8...12 Open wound of head                                           |
| 27 | S8...13 Open wound of trunk                                          |
| 28 | S80..00 Open wound of ocular adnexa                                  |
| 29 | S80..11 Open wound of eyelid                                         |
| 30 | S80..12 Periocular open wound                                        |
| 31 | S800.00 Eyelid skin and periocular area laceration                   |
| 32 | S803.00 Penetrating wound of orbit without mention of foreign body   |
| 33 | S804.00 Penetrating wound of orbit with foreign body                 |
| 34 | S80y.00 Other open ocular adnexa wound                               |
| 35 | S80z.00 Open wound of ocular adnexa NOS                              |
| 36 | S81..00 Open wound of eyeball                                        |
| 37 | S81..12 Open wound of eye                                            |
| 38 | S810.00 Ocular laceration without intraocular prolapse               |
| 39 | S81z.00 Open wound of eyeball NOS                                    |
| 40 | S82..00 Open wound of ear                                            |
| 41 | S820.00 Open wound of external ear                                   |
| 42 | S820000 Open wound of external ear, unspecified                      |
| 43 | S820100 Open wound of ear auricle                                    |
| 44 | S820w00 Other open wound of external ear                             |
| 45 | S820z00 Open wound of external ear not otherwise specified           |
| 46 | S821.00 Open wound of external ear with complication                 |
| 47 | S821000 Open wound of external ear with complication, unspecified    |
| 48 | S821100 Open wound of ear auricle with complication                  |
| 49 | S821z00 Open wound of external ear with complication, NOS            |
| 50 | S82v.00 Other open wound of ear                                      |
| 51 | S82v011 Open wound of drumhead without complication                  |
| 52 | S82v012 Open wound of tympanic membrane without complication         |
| 53 |                                                                      |
| 54 |                                                                      |
| 55 |                                                                      |
| 56 |                                                                      |
| 57 |                                                                      |
| 58 |                                                                      |
| 59 |                                                                      |
| 60 |                                                                      |



|    |         |                                                          |
|----|---------|----------------------------------------------------------|
| 1  | S82v100 | Open wound of ear ossicle                                |
| 2  | S82v300 | Open wound of cochlea                                    |
| 3  | S82vz00 | Other open wound of ear NOS                              |
| 4  | S82w.00 | Other open wound of ear with complication                |
| 5  | S82w000 | Open wound of ear drum with complication                 |
| 6  | S82w100 | Open wound of ear ossicle with complication              |
| 7  | S82w300 | Open wound of cochlea with complication                  |
| 8  | S82wz00 | Other open wound of ear with complication NOS            |
| 9  | S82x.00 | Open wound of ear, uncomplicated not otherwise specified |
| 10 | S82y.00 | Open wound of ear with complication, NOS                 |
| 11 | S82z.00 | Open wound of ear NOS                                    |
| 12 | S83..00 | Other open wound of head                                 |
| 13 | S830.00 | Open wound of scalp                                      |
| 14 | S830100 | Avulsion of scalp                                        |
| 15 | S831.00 | Open wound of scalp with complication                    |
| 16 | S832.00 | Open wound of nose                                       |
| 17 | S832000 | Open wound of nose, unspecified                          |
| 18 | S832100 | Open wound of nasal septum                               |
| 19 | S832200 | Open wound of nasal cavity                               |
| 20 | S832300 | Open wound of nasal sinus                                |
| 21 | S832x00 | Multiple wounds of nose                                  |
| 22 | S832z00 | Open wound of nose NOS                                   |
| 23 | S833.00 | Open wound of nose with complication                     |
| 24 | S833000 | Open wound of nose with complication, unspecified        |
| 25 | S833100 | Open wound of nasal septum with complication             |
| 26 | S833200 | Open wound of nasal cavity with complication             |
| 27 | S833300 | Open wound of nasal sinus with complication              |
| 28 | S833x00 | Multiple open wounds of nose with complication           |
| 29 | S833z00 | Open wound of nose with complication, NOS                |
| 30 | S834.00 | Open wound of face                                       |
| 31 | S834000 | Open wound of face, unspecified                          |
| 32 | S834100 | Open wound of cheek                                      |
| 33 | S834200 | Open wound of forehead                                   |
| 34 | S834300 | Open wound of eyebrow                                    |
| 35 | S834400 | Open wound of lip                                        |
| 36 | S834500 | Open wound of jaw                                        |
| 37 | S834600 | Open wound of chin                                       |
| 38 | S834x00 | Multiple open wounds of face                             |
| 39 | S834z00 | Open wound of face, NOS                                  |
| 40 | S835.00 | Open wound of face with complication                     |
| 41 | S835000 | Open wound of face with complication, unspecified        |
| 42 | S835100 | Open wound of cheek with complication                    |
| 43 | S835200 | Open wound of forehead with complication                 |
| 44 | S835300 | Open wound of eyebrow with complication                  |
| 45 | S835400 | Open wound of lip with complication                      |
| 46 | S835500 | Open wound of jaw with complication                      |
| 47 | S835x00 | Multiple open wounds of face with complication           |
| 48 | S835z00 | Open wound of face with complication, NOS                |
| 49 | S836.00 | Open wound in mouth                                      |
| 50 | S836000 | Open wound in mouth, unspecified                         |

|    |         |                                                            |
|----|---------|------------------------------------------------------------|
| 1  | S836100 | Open wound of buccal mucosa                                |
| 2  | S836200 | Open wound of gum                                          |
| 3  | S836400 | Open wound of tongue                                       |
| 4  | S836500 | Open wound of mouth floor                                  |
| 5  | S836600 | Open wound of palate                                       |
| 6  | S837100 | Open wound of buccal mucosa with complication              |
| 7  | S837200 | Open wound of gum with complication                        |
| 8  | S837400 | Open wound of tongue with complication                     |
| 9  | S837500 | Open wound of mouth floor with complication                |
| 10 | S837600 | Open wound of palate with complication                     |
| 11 | S83x.00 | Other open wound of head                                   |
| 12 | S83y.00 | Other open wound of head with complication                 |
| 13 | S83z.00 | Open wound of head NOS                                     |
| 14 | S84..00 | Open wound of neck                                         |
| 15 | S840.00 | Open wound of larynx and trachea                           |
| 16 | S840.11 | Open wound of larynx without complication                  |
| 17 | S840.12 | Open wound of trachea without complication                 |
| 18 | S840000 | Open wound of larynx and trachea, unspecified              |
| 19 | S840100 | Open wound of larynx                                       |
| 20 | S840200 | Open wound of trachea                                      |
| 21 | S840z00 | Open wound of larynx and trachea not otherwise specified   |
| 22 | S841.00 | Open wound of larynx and trachea with complication         |
| 23 | S841.11 | Open wound of larynx with complication                     |
| 24 | S841.12 | Open wound of trachea with complication                    |
| 25 | S841000 | Open wound of larynx and trachea with complication, unspec |
| 26 | S841100 | Open wound of larynx with complication                     |
| 27 | S841200 | Open wound of trachea with complication                    |
| 28 | S841z00 | Open wound of larynx and trachea with complication, NOS    |
| 29 | S842.00 | Open wound of thyroid                                      |
| 30 | S843.00 | Open wound of thyroid with complication                    |
| 31 | S844.00 | Open wound of pharynx                                      |
| 32 | S845.00 | Open wound of pharynx with complication                    |
| 33 | S84x.00 | Other open wound of neck                                   |
| 34 | S84x000 | Open wound of neck nape                                    |
| 35 | S84x100 | Open wound of supraclavicular region                       |
| 36 | S84xz00 | Open wound of neck, NOS                                    |
| 37 | S84xz11 | Open wound of throat NOS                                   |
| 38 | S84y.00 | Other open wound of neck with complication                 |
| 39 | S84y000 | Open wound of neck nape with complication                  |
| 40 | S84y100 | Open wound of supraclavicular region with complication     |
| 41 | S84yz00 | Open wound of neck with complication, NOS                  |
| 42 | S84z.00 | Open wound of neck NOS                                     |
| 43 | S85..00 | Open wound of chest wall                                   |
| 44 | S850.00 | Open wound of chest wall, uncomplicated                    |
| 45 | S850000 | Degloving injury chest wall                                |
| 46 | S851.00 | Open wound of chest wall with complication                 |
| 47 | S852.00 | Open wound of front wall of thorax                         |
| 48 | S853.00 | Multiple open wounds of thoracic wall                      |
| 49 | S855.00 | Open wound of back wall of thorax                          |
| 50 | S85X.00 | Open wound of thorax, part unspecified                     |



|    |         |                                                              |
|----|---------|--------------------------------------------------------------|
| 1  |         |                                                              |
| 2  | S85z.00 | Open wound of chest wall NOS                                 |
| 3  | S86..00 | Open wound of back                                           |
| 4  | S86..11 | Open wound of loin                                           |
| 5  | S86..12 | Open wound of lumbar region                                  |
| 6  | S860.00 | Open wound of back, uncomplicated                            |
| 7  | S860000 | Degloving injury back                                        |
| 8  | S861.00 | Open wound of back with complication                         |
| 9  | S86z.00 | Open wound of back NOS                                       |
| 10 | S87..00 | Open wound of buttock                                        |
| 11 | S87..11 | Open wound of sacroiliac region                              |
| 12 | S870.00 | Open wound of buttock, uncomplicated                         |
| 13 | S870000 | Degloving injury buttock                                     |
| 14 | S871.00 | Open wound of buttock with complication                      |
| 15 | S87z.00 | Open wound of buttock NOS                                    |
| 16 | S88..00 | Open wound of external genital organs                        |
| 17 | S880.00 | Open wound of penis                                          |
| 18 | S880000 | Degloving injury penis                                       |
| 19 | S881.00 | Open wound of penis with complication                        |
| 20 | S882.00 | Open wound of scrotum and testes                             |
| 21 | S882000 | Open wound of scrotum                                        |
| 22 | S882100 | Open wound of testes                                         |
| 23 | S882200 | Degloving injury scrotum                                     |
| 24 | S882z00 | Open wound of scrotum and testes not otherwise specified     |
| 25 | S883.00 | Open wound of scrotum and testes with complication           |
| 26 | S883000 | Open wound of scrotum with complication                      |
| 27 | S883100 | Open wound of testes with complication                       |
| 28 | S883z00 | Open wound of scrotum and testes with complication, NOS      |
| 29 | S884.00 | Open wound of vulva                                          |
| 30 | S884000 | Open wound of vulva, unspecified                             |
| 31 | S884100 | Open wound of labium majus                                   |
| 32 | S884200 | Open wound of labium minus                                   |
| 33 | S884z00 | Open wound of vulva, NOS                                     |
| 34 | S885.00 | Open wound of vulva with complication                        |
| 35 | S885000 | Open wound of vulva with complication, unspecified           |
| 36 | S885100 | Open wound of labium majus with complication                 |
| 37 | S885200 | Open wound of labium minus with complication                 |
| 38 | S885z00 | Open wound of vulva with complication, NOS                   |
| 39 | S886.00 | Open wound of vagina                                         |
| 40 | S887.00 | Open wound of vagina with complication                       |
| 41 | S88x.00 | Other open wound of external genital organ                   |
| 42 | S88y.00 | Other open wound of external genital organ with complication |
| 43 | S88z.00 | Open wound of external genital organ NOS                     |
| 44 | S89..00 | Other open wounds of other sites, excluding limbs            |
| 45 | S890.00 | Open wound of breast                                         |
| 46 | S891.00 | Open wound of breast with complication                       |
| 47 | S892.00 | Open wound of anterior abdominal wall                        |
| 48 | S892000 | Open wound of epigastric region                              |
| 49 | S892100 | Open wound umbilical region                                  |
| 50 | S892200 | Open wound of hypogastric region                             |
| 51 | S892300 | Open wound of pubic region without complication              |
| 52 |         |                                                              |
| 53 |         |                                                              |
| 54 |         |                                                              |
| 55 |         |                                                              |
| 56 |         |                                                              |
| 57 |         |                                                              |
| 58 |         |                                                              |
| 59 |         |                                                              |
| 60 |         |                                                              |

|    |         |                                                              |
|----|---------|--------------------------------------------------------------|
| 1  |         |                                                              |
| 2  | S892z00 | Open wound anterior abdominal wall without complication NOS  |
| 3  | S893.00 | Open wound of anterior abdominal wall with complication      |
| 4  | S893000 | Open wound of epigastrium with complication                  |
| 5  | S893100 | Open wound of umbilical region with complication             |
| 6  | S893200 | Open wound of hypogastrium with complication                 |
| 7  | S893300 | Open wound of pubic region with complication                 |
| 8  | S893z00 | Open wound of anterior abdominal wall with complication NOS  |
| 9  | S894.00 | Open wound of lateral abdominal wall                         |
| 10 | S894000 | Open wound of hypochondrium                                  |
| 11 | S894100 | Open wound of lumbar region                                  |
| 12 | S894111 | Open wound of flank without complication                     |
| 13 | S894200 | Open wound of iliac region                                   |
| 14 | S894300 | Open wound of inguinal region                                |
| 15 | S894311 | Open wound of groin without complication                     |
| 16 | S894400 | Open wound of flank without complication                     |
| 17 | S894500 | Open wound of loin                                           |
| 18 | S894z00 | Open wound of lateral abdominal wall NOS                     |
| 19 | S895.00 | Open wound of lateral abdominal wall with complication       |
| 20 | S895000 | Open wound of hypochondrium with complication                |
| 21 | S895100 | Open wound of lumbar region with complication                |
| 22 | S895111 | Open wound of flank with complication                        |
| 23 | S895200 | Open wound of iliac region with complication                 |
| 24 | S895300 | Open wound of inguinal region with complication              |
| 25 | S895311 | Open wound of groin with complication                        |
| 26 | S895400 | Open wound of flank with complication                        |
| 27 | S895z00 | Open wound of lateral abdominal wall with complication, NOS  |
| 28 | S89v.00 | Other and unspecified open wound of trunk                    |
| 29 | S89v000 | Open wound of pelvic region                                  |
| 30 | S89v100 | Open wound of perineum                                       |
| 31 | S89vz00 | Other and unspecified open wound of trunk, NOS               |
| 32 | S89w.00 | Other and unspecified open wound of trunk with complication  |
| 33 | S89w000 | Open wound of pelvic region with complication                |
| 34 | S89w100 | Open wound of perineum with complication                     |
| 35 | S89wz00 | Other and unspecified open wound trunk with complication NOS |
| 36 | S89x.00 | Multiple open wounds, of unspecified site                    |
| 37 | S89y.00 | Multiple open wounds with complication, of unspecified site  |
| 38 | S89z.00 | Other open wounds NOS                                        |
| 39 | S8A..00 | Open wounds involving head with neck                         |
| 40 | S8z..00 | Open wound of head, neck and trunk NOS                       |
| 41 | S8z..11 | Laceration NOS                                               |
| 42 | S8z..12 | Traumatic ulcer NOS                                          |
| 43 | S8z..13 | Laceration                                                   |
| 44 | S9...00 | Open wound of upper limb                                     |
| 45 | S9...11 | Laceration of arm                                            |
| 46 | S9...12 | Open wound of arm                                            |
| 47 | S90..00 | Open wound of shoulder region and upper limb                 |
| 48 | S900.00 | Open wound of shoulder/upper limb without complication       |
| 49 | S900000 | Open wound of shoulder region                                |
| 50 | S900100 | Open wound of scapular region                                |
| 51 | S900200 | Open wound of axillary region                                |

|    |         |                                                             |
|----|---------|-------------------------------------------------------------|
| 1  |         |                                                             |
| 2  | S900300 | Open wound of upper arm                                     |
| 3  | S900400 | Multiple open wounds of shoulder and upper arm              |
| 4  | S900x00 | Multiple open wounds of upper arm                           |
| 5  | S900z00 | Open wound of shoulder and upper limb NOS                   |
| 6  | S901.00 | Open wound of shoulder and upper limb with complication     |
| 7  | S901000 | Open wound of shoulder region with complication             |
| 8  | S901100 | Open wound of scapular region with complication             |
| 9  | S901200 | Open wound of axillary region with complication             |
| 10 | S901300 | Open wound of upper arm with complication                   |
| 11 | S901x00 | Multiple open wounds of upper arm with complication         |
| 12 | S901z00 | Open wound of shoulder and upper arm with complication, NOS |
| 13 | S902.00 | Open wound of shoulder/upper limb with tendon involvement   |
| 14 | S902.11 | Open wound of arm with tendon injury                        |
| 15 | S902000 | Open wound of shoulder region with tendon involvement       |
| 16 | S902100 | Open wound of scapular region with tendon involvement       |
| 17 | S902200 | Open wound of axillary region with tendon involvement       |
| 18 | S902300 | Open wound of upper arm with tendon involvement             |
| 19 | S902x00 | Multiple open wounds of upper arm with tendon involvement   |
| 20 | S902z00 | Open wound shoulder/upper arm with tendon involvement, NOS  |
| 21 | S903.00 | Degloving injury, shoulder or upper arm                     |
| 22 | S903000 | Degloving injury, shoulder area                             |
| 23 | S903100 | Degloving injury, scapular area                             |
| 24 | S903200 | Degloving injury, axilla                                    |
| 25 | S903300 | Degloving injury, upper arm                                 |
| 26 | S90z.00 | Open wound of shoulder region and upper arm NOS             |
| 27 | S91..00 | Open wound of elbow, forearm and wrist                      |
| 28 | S910.00 | Open wound of lower arm without mention of complication     |
| 29 | S910000 | Open wound of forearm                                       |
| 30 | S910100 | Open wound of elbow                                         |
| 31 | S910200 | Open wound of wrist, unspecified                            |
| 32 | S910300 | Open wound of wrist, volar                                  |
| 33 | S910400 | Open wound of wrist, dorsal                                 |
| 34 | S910z00 | Open wound of lower arm, NOS                                |
| 35 | S911.00 | Open wound of lower arm with complication                   |
| 36 | S911000 | Open wound of forearm with complication                     |
| 37 | S911100 | Open wound of elbow with complication                       |
| 38 | S911200 | Open wound of wrist with complication                       |
| 39 | S911z00 | Open wound of lower arm with complication, NOS              |
| 40 | S912.00 | Open wound of lower arm with tendon involvement             |
| 41 | S912.11 | Open wound of lower arm with tendon injury                  |
| 42 | S912000 | Open wound of forearm with tendon involvement               |
| 43 | S912100 | Open wound of elbow with tendon involvement                 |
| 44 | S912200 | Open wound of wrist with tendon involvement                 |
| 45 | S912300 | Complete division extensor tendon wrist                     |
| 46 | S912400 | Complete division flexor tendon wrist                       |
| 47 | S912z00 | Open wound of lower arm with tendon involvement, NOS        |
| 48 | S913.00 | Degloving injury lower arm                                  |
| 49 | S913000 | Degloving injury, forearm                                   |
| 50 | S913100 | Degloving injury, elbow area                                |
| 51 | S913200 | Degloving injury wrist, volar                               |
| 52 |         |                                                             |
| 53 |         |                                                             |
| 54 |         |                                                             |
| 55 |         |                                                             |
| 56 |         |                                                             |
| 57 |         |                                                             |
| 58 |         |                                                             |
| 59 |         |                                                             |
| 60 |         |                                                             |

|    |         |                                                             |
|----|---------|-------------------------------------------------------------|
| 1  | S913300 | Degloving injury wrist, dorsum                              |
| 2  | S91z.00 | Open wound of elbow, forearm and wrist NOS                  |
| 3  | S92..00 | Open wound of hand, excluding finger(s)                     |
| 4  | S920.00 | Open wound of hand without mention of complication          |
| 5  | S920000 | Open wound of hand, palm                                    |
| 6  | S920100 | Open wound of hand, dorsum                                  |
| 7  | S920200 | Multiple open wounds of wrist and hand                      |
| 8  | S921.00 | Open wound of hand with complication                        |
| 9  | S922.00 | Open wound of hand with tendon involvement                  |
| 10 | S923.00 | Degloving injury hand                                       |
| 11 | S923000 | Degloving injury hand, palmar                               |
| 12 | S923100 | Degloving injury hand, dorsum                               |
| 13 | S924.00 | Severe multi tissue damage hand                             |
| 14 | S925.00 | Massive multi tissue damage hand                            |
| 15 | S92z.00 | Open wound of hand, excluding fingers, NOS                  |
| 16 | S93..00 | Open wound of finger(s) or thumb                            |
| 17 | S93..11 | Open wound of fingernail                                    |
| 18 | S93..12 | Open wound of nail                                          |
| 19 | S93..13 | Open wound of thumb                                         |
| 20 | S93..14 | Open wound of thumbnail                                     |
| 21 | S930.00 | Open wound of finger or thumb without mention of complicatn |
| 22 | S930000 | Open wound, finger                                          |
| 23 | S930100 | Open wound, finger, multiple                                |
| 24 | S930200 | Open wound, thumb                                           |
| 25 | S931.00 | Open wound of finger or thumb with complication             |
| 26 | S932.00 | Open wound of finger or thumb with tendon involvement       |
| 27 | S932.11 | Open wound of finger with tendon injury                     |
| 28 | S932000 | Complete division, flexor digitorum superficialis tendon    |
| 29 | S932100 | Complete division, flexor digitorum profundus tendon        |
| 30 | S932200 | Complete division, both flexor tendons                      |
| 31 | S932300 | Complete division, extensor digitorum tendon                |
| 32 | S932400 | Mallet finger with open tendon injury                       |
| 33 | S932500 | Complete division, flexor pollicis longus tendon            |
| 34 | S932600 | Complete division, extensor pollicis longus tendon          |
| 35 | S932700 | Mallet thumb with open tendon injury                        |
| 36 | S933.00 | Degloving injury, finger                                    |
| 37 | S933000 | Degloving injury, finger unspecified                        |
| 38 | S933100 | Degloving injury, finger, multiple                          |
| 39 | S933200 | Ring avulsion injury, class 1                               |
| 40 | S933300 | Ring avulsion injury, class 2                               |
| 41 | S933400 | Ring avulsion injury, class 3                               |
| 42 | S933500 | Ring avulsion injury, class 4                               |
| 43 | S934.00 | Degloving injury, thumb                                     |
| 44 | S935.00 | Open wound fingernail                                       |
| 45 | S936.00 | Open wound thumbnail                                        |
| 46 | S937.00 | Open wound of finger with damage to nail                    |
| 47 | S938.00 | Open wound of thumb with damage to nail                     |
| 48 | S93z.00 | Open wound of finger(s) NOS                                 |
| 49 | S94..00 | Multiple and unspecified open wound of upper limb           |
| 50 | S940.00 | Multiple/unspec open wound upper limb without complication  |

|    |         |                                                             |
|----|---------|-------------------------------------------------------------|
| 1  |         |                                                             |
| 2  | S941.00 | Multiple/unspec open wound of upper limb with complication  |
| 3  | S942.00 | Multiple/unspec open wound upper limb with tendon involved  |
| 4  | S942.11 | Multiple/unspec open wound of upper limb with tendon injury |
| 5  | S94z.00 | Multiple and unspecified open wound of upper limb NOS       |
| 6  | S96X.00 | Comb traum amp of (part of) fing(s) + oth part wrist/hand   |
| 7  | S9z..00 | Open wound of upper limb NOS                                |
| 8  | SA...00 | Open wound of lower limb                                    |
| 9  | SA...11 | Open wound of leg                                           |
| 10 | SA...12 | Laceration - leg                                            |
| 11 | SA0..00 | Open wound of hip and thigh                                 |
| 12 | SA00.00 | Open wound of hip and thigh without mention of complication |
| 13 | SA00000 | Open wound of hip                                           |
| 14 | SA00100 | Open wound of thigh                                         |
| 15 | SA00z00 | Open wound hip and thigh, NOS                               |
| 16 | SA01.00 | Open wound of hip and thigh with complication               |
| 17 | SA01000 | Open wound of hip with complication                         |
| 18 | SA01100 | Open wound of thigh with complication                       |
| 19 | SA01z00 | Open wound of hip and thigh with complication, NOS          |
| 20 | SA02.00 | Open wound of hip and thigh with tendon involvement         |
| 21 | SA02.11 | Open wound of hip and thigh with tendon injury              |
| 22 | SA02000 | Open wound of hip with tendon involvement                   |
| 23 | SA02100 | Open wound of thigh with tendon involvement                 |
| 24 | SA02200 | Complete division, quadriceps tendon                        |
| 25 | SA02300 | Complete division, hamstring tendon                         |
| 26 | SA02z00 | Open wound of hip and thigh with tendon involvement, NOS    |
| 27 | SA03.00 | Degloving injury, hip or thigh                              |
| 28 | SA03000 | Degloving injury, hip                                       |
| 29 | SA03100 | Degloving injury, thigh                                     |
| 30 | SA04.00 | Severe multi tissue damage hip or thigh                     |
| 31 | SA05.00 | Massive multi tissue damage hip or thigh                    |
| 32 | SA0z.00 | Open wound of hip and thigh NOS                             |
| 33 | SA1..00 | Open wound of knee, leg and ankle                           |
| 34 | SA10.00 | Open wound of knee, leg and ankle without complication      |
| 35 | SA10000 | Open wound of knee                                          |
| 36 | SA10100 | Open wound of leg                                           |
| 37 | SA10200 | Open wound of ankle                                         |
| 38 | SA10z00 | Open wound of knee, leg and ankle NOS                       |
| 39 | SA11.00 | Open wound of knee, leg and ankle with complication         |
| 40 | SA11000 | Open wound of knee with complication                        |
| 41 | SA11100 | Open wound of lower leg with complication                   |
| 42 | SA11200 | Open wound of ankle with complication                       |
| 43 | SA11z00 | Open wound of knee/leg/ankle with complication, NOS         |
| 44 | SA12.00 | Open wound of knee, leg and ankle with tendon involvement   |
| 45 | SA12.11 | Open wound of leg with tendon injury                        |
| 46 | SA12000 | Open wound of knee with tendon involvement                  |
| 47 | SA12100 | Open wound of lower leg with tendon involvement             |
| 48 | SA12200 | Open wound of ankle with tendon involvement                 |
| 49 | SA12300 | Complete division, patellar tendon                          |
| 50 | SA12400 | Complete division, tendocalcaneus (Achilles tendon)         |
| 51 | SA12z00 | Open wound of knee/leg/ankle with tendon involvement, NOS   |
| 52 |         |                                                             |
| 53 |         |                                                             |
| 54 |         |                                                             |
| 55 |         |                                                             |
| 56 |         |                                                             |
| 57 |         |                                                             |
| 58 |         |                                                             |
| 59 |         |                                                             |
| 60 |         |                                                             |

|    |         |                                                            |
|----|---------|------------------------------------------------------------|
| 1  |         |                                                            |
| 2  | SA13.00 | Degloving injury, knee or leg or ankle                     |
| 3  | SA13000 | Degloving injury, knee                                     |
| 4  | SA13100 | Degloving injury, lower leg                                |
| 5  | SA13200 | Degloving injury, ankle                                    |
| 6  | SA14.00 | Severe multi tissue damage lower leg                       |
| 7  | SA15.00 | Massive multi tissue damage lower leg                      |
| 8  | SA16.00 | Multiple injuries of ankle and foot                        |
| 9  | SA1z.00 | Open wound of knee, leg and ankle NOS                      |
| 10 | SA2..00 | Open wound of foot, excluding toe(s)                       |
| 11 | SA2..11 | Open wound of heel                                         |
| 12 | SA20.00 | Open wound of foot without mention of complication         |
| 13 | SA20100 | Open wound foot, plantar                                   |
| 14 | SA20200 | Open wound foot, dorsum                                    |
| 15 | SA20300 | Open wound, heel                                           |
| 16 | SA21.00 | Open wound of foot with complication                       |
| 17 | SA22.00 | Open wound of foot with tendon involvement                 |
| 18 | SA22.11 | Open wound of foot with tendon injury                      |
| 19 | SA22000 | Complete division, flexor tendon, foot                     |
| 20 | SA22100 | Complete division, extensor tendon, foot                   |
| 21 | SA23.00 | Degloving injury, foot                                     |
| 22 | SA23000 | Degloving injury foot, plantar                             |
| 23 | SA23100 | Degloving injury foot, dorsum                              |
| 24 | SA23200 | Degloving injury heel                                      |
| 25 | SA24.00 | Severe multi tissue damage foot                            |
| 26 | SA25.00 | Massive multi tissue damage foot                           |
| 27 | SA2z.00 | Open wound of foot NOS                                     |
| 28 | SA3..00 | Open wound of toe(s)                                       |
| 29 | SA3..11 | Open wound of toenail                                      |
| 30 | SA30.00 | Open wound of toe(s) without mention of complication       |
| 31 | SA31.00 | Open wound of toe(s) with complication                     |
| 32 | SA32.00 | Open wound of toe(s) with tendon involvement               |
| 33 | SA32.11 | Open wound of toe(s) with tendon injury                    |
| 34 | SA33.00 | Degloving injury toe(s)                                    |
| 35 | SA33000 | Degloving injury toe                                       |
| 36 | SA33100 | Degloving injury, multiple toes                            |
| 37 | SA34.00 | Open wound of toe(s) with damage to nail                   |
| 38 | SA3z.00 | Open wound of toe(s) NOS                                   |
| 39 | SA4..00 | Multiple and unspecified open wound of lower limb          |
| 40 | SA40.00 | Multiple and unspec open wound leg, without complication   |
| 41 | SA41.00 | Multiple and unspec open wound of leg with complication    |
| 42 | SA42.00 | Multiple and unspec open wound leg with tendon involvement |
| 43 | SA4z.00 | Multiple and unspecified open wound of lower limb NOS      |
| 44 | SA9..00 | Multiple open wounds of hip and thigh                      |
| 45 | SAA..00 | Open wounds involving multiple regions of lower limb(s)    |
| 46 | SAz..00 | Open wound of lower limb NOS                               |
| 47 | SC10.00 | Late effect of open wound of head, neck and trunk          |
| 48 | SC11.00 | Late effect of open wound arm or leg without tendon injury |
| 49 | SC15.00 | Late effect of burn of eye, head and neck                  |
| 50 | SC15.11 | Late effect of burn of head or neck                        |
| 51 | SC16.00 | Late effect of burn of wrist and hand                      |
| 52 |         |                                                            |
| 53 |         |                                                            |
| 54 |         |                                                            |
| 55 |         |                                                            |
| 56 |         |                                                            |
| 57 |         |                                                            |
| 58 |         |                                                            |
| 59 |         |                                                            |
| 60 |         |                                                            |



|    |         |                                                              |
|----|---------|--------------------------------------------------------------|
| 1  |         |                                                              |
| 2  | SC17.00 | Late effect of burn of arm, leg and foot                     |
| 3  | SC17.11 | Late effect of burn of arm or leg                            |
| 4  | SC18.00 | Late effect of other burns                                   |
| 5  | SC19.00 | Late effect of burn NOS                                      |
| 6  | SC1A.00 | Late effect of burn of upper limb                            |
| 7  | SC38.00 | Sequelae of open wound of head                               |
| 8  | SC3A.00 | Sequelae of superficial injury + open wound of neck + trunk  |
| 9  | SC3C.00 | Sequelae of open wound of upper limb                         |
| 10 | SC3D000 | Sequelae of open wound of lower limb                         |
| 11 | SC44.00 | Sequelae of burns, corrosions and frostbite                  |
| 12 | SC44000 | Sequelae of burn, corrosion and frostbite of trunk           |
| 13 | SC44100 | Sequelae of burn, corrosion and frostbite of lower limb      |
| 14 | SC44200 | Seq/burn+corros classfbl only accord extent/body surf involv |
| 15 | SD01.00 | Abrasion or friction burn of head, infected                  |
| 16 | SD01.11 | Abrasion or friction burn of head, infected                  |
| 17 | SD01000 | Abrasion of face, infected                                   |
| 18 | SD01100 | Abrasion of neck, infected                                   |
| 19 | SD01200 | Abrasion of scalp, infected                                  |
| 20 | SD01z00 | Abrasion or friction burn of head, infected, NOS             |
| 21 | SD03.00 | Blister of head, infected                                    |
| 22 | SD03000 | Blister of face, infected                                    |
| 23 | SD03100 | Blister of neck, infected                                    |
| 24 | SD03200 | Blister of scalp, infected                                   |
| 25 | SD03z00 | Blister of head, infected, NOS                               |
| 26 | SD05.00 | Insect bite, nonvenomous, of head, infected                  |
| 27 | SD05.11 | Insect bite, nonvenomous, of head, infected                  |
| 28 | SD05000 | Insect bite, nonvenomous, of face, infected                  |
| 29 | SD05100 | Insect bite, nonvenomous, of neck, infected                  |
| 30 | SD05200 | Insect bite, nonvenomous, of scalp, infected                 |
| 31 | SD05z00 | Insect bite, nonvenomous, of head, infected, NOS             |
| 32 | SD11.00 | Abrasion or friction burn of trunk, infected                 |
| 33 | SD11000 | Abrasion of interscapular region, infected                   |
| 34 | SD11100 | Abrasion of chest wall, infected                             |
| 35 | SD11200 | Abrasion of breast, infected                                 |
| 36 | SD11300 | Abrasion of abdominal wall, infected                         |
| 37 | SD11400 | Abrasion of back, infected                                   |
| 38 | SD11500 | Abrasion of buttock, infected                                |
| 39 | SD11600 | Abrasion of anus, infected                                   |
| 40 | SD11700 | Abrasion of flank, infected                                  |
| 41 | SD11800 | Abrasion of groin, infected                                  |
| 42 | SD11900 | Abrasion of perineum, infected                               |
| 43 | SD11A00 | Abrasion of penis, infected                                  |
| 44 | SD11B00 | Abrasion of scrotum and testis, infected                     |
| 45 | SD11B11 | Abrasion or friction burn of scrotum, infected               |
| 46 | SD11B12 | Abrasion or friction burn of testis, infected                |
| 47 | SD11C00 | Abrasion of vulva, infected                                  |
| 48 | SD11z00 | Abrasion or friction burn of trunk, infected, NOS            |
| 49 | SD13.00 | Blister of trunk, infected                                   |
| 50 | SD13000 | Blister of interscapular region, infected                    |
| 51 | SD13100 | Blister of chest wall, infected                              |
| 52 |         |                                                              |
| 53 |         |                                                              |
| 54 |         |                                                              |
| 55 |         |                                                              |
| 56 |         |                                                              |
| 57 |         |                                                              |
| 58 |         |                                                              |
| 59 |         |                                                              |
| 60 |         |                                                              |

|    |         |                                                             |
|----|---------|-------------------------------------------------------------|
| 1  |         |                                                             |
| 2  | SD13200 | Blister of breast, infected                                 |
| 3  | SD13300 | Blister of abdominal wall, infected                         |
| 4  | SD13400 | Blister of back, infected                                   |
| 5  | SD13500 | Blister of buttock, infected                                |
| 6  | SD13600 | Blister of anus, infected                                   |
| 7  | SD13700 | Blister of flank, infected                                  |
| 8  | SD13800 | Blister of groin, infected                                  |
| 9  | SD13900 | Blister of perineum, infected                               |
| 10 | SD13A00 | Blister of penis, infected                                  |
| 11 | SD13B00 | Blister of scrotum and testis, infected                     |
| 12 | SD13B11 | Blister of scrotum, infected                                |
| 13 | SD13B12 | Blister of testis, infected                                 |
| 14 | SD13C00 | Blister of vulva, infected                                  |
| 15 | SD13D00 | Blister of vagina, infected                                 |
| 16 | SD13z00 | Blister of trunk, infected, NOS                             |
| 17 | SD15.00 | Insect bite, nonvenomous, of trunk, infected                |
| 18 | SD15000 | Insect bite, nonvenomous, of interscapular region, infected |
| 19 | SD15100 | Insect bite, nonvenomous, of chest wall, infected           |
| 20 | SD15200 | Insect bite, nonvenomous, of breast, infected               |
| 21 | SD15300 | Insect bite, nonvenomous, of abdominal wall, infected       |
| 22 | SD15400 | Insect bite, nonvenomous, of back, infected                 |
| 23 | SD15500 | Insect bite, nonvenomous, of buttock, infected              |
| 24 | SD15600 | Insect bite, nonvenomous, of anus, infected                 |
| 25 | SD15700 | Insect bite, nonvenomous, of flank, infected                |
| 26 | SD15800 | Insect bite, nonvenomous, of groin, infected                |
| 27 | SD15900 | Insect bite, nonvenomous, of perineum, infected             |
| 28 | SD15A00 | Insect bite, nonvenomous, of penis, infected                |
| 29 | SD15B00 | Insect bite, nonvenomous, of scrotum and testis, infected   |
| 30 | SD15B11 | Insect bite, nonvenomous, of scrotum, infected              |
| 31 | SD15B12 | Insect bite, nonvenomous, of testis, infected               |
| 32 | SD15C00 | Insect bite, nonvenomous, of vulva, infected                |
| 33 | SD15D00 | Insect bite, nonvenomous, of vagina, infected               |
| 34 | SD15z00 | Insect bite, nonvenomous, of trunk, infected, NOS           |
| 35 | SD1z.00 | Superficial injury of trunk NOS, infected                   |
| 36 | SD1z000 | Superficial injury of interscapular region NOS, infected    |
| 37 | SD1z100 | Superficial injury of chest wall NOS, infected              |
| 38 | SD1z200 | Superficial injury of breast NOS, infected                  |
| 39 | SD1z300 | Superficial injury of abdominal wall NOS, infected          |
| 40 | SD1z400 | Superficial injury of back NOS, infected                    |
| 41 | SD1z500 | Superficial injury of buttock NOS, infected                 |
| 42 | SD1z600 | Superficial injury of anus NOS, infected                    |
| 43 | SD1z700 | Superficial injury of flank NOS, infected                   |
| 44 | SD1z800 | Superficial injury of groin NOS, infected                   |
| 45 | SD1z900 | Superficial injury of perineum NOS, infected                |
| 46 | SD1zA00 | Superficial injury of penis NOS, infected                   |
| 47 | SD1zB00 | Superficial injury of scrotum and testis NOS, infected      |
| 48 | SD1zC00 | Superficial injury of vulva NOS, infected                   |
| 49 | SD1z000 | Superficial injury of trunk NOS, infection NOS              |
| 50 | SD21.00 | Abrasion or friction burn of shoulder/upper arm, infected   |
| 51 | SD21000 | Abrasion of shoulder, infected                              |
| 52 |         |                                                             |
| 53 |         |                                                             |
| 54 |         |                                                             |
| 55 |         |                                                             |
| 56 |         |                                                             |
| 57 |         |                                                             |
| 58 |         |                                                             |
| 59 |         |                                                             |
| 60 |         |                                                             |



|    |         |                                                             |
|----|---------|-------------------------------------------------------------|
| 1  |         |                                                             |
| 2  | SD21100 | Abrasion of scapular region, infected                       |
| 3  | SD21200 | Abrasion of axilla, infected                                |
| 4  | SD21300 | Abrasion of upper arm, infected                             |
| 5  | SD21z00 | Abrasion or friction burn shoulder/upper arm, infected, NOS |
| 6  | SD23.00 | Blister of shoulder and upper arm, infected                 |
| 7  | SD23000 | Blister of shoulder, infected                               |
| 8  | SD23100 | Blister of scapular region, infected                        |
| 9  | SD23200 | Blister of axilla, infected                                 |
| 10 | SD23300 | Blister of upper arm, infected                              |
| 11 | SD23z00 | Blister of shoulder and upper arm, infected, NOS            |
| 12 | SD25.00 | Insect bite, nonvenomous, of shoulder/upper arm, infected   |
| 13 | SD25000 | Insect bite, nonvenomous, of shoulder, infected             |
| 14 | SD25100 | Insect bite, nonvenomous, of interscapular region, infected |
| 15 | SD25200 | Insect bite, nonvenomous, of axilla, infected               |
| 16 | SD25300 | Insect bite, nonvenomous, of upper arm, infected            |
| 17 | SD25z00 | Insect bite, nonvenomous, shoulder/upper arm, infected, NOS |
| 18 | SD2z.00 | Superficial injury of shoulder and upper arm NOS, infected  |
| 19 | SD2z000 | Superficial injury of shoulder NOS, infected                |
| 20 | SD2z100 | Superficial injury of scapular region NOS, infected         |
| 21 | SD2z200 | Superficial injury of axilla NOS, infected                  |
| 22 | SD2z300 | Superficial injury of upper arm NOS, infected               |
| 23 | SD2zz00 | Superficial injury shoulder/upper arm, infection NOS        |
| 24 | SD31.00 | Abrasion or friction burn of lower arm, infected            |
| 25 | SD31000 | Abrasion of elbow, infected                                 |
| 26 | SD31100 | Abrasion of forearm, infected                               |
| 27 | SD31200 | Abrasion of wrist, infected                                 |
| 28 | SD31z00 | Abrasion or friction burn of lower arm, infected, NOS       |
| 29 | SD33.00 | Blister of lower arm, infected                              |
| 30 | SD33000 | Blister of elbow, infected                                  |
| 31 | SD33100 | Blister of forearm, infected                                |
| 32 | SD33200 | Blister of wrist, infected                                  |
| 33 | SD33z00 | Blister of lower arm, infected, NOS                         |
| 34 | SD35.00 | Insect bite, nonvenomous, of lower arm, infected            |
| 35 | SD35000 | Insect bite, nonvenomous, of elbow, infected                |
| 36 | SD35100 | Insect bite, nonvenomous, of forearm, infected              |
| 37 | SD35200 | Insect bite, nonvenomous, of wrist, infected                |
| 38 | SD35z00 | Insect bite, nonvenomous, of lower arm, infected, NOS       |
| 39 | SD3z.00 | Superficial injury of lower arm NOS, infected               |
| 40 | SD3z000 | Superficial injury of elbow NOS, infected                   |
| 41 | SD3z100 | Superficial injury of forearm NOS, infected                 |
| 42 | SD3z200 | Superficial injury of wrist NOS, infected                   |
| 43 | SD3zz00 | Superficial injury of lower arm, infected NOS               |
| 44 | SD41.00 | Abrasion or friction burn of hand, infected                 |
| 45 | SD43.00 | Blister of hand, infected                                   |
| 46 | SD45.00 | Insect bite, nonvenomous, of hand, infected                 |
| 47 | SD4z.00 | Superficial injury of hand NOS, infected                    |
| 48 | SD51.00 | Abrasion or friction burn of finger, infected               |
| 49 | SD53.00 | Blister of finger, infected                                 |
| 50 | SD55.00 | Insect bite, nonvenomous, of finger, infected               |
| 51 | SD5z.00 | Superficial injury of finger NOS, infected                  |
| 52 |         |                                                             |
| 53 |         |                                                             |
| 54 |         |                                                             |
| 55 |         |                                                             |
| 56 |         |                                                             |
| 57 |         |                                                             |
| 58 |         |                                                             |
| 59 |         |                                                             |
| 60 |         |                                                             |

|    |         |                                                          |
|----|---------|----------------------------------------------------------|
| 1  |         |                                                          |
| 2  | SD61.00 | Abrasion or friction burn of lower limb, infected        |
| 3  | SD61.11 | Abrasion or friction burn of leg, infected               |
| 4  | SD61000 | Abrasion of hip, infected                                |
| 5  | SD61100 | Abrasion of thigh, infected                              |
| 6  | SD61200 | Abrasion of knee, infected                               |
| 7  | SD61300 | Abrasion of lower leg, infected                          |
| 8  | SD61400 | Abrasion of ankle, infected                              |
| 9  |         |                                                          |
| 10 | SD61z00 | Abrasion or friction burn of lower limb, infected, NOS   |
| 11 | SD63.00 | Blister of lower limb, infected                          |
| 12 | SD63.11 | Blister of leg, infected                                 |
| 13 |         |                                                          |
| 14 | SD63000 | Blister of hip, infected                                 |
| 15 | SD63100 | Blister of thigh, infected                               |
| 16 | SD63200 | Blister of knee, infected                                |
| 17 | SD63300 | Blister of lower leg, infected                           |
| 18 | SD63400 | Blister of ankle, infected                               |
| 19 |         |                                                          |
| 20 | SD63z00 | Blister of lower limb, infected, NOS                     |
| 21 | SD65.00 | Insect bite, nonvenomous, of lower limb, infected        |
| 22 | SD65.11 | Insect bite, nonvenomous, of leg, infected               |
| 23 |         |                                                          |
| 24 | SD65000 | Insect bite, nonvenomous, of hip, infected               |
| 25 | SD65100 | Insect bite, nonvenomous, of thigh, infected             |
| 26 | SD65200 | Insect bite, nonvenomous, of knee, infected              |
| 27 | SD65300 | Insect bite, nonvenomous, of lower leg, infected         |
| 28 | SD65400 | Insect bite, nonvenomous, of ankle, infected             |
| 29 |         |                                                          |
| 30 | SD65z00 | Insect bite, nonvenomous, of lower limb, infected, NOS   |
| 31 | SD6z.00 | Superficial injury of lower limb, infected               |
| 32 | SD6z000 | Superficial injury of hip NOS, infected                  |
| 33 | SD6z100 | Superficial injury of thigh NOS, infected                |
| 34 | SD6z200 | Superficial injury of knee NOS, infected                 |
| 35 | SD6z300 | Superficial injury of lower leg NOS, infected            |
| 36 | SD6z400 | Superficial injury of ankle NOS, infected                |
| 37 |         |                                                          |
| 38 | SD6zz00 | Superficial injury of lower limb, infected, NOS          |
| 39 | SD71.00 | Abrasion or friction burn of foot and toe, infected      |
| 40 | SD71.11 | Abrasion or friction burn of heel, infected              |
| 41 | SD71.12 | Abrasion or friction burn of toenail, infected           |
| 42 |         |                                                          |
| 43 | SD71000 | Abrasion of foot, infected                               |
| 44 | SD71100 | Abrasion of toe, infected                                |
| 45 | SD71z00 | Abrasion or friction burn of foot and toe, infected, NOS |
| 46 | SD73.00 | Blister of foot and toe, infected                        |
| 47 | SD73.11 | Blister of heel, infected                                |
| 48 |         |                                                          |
| 49 | SD73000 | Blister of foot, infected                                |
| 50 | SD73100 | Blister of toe, infected                                 |
| 51 | SD73z00 | Blister of foot and toe, infected, NOS                   |
| 52 | SD75.00 | Insect bite, nonvenomous, of foot and toe, infected      |
| 53 | SD75.11 | Insect bite, nonvenomous, of heel, infected              |
| 54 |         |                                                          |
| 55 | SD75000 | Insect bite, nonvenomous, of foot, infected              |
| 56 | SD75100 | Insect bite, nonvenomous, of toe, infected               |
| 57 | SD75z00 | Insect bite, nonvenomous, of foot and toe, infected, NOS |
| 58 | SD7z.00 | Superficial injury of foot and toe NOS, infected         |
| 59 | SD7z000 | Superficial injury of foot NOS, infected                 |
| 60 | SD7z100 | Superficial injury of toe NOS, infected                  |

|    |         |                                                              |
|----|---------|--------------------------------------------------------------|
| 1  |         |                                                              |
| 2  | SD7zz00 | Superficial injury of foot and toe, infected, NOS            |
| 3  | SD91.00 | Abrasion or friction burn, infected, NOS                     |
| 4  | SD95.00 | Insect bite, nonvenomous, infected, NOS                      |
| 5  | SD96000 | Foreign body in skin wound                                   |
| 6  | SD99.00 | Tick bite, infected                                          |
| 7  | SD9z.00 | Other superficial injury, infected, NOS                      |
| 8  | SH...00 | Burns                                                        |
| 9  | SH1..00 | Burn of the face, head or neck                               |
| 10 | SH1..11 | Face burns                                                   |
| 11 | SH1..12 | Head burns                                                   |
| 12 | SH10.00 | Unspecified thickness burn of the face, head or neck         |
| 13 | SH10000 | Unspecified thickness burn of unspecified part of face/head  |
| 14 | SH10100 | Unspecified thickness burn of the ear                        |
| 15 | SH10200 | Unspecified thickness burn of the eye                        |
| 16 | SH10300 | Unspecified thickness burn of the lip(s)                     |
| 17 | SH10400 | Unspecified thickness burn of the chin                       |
| 18 | SH10500 | Unspecified thickness burn of the nose                       |
| 19 | SH10600 | Unspecified thickness burn of the scalp                      |
| 20 | SH10700 | Unspecified thickness burn of the forehead                   |
| 21 | SH10800 | Unspecified thickness burn of the cheek                      |
| 22 | SH10900 | Unspecified thickness burn of the neck                       |
| 23 | SH10x00 | Unspecified thickness burn multiple sites face, head or neck |
| 24 | SH10z00 | Unspecified thickness burn of the face, head or neck NOS     |
| 25 | SH11.00 | Superficial burn of the face, head or neck                   |
| 26 | SH11.11 | Erythema of head or neck, first degree burn                  |
| 27 | SH11000 | Superficial burn of unspecified part of the face or head     |
| 28 | SH11100 | Superficial burn of the ear                                  |
| 29 | SH11200 | Superficial burn of the eye                                  |
| 30 | SH11300 | Superficial burn of the lip(s)                               |
| 31 | SH11400 | Superficial burn of the chin                                 |
| 32 | SH11500 | Superficial burn of the nose                                 |
| 33 | SH11600 | Superficial burn of the scalp                                |
| 34 | SH11700 | Superficial burn of the forehead                             |
| 35 | SH11800 | Superficial burn of the cheek                                |
| 36 | SH11900 | Superficial burn of the neck                                 |
| 37 | SH11x00 | Superficial burn of multiple sites of the face, head or neck |
| 38 | SH11z00 | Superficial burn of the face, head or neck NOS               |
| 39 | SH12.00 | Partial thickness burn of the face, head or neck             |
| 40 | SH12.11 | Blister of face, head and neck, second degree burn           |
| 41 | SH12000 | Superficial part. thickness burn unspecified part face/head  |
| 42 | SH12100 | Superficial partial thickness burn of the ear                |
| 43 | SH12111 | Ear - 2nd degree burn                                        |
| 44 | SH12200 | Superficial partial thickness burn of the eye                |
| 45 | SH12211 | Eye - 2nd degree burn                                        |
| 46 | SH12300 | Superficial partial thickness burn of the lip(s)             |
| 47 | SH12311 | Lip - 2nd degree burn                                        |
| 48 | SH12400 | Superficial partial thickness burn of the chin               |
| 49 | SH12411 | Chin - 2nd degree burn                                       |
| 50 | SH12500 | Superficial partial thickness burn of the nose               |
| 51 | SH12511 | Nose - 2nd degree burn                                       |
| 52 |         |                                                              |
| 53 |         |                                                              |
| 54 |         |                                                              |
| 55 |         |                                                              |
| 56 |         |                                                              |
| 57 |         |                                                              |
| 58 |         |                                                              |
| 59 |         |                                                              |
| 60 |         |                                                              |

|    |         |                                                              |
|----|---------|--------------------------------------------------------------|
| 1  |         |                                                              |
| 2  | SH12600 | Superficial partial thickness burn of the scalp              |
| 3  | SH12611 | Scalp - 2nd degree burn                                      |
| 4  | SH12700 | Superficial partial thickness burn of the forehead           |
| 5  | SH12711 | Forehead - 2nd degree burn                                   |
| 6  | SH12800 | Superficial partial thickness burn of the cheek              |
| 7  | SH12811 | Cheek - 2nd degree burn                                      |
| 8  | SH12900 | Superficial partial thickness burn of the neck               |
| 9  | SH12911 | Neck - 2nd degree burn                                       |
| 10 |         |                                                              |
| 11 | SH12A00 | Deep partial thickness burn of unspecified part of face/head |
| 12 | SH12B00 | Deep partial thickness burn of the ear                       |
| 13 | SH12C00 | Deep partial thickness burn of the eye                       |
| 14 | SH12D00 | Deep partial thickness burn of the lip(s)                    |
| 15 | SH12E00 | Deep partial thickness burn of the chin                      |
| 16 | SH12F00 | Deep partial thickness burn of the nose                      |
| 17 | SH12G00 | Deep partial thickness burn of the scalp                     |
| 18 | SH12H00 | Deep partial thickness burn of the forehead                  |
| 19 | SH12J00 | Deep partial thickness burn of the cheek                     |
| 20 | SH12K00 | Deep partial thickness burn of the neck                      |
| 21 | SH12x00 | Partial thickness burn of multiple sites face, head or neck  |
| 22 | SH12z00 | Partial thickness burn of the face, head or neck NOS         |
| 23 | SH13.00 | Full thickness burn of the face, head or neck                |
| 24 | SH13000 | Full thickness burn of unspecified part of the face or head  |
| 25 | SH13100 | Full thickness burn of the ear                               |
| 26 | SH13200 | Full thickness burn of the eye                               |
| 27 | SH13300 | Full thickness burn of the lip(s)                            |
| 28 | SH13400 | Full thickness burn of the chin                              |
| 29 | SH13500 | Full thickness burn of the nose                              |
| 30 | SH13600 | Full thickness burn of the scalp                             |
| 31 | SH13700 | Full thickness burn of the forehead                          |
| 32 | SH13800 | Full thickness burn of the cheek                             |
| 33 | SH13900 | Full thickness burn of the neck                              |
| 34 | SH13A00 | Corrosion of third degree of head and neck                   |
| 35 | SH13x00 | Full thickness burn of multiple sites of face, head or neck  |
| 36 | SH13z00 | Full thickness burn of the face, head or neck NOS            |
| 37 | SH14.00 | Deep full thick burn face/head/neck - without loss body part |
| 38 | SH14000 | Deep full thick burn unspec.part face/head-no loss body part |
| 39 | SH14100 | Deep full thickness burn of ear without loss of body part    |
| 40 | SH14200 | Deep full thickness burn of eye without loss of body part    |
| 41 | SH14300 | Deep full thickness burn of lip(s) without loss of body part |
| 42 | SH14400 | Deep full thickness burn of chin without loss of body part   |
| 43 | SH14500 | Deep full thickness burn of nose without loss of body part   |
| 44 | SH14600 | Deep full thickness burn of scalp without loss of body part  |
| 45 | SH14700 | Deep full thickness burn forehead without loss of body part  |
| 46 | SH14800 | Deep full thickness burn of cheek without loss of body part  |
| 47 | SH14900 | Deep full thickness burn of neck without loss of body part   |
| 48 | SH14x00 | Deep full thickness burn multip sites face/head/neck- no BPL |
| 49 | SH14z00 | Deep full thick burn, no loss body part, face/head/neck NOS  |
| 50 | SH15.00 | Deep full thick burn face/head/neck, with loss of body part  |
| 51 | SH15000 | Deep full thickness burn unspec part of face/head, with BPL  |
| 52 | SH15100 | Deep full thickness burn of the ear, with loss of body part  |
| 53 |         |                                                              |
| 54 |         |                                                              |
| 55 |         |                                                              |
| 56 |         |                                                              |
| 57 |         |                                                              |
| 58 |         |                                                              |
| 59 |         |                                                              |
| 60 |         |                                                              |

|    |         |                                                              |
|----|---------|--------------------------------------------------------------|
| 1  |         |                                                              |
| 2  | SH15200 | Deep full thickness burn of the eye, with loss of body part  |
| 3  | SH15300 | Deep full thickness burn of lip(s), with loss of body part   |
| 4  | SH15400 | Deep full thickness burn of the chin, with loss of body part |
| 5  | SH15500 | Deep full thickness burn of the nose, with loss of body part |
| 6  | SH15600 | Deep full thickness burn of scalp, with loss of body part    |
| 7  | SH15700 | Deep full thickness burn of forehead, with loss of body part |
| 8  | SH15800 | Deep full thickness burn of cheek, with loss of body part    |
| 9  | SH15900 | Deep full thickness burn of the neck, with loss of body part |
| 10 | SH15x00 | Deep full thick burn multip parts face/head/neck - with BPL  |
| 11 | SH15z00 | Deep full thick burn, with loss body part,face/head/neck NOS |
| 12 | SH16.00 | Corrosion of head and neck                                   |
| 13 | SH16000 | Corrosion of first degree of head and neck                   |
| 14 | SH16100 | Corrosion of second degree of head and neck                  |
| 15 | SH1z.00 | Burn of the face, head or neck NOS                           |
| 16 | SH2..00 | Burn of the trunk                                            |
| 17 | SH20.00 | Unspecified thickness burn of the trunk                      |
| 18 | SH20000 | Unspecified thickness burn of unspecified part of the trunk  |
| 19 | SH20100 | Unspecified thickness burn of the breast                     |
| 20 | SH20200 | Unspecified thickness burn of the chest wall                 |
| 21 | SH20300 | Unspecified thickness burn of the abdominal wall             |
| 22 | SH20400 | Unspecified thickness burn of the back (excluding buttock)   |
| 23 | SH20500 | Unspecified thickness burn of the buttock                    |
| 24 | SH20600 | Unspecified thickness burn of the genitalia                  |
| 25 | SH20x00 | Unspecified thickness burn of multiple sites of the trunk    |
| 26 | SH20z00 | Unspecified thickness burn of the trunk NOS                  |
| 27 | SH21.00 | Superficial burn of the trunk                                |
| 28 | SH21.11 | Erythema of trunk, 1st degree burn                           |
| 29 | SH21000 | Superficial burn of unspecified part of the trunk            |
| 30 | SH21100 | Superficial burn of the breast                               |
| 31 | SH21200 | Superficial burn of the chest wall                           |
| 32 | SH21300 | Superficial burn of the abdominal wall                       |
| 33 | SH21400 | Superficial burn of the back (excluding buttock)             |
| 34 | SH21500 | Superficial burn of the buttock                              |
| 35 | SH21600 | Superficial burn of the genitalia                            |
| 36 | SH21700 | Corrosion of first degree of trunk                           |
| 37 | SH21x00 | Superficial burn of multiple sites of the trunk              |
| 38 | SH21z00 | Superficial burn of the trunk NOS                            |
| 39 | SH22.00 | Partial thickness burn of the trunk                          |
| 40 | SH22.11 | Blister of trunk, second degree burn                         |
| 41 | SH22000 | Superficial partial thickness burn unspecified part of trunk |
| 42 | SH22100 | Superficial partial thickness burn of the breast             |
| 43 | SH22200 | Superficial partial thickness burn of the chest wall         |
| 44 | SH22300 | Superficial partial thickness burn of the abdominal wall     |
| 45 | SH22400 | Superficial partial thickness burn of back (excl buttock)    |
| 46 | SH22500 | Superficial partial thickness burn of the buttock            |
| 47 | SH22600 | Superficial partial thickness burn of the genitalia          |
| 48 | SH22700 | Deep partial thickness burn of the trunk, unspecified        |
| 49 | SH22800 | Deep partial thickness burn of the breast                    |
| 50 | SH22900 | Deep partial thickness burn of the chest wall                |
| 51 | SH22A00 | Deep partial thickness burn of the abdominal wall            |

|    |         |                                                              |
|----|---------|--------------------------------------------------------------|
| 1  |         |                                                              |
| 2  | SH22B00 | Deep partial thickness burn of the back (excluding buttock)  |
| 3  | SH22C00 | Deep partial thickness burn of the buttock                   |
| 4  | SH22D00 | Deep partial thickness burn of the genitalia                 |
| 5  | SH22E00 | Corrosion of second degree of trunk                          |
| 6  | SH22x00 | Partial thickness burn of multiple sites of the trunk        |
| 7  | SH22z00 | Partial thickness burn of the trunk NOS                      |
| 8  | SH23.00 | Full thickness burn of the trunk                             |
| 9  | SH23000 | Full thickness burn of the trunk, unspecified                |
| 10 | SH23100 | Full thickness burn of the breast                            |
| 11 | SH23200 | Full thickness burn of the chest wall                        |
| 12 | SH23300 | Full thickness burn of the abdominal wall                    |
| 13 | SH23400 | Full thickness burn of the back (excluding buttock)          |
| 14 | SH23500 | Full thickness burn of the buttock                           |
| 15 | SH23600 | Full thickness burn of the genitalia                         |
| 16 | SH23700 | Corrosion of third degree of trunk                           |
| 17 | SH23x00 | Full thickness burn of multiple sites of the trunk           |
| 18 | SH23z00 | Full thickness burn of the trunk NOS                         |
| 19 | SH24.00 | Deep full thickness burn of trunk without loss of body part  |
| 20 | SH24000 | Deep full thickness burn of trunk unsp, no loss of body part |
| 21 | SH24100 | Deep full thickness burn of breast without loss of body part |
| 22 | SH24200 | Deep full thickness burn of chest without loss of body part  |
| 23 | SH24300 | Deep full thickness burn of abdom.wall, no loss of body part |
| 24 | SH24400 | Deep full thickness burn of back without loss of body part   |
| 25 | SH24500 | Deep full thickness burn of buttock, no loss of body part    |
| 26 | SH24600 | Deep full thickness burn of genitalia, no loss of body part  |
| 27 | SH24x00 | Deep full thickness burn multiple sites trunk, no BPL        |
| 28 | SH24z00 | Deep full thickness burn of trunk, no loss of body part NOS  |
| 29 | SH25.00 | Deep full thickness burn of trunk, with loss of body part    |
| 30 | SH25000 | Deep full thickness burn of trunk unsp, with loss body part  |
| 31 | SH25100 | Deep full thickness burn of breast, with loss of body part   |
| 32 | SH25200 | Deep full thickness burn of chest, with loss of body part    |
| 33 | SH25300 | Deep full thickness burn of abd.wall, with loss of body part |
| 34 | SH25400 | Deep full thickness burn of back, with loss of body part     |
| 35 | SH25500 | Deep full thickness burn of buttock, with loss of body part  |
| 36 | SH25600 | Deep full thickness burn of genitalia, with loss body part   |
| 37 | SH25x00 | Deep full thickness burn multiple sites trunk with BPL       |
| 38 | SH25z00 | Deep full thickness burn of trunk, with loss body part, NOS  |
| 39 | SH26.00 | Corrosion of unspecified degree of trunk                     |
| 40 | SH2z.00 | Burn of the trunk NOS                                        |
| 41 | SH3..00 | Burn of the arm (excluding wrist and hand)                   |
| 42 | SH30.00 | Unspecified thickness burn of the arm                        |
| 43 | SH30000 | Unspecified thickness burn of the arm, unspecified           |
| 44 | SH30100 | Unspecified thickness burn of the forearm                    |
| 45 | SH30200 | Unspecified thickness burn of the elbow                      |
| 46 | SH30300 | Unspecified thickness burn of the upper arm                  |
| 47 | SH30400 | Unspecified thickness burn of the axilla                     |
| 48 | SH30500 | Unspecified thickness burn of the shoulder                   |
| 49 | SH30600 | Unspecified thickness burn of the scapular region            |
| 50 | SH30x00 | Unspecified thickness burn of multiple sites of the arm      |
| 51 | SH30z00 | Unspecified thickness burn of the arm NOS                    |
| 52 |         |                                                              |
| 53 |         |                                                              |
| 54 |         |                                                              |
| 55 |         |                                                              |
| 56 |         |                                                              |
| 57 |         |                                                              |
| 58 |         |                                                              |
| 59 |         |                                                              |
| 60 |         |                                                              |



|    |         |                                                              |
|----|---------|--------------------------------------------------------------|
| 1  |         |                                                              |
| 2  | SH31.00 | Superficial burn of the arm                                  |
| 3  | SH31.11 | Erythema of arm, first degree burn                           |
| 4  | SH31000 | Superficial burn of the arm, unspecified                     |
| 5  | SH31100 | Superficial burn of the forearm                              |
| 6  | SH31200 | Superficial burn of the elbow                                |
| 7  | SH31300 | Superficial burn of the upper arm                            |
| 8  | SH31400 | Superficial burn of the axilla                               |
| 9  | SH31500 | Superficial burn of the shoulder                             |
| 10 | SH31600 | Superficial burn of the scapular region                      |
| 11 | SH31600 | Superficial burn of the scapular region                      |
| 12 | SH31x00 | Superficial burn of multiple sites of the arm                |
| 13 | SH31z00 | Superficial burn of the arm NOS                              |
| 14 | SH32.00 | Partial thickness burn of the arm                            |
| 15 | SH32.11 | Blister of arm, second degree burn                           |
| 16 | SH32000 | Superficial partial thickness burn of the arm, unspecified   |
| 17 | SH32100 | Superficial partial thickness burn of the forearm            |
| 18 | SH32200 | Superficial partial thickness burn of the elbow              |
| 19 | SH32300 | Superficial partial thickness burn of the upper arm          |
| 20 | SH32400 | Superficial partial thickness burn of the axilla             |
| 21 | SH32500 | Superficial partial thickness burn of the shoulder           |
| 22 | SH32600 | Superficial partial thickness burn of scapular region        |
| 23 | SH32700 | Deep partial thickness burn of the arm, unspecified          |
| 24 | SH32800 | Deep partial thickness burn of the forearm                   |
| 25 | SH32900 | Deep partial thickness burn of the elbow                     |
| 26 | SH32A00 | Deep partial thickness burn of the upper arm                 |
| 27 | SH32B00 | Deep partial thickness burn of the axilla                    |
| 28 | SH32C00 | Deep partial thickness burn of the shoulder                  |
| 29 | SH32D00 | Deep partial thickness burn of the scapular region           |
| 30 | SH32x00 | Partial thickness burn of multiple sites of the arm          |
| 31 | SH32z00 | Partial thickness burn of the arm NOS                        |
| 32 | SH33.00 | Full thickness burn of the arm                               |
| 33 | SH33000 | Full thickness burn of the arm, unspecified                  |
| 34 | SH33100 | Full thickness burn of the forearm                           |
| 35 | SH33200 | Full thickness burn of the elbow                             |
| 36 | SH33300 | Full thickness burn of the upper arm                         |
| 37 | SH33400 | Full thickness burn of the axilla                            |
| 38 | SH33500 | Full thickness burn of the shoulder                          |
| 39 | SH33600 | Full thickness burn of the scapular region                   |
| 40 | SH33x00 | Full thickness burn of multiple sites of the arm             |
| 41 | SH33z00 | Full thickness burn of the arm NOS                           |
| 42 | SH34.00 | Deep full thickness burn of arm without loss of body part    |
| 43 | SH34000 | Deep full thickness burn of arm unsp, no loss of body part   |
| 44 | SH34100 | Deep full thickness burn of forearm, no loss of body part    |
| 45 | SH34200 | Deep full thickness burn of elbow without loss of body part  |
| 46 | SH34300 | Deep full thickness burn of upper arm, no loss of body part  |
| 47 | SH34400 | Deep full thickness burn of axilla without loss of body part |
| 48 | SH34500 | Deep full thickness burn of shoulder, no loss of body part   |
| 49 | SH34600 | Deep full thickness burn of scapular, no loss of body part   |
| 50 | SH34x00 | Deep full thickness burn of multiple sites of arm, no BPL    |
| 51 | SH34z00 | Deep full thickness burn without loss of body part-arm NOS   |
| 52 | SH35.00 | Deep full thickness burn of arm, with loss of body part      |
| 53 |         |                                                              |
| 54 |         |                                                              |
| 55 |         |                                                              |
| 56 |         |                                                              |
| 57 |         |                                                              |
| 58 |         |                                                              |
| 59 |         |                                                              |
| 60 |         |                                                              |

|    |         |                                                              |
|----|---------|--------------------------------------------------------------|
| 1  |         |                                                              |
| 2  | SH35000 | Deep full thickness burn of arm unsp, with loss of body part |
| 3  | SH35100 | Deep full thickness burn of forearm, with loss of body part  |
| 4  | SH35200 | Deep full thickness burn of elbow, with loss of body part    |
| 5  | SH35300 | Deep full thickness burn of upper arm,with loss of body part |
| 6  | SH35400 | Deep full thickness burn of axilla, with loss of body part   |
| 7  | SH35500 | Deep full thickness burn of shoulder, with loss of body part |
| 8  | SH35600 | Deep full thickness burn of scapular, with loss of body part |
| 9  | SH35x00 | Deep full thickness burn of multiple sites of arm with BPL   |
| 10 | SH35z00 | Deep full thickness burn-, with loss of body part-arm NOS    |
| 11 | SH36.00 | Corros/unspecf degree/shoulder+upper limb,except wrist+hand  |
| 12 | SH36000 | Corrosion/1st degree shoulder+upper limb,except wrist+hand   |
| 13 | SH36100 | Corrosion/2nd degree/shoulder and upper limb exc wrist+hand  |
| 14 | SH36200 | Corros/third degree/shoulder and upper limb, exc wrist+hand  |
| 15 | SH3z.00 | Burn of the arm (excluding wrist and hand) NOS               |
| 16 | SH4..00 | Burn of the wrist(s) and hand(s)                             |
| 17 | SH40.00 | Unspecified thickness burn of the wrist and hand             |
| 18 | SH40.11 | Unspecified degree burn of finger                            |
| 19 | SH40.12 | Unspecified degree burn of hand                              |
| 20 | SH40.13 | Unspecified degree burn of thumb                             |
| 21 | SH40.14 | Unspecified degree burn of wrist                             |
| 22 | SH40000 | Unspecified thickness burn of the hand, unspecified          |
| 23 | SH40100 | Unspecified thickness burn of a single finger                |
| 24 | SH40200 | Unspecified thickness burn of the thumb                      |
| 25 | SH40300 | Unspecified thickness burn of more than one finger           |
| 26 | SH40400 | Unspecified thickness burn of the thumb and finger(s)        |
| 27 | SH40500 | Unspecified thickness burn of the palm of hand               |
| 28 | SH40600 | Unspecified thickness burn of the back of hand               |
| 29 | SH40700 | Unspecified thickness burn of the wrist                      |
| 30 | SH40x00 | Unspecified thickness burn of multiple sites of wrist/hand   |
| 31 | SH40z00 | Unspecified thickness burn of the wrist or hand NOS          |
| 32 | SH41.00 | Superficial burn of the wrist and hand                       |
| 33 | SH41.11 | Erythema of wrist and hand,first degree burn                 |
| 34 | SH41.12 | First degree burn of finger                                  |
| 35 | SH41.13 | First degree burn of hand                                    |
| 36 | SH41.14 | First degree burn of thumb                                   |
| 37 | SH41.15 | First degree burn of wrist                                   |
| 38 | SH41000 | Superficial burn of the hand, unspecified                    |
| 39 | SH41100 | Superficial burn of a single finger                          |
| 40 | SH41200 | Superficial burn of the thumb                                |
| 41 | SH41300 | Superficial burn of more than one finger                     |
| 42 | SH41400 | Superficial burn of the thumb and finger(s)                  |
| 43 | SH41500 | Superficial burn of the palm of hand                         |
| 44 | SH41600 | Superficial burn of the back of hand                         |
| 45 | SH41700 | Superficial burn of the wrist                                |
| 46 | SH41x00 | First degree burn of multiple sites of the wrist or hand     |
| 47 | SH41z00 | Superficial burn of the wrist or hand NOS                    |
| 48 | SH42.00 | Partial thickness burn of the wrist and hand                 |
| 49 | SH42.11 | Blister of wrist and hand, second degree burn                |
| 50 | SH42.12 | Second degree burn of finger                                 |
| 51 | SH42.13 | Second degree burn of hand                                   |



|    |         |                                                               |
|----|---------|---------------------------------------------------------------|
| 1  |         |                                                               |
| 2  | SH42.14 | Second degree burn of thumb                                   |
| 3  | SH42.15 | Second degree burn of wrist                                   |
| 4  | SH42000 | Superficial partial thickness burn of hand, unspecified       |
| 5  | SH42100 | Superficial partial thickness burn of a single finger         |
| 6  | SH42200 | Superficial partial thickness burn of the thumb               |
| 7  | SH42300 | Superficial partial thickness burn of more than one finger    |
| 8  | SH42400 | Superficial partial thickness burn of thumb and finger(s)     |
| 9  | SH42500 | Superficial partial thickness burn of palm of hand            |
| 10 | SH42600 | Superficial partial thickness burn of back of hand            |
| 11 | SH42700 | Superficial partial thickness burn of the wrist               |
| 12 | SH42800 | Deep partial thickness burn of the hand, unspecified          |
| 13 | SH42900 | Deep partial thickness burn of a single finger                |
| 14 | SH42A00 | Deep partial thickness burn of the thumb                      |
| 15 | SH42B00 | Deep partial thickness burn of more than one finger           |
| 16 | SH42C00 | Deep partial thickness burn of the thumb and finger(s)        |
| 17 | SH42D00 | Deep partial thickness burn of the palm of hand               |
| 18 | SH42E00 | Deep partial thickness burn of back of hand                   |
| 19 | SH42F00 | Deep partial thickness burn of wrist                          |
| 20 | SH42x00 | Partial thickness burn of multiple sites of the wrist/hand    |
| 21 | SH42z00 | Partial thickness burn of the wrist or hand NOS               |
| 22 | SH43.00 | Full thickness burn of the wrist and hand                     |
| 23 | SH43.11 | Third degree burn of finger                                   |
| 24 | SH43.12 | Third degree burn of hand                                     |
| 25 | SH43.13 | Third degree burn of thumb                                    |
| 26 | SH43.14 | Third degree burn of wrist                                    |
| 27 | SH43000 | Full thickness burn of the hand, unspecified                  |
| 28 | SH43100 | Full thickness burn of a single finger                        |
| 29 | SH43200 | Full thickness burn of the thumb                              |
| 30 | SH43300 | Full thickness burn of more than one finger                   |
| 31 | SH43400 | Full thickness burn of the thumb and finger(s)                |
| 32 | SH43500 | Full thickness burn of the palm of hand                       |
| 33 | SH43600 | Full thickness burn of the back of hand                       |
| 34 | SH43700 | Full thickness burn of the wrist                              |
| 35 | SH43x00 | Full thickness burn of multiple sites of the wrist or hand    |
| 36 | SH43z00 | Full thickness burn of the wrist or hand NOS                  |
| 37 | SH44.00 | Deep full thickness burn of wrist/hand, no loss of body part  |
| 38 | SH44.11 | Deep third degree burn of finger, without loss of a body part |
| 39 | SH44.12 | Deep third degree burn of hand, without loss of a body part   |
| 40 | SH44.13 | Deep third degree burn of thumb, without loss of a body part  |
| 41 | SH44.14 | Deep third degree burn of wrist, without loss of a body part  |
| 42 | SH44000 | Deep full thickness burn of hand unsp, no loss of body part   |
| 43 | SH44100 | Deep full thickness burn of a finger, no loss of body part    |
| 44 | SH44200 | Deep full thickness burn of thumb without loss of body part   |
| 45 | SH44300 | Deep full thickness burn of >1 finger, no loss of body part   |
| 46 | SH44400 | Deep full thickness burn of thumb+fing, no loss of body part  |
| 47 | SH44500 | Deep full thickness burn of palm hand, no loss of body part   |
| 48 | SH44600 | Deep full thickness burn of back hand, no loss of body part   |
| 49 | SH44700 | Deep full thickness burn of wrist without loss of body part   |
| 50 | SH44x00 | Deep full thickness burn-multiple sites wrist/hand, no BPL    |
| 51 | SH44z00 | Deep full thickness burn of wrist/hand, no loss body part NOS |

|    |         |                                                              |
|----|---------|--------------------------------------------------------------|
| 1  |         |                                                              |
| 2  | SH45.00 | Deep full thickness burn of wrist/hand, with loss body part  |
| 3  | SH45.11 | Deep third degree burn of finger with loss of a body part    |
| 4  | SH45.12 | Deep third degree burn of hand with loss of a body part      |
| 5  | SH45.13 | Deep third degree burn of thumb with loss of a body part     |
| 6  | SH45.14 | Deep third degree burn of wrist with loss of a body part     |
| 7  | SH45000 | Deep full thickness burn of hand unsp, with loss body part   |
| 8  | SH45100 | Deep full thickness burn of a finger, with loss of body part |
| 9  | SH45200 | Deep full thickness burn of thumb, with loss of body part    |
| 10 | SH45300 | Deep full thickness burn of >1 finger, with loss body part   |
| 11 | SH45400 | Deep full thickness burn of thumb+fing, with loss body part  |
| 12 | SH45500 | Deep full thickness burn of palm hand, with loss body part   |
| 13 | SH45600 | Deep full thickness burn of back hand, with loss body part   |
| 14 | SH45700 | Deep full thickness burn of wrist, with loss of body part    |
| 15 | SH45x00 | Deep full thickness burn-multiple sites wrist/hand with BPL  |
| 16 | SH45z00 | Deep full thickness burn wrist/hand, with loss body part NOS |
| 17 | SH46.00 | Corrosion of wrist and hand                                  |
| 18 | SH46000 | Corrosion of first degree of wrist and hand                  |
| 19 | SH46100 | Corrosion of second degree of wrist and hand                 |
| 20 | SH46200 | Corrosion of third degree of wrist and hand                  |
| 21 | SH4z.00 | Burn of wrist or hand NOS                                    |
| 22 | SH5..00 | Burn of lower limbs                                          |
| 23 | SH5..11 | Leg burns                                                    |
| 24 | SH50.00 | Unspecified thickness burn of the leg                        |
| 25 | SH50000 | Unspecified degree burn of the leg, unspecified              |
| 26 | SH50100 | Unspecified thickness burn of the toe(s)                     |
| 27 | SH50200 | Unspecified thickness burn of the foot                       |
| 28 | SH50300 | Unspecified thickness burn of the ankle                      |
| 29 | SH50400 | Unspecified thickness burn of the lower leg                  |
| 30 | SH50500 | Unspecified thickness burn of the knee                       |
| 31 | SH50600 | Unspecified thickness burn of the thigh                      |
| 32 | SH50x00 | Unspecified thickness burn of multiple sites of the leg      |
| 33 | SH50z00 | Unspecified thickness burn of the leg NOS                    |
| 34 | SH51.00 | Superficial burn of the leg                                  |
| 35 | SH51.11 | Erythema of leg, first degree burn                           |
| 36 | SH51000 | Superficial burn of the leg, unspecified                     |
| 37 | SH51100 | Superficial burn of the toe(s)                               |
| 38 | SH51200 | Superficial burn of the foot                                 |
| 39 | SH51300 | Superficial burn of the ankle                                |
| 40 | SH51400 | Superficial burn of the lower leg                            |
| 41 | SH51500 | Superficial burn of the knee                                 |
| 42 | SH51600 | Superficial burn of the thigh                                |
| 43 | SH51x00 | Superficial burn of multiple sites of the leg                |
| 44 | SH51z00 | Superficial burn of the leg NOS                              |
| 45 | SH52.00 | Partial thickness burn of the leg                            |
| 46 | SH52.11 | Blister of leg, second degree burn                           |
| 47 | SH52000 | Superficial partial thickness burn of the leg, unspecified   |
| 48 | SH52100 | Superficial partial thickness burn of the toe(s)             |
| 49 | SH52200 | Superficial partial thickness burn of the foot               |
| 50 | SH52300 | Superficial partial thickness burn of the ankle              |
| 51 | SH52400 | Superficial partial thickness burn of the lower leg          |

1  
2  
3  
4  
5  
6  
7  
8  
9  
10  
11  
12  
13  
14  
15  
16  
17  
18  
19  
20  
21  
22  
23  
24  
25  
26  
27  
28  
29  
30  
31  
32  
33  
34  
35  
36  
37  
38  
39  
40  
41  
42  
43  
44  
45  
46  
47  
48  
49  
50  
51  
52  
53  
54  
55  
56  
57  
58  
59  
60

|         |                                                              |
|---------|--------------------------------------------------------------|
| SH52500 | Superficial partial thickness burn of the knee               |
| SH52600 | Superficial partial thickness burn of the thigh              |
| SH52700 | Deep partial thickness burn of the leg, unspecified          |
| SH52800 | Deep partial thickness burn of the toe(s)                    |
| SH52900 | Deep partial thickness burn of the foot                      |
| SH52A00 | Deep partial thickness burn of the ankle                     |
| SH52B00 | Deep partial thickness burn of the lower leg                 |
| SH52C00 | Deep partial thickness burn of the knee                      |
| SH52D00 | Deep partial thickness burn of the thigh                     |
| SH52x00 | Partial thickness burn of multiple sites of the leg          |
| SH52z00 | Partial thickness burn of the leg NOS                        |
| SH53.00 | Full thickness burn of the leg                               |
| SH53000 | Full thickness burn of the leg, unspecified                  |
| SH53100 | Full thickness burn of the toe(s)                            |
| SH53200 | Full thickness burn of the foot                              |
| SH53300 | Full thickness burn of the ankle                             |
| SH53400 | Full thickness burn of the lower leg                         |
| SH53500 | Full thickness burn of the knee                              |
| SH53600 | Full thickness burn of the thigh                             |
| SH53x00 | Full thickness burn of multiple sites of the leg             |
| SH53z00 | Full thickness burn of the leg NOS                           |
| SH54.00 | Deep full thickness burn of leg without loss of body part    |
| SH54000 | Deep full thickness burn of leg unsp, no loss of body part   |
| SH54100 | Deep full thickness burn of toe(s) without loss of body part |
| SH54200 | Deep full thickness burn of foot without loss of body part   |
| SH54300 | Deep full thickness burn of ankle without loss of body part  |
| SH54400 | Deep full thickness burn of lower leg without loss of body   |
| SH54500 | Deep full thickness burn of knee without loss of body part   |
| SH54600 | Deep full thickness burn of thigh without loss of body part  |
| SH54x00 | Deep full thickness burn-mult.leg without loss of body part  |
| SH54z00 | Deep full thickness burn, no loss of body part, of leg NOS   |
| SH55.00 | Deep full thickness burn of leg, with loss of body part      |
| SH55000 | Deep full thickness burn of leg unsp, with loss body part    |
| SH55100 | Deep full thickness burn of toe(s), with loss of body part   |
| SH55200 | Deep full thickness burn of foot, with loss of body part     |
| SH55300 | Deep full thickness burn of ankle, with loss of body part    |
| SH55400 | Deep full thickness burn of lower leg, with loss body part   |
| SH55500 | Deep full thickness burn of knee, with loss of body part     |
| SH55600 | Deep full thickness burn of thigh, with loss of body part    |
| SH55x00 | Deep full thickness burn-mult.leg, with loss of body part    |
| SH55z00 | Deep full thickness burn, with loss of body part, of leg NOS |
| SH56.00 | Burn and corrosion of hip and lower limb,except ankle & foot |
| SH56000 | Corrosion of first degree of hip+lower limb,exc ankle + foot |
| SH56100 | Corrosion/2nd degree/hip+lower limb,except ankle & foot      |
| SH56200 | Corrosion/third degree/hip+lower limb except ankle and foot  |
| SH57.00 | Corrosion of ankle and foot                                  |
| SH57000 | Corrosion of first degree of ankle and foot                  |
| SH57100 | Corrosion of second degree of ankle and foot                 |
| SH57200 | Corrosion of third degree of ankle and foot                  |
| SH5z.00 | Burn of the lower limb NOS                                   |

|    |         |                                                              |
|----|---------|--------------------------------------------------------------|
| 1  |         |                                                              |
| 2  | SH6..00 | Burn of multiple specified sites                             |
| 3  | SH60.00 | Unspecified thickness burn of multiple specified sites       |
| 4  | SH61.00 | Superficial burn of multiple specified sites                 |
| 5  | SH62.00 | Partial thickness burn of multiple specified sites           |
| 6  |         |                                                              |
| 7  | SH62000 | Superficial partial thickness burn multiple specified sites  |
| 8  | SH62100 | Deep partial thickness burn of multiple specified sites      |
| 9  | SH63.00 | Full thickness burn of multiple specified sites              |
| 10 |         |                                                              |
| 11 | SH64.00 | Deep full thickness burn multiple specified sites, no BPL    |
| 12 | SH65.00 | Deep full thickness burn multiple specified sites, with BPL  |
| 13 | SH66.00 | Corrosions of multiple regions, unspecified degree           |
| 14 | SH66000 | Corros/multiple reg,no more than first-deg corros mentioned  |
| 15 | SH66100 | Corrosion/multi reg,no more than second-deg corros mentioned |
| 16 | SH66300 | Corros/multi reg,at least one corros/third degree mentioned  |
| 17 |         |                                                              |
| 18 | SH6z.00 | Burn of multiple specified sites NOS                         |
| 19 | SH8..00 | Burns as a percentage of body surface (BS) involved          |
| 20 | SH80.00 | Burn involving <10% of body surface (BS)                     |
| 21 | SH80000 | Burn:<10% of body surface, 10%/unspec BS full thickness      |
| 22 | SH80100 | Corrosions involving less than 10% of body surface           |
| 23 |         |                                                              |
| 24 | SH80z00 | Burn:<10% of body surface NOS                                |
| 25 | SH81.00 | Burn involving 10-19% of body surface (BS)                   |
| 26 | SH81000 | Burn: 10-14% of body surface,<10%/unsp BS full thickness     |
| 27 | SH81100 | Burn: 10-14% of body surface, 10-14% BS full thickness       |
| 28 | SH81200 | Burn: 15-19% of body surface,<10%/unsp BS full thickness     |
| 29 | SH81300 | Burn: 15-19% of body surface, 10-19% BS full thickness       |
| 30 | SH81400 | Corrosions involving 10-19% of body surface                  |
| 31 |         |                                                              |
| 32 | SH81z00 | Burn: 10-19% of body surface NOS                             |
| 33 | SH82.00 | Burn involving 20-29% of body surface (BS)                   |
| 34 |         |                                                              |
| 35 | SH82000 | Burn: 20-29% of body surface,<10%/unspec BS full thickness   |
| 36 | SH82100 | Burn: 20-29% of body surface, 10-19% BS full thickness       |
| 37 | SH82200 | Burn: 20-29% of body surface, 20-29% BS full thickness       |
| 38 | SH82300 | Corrosions involving 20-29% of body surface                  |
| 39 | SH82z00 | Burn: 20-29% of body surface NOS                             |
| 40 |         |                                                              |
| 41 | SH83.00 | Burn involving 30-39% of body surface (BS)                   |
| 42 | SH83000 | Burn: 30-39% of body surface,<10%/unspec BS full thickness   |
| 43 | SH83100 | Burn: 30-39% of body surface, 10-19% BS full thickness       |
| 44 | SH83200 | Burn: 30-39% of body surface, 20-29% BS full thickness       |
| 45 | SH83300 | Burn: 30-39% of body surface, 30-39% BS full thickness       |
| 46 | SH83400 | Corrosions involving 30-39% of body surface                  |
| 47 |         |                                                              |
| 48 | SH83z00 | Burn: 30-39% of body surface NOS                             |
| 49 | SH84.00 | Burn involving 40-49% of body surface (BS)                   |
| 50 | SH84000 | Burn: 40-49% of body surface,<10%/unspec BS full thickness   |
| 51 | SH84100 | Burn: 40-49% of body surface, 10-19% BS full thickness       |
| 52 | SH84200 | Burn: 40-49% of body surface, 20-29% BS full thickness       |
| 53 | SH84300 | Burn: 40-49% of body surface, 30-39% BS full thickness       |
| 54 |         |                                                              |
| 55 | SH84400 | Burn: 40-49% of body surface, 40-49% BS full thickness       |
| 56 | SH84500 | Corrosions involving 40-49% of body surface                  |
| 57 |         |                                                              |
| 58 | SH84z00 | Burn: 40-49% of body surface NOS                             |
| 59 | SH85.00 | Burn involving 50-59% of body surface (BS)                   |
| 60 | SH85000 | Burn: 50-59% of body surface,<10%/unspec BS full thickness   |
|    | SH85100 | Burn: 50-59% of body surface, 10-19% BS full thickness       |

|    |         |                                                             |
|----|---------|-------------------------------------------------------------|
| 1  |         |                                                             |
| 2  | SH85200 | Burn: 50-59% of body surface, 20-29% BS full thickness      |
| 3  | SH85300 | Burn: 50-59% of body surface, 30-39% BS full thickness      |
| 4  | SH85400 | Burn: 50-59% of body surface, 40-49% BS full thickness      |
| 5  | SH85500 | Burn: 50-59% of body surface, 50-59% BS full thickness      |
| 6  | SH85600 | Corrosions involving 50-59% of body surface                 |
| 7  | SH85z00 | Burn: 50-59% of body surface NOS                            |
| 8  | SH86.00 | Burn involving 60-69% of body surface (BS)                  |
| 9  | SH86000 | Burn: 60-69% of body surface, <10%/unspec BS full thickness |
| 10 | SH86100 | Burn: 60-69% of body surface, 10-19% BS full thickness      |
| 11 | SH86200 | Burn: 60-69% of body surface, 20-29% BS full thickness      |
| 12 | SH86300 | Burn: 60-69% of body surface, 30-39% BS full thickness      |
| 13 | SH86400 | Burn: 60-69% of body surface, 40-49% BS full thickness      |
| 14 | SH86500 | Burn: 60-69% of body surface, 50-59% BS full thickness      |
| 15 | SH86600 | Burn: 60-69% of body surface, 60-69% BS full thickness      |
| 16 | SH86700 | Corrosions involving 60-69% of body surface                 |
| 17 | SH86z00 | Burn: 60-69% of body surface NOS                            |
| 18 | SH87.00 | Burn involving 70-79% of body surface (BS)                  |
| 19 | SH87000 | Burn: 70-79% of body surface, <10%/unspec BS full thickness |
| 20 | SH87100 | Burn: 70-79% of body surface, 10-19% BS full thickness      |
| 21 | SH87200 | Burn: 70-79% of body surface, 20-29% BS full thickness      |
| 22 | SH87300 | Burn: 70-79% of body surface, 30-39% BS full thickness      |
| 23 | SH87400 | Burn: 70-79% of body surface, 40-49% BS full thickness      |
| 24 | SH87500 | Burn: 70-79% of body surface, 50-59% BS full thickness      |
| 25 | SH87600 | Burn: 70-79% of body surface, 60-69% BS full thickness      |
| 26 | SH87700 | Burn: 70-79% of body surface, 70-79% BS full thickness      |
| 27 | SH87800 | Corrosions involving 70-79% of body surface                 |
| 28 | SH87z00 | Burn: 70-79% of body surface NOS                            |
| 29 | SH88.00 | Burn involving 80-89% of body surface (BS)                  |
| 30 | SH88000 | Burn: 80-89% of body surface, <10%/unspec BS full thickness |
| 31 | SH88100 | Burn: 80-89% of body surface, 10-19% =full thickness        |
| 32 | SH88200 | Burn: 80-89% of body surface, 20-29% BS full thickness      |
| 33 | SH88300 | Burn: 80-89% of body surface, 30-39% BS full thickness      |
| 34 | SH88400 | Burn: 80-89% of body surface, 40-49% BS full thickness      |
| 35 | SH88500 | Burn: 80-89% of body surface, 50-59% BS full thickness      |
| 36 | SH88600 | Burn: 80-89% of body surface, 60-69% BS full thickness      |
| 37 | SH88700 | Burn: 80-89% of body surface, 70-79% BS full thickness      |
| 38 | SH88800 | Burn: 80-89% of body surface, 80-89% BS full thickness      |
| 39 | SH88900 | Corrosions involving 80-89% of body surface                 |
| 40 | SH88z00 | Burn: 80-89% of body surface, NOS                           |
| 41 | SH89.00 | Burn involving >90% of body surface (BS)                    |
| 42 | SH89000 | Burn: >90% of body surface, <10%/unspec BS full thickness   |
| 43 | SH89100 | Burn: >90% of body surface, 10-19% BS full thickness        |
| 44 | SH89200 | Burn: >90% of body surface, 20-29% BS full thickness        |
| 45 | SH89300 | Burn: >90% of body surface, 30-39% BS full thickness        |
| 46 | SH89400 | Burn: >90% of body surface, 40-49% BS full thickness        |
| 47 | SH89500 | Burn: >90% of body surface, 50-59% BS full thickness        |
| 48 | SH89600 | Burn: >90% of body surface, 60-69% BS full thickness        |
| 49 | SH89700 | Burn: >90% of body surface, 70-79% BS full thickness        |
| 50 | SH89800 | Burn: >90% of body surface, 80-89% BS full thickness        |
| 51 | SH89900 | Burn: >90% of body surface, >90% BS full thickness          |
| 52 |         |                                                             |
| 53 |         |                                                             |
| 54 |         |                                                             |
| 55 |         |                                                             |
| 56 |         |                                                             |
| 57 |         |                                                             |
| 58 |         |                                                             |
| 59 |         |                                                             |
| 60 |         |                                                             |



|    |         |                                                              |
|----|---------|--------------------------------------------------------------|
| 1  |         |                                                              |
| 2  | SH89A00 | Corrosions involving 90% or more of body surface             |
| 3  | SH89z00 | Burn: >90% of body surface NOS                               |
| 4  | SH8z.00 | Burn as a percentage of body surface involved NOS            |
| 5  | SH9..00 | Burn - unspecified                                           |
| 6  | SH90.00 | Unspecified degree of burn NOS                               |
| 7  | SH91.00 | Superficial burn NOS                                         |
| 8  | SH91.11 | First degree burn                                            |
| 9  | SH92.00 | Partial thickness burn NOS                                   |
| 10 | SH92.11 | Second degree burn                                           |
| 11 | SH92000 | Superficial partial thickness burn NOS                       |
| 12 | SH92100 | Deep partial thickness burn NOS                              |
| 13 | SH93.00 | Full thickness burn NOS                                      |
| 14 | SH93.11 | Third degree burn                                            |
| 15 | SH94.00 | Deep full thickness burn, without loss of body part, NOS     |
| 16 | SH95.00 | Deep full thickness burn, with loss of body part, NOS        |
| 17 | SH9z.00 | Burn - unspecified                                           |
| 18 | SHz..00 | Burns NOS                                                    |
| 19 | SK03.00 | Post-traumatic wound infection NEC                           |
| 20 | SK1x200 | Multiple open wounds of neck                                 |
| 21 | SK1x500 | Multiple open wounds of abdomen, lower back and pelvis       |
| 22 | SK1x700 | Multiple open wounds of forearm                              |
| 23 | SK1x800 | Multiple open wounds of lower leg                            |
| 24 | SK1x900 | Open wounds involv thorax with abdomen,lwr back and pelvis   |
| 25 | SK1xA00 | Open wounds invol multi regions of up limb(s) wth lw limb(s) |
| 26 | SP23.00 | Operation wound disruption                                   |
| 27 | SP23000 | Operation wound dehiscence                                   |
| 28 | SP23011 | Postoperative wound breakdown                                |
| 29 | SP23100 | Operation wound rupture                                      |
| 30 | SP23200 | Surgical wound necrosis                                      |
| 31 | SP23300 | Burst abdomen NEC                                            |
| 32 | SP23400 | Breakdown of totally implantable venous access device port   |
| 33 | SP23z00 | Operation wound disruption NOS                               |
| 34 | SP23z11 | Delayed healing surgical wound                               |
| 35 | SP23z12 | Healing delayed surgical wound                               |
| 36 | SP23z13 | Wound surgical healing delayed                               |
| 37 | SP24300 | Foreign body left in wound                                   |
| 38 | SP25000 | Postoperative stitch abscess                                 |
| 39 | SP25100 | Postoperative wound abscess                                  |
| 40 | SP25500 | Postoperative wound infection, unspecified                   |
| 41 | SP25600 | Postoperative wound infection-deep                           |
| 42 | SP25700 | Postoperative wound infection-superficial                    |
| 43 | SP25800 | MRSA infection of postoperative wound                        |
| 44 | SP28.00 | Postoperative wound sinus                                    |
| 45 | SQ...00 | Open wounds involving multiple body regions                  |
| 46 | Syu0200 | [X]Open wound of other parts of head                         |
| 47 | Syu0A00 | [X]Penetrating wound of orbit with or without foreign body   |
| 48 | Syu1300 | [X]Open wound of other parts of the neck                     |
| 49 | Syu1400 | [X]Open wound of neck, part unspecified                      |
| 50 | Syu2500 | [X]Open wound of other parts of thorax                       |
| 51 | Syu2600 | [X]Open wound of thorax, part unspecified                    |
| 52 |         |                                                              |
| 53 |         |                                                              |
| 54 |         |                                                              |
| 55 |         |                                                              |
| 56 |         |                                                              |
| 57 |         |                                                              |
| 58 |         |                                                              |
| 59 |         |                                                              |
| 60 |         |                                                              |

|    |         |                                                              |
|----|---------|--------------------------------------------------------------|
| 1  |         |                                                              |
| 2  | Syu3200 | [X]Open wound of oth and unspecif external genital organs    |
| 3  | Syu3300 | [X]Open wound oth & unspecif part abdomen/lower back/pelvis  |
| 4  | Syu4100 | [X]Open wound of oth & unspecif parts of should & upper arm  |
| 5  | Syu5200 | [X]Open wound of other parts of forearm                      |
| 6  | Syu6200 | [X]Open wound of other parts of wrist and hand               |
| 7  | Syu7100 | [X]Open wound of other parts of hip and thigh                |
| 8  | Syu8200 | [X]Open wound of other parts of lower leg                    |
| 9  | Syu9200 | [X]Open wound of other parts of foot                         |
| 10 | Syu9300 | [X]Open wound of other parts of ankle and foot               |
| 11 | SyuA100 | [X]Open wounds involving other combinations of body regions  |
| 12 | SyuBA00 | [X]Open wound of unspecified body region                     |
| 13 | SyuD.00 | [X]Burns and corrosions                                      |
| 14 | SyuD000 | [X]Burns of other parts of eye and adnexa                    |
| 15 | SyuD800 | [X]Burns of mult reg, at least 1 burn of 3rd deg mentioned   |
| 16 | SyuD900 | [X]Corrosn multi reg, at least 1 corr of 3rd deg mentioned   |
| 17 | SyuJ000 | [X]Post-traumatic wound infection, not elsewhere classified  |
| 18 | TG80000 | Accidental burning/scalding caused by boiling water, unspec  |
| 19 | TG80100 | Accidental burning/scalding caused by boiling liquid, unspec |
| 20 | TG80200 | Accidental burning or scalding caused by liquid metal        |
| 21 | TG80300 | Accidental burning or scalding caused by steam               |
| 22 | TG80400 | Accidental burning/scalding by boiling water from kettle     |
| 23 | TG80500 | Accidental burning/scalding by boiling water from saucepan   |
| 24 | TG80600 | Accidental burning or scalding caused by tea                 |
| 25 | TG80700 | Accidental burning or scalding caused by coffee              |
| 26 | TG80800 | Accidental burning or scalding caused by chocolate           |
| 27 | TG80900 | Accidental burning or scalding caused by milk                |
| 28 | TG80A00 | Accidental burning/scalding caused by soup, stew or curries  |
| 29 | TG80B00 | Accidental burning or scalding caused by fat                 |
| 30 | TG80C00 | Accidental burning or scalding caused by steam from kettle   |
| 31 | TG80D00 | Accidental burning or scalding by steam from car radiator    |
| 32 | TG80y00 | Accidental burning or scalding caused by other hot vapour    |
| 33 | TG80z00 | Accidental burning/scalding caused by hot liquid/vapour NOS  |
| 34 | TGyz700 | Accidental wound NOS                                         |
| 35 | Z174M00 | Pressure area care                                           |
| 36 | Z174M11 | PAC - Pressure area care                                     |
| 37 | Z174N00 | Wound care                                                   |
| 38 | Z174N11 | WOUND TREATMENT                                              |
| 39 | Z174N12 | WOUND THERAPY                                                |
| 40 | Z174O00 | Post-surgical wound care                                     |
| 41 | Z174O11 | Post-operative wound care                                    |
| 42 | Z174P00 | Pressure sore care                                           |
| 43 | Z174Q00 | Skin ulcer care                                              |
| 44 | Z1B..00 | Dressing of skin or wound                                    |
| 45 | Z1B..11 | Application of dressing                                      |
| 46 | Z1B..12 | Dressing                                                     |
| 47 | Z1B1.00 | Attention to dressing of skin                                |
| 48 | Z1B1100 | Checking dressing of skin                                    |
| 49 | Z1B1200 | Checking dressing for leakage                                |
| 50 | Z1B1300 | Change of dressing                                           |
| 51 | Z1B1311 | Repeating dressing                                           |
| 52 |         |                                                              |
| 53 |         |                                                              |
| 54 |         |                                                              |
| 55 |         |                                                              |
| 56 |         |                                                              |
| 57 |         |                                                              |
| 58 |         |                                                              |
| 59 |         |                                                              |
| 60 |         |                                                              |



|    |         |                                         |
|----|---------|-----------------------------------------|
| 1  |         |                                         |
| 2  | Z1B1312 | Reapplying a fresh dressing             |
| 3  | Z1B1313 | Redressing wound                        |
| 4  | Z1B1400 | Attention to dressing of burnt skin     |
| 5  | Z1B2.00 | Dressing of skin                        |
| 6  | Z1B2100 | Dressing of burnt skin                  |
| 7  | Z1B2111 | Burn dressing                           |
| 8  | Z1B2200 | Covering burnt skin with plastic bag    |
| 9  | Z1B2300 | Dressing of skin ulcer                  |
| 10 | Z1B3.00 | Dressing of pressure sore               |
| 11 | Z1O6100 | Exposing wound to air                   |
| 12 | Z1R2.00 | Cleaning wound                          |
| 13 | Z1R2.11 | Cleansing wound                         |
| 14 | Z1R2.12 | Wound toilet                            |
| 15 | Z1R3.00 | Debridement of skin                     |
| 16 | Z1R3.11 | Debridement of wound of skin            |
| 17 | Z1R3.12 | Wound debridement                       |
| 18 | Z1R3.13 | Wound debridement                       |
| 19 | Z1R3100 | Debridement of wound with topical agent |
| 20 | Z1R3200 | Surgical debridement of wound           |
| 21 | Z1R4.00 | Removal of slough from skin             |
| 22 | Z1R4.11 | Desloughing wound                       |
| 23 | Z1R5.00 | Removal of contaminant from skin        |
| 24 | ZA13E00 | Insertion of quill in the nail bed      |
| 25 | ZA14.00 | Ablation of nail bed                    |
| 26 | ZA14.11 | Ablation of nail matrix                 |
| 27 | ZA14100 | Total ablation of nail matrix           |
| 28 | ZA14200 | Partial ablation of nail matrix         |
| 29 | ZQ37.00 | Wound assessment                        |
| 30 | ZQ38.00 | Assessment of fluid loss from wound     |
| 31 | ZQ38.11 | Assessing seepage from wound            |
| 32 | ZQ39.00 | Pressure sore assessment                |
| 33 | ZQ39.11 | Decubitus ulcer assessment              |
| 34 | ZQ39.12 | Pressure ulcer assessment               |
| 35 | ZQ39.13 | Bed sore assessment                     |
| 36 | ZQ3A.00 | Assessment of burn injuries             |
| 37 | ZQ3A.11 | Assessment of levels of burns           |
| 38 | ZR1V.00 | ASEPSIS score for wound infection       |
| 39 | Zw02D00 | [Q] Open fracture grade 1               |
| 40 | Zw02E00 | [Q] Open fracture grade 2               |
| 41 | Zw02F00 | [Q] Open fracture grade 3               |
| 42 | Zw02G00 | [Q] Open fracture grade 3A              |
| 43 | Zw02H00 | [Q] Open fracture grade 3B              |
| 44 | Zw02J00 | [Q] Open fracture grade 3C              |
| 45 | ZX14.00 | Damaging own wounds                     |
| 46 | ZX14300 | Poking fingers into wound               |
| 47 | ZX14400 | Inserting objects into wound            |
| 48 |         |                                         |
| 49 |         |                                         |
| 50 |         |                                         |
| 51 |         |                                         |
| 52 |         |                                         |
| 53 |         |                                         |
| 54 |         |                                         |
| 55 |         |                                         |
| 56 |         |                                         |
| 57 |         |                                         |
| 58 |         |                                         |
| 59 |         |                                         |
| 60 |         |                                         |

**The RECORD statement – checklist of items, extended from the STROBE statement, that should be reported in observational studies using routinely collected health data.**

|                           | Item No. | STROBE items                                                                                                                                                                               | Location in manuscript where items are reported | RECORD items                                                                                                                                                                                                                                                                                                                                                                                                                                | Location in manuscript where items are reported |
|---------------------------|----------|--------------------------------------------------------------------------------------------------------------------------------------------------------------------------------------------|-------------------------------------------------|---------------------------------------------------------------------------------------------------------------------------------------------------------------------------------------------------------------------------------------------------------------------------------------------------------------------------------------------------------------------------------------------------------------------------------------------|-------------------------------------------------|
| <b>Title and abstract</b> |          |                                                                                                                                                                                            |                                                 |                                                                                                                                                                                                                                                                                                                                                                                                                                             |                                                 |
|                           | 1        | (a) Indicate the study's design with a commonly used term in the title or the abstract (b) Provide in the abstract an informative and balanced summary of what was done and what was found | Page 1                                          | RECORD 1.1: The type of data used should be specified in the title or abstract. When possible, the name of the databases used should be included.<br><br>RECORD 1.2: If applicable, the geographic region and timeframe within which the study took place should be reported in the title or abstract.<br><br>RECORD 1.3: If linkage between databases was conducted for the study, this should be clearly stated in the title or abstract. | Page 1<br><br>Page 1<br><br>N/A                 |
| <b>Introduction</b>       |          |                                                                                                                                                                                            |                                                 |                                                                                                                                                                                                                                                                                                                                                                                                                                             |                                                 |
| Background rationale      | 2        | Explain the scientific background and rationale for the investigation being reported                                                                                                       | Page 6                                          |                                                                                                                                                                                                                                                                                                                                                                                                                                             |                                                 |
| Objectives                | 3        | State specific objectives, including any prespecified hypotheses                                                                                                                           | Page 6                                          |                                                                                                                                                                                                                                                                                                                                                                                                                                             |                                                 |
| <b>Methods</b>            |          |                                                                                                                                                                                            |                                                 |                                                                                                                                                                                                                                                                                                                                                                                                                                             |                                                 |
| Study Design              | 4        | Present key elements of study design early in the paper                                                                                                                                    | Page 7                                          |                                                                                                                                                                                                                                                                                                                                                                                                                                             |                                                 |
| Setting                   | 5        | Describe the setting, locations, and relevant dates, including periods of recruitment, exposure, follow-up, and data collection                                                            | Pages 8 and 10                                  |                                                                                                                                                                                                                                                                                                                                                                                                                                             |                                                 |

|                              |   |                                                                                                                                                                                                                                                                                                                                                                                                                                                                                                                                                                                                                                                                                                                              |            |                                                                                                                                                                                                                                                                                                                                                                                                                                                                                                                                                                                                                                                                                                      |                                                                                                                                                                                                                                         |
|------------------------------|---|------------------------------------------------------------------------------------------------------------------------------------------------------------------------------------------------------------------------------------------------------------------------------------------------------------------------------------------------------------------------------------------------------------------------------------------------------------------------------------------------------------------------------------------------------------------------------------------------------------------------------------------------------------------------------------------------------------------------------|------------|------------------------------------------------------------------------------------------------------------------------------------------------------------------------------------------------------------------------------------------------------------------------------------------------------------------------------------------------------------------------------------------------------------------------------------------------------------------------------------------------------------------------------------------------------------------------------------------------------------------------------------------------------------------------------------------------------|-----------------------------------------------------------------------------------------------------------------------------------------------------------------------------------------------------------------------------------------|
| Participants                 | 6 | <p>(a) <i>Cohort study</i> - Give the eligibility criteria, and the sources and methods of selection of participants. Describe methods of follow-up</p> <p><i>Case-control study</i> - Give the eligibility criteria, and the sources and methods of case ascertainment and control selection. Give the rationale for the choice of cases and controls</p> <p><i>Cross-sectional study</i> - Give the eligibility criteria, and the sources and methods of selection of participants</p> <p>(b) <i>Cohort study</i> - For matched studies, give matching criteria and number of exposed and unexposed</p> <p><i>Case-control study</i> - For matched studies, give matching criteria and the number of controls per case</p> | Page 8     | <p>RECORD 6.1: The methods of study population selection (such as codes or algorithms used to identify subjects) should be listed in detail. If this is not possible, an explanation should be provided.</p> <p>RECORD 6.2: Any validation studies of the codes or algorithms used to select the population should be referenced. If validation was conducted for this study and not published elsewhere, detailed methods and results should be provided.</p> <p>RECORD 6.3: If the study involved linkage of databases, consider use of a flow diagram or other graphical display to demonstrate the data linkage process, including the number of individuals with linked data at each stage.</p> | <p>2,095 Read codes were used (Supplementary Table S1).</p> <p>Read codes have been used to code symptoms in the NHS since 1985. IQVIA used these codes to identify the patient population independently of the Authors.</p> <p>N/A</p> |
| Variables                    | 7 | Clearly define all outcomes, exposures, predictors, potential confounders, and effect modifiers. Give diagnostic criteria, if applicable.                                                                                                                                                                                                                                                                                                                                                                                                                                                                                                                                                                                    | Pages 8-10 | RECORD 7.1: A complete list of codes and algorithms used to classify exposures, outcomes, confounders, and effect modifiers should be provided. If these cannot be reported, an explanation should be provided.                                                                                                                                                                                                                                                                                                                                                                                                                                                                                      | N/A                                                                                                                                                                                                                                     |
| Data sources/<br>measurement | 8 | For each variable of interest, give sources of data and details of methods of assessment (measurement). Describe comparability of assessment methods if there is more than one group                                                                                                                                                                                                                                                                                                                                                                                                                                                                                                                                         | Pages 8-10 |                                                                                                                                                                                                                                                                                                                                                                                                                                                                                                                                                                                                                                                                                                      |                                                                                                                                                                                                                                         |

|                                                                                                                                                                                                 |                                  |    |                                                                                                                                                                                                                                                                                                                                                                                                                                                                                                                                                                      |                                                                                                 |                                                                                                                                                       |                                                   |
|-------------------------------------------------------------------------------------------------------------------------------------------------------------------------------------------------|----------------------------------|----|----------------------------------------------------------------------------------------------------------------------------------------------------------------------------------------------------------------------------------------------------------------------------------------------------------------------------------------------------------------------------------------------------------------------------------------------------------------------------------------------------------------------------------------------------------------------|-------------------------------------------------------------------------------------------------|-------------------------------------------------------------------------------------------------------------------------------------------------------|---------------------------------------------------|
| 1<br>2<br>3<br>4<br>5<br>6<br>7<br>8<br>9<br>10<br>11<br>12<br>13<br>14<br>15<br>16<br>17<br>18<br>19<br>20<br>21<br>22<br>23<br>24<br>25<br>26<br>27<br>28<br>29<br>30<br>31<br>32<br>33<br>34 | Bias                             | 9  | Describe any efforts to address potential sources of bias                                                                                                                                                                                                                                                                                                                                                                                                                                                                                                            | Pages 8,9                                                                                       |                                                                                                                                                       |                                                   |
|                                                                                                                                                                                                 | Study size                       | 10 | Explain how the study size was arrived at                                                                                                                                                                                                                                                                                                                                                                                                                                                                                                                            | Pages 8,9                                                                                       |                                                                                                                                                       |                                                   |
|                                                                                                                                                                                                 | Quantitative variables           | 11 | Explain how quantitative variables were handled in the analyses. If applicable, describe which groupings were chosen, and why                                                                                                                                                                                                                                                                                                                                                                                                                                        | Pages 8-10                                                                                      |                                                                                                                                                       |                                                   |
|                                                                                                                                                                                                 | Statistical methods              | 12 | (a) Describe all statistical methods, including those used to control for confounding<br>(b) Describe any methods used to examine subgroups and interactions<br>(c) Explain how missing data were addressed<br>(d) <i>Cohort study</i> - If applicable, explain how loss to follow-up was addressed<br><i>Case-control study</i> - If applicable, explain how matching of cases and controls was addressed<br><i>Cross-sectional study</i> - If applicable, describe analytical methods taking account of sampling strategy<br>(e) Describe any sensitivity analyses | Pages 9-10<br><br>Pages 9-10<br><br>Page 9<br><br>N/A<br><br><br><br><br><br><br><br><br>Page10 |                                                                                                                                                       |                                                   |
| 35<br>36<br>37<br>38<br>39<br>40<br>41<br>42<br>43<br>44<br>45<br>46<br>47                                                                                                                      | Data access and cleaning methods |    | ..                                                                                                                                                                                                                                                                                                                                                                                                                                                                                                                                                                   |                                                                                                 | RECORD 12.1: Authors should describe the extent to which the investigators had access to the database population used to create the study population. | Authors did not have access to the THIN database. |

|                  |    |                                                                                                                                                                                                                                                                                                                                                 |                                           |                                                                                                                                                                                                                                                                                                                    |             |
|------------------|----|-------------------------------------------------------------------------------------------------------------------------------------------------------------------------------------------------------------------------------------------------------------------------------------------------------------------------------------------------|-------------------------------------------|--------------------------------------------------------------------------------------------------------------------------------------------------------------------------------------------------------------------------------------------------------------------------------------------------------------------|-------------|
|                  |    |                                                                                                                                                                                                                                                                                                                                                 |                                           | RECORD 12.2: Authors should provide information on the data cleaning methods used in the study.                                                                                                                                                                                                                    |             |
| Linkage          |    | ..                                                                                                                                                                                                                                                                                                                                              |                                           | RECORD 12.3: State whether the study included person-level, institutional-level, or other data linkage across two or more databases. The methods of linkage and methods of linkage quality evaluation should be provided.                                                                                          | Pages 8-10  |
| <b>Results</b>   |    |                                                                                                                                                                                                                                                                                                                                                 |                                           |                                                                                                                                                                                                                                                                                                                    |             |
| Participants     | 13 | (a) Report the numbers of individuals at each stage of the study ( <i>e.g.</i> , numbers potentially eligible, examined for eligibility, confirmed eligible, included in the study, completing follow-up, and analysed)<br>(b) Give reasons for non-participation at each stage.<br>(c) Consider use of a flow diagram                          | Page 11, 26                               | RECORD 13.1: Describe in detail the selection of the persons included in the study ( <i>i.e.</i> , study population selection) including filtering based on data quality, data availability and linkage. The selection of included persons can be described in the text and/or by means of the study flow diagram. | Pages 8-10. |
| Descriptive data | 14 | (a) Give characteristics of study participants ( <i>e.g.</i> , demographic, clinical, social) and information on exposures and potential confounders<br>(b) Indicate the number of participants with missing data for each variable of interest<br>(c) <i>Cohort study</i> - summarise follow-up time ( <i>e.g.</i> , average and total amount) | Pages 11-15<br><br>N/A<br><br>Pages 11-15 |                                                                                                                                                                                                                                                                                                                    |             |
| Outcome data     | 15 | <i>Cohort study</i> - Report numbers of outcome events or summary measures over time<br><i>Case-control study</i> - Report numbers in each exposure                                                                                                                                                                                             | Pages 11-15, 26-34                        |                                                                                                                                                                                                                                                                                                                    |             |

|                   |    |                                                                                                                                                                                                                                                                                                                                                                                                                 |                                          |                                                                                                                                                                                                                                                                                                          |     |
|-------------------|----|-----------------------------------------------------------------------------------------------------------------------------------------------------------------------------------------------------------------------------------------------------------------------------------------------------------------------------------------------------------------------------------------------------------------|------------------------------------------|----------------------------------------------------------------------------------------------------------------------------------------------------------------------------------------------------------------------------------------------------------------------------------------------------------|-----|
|                   |    | category, or summary measures of exposure<br><i>Cross-sectional study</i> - Report numbers of outcome events or summary measures                                                                                                                                                                                                                                                                                |                                          |                                                                                                                                                                                                                                                                                                          |     |
| Main results      | 16 | (a) Give unadjusted estimates and, if applicable, confounder-adjusted estimates and their precision (e.g., 95% confidence interval). Make clear which confounders were adjusted for and why they were included<br>(b) Report category boundaries when continuous variables were categorized<br>(c) If relevant, consider translating estimates of relative risk into absolute risk for a meaningful time period | Pages 11-15, 26-34<br><br>N/A<br><br>N/A |                                                                                                                                                                                                                                                                                                          |     |
| Other analyses    | 17 | Report other analyses done— e.g., analyses of subgroups and interactions, and sensitivity analyses                                                                                                                                                                                                                                                                                                              | Page 15                                  |                                                                                                                                                                                                                                                                                                          |     |
| <b>Discussion</b> |    |                                                                                                                                                                                                                                                                                                                                                                                                                 |                                          |                                                                                                                                                                                                                                                                                                          |     |
| Key results       | 18 | Summarise key results with reference to study objectives                                                                                                                                                                                                                                                                                                                                                        | Pages 16-21                              |                                                                                                                                                                                                                                                                                                          |     |
| Limitations       | 19 | Discuss limitations of the study, taking into account sources of potential bias or imprecision. Discuss both direction and magnitude of any potential bias                                                                                                                                                                                                                                                      | Pages 19-21                              | RECORD 19.1: Discuss the implications of using data that were not created or collected to answer the specific research question(s). Include discussion of misclassification bias, unmeasured confounding, missing data, and changing eligibility over time, as they pertain to the study being reported. | N/A |
| Interpretation    | 20 | Give a cautious overall interpretation of results considering objectives,                                                                                                                                                                                                                                                                                                                                       | Pages 16-21                              |                                                                                                                                                                                                                                                                                                          |     |

|                                                           |    |                                                                                                                                                               |             |                                                                                                                                                          |     |
|-----------------------------------------------------------|----|---------------------------------------------------------------------------------------------------------------------------------------------------------------|-------------|----------------------------------------------------------------------------------------------------------------------------------------------------------|-----|
|                                                           |    | limitations, multiplicity of analyses, results from similar studies, and other relevant evidence                                                              |             |                                                                                                                                                          |     |
| Generalisability                                          | 21 | Discuss the generalisability (external validity) of the study results                                                                                         | Pages 20-21 |                                                                                                                                                          |     |
| <b>Other Information</b>                                  |    |                                                                                                                                                               |             |                                                                                                                                                          |     |
| Funding                                                   | 22 | Give the source of funding and the role of the funders for the present study and, if applicable, for the original study on which the present article is based | Page 3      |                                                                                                                                                          |     |
| Accessibility of protocol, raw data, and programming code |    |                                                                                                                                                               |             | RECORD 22.1: Authors should provide information on how to access any supplemental information such as the study protocol, raw data, or programming code. | N/A |

\*Reference: Benchimol EI, Smeeth L, Guttman A, Harron K, Moher D, Petersen I, Sørensen HT, von Elm E, Langan SM, the RECORD Working Committee. The REporting of studies Conducted using Observational Routinely-collected health Data (RECORD) Statement. *PLoS Medicine* 2015; in press.

\*Checklist is protected under Creative Commons Attribution ([CC BY](https://creativecommons.org/licenses/by/4.0/)) license.



# BMJ Open

## COHORT STUDY EVALUATING THE BURDEN OF WOUNDS TO THE UK'S NATIONAL HEALTH SERVICE IN 2017/18: UPDATE FROM 2012/13

|                                 |                                                                                                                                                                                             |
|---------------------------------|---------------------------------------------------------------------------------------------------------------------------------------------------------------------------------------------|
| Journal:                        | <i>BMJ Open</i>                                                                                                                                                                             |
| Manuscript ID                   | bmjopen-2020-045253.R1                                                                                                                                                                      |
| Article Type:                   | Original research                                                                                                                                                                           |
| Date Submitted by the Author:   | 29-Oct-2020                                                                                                                                                                                 |
| Complete List of Authors:       | Guest, Julian F.; Catalyst Health Economics Consultants Ltd<br>Fuller, Graham; Catalyst Health Economics Consultants Ltd<br>Vowden, Peter; Bradford Teaching Hospitals NHS Foundation Trust |
| <b>Primary Subject Heading</b>: | Health economics                                                                                                                                                                            |
| Secondary Subject Heading:      | Evidence based practice, Health economics                                                                                                                                                   |
| Keywords:                       | HEALTH ECONOMICS, HEALTH SERVICES ADMINISTRATION & MANAGEMENT, WOUND MANAGEMENT                                                                                                             |
|                                 |                                                                                                                                                                                             |

SCHOLARONE™  
Manuscripts

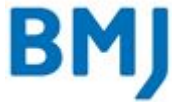

I, the Submitting Author has the right to grant and does grant on behalf of all authors of the Work (as defined in the below author licence), an exclusive licence and/or a non-exclusive licence for contributions from authors who are: i) UK Crown employees; ii) where BMJ has agreed a CC-BY licence shall apply, and/or iii) in accordance with the terms applicable for US Federal Government officers or employees acting as part of their official duties; on a worldwide, perpetual, irrevocable, royalty-free basis to BMJ Publishing Group Ltd ("BMJ") its licensees and where the relevant Journal is co-owned by BMJ to the co-owners of the Journal, to publish the Work in this journal and any other BMJ products and to exploit all rights, as set out in our [licence](#).

The Submitting Author accepts and understands that any supply made under these terms is made by BMJ to the Submitting Author unless you are acting as an employee on behalf of your employer or a postgraduate student of an affiliated institution which is paying any applicable article publishing charge ("APC") for Open Access articles. Where the Submitting Author wishes to make the Work available on an Open Access basis (and intends to pay the relevant APC), the terms of reuse of such Open Access shall be governed by a Creative Commons licence – details of these licences and which [Creative Commons](#) licence will apply to this Work are set out in our licence referred to above.

Other than as permitted in any relevant BMJ Author's Self Archiving Policies, I confirm this Work has not been accepted for publication elsewhere, is not being considered for publication elsewhere and does not duplicate material already published. I confirm all authors consent to publication of this Work and authorise the granting of this licence.

## ORIGINAL ARTICLE

COHORT STUDY EVALUATING THE BURDEN OF WOUNDS TO THE UK'S  
NATIONAL HEALTH SERVICE IN 2017/18: UPDATE FROM 2012/13Julian F Guest<sup>1</sup>, Graham W Fuller<sup>1</sup>, Peter Vowden<sup>2</sup><sup>1</sup>Catalyst Consultants, Poole, UK; <sup>2</sup>Bradford Teaching Hospitals NHS  
Foundation Trust, Bradford, UK.**Correspondence to:**

Professor Julian F Guest

Catalyst Consultants

PO Box 9429

Poole BH4 0HA

UK

Tel: +44 1923 450045

E-mail: julian.guest@catalyst-health.com

**Running title:** Health economic impact of wounds in the UK**Word count:** 6,135 excluding Abstract and References**Number of tables and figures:** 10 tables and 0 figures

## ABSTRACT

**Objective:** To evaluate the prevalence of wounds managed by the UK's National Health Service (NHS) in 2017/18 and associated health outcomes, resource use and costs.

**Design:** Retrospective cohort analysis of the electronic records of patients from The Health Improvement Network (THIN) database.

**Setting:** Primary and secondary care sectors in the UK.

**Participants:** Randomly selected cohort of 3,000 patients from the THIN database who had a wound in 2017/18.

**Primary and secondary outcome measures:** Patients' characteristics, wound-related health outcomes, healthcare resource use and total National Health Service (NHS) cost of patient management.

**Results:** There were an estimated 3.8 million patients with a wound managed by the NHS in 2017/18, of which 70% healed in the study year; 89% and 49% of acute and chronic wounds healed, respectively. An estimated 59% of chronic wounds healed if there was no evidence of infection compared to 45% if there was a definite or suspected infection. Healing rate of acute wounds was unaffected by the presence of infection. Smoking status appeared to only affect the healing rate of chronic wounds. Annual levels of resource use attributable to wound management included 54.4 million district/community nurse visits, 53.6 million healthcare assistant visits and 28.1 million practice nurse visits. The annual NHS cost of wound management was £8.3 billion, of which £2.7 billion and £5.6 billion was associated with managing healed and unhealed wounds, respectively. Eighty one per cent of the total annual NHS cost was incurred in the community.

**Conclusion:** The annual prevalence of wounds increased by 71% between 2012/13 and 2017/18. There was a substantial increase in resource use over this period and patient management cost increased by 48% in real terms. There needs to be a structural change within the NHS in order to manage the increasing demand for wound care and improve patient outcomes.

**Keywords:** Burden; cost; ulcers; wounds; UK.

## STRENGTHS AND LIMITATIONS OF THIS STUDY

- This is the first study to estimate how the health economic burden of wounds to the UK's NHS has changed over the last five years.
- This study was undertaken using real world evidence derived from the anonymised records of a randomised sample of 3,000 patients in The Health Improvement Network (THIN) database (a nationally representative database of clinical practice among >11 million patients registered with general practitioners in the UK).
- The estimates were derived following a systematic analysis of patients' characteristics, wound-related health outcomes and community-based and secondary care resource use pertaining to wound care contained in the patients' electronic records.
- The annual number of 3.8 million wounds in 2017/18 may be an underestimate since some of the patients in our data set may have had multiple wounds, but this is not transparent in the patients' records and it is very difficult to retrospectively extricate resource use for different wounds from the records of a patient with multiple wounds of the same aetiology.
- The analysis does not consider the potential impact of those wounds that remained unhealed beyond the study period, nor the potential impact of managing patients with wounds being cared for in nursing homes.

## ETHICS APPROVAL

Ethics approval to use anonymised patients' records from the THIN database for this study was obtained from the Research Ethics Committee that appraises studies using the THIN database (Reference number 18THIN093).

For peer review only

## INTRODUCTION

Our 2012/13 burden of wounds study estimated that the UK's National Health Service (NHS) managed 2.2 million patients with a wound at a cost of £5.3 billion [1-3]. An estimated 61% of all wounds in that burden of wounds study healed in the study year (79% of acute wounds and 43% of chronic wounds). Patients were predominantly managed in the community with 18.6 million practice nurse visits, 10.9 million community nurse visits, 7.7 million general practitioner (GP) visits, 3.4 million hospital outpatient visits. Five years ago, patients also received 97.1 million drug prescriptions and 262.2 million dressings. Additionally, only 16% of all cases with an ulcer of the lower limb had a Doppler ankle brachial pressure index recorded in their records [1].

This study led to such concern among politicians that the UK Parliament (House of Lords) debated developing a national strategy for improving the standards of wound care in the NHS [4]. As a consequence, NHS England and NHS Improvement established the National Wound Care Strategy Programme in the last quarter of 2018 [5]. The aim of the Programme is to scope the development of a national strategy for wound care in England that focuses on improving care relating to pressure ulcers, lower limb ulcers and surgical wounds [5].

Between 2012 and 2017 there was an estimated 4% decline in the number of practice nurses and a 30% decline in the number of district nurses employed in front-line patient care [6-9]. During this period we reported on unwarranted variation in wound care arising in part from inconsistencies in staff involvement and dressing choice and in many instances a lack of a coherent treatment plan [10-16]. Hence, it is reasonable to assume that not all patients with equal need have always had access to, or received, the same continuous levels of healthcare. However, patients should be afforded the best care available (within the context of limited resources) in order to obtain maximum health gains [17].

The aim of this new study was to assess the extent of change in the burden of wounds over five years (i.e. between 2012/13 and 2017/18) in terms of annual prevalence, health outcomes, healthcare resource use and NHS costs.



## METHODS

### Study Design

This was a retrospective cohort analysis of the anonymised case records of patients with a wound randomly extracted from The Health Improvement Network (THIN) database. The perspective of the analysis was the UK's NHS.

### The THIN Database

The THIN database contains electronic records on >11 million anonymised patients entered by GPs from >560 practices across the UK. The patient composition within the THIN database has been shown to be representative of the UK population in terms of demographics and disease distribution [18] and the database theoretically contains patients' entire medical history. In particular, the database collects data on the dates that patients registered or left their practice as well as demographic data such as date of birth and gender. Patients who reside at the same address or are members of the same family can be linked using a household identifier, provided they are registered with the same general practice.

All medical conditions and symptoms recorded electronically during a patient's consultation in the general practice are recorded in the THIN database, thereby building up long computerised medical histories using Read Codes [19]. GP prescribing is computerised and entered directly into the database. Prescriptions not issued electronically (e.g. during home visits) are also entered, however, there is a possibility of under-recording of such items. Information is also recorded on referrals to secondary care, including the specialty. Secondary care information and other medically related information received by the practice are entered into the database. This includes details on hospital admissions, discharge medication, diagnosis, outpatient consultations, investigations and treatment outcomes. Details from other healthcare interventions, such as information on lifestyle and preventative healthcare, as well as a range of variables such as height, weight, body mass index, blood pressure, smoking and alcohol status, immunisation and laboratory test results are also recorded. Hence, the information contained in the THIN database reflects actual clinical practice.

1  
2  
3 (THIN is a registered trademark of Cegedim SA in the United Kingdom and other countries.  
4 Reference made to the THIN database is intended to be descriptive of the data asset licensed  
5 by IQVIA, who interrogated the database and performed the randomisation independently of  
6 the Authors. The Authors had no direct access to the THIN database.)  
7  
8  
9

## 10 11 12 **Study Population** 13

14  
15 The study population comprised the anonymised case records of a randomly selected cohort of  
16 3,000 patients from the THIN database (provided to the Authors by IQVIA) who had a wound  
17 between 1 March 2017 and 28 February 2018.  
18  
19

20  
21 Patients were included in the data set if they:  
22

- 23 • Were 18 years of age or over.
- 24 • Had one of 2,095 wound-related Read codes (Table S1).
- 25 • Had continuous medical history in their case record from the first mention of a wound in  
26 the study year up to the time the data were extracted from the database, unless they died,  
27 in order to exclude patients who had moved or changed their general practice.  
28  
29  
30  
31  
32  
33

34 Patients were excluded from the data set if they had a surgical wound that healed within four  
35 weeks of the surgical procedure (since any resource use incurred would be due to the surgical  
36 procedure and not the wound) or if they had a dermatological tumour. These  
37 inclusion/exclusion criteria are identical to those used in our earlier 2012/13 study [1].  
38  
39  
40  
41  
42

43 Every patient in the THIN database who fulfilled the study's inclusion and exclusion criteria  
44 was assigned a random number by IQVIA. A representative sample was then generated by  
45 random selection of the random numbers of the whole cohort using a uniform distribution. As  
46 such, IQVIA advised that the random sample was representative of the whole population from  
47 which it was derived. The complete electronic records of the 3,000 patients in the sample were  
48 then supplied to the Authors, which enabled analysis of data both within and outside of the  
49 study period.  
50  
51  
52  
53  
54  
55  
56  
57  
58  
59  
60

## Patient and Public Involvement

Patients and members of the public were not directly involved in this study. The study population was limited to the anonymised records of patients in the THIN database.

## Study Variables and Statistical Analyses

Wound type was documented in the patients' records and the authors categorised them as being either acute (i.e. abscess, burn, open wound, unhealed surgical wound, trauma) or chronic (i.e. diabetic foot ulcer, arterial leg ulcer, mixed leg ulcer, venous leg ulcer, pressure ulcer). The following information was systematically extracted from the patients' electronic records over the 12 months from 1 March 2017 to 28 February 2018 according to the protocol approved by the ethics committee.

- Patients' characteristics.
- Patients' comorbidities (defined as a non-acute condition that patients were suffering from in the year before the start of their wound and not necessarily the year before the start of the study period).
- Wound-related healthcare resource use (i.e. dressings, bandages, topical treatments, negative pressure wound therapy, district nurse and healthcare assistants visits (both of whom provide care within a patient's home), practice nurse visits (who provide care within a GP's surgery), GP visits, hospital outpatient visits, laboratory tests), prescribed medication (i.e. analgesics, non-steroidal anti-inflammatory drugs (NSAIDs) and systemic anti-infectives (principally antibiotics)).
- Clinical outcomes (i.e. healing and putative infection).

If a patient received a bandage or dressing on a specific date, but a clinician visit was not documented in their record, it was assumed the patient had been seen outside of the general practice by a district nurse or healthcare assistant. No other assumptions were made regarding missing data and there were no other interpolations.

The use of individual healthcare resources was quantified for all the patients, individually. These quantities were then used to estimate the total utilisation of each healthcare resource attributable to wound management during the study period, stratified by wound type.

1  
2  
3 Clinical outcomes and wound-related healthcare resource use associated with the sample of  
4 3,000 patients were used to model the healing rates and annual amounts of healthcare resource  
5 use associated with wound care provided by the NHS in 2017/18.  
6  
7  
8  
9

10 Differences between subgroups were tested for statistical significance using a  $\chi^2$  test. Logistic  
11 regression was used to investigate relationships between baseline variables and clinical  
12 outcomes. The p values  $<0.05$  were considered statistically significant and have been reported.  
13 All p values  $\geq 0.05$  were not considered to be statistically significant and these numerical values  
14 have not been reported. All statistical analyses were performed using IBM SPSS Statistics  
15 (IBM UK, Portsmouth, Hampshire, UK).  
16  
17  
18  
19  
20  
21

### 22 **Cost of Patient Management**

23  
24  
25 The NHS cost of wound care for each patient was estimated by assigning unit costs at 2017/18  
26 prices [20-22] to the quantity of healthcare resources used by individual patients from the time  
27 a patient entered the data set (i.e. from 1 March 2017 or the start time of their wound if it  
28 occurred later) up to the time their wound healed or the end of the study period, whichever  
29 came first. The total cost of utilisation of each healthcare resource for the sample of 3,000  
30 patients was then combined in order to estimate their total NHS cost of wound management  
31 over the study period. The NHS cost of wound management for this cohort was then used to  
32 model the total cost of wound care provided by the NHS in 2017/18. The cost of wound care  
33 was also estimated by stratifying patients according to their category of wound. Accordingly,  
34 the study only considers the cost of patient management attributable to wounds in primary and  
35 secondary care settings, and does not estimate patients' overall healthcare costs.  
36  
37  
38  
39  
40  
41  
42  
43  
44  
45

### 46 **Sensitivity Analyses**

47  
48  
49 Bootstrapping was undertaken to estimate the margin of error surrounding the annual  
50 prevalence of wounds and costs. This involved generating subsets of the data of each wound  
51 type on the basis of random sampling and replacing the data once sampled. These subsets  
52 enabled an estimation of the 95% confidence intervals (CI) of (1) the annual number of wounds  
53 managed by the NHS in 2017/18 and (2) the NHS costs of wound management.  
54  
55  
56  
57  
58  
59  
60

1  
2  
3 Deterministic sensitivity analyses were performed on all of the model’s inputs to identify how  
4 the NHS cost of wound management would change by varying the different parameters in the  
5 model.  
6  
7  
8  
9  
10  
11  
12  
13  
14  
15  
16  
17  
18  
19  
20  
21  
22  
23  
24  
25  
26  
27  
28  
29  
30  
31  
32  
33  
34  
35  
36  
37  
38  
39  
40  
41  
42  
43  
44  
45  
46  
47  
48  
49  
50  
51  
52  
53  
54  
55  
56  
57  
58  
59  
60

For peer review only

## RESULTS

### Prevalence of Wounds in the UK

The base population of the THIN database in 2017/18 was 2.4 million active adult patients who were  $\geq 18$  years of age. The database was interrogated, independently of the Authors, to identify patients with at least one of the 2,095 wound-related Read codes. The search identified 174,569 adult patients with a wound in 2017/18 who matched the study protocol's inclusion and exclusion criteria. The UK's population comprised 52.1 million adults who were  $\geq 18$  years of age in mid-2017 [23]. Using these variables, the outputs of the modelling were extrapolated to the whole adult population in the UK. Accordingly, the model estimated that there were 3.8 million adult patients with a wound in the UK in 2017/18 who matched the study protocol's inclusion and exclusion criteria, equivalent to 7% of the adult population (Table 1). Bootstrapping was undertaken using 100 subsets of the counts of each wound type. This indicated the lower and upper 95% confidence intervals of the annual number of wounds managed by the NHS in 2017/18 to be 3.67 million and 3.96 million. Hence, the margin of error surrounding the estimated annual prevalence of wounds is around 3%.

Sixteen per cent of all wounds had no diagnosis and it was not possible to infer a wound type from the patients' records. Additionally, 9% of all wounds were a leg ulcer without any further characterisation (i.e. venous, arterial or mixed). Hence, the records of 25% of all wounds lacked a recorded differential diagnoses. In total, there were 1 million ulcers of the lower limb, which equates to 2.0% of the adult population having a lower limb ulcer in the study year. Of these, the number of diagnosed venous leg ulcers (560,000) indicates that 1.1% of all adults  $\geq 18$  years of age had such an ulcer in the study year. In addition, there were an estimated 326,000 diabetic foot ulcers, which equates to 9% of all adult diabetic patients (i.e. 3.46 million individuals [24]) having a foot ulcer in the study year. There were an estimated 202,000 recorded pressure ulcers in the study year, equivalent to 0.4% of the total adult population (Table 1).

### Patients' Characteristics

A representative sample of 3,000 patients was randomly selected from the cohort of 174,569 patients with a wound-related Read code by IQVIA. Patients' age in the randomly selected study population was a mean of 57.9 years and 67% were  $< 65$  years of age. A total of 56% of

1  
2  
3 patients were female. Mean blood pressure was 130/77 and patients' body mass index was a  
4 mean 29.1 kg/m<sup>2</sup>. An estimated 17% of patients were smokers, 30% were ex-smokers and 52%  
5 were non-smokers. A total of 73% of patients presented with a new wound in the study year  
6 (patients' records predated the onset of the study period, enabling both pre-existing and new  
7 wounds to be identified). Table 2 summarises patients' characteristics according to wound type.  
8  
9

10  
11  
12  
13 The percentage of patients with different comorbidities in the year before the start of their  
14 wound (and not necessarily the year before the start of the study) stratified by wound type is  
15 summarised in Table 3. A total of 95% of patients had at least one comorbidity in the year  
16 before the start of their wound. Moreover, patients had a mean of 4.1 comorbid conditions and  
17 57% of all patients had diabetes. It is also noteworthy that 13% of patients with a pressure ulcer  
18 were recorded as suffering from malnutrition, whereas it was  $\leq 5\%$  of patients with other wound  
19 types.  
20  
21  
22  
23  
24  
25

## 26 27 **Clinical Outcomes**

28  
29  
30 The THIN database does not define wound healing. Wound healing was a clinical observation  
31 documented in the patient's record by their managing clinician, but not necessarily confirmed  
32 by a specialist, and it is unknown if the clinicians who managed these patients used any  
33 consistent definition. Additionally, there is no Read for wound healing. Nevertheless, an  
34 episode of care was not a proxy for time to healing. Furthermore, if a wound was not recorded  
35 as being healed it was considered to be unhealed. This assumption was supported by continued  
36 clinician visits for wound care and the continued prescribing of wound care products. On this  
37 basis, Table 4 summarises the recorded healing rates stratified by wound type and various sub-  
38 groups between 1 March 2017 and 28 February 2018. A total of 70% of all wounds (n = 2.7  
39 million) healed in the study year; 89% of acute wounds healed and 49% of chronic wounds.  
40 An estimated 30% of all wounds (n = 1.1 million) remained unhealed. Patients' age did not  
41 appear to affect the overall healing rate. However, 59% of chronic wounds healed if there was  
42 no evidence of infection compared to 45% if there was a definite or suspected infection. The  
43 healing rate among acute wounds was unaffected by the presence of infection (86% versus 91%  
44 among acute wounds with no evidence of infection). An estimated 38% of chronic wounds  
45 healed if patients were smokers compared to 55% and 58% if patients were non-smokers or ex-  
46 smokers, respectively. Smoking status did not appear to affect the healing rate of acute wounds  
47 (Table 4).  
48  
49  
50  
51  
52  
53  
54  
55  
56  
57  
58  
59  
60



1  
2  
3 For the whole cohort of patients with a wound, binary logistic regression suggested that  
4 cardiovascular disease (Odds ratio (OR) 0.57 (95% CI 0.46 to 0.71);  $p < 0.001$ ), immunological  
5 disorders (OR 0.62 (95% CI 0.45 to 0.86);  $p = 0.003$ ) and renal disorders (OR 0.56 (95% CI  
6 0.43 to 0.73);  $p < 0.001$ ) were independent risk factors for non-healing during the study period.  
7  
8 Additionally, the presence of renal disease was an independent risk factor for non-healing of  
9 diabetic foot ulcers (OR 0.28 (95% CI: 0.13 to 0.62);  $p = 0.002$ ), and diabetes was an  
10 independent risk factor for non-healing of venous leg ulcers (OR 0.10 (95% CI: 0.01 to 0.96);  
11  $p < 0.02$ ).

### 12 13 14 15 16 17 18 19 **Healthcare Resource Use Associated with Patient Management**

20  
21  
22 Patients were predominantly managed in the community by GPs, practice nurses,  
23 district/community nurses and healthcare assistants. Table 5 summarises the percentage of  
24 patients who utilised different resources during the study year and Table 6 shows the annualised  
25 resources associated with each wound type. All the hospital admissions attributable to venous  
26 and mixed leg ulcers appeared to be linked to a suspected infection. So too were 80% of  
27 admissions attributable to diabetic foot ulcers and 95% of admissions attributable to open  
28 wounds. All these hospitalised patients with a suspect infection were prescribed antibiotics. All  
29 the open wounds and 50% of the diabetic foot ulcers healed in the study period, but none of  
30 the venous and mixed leg ulcers healed. Less than 50% of admissions attributable to the other  
31 wound types appeared to be linked to a suspected infection and 90% of them healed during the  
32 study period. Only one-third of admissions attributable to surgical wounds and trauma appeared  
33 to be linked to a suspected infection.

34  
35  
36 Patients' treatment varied according to wound type and wound duration. Patients were  
37 prescribed a mix of dressings up to the time their wound healed or the end of the study period,  
38 whichever came first. Overall, patients' dressings were changed every 3-4 days at a nursing  
39 visit. However, this varied according to wound type. On average:

- 40  
41 • Those patients with a burn or a venous leg ulcer had one nursing visit/dressing change  
42 every 2-3 days.
  - 43  
44 • Those patients with a diabetic foot ulcer, arterial leg ulcer, mixed leg ulcer, pressure ulcer  
45 or surgical wound had one nursing visit/dressing change every 3-4 days.
- 46  
47  
48  
49  
50  
51  
52  
53  
54  
55  
56  
57  
58  
59  
60

- Those patients with an unspecified leg ulcer, open wound, trauma or unspecified wound had one nursing visit/dressing change every 4-5 days.
- Those patients with an abscess had one nursing visit/dressing change every 5-6 days

Less than 1% of patients were prescribed the same dressing for the duration of their wound or study period. On average, patients were prescribed a mean of 8 different dressing types over the study period, ranging from a mean of 4 different dressing types for patients with a burn to a mean of 9 different dressing types for patients with an unclassified wound. In addition to dressings and bandages, varying percentages of patients were prescribed analgesics, NSAIDs and antibiotics as shown in Table 5.

Assessment of peripheral perfusion is a recognised requirement for leg ulcer and diabetic foot management. However, only 15% of all those with a leg or foot ulcer had a Doppler ankle brachial pressure index (ABPI) recorded in their records, of which 75% were prescribed some form of compression. Of the 85% who did not have their ABPI recorded, 29% were prescribed compression bandages/hosiery (Table 7). Over 90% of the patients with a recorded venous leg ulcer were prescribed compression bandages/hosiery, irrespective of whether they had their ABPI recorded; so too did >50% of patients with a recorded diabetic foot ulcer (Table 7).

### **NHS Cost of Patient Management**

The total annual NHS cost of managing 3.8 million patients with a wound was estimated to be £8.3 (95% CI: £7.9; £8.5) billion (Table 8). The use of 100 bootstrapped samples indicated a 5% margin of error around the costs (Table 8). When the bootstrapping was repeated using 1,000 subsets of cost data, the margin of error decreased to 1% (i.e. 95% CI: £8.2; £8.4 billion). District/community nurse visits were the primary cost driver accounting for 29% of all costs and GP office visits were the secondary cost driver accounting for a further 18% of the total cost. Healthcare assistant visits accounted for 17% of the total cost, practice nurse visits for 7% and wound care products for a further 6% (Table 8).

Resource use associated with managing the unhealed wounds was substantially greater than that of managing the healed wounds (Table 9). Consequently, the annual cost of managing the 70% of wounds that healed was estimated to be £2.7 billion compared with £5.6 billion for the

1  
2  
3 30% of wounds that did not heal within the study year. In addition, within the study period, the  
4 cost per healed wound ranged from £358 to £4,684 per patient and that of an unhealed wound  
5 ranged from £831 to £7,886 per patient (Table 10).  
6  
7  
8  
9

10 Eighty one per cent of the total annual NHS cost was incurred in the community and the  
11 remainder in secondary care. However, the distribution of costs varied according to wound  
12 type, with 68% and 85% of the total annual NHS cost of managing acute and chronic wounds,  
13 respectively, being incurred in the community and the remainder in secondary care.  
14  
15  
16  
17

### 18 **Sensitivity Analyses**

19

20  
21  
22 When the healing rate of each wound type was simultaneously varied by  $\pm 25\%$ , the total annual  
23 NHS cost of wound management changed by  $\pm 16\%$ . When the estimated annual number of  
24 each wound type was individually changed by  $\pm 25\%$ , the total annual NHS cost of wound  
25 management changed by 10% or less. When the estimated amounts of resource use were  
26 individually varied by  $\pm 25\%$ , the total annual NHS cost of managing 3.8 million wounds  
27 changed by 7% or less. When the unit costs of wound care products were simultaneously varied  
28 by  $\pm 25\%$ , the total annual NHS cost of managing 3.8 million patients with a wound changed  
29 by  $<3\%$ .  
30  
31  
32  
33  
34  
35  
36  
37  
38  
39  
40  
41  
42  
43  
44  
45  
46  
47  
48  
49  
50  
51  
52  
53  
54  
55  
56  
57  
58  
59  
60

## DISCUSSION

The 2012/13 burden of wounds study [1, 2] incorporated a predictive model [3] which forecast that the prevalence of wounds would increase by 11% per annum. Thus, the model predicted there would be 3.8 million patients with a wound in 2017/18. The findings from the current analysis are consistent with the estimates from this predictive model, with the overall annual number of patients with a wound having increased by 71% over the five years to 3.8 million. However, the rate of increase varied according to wound type. The annual number of patients with a wound increased by  $\geq 100\%$  for many wound types, but some acute wounds increased by 60% and pressure ulcers by only 32%, perhaps due in part to the ongoing pressure ulcer prevention campaign [25]. The model also predicted that costs would increase in parallel with prevalence. However, when the £5.3 billion [1] is updated to 2017/18 prices (i.e. £5.6 billion), it would appear that the annual cost of wound care has increased at an approximate rate of 8-9% per annum. Hence, the overall annual NHS cost of wound care has increased by 48% in real terms over the five years.

The aim of this study was to assess the annual health economic burden of wounds by quantifying the amount of resource use and corresponding costs incurred by patients in 2017/18. From the NHS' perspective, resource use and corresponding cost of managing a patient with multiple wounds does not end until all the wounds heal. Some of the patients in our data set may have had multiple wounds, but this was not specifically listed within the database and was not transparent in the patients' records. Furthermore, it would be very difficult to retrospectively extricate resource use for different wounds from the records of a patient with multiple wounds of the same aetiology. Notwithstanding this, it would be unusual for an individual to have two wounds of different aetiologies at the same time. However, it may be that in 2017/18 some of the patients with an ulcer of the lower limb had a second ulcer, although it would be unlikely that patients with other wounds would have multiple wounds. If 10% of patients with an ulcer of the lower limb had a second ulcer, the total number of wounds would increase by 5% from 3.8 million to 4.0 million. The implication of this is that the NHS may have managed more than 3.8 million wounds in 2017/18. Nevertheless, the estimated amount of resource use and corresponding costs as presented would remain unchanged since all the resources and wound care products utilised in managing each patient were documented in their record (despite the lack of granularity surrounding the number of wounds they may have had).

1  
2  
3 In the 2012/13 data set, 65% of all the patients with a wound were 65 years of age or older [1,  
4 2]. However, in the 2017/18 data set, only 33% of patients were 65 years of age or older. This  
5 was a significant difference ( $p < 0.001$ ), suggesting that wounds are no longer predominantly  
6 the preserve of the elderly. In 2012/13, 39% of all patients were non-smokers. However, by  
7 2017/18 this percentage had increased significantly to 52% ( $p < 0.001$ ). In parallel with these  
8 changes in the patient demographics there was a change in the distribution of comorbidities. In  
9 particular, in 2012/13, 73% and 37% of patients had cardiovascular and musculoskeletal  
10 disorders, but in 2017/18 an estimated 53% ( $p < 0.001$ ) and 56% ( $p < 0.02$ ) had cardiovascular  
11 and musculoskeletal disorders, respectively. Most striking, however, was that 29% of the  
12 2012/13 cohort had diabetes compared with 57% in 2017/18 ( $p < 0.05$ ). Additionally, the  
13 variation in the mean number of comorbidities associated with different wound types in this  
14 study parallels the variation in Charlson Comorbidity Index associated with different wound  
15 types observed in a patient population in Asia [26].  
16  
17  
18  
19  
20  
21  
22  
23  
24  
25

26  
27 Over the five year period, the healing rate of acute wounds increased by a mean of 13% and  
28 that of chronic wounds by a mean of 15%. However, within this estimate, the healing rate of  
29 diabetic foot ulcers and pressure ulcers increased by 27% and 43%, respectively, but the  
30 healing rate of venous and mixed leg ulcers decreased by 21% and 28%, respectively. The  
31 percentage of patients accessing different resources increased over the five years and so too  
32 did the absolute amount of resource use. For example, between 2012/13 and 2017/18 there was  
33 >11,000% increase in the number of healthcare assistant visits (from 0.5 million to 53.6  
34 million), a 401% increase in the number of district nurse visits (from 10.9 million to 54.4  
35 million), 164% increase in the number of GP visits (from 7.7 million to 20.3 million), 96%  
36 increase in the number of hospital outpatient visits (from 3.4 million to 6.8 million) and 51%  
37 increase in the number of practice nurse visits (from 18.6 million to 28.1 million). In addition,  
38 there was a 2% decrease in the number of specialist nurse visits and a 104% increase in the  
39 amount of wound care products used. The changes in the annual cost of these resources mirror  
40 the changes in utilisation of these resources. Accordingly, the NHS cost of wound care in  
41 2017/18 was an estimated £8.3 billion, which is approaching the combined annual NHS cost  
42 of managing osteo and rheumatoid arthritis, which was reported to be £10.2 billion in 2017  
43 [27].  
44  
45  
46  
47  
48  
49  
50  
51  
52  
53  
54  
55

56  
57  
58 The shift towards greater utilisation of community-based resources is reflected in the  
59 distribution of care between secondary care and the community. In 2012/13, 48% of the costs  
60

1  
2  
3 of managing acute wounds and 78% of the costs of managing chronic wounds were incurred  
4 in the community and the remainder in secondary care [1, 2]. In 2017/18, 68% and 85% of the  
5 costs of managing acute and chronic wounds, respectively, were incurred in the community  
6 and the remainder in secondary care.  
7  
8  
9

10  
11 This present study has also highlighted that resource use associated with managing the 30% of  
12 wounds that did not heal in the study year was substantially greater than that of managing the  
13 70% of wounds that did heal within the study year (e.g. 325% more hospital outpatient visits,  
14 178% more practice nurse visits, 171% more GP visits, 118% more accident & emergency  
15 attendances, 97% more district/community nurse visits and 85% more healthcare assistant  
16 visits). Consequently, the annual cost of managing wounds that healed within the study year  
17 was estimated to be £2.7 billion compared with £5.6 billion for the 30% of wounds that did not  
18 heal within the study year. In addition, the mean cost of an unhealed wound (£3,700) was  
19 approximately 2.5 times more than that of a wound that healed during the study period  
20 (£1,500). Sensitivity analysis showed the healing rate to have a large effect on the cost of  
21 wound care and regression analysis indicated that the presence of cardiovascular disease or  
22 immunological disorders or renal disorders were all independent risk factors for non-healing  
23 during the study period. In the 2012/13 study both nutritional deficiency and diabetes were  
24 independent risk factors for non-healing during the study period [1]. In this study, only a mean  
25 of 3% of patients had malnutrition, possible reflecting the significantly lower age of the study  
26 population. However, 13% of patients with a pressure ulcer had malnutrition and their BMI  
27 was a mean of 24.5 kg/m<sup>2</sup> which was lower than that of patients with other wound types.  
28 Diabetes did not exert an independent effect on healing possibly because 59% of the patients  
29 with diabetes also had cardiovascular disease, 19% had renal disease, and 11% had  
30 immunological disorders. In addition, 61% of the patients with diabetes had musculoskeletal  
31 disorders and 38% had a mental health condition (principally depression and anxiety). The age  
32 of the patients with diabetes was a mean of 59.2 years per patient and 44% were male.  
33  
34  
35  
36  
37  
38  
39  
40  
41  
42  
43  
44  
45  
46  
47  
48  
49  
50

51 This and many other studies [10-12, 28, 29] have shown that wound management is  
52 predominantly a nurse-led discipline. Nevertheless, there still seems to be minimal clinical  
53 involvement of tissue viability nurses and other specialist nurses in direct patient management.  
54 In addition, dressing and bandage types were continually switched at successive wound  
55 dressing changes for the majority of patients, suggesting confusion and conflict within the  
56 treatment plan. It was not possible to determine which professional groups were the decision  
57  
58  
59  
60



1  
2  
3 makers in relation to change in dressing type and what the goal of treatment changes were as  
4 this information was not specifically recorded in the patients' records. Moreover, an estimated  
5 25% of all wounds being managed within the NHS in 2017/18 lacked a recorded differential  
6 diagnosis in the patient's record. Furthermore, only 15% of patients with an ulcer on the lower  
7 limb had a vascular assessment with Doppler ABPI recorded in their records, contrary to  
8 national guidance [30, 31]. Nevertheless, we observed a 14% decrease in the proportion of  
9 patients with unspecified leg ulcers since 2015 which may be due to an increase in measuring  
10 ABPI even if it was not documented in the patients' records. It remains unclear and  
11 disappointing to find that records still lacked documentation of this essential investigation.  
12 Moreover, five years later, patients' records still appear to lack any evidence of consistent  
13 reporting of wound management processes. This may be indicative of the difficulties  
14 experienced by non-specialist health care professionals in the community with establishing a  
15 working diagnosis.  
16  
17  
18  
19  
20  
21  
22  
23  
24  
25  
26

27 It seems unclear how the NHS can best respond to the ever increasing demand for wound care.  
28 The NHS Long Term Plan [32] has described how the NHS will move to a new service model  
29 in which patients will have properly joined-up care at the right time in the optimal care setting.  
30 This will involve having online 'digital' GP consultations, and redesigned hospital support in  
31 order to free-up about one-third of outpatient appointments [32]. Additionally, GP practices  
32 will be funded to create integrated teams of GPs, community health and social care staff [32].  
33 These expanded community health teams will provide fast support to people in their own  
34 homes [32]. Ultimately, the NHS will aim to create Integrated Care Systems everywhere by  
35 April 2021, which bring together local organisations to deliver a 'triple integration' of primary  
36 and specialist care, physical and mental health services and health with social care [32].  
37 Additionally, commissioners will be tasked to share decisions with providers on population  
38 health, service redesign and Long Term Plan implementation [32]. Such a change in the system  
39 may facilitate getting the optimum care to patients at the right time in the right setting in order  
40 to improve the patient experience and health outcomes, thereby freeing-up healthcare resources  
41 and reducing costs. However, will this method of care delivery improve wound care and patient  
42 outcomes? The introduction of truly seamless care with integrated electronic patient records  
43 would improve overall patient management, However, patients with wounds need face-to-face  
44 interaction with clinicians on a regular basis to monitor progress and have their dressings  
45 changed. The Authors are therefore of the opinion that this model would require the NHS to  
46 establish dedicated wound care clinics in the community at which patients receive consistent  
47  
48  
49  
50  
51  
52  
53  
54  
55  
56  
57  
58  
59  
60



1  
2  
3 and integrated care from clinicians with qualified experience in wound care, with the clinics  
4 linking directly to electronic patient records which are integrated across all healthcare sectors.  
5 These clinics could provide both direct care and holistic assessments of patients allowing co-  
6 ordinated management of any comorbidities which may impact on wound healing  
7  
8  
9

10  
11 The advantages and disadvantages of using the THIN database for this study have been  
12 previously discussed [1]. In summary, the advantage of using the THIN database is that the  
13 patient pathways and associated resource use are based on real-world evidence derived from  
14 clinical practice. However, the possibility of resource use associated with managing a  
15 comorbidity being conflated with that of wound management cannot be excluded. While the  
16 study results are compelling, the analyses were based on clinicians' entries into their patients'  
17 records and inevitably subject to a certain amount of imprecision and lack of detail. Moreover,  
18 the computerised information in the THIN database is collected by GPs for clinical care  
19 purposes and not for research. Prescriptions issued by GPs and practice nurses are recorded in  
20 the database, but it does not specify whether the prescriptions were dispensed or detail patient  
21 compliance with the product. Despite these limitations, it is the authors' opinion that the THIN  
22 database affords one of the best sources of real-world evidence for clinical practice in the UK,  
23 since it is representative of the whole UK population [18, 33] and there are only minor  
24 differences between this and other real-world evidence databases in the UK [33]. Moreover,  
25 the changes between 2012/13 and 2017/18 are clinically relevant, since the sample size in this  
26 study is 3,000 patients versus 1,000 patients in the earlier study. Furthermore a review of  
27 Medline in August 2020 identified 283 articles in peer-reviewed journals in which the THIN  
28 database had been used to characterise clinical practice in a wide range of therapeutic areas in  
29 the UK, of which 28 had been published in BMJ Open since 2014. Notwithstanding this, it is  
30 not possible to ascertain from the data set whether some of the changes between 2012/13 and  
31 2017/18 are due to increased complexity of wound aetiology and a decrease in competency of  
32 the clinical staff caring for these patients. There is no recognised complexity index/score for  
33 wounds so any measure of this would be subjective. Additionally, the low involvement of  
34 senior staff in patient management may indicate competency as a possible issue, but this cannot  
35 be quantified.  
36  
37  
38  
39  
40  
41  
42  
43  
44  
45  
46  
47  
48  
49  
50  
51  
52  
53  
54  
55

56 The analysis does not consider the potential impact of those wounds that remained unhealed  
57 beyond the study period. The THIN database may have under-recorded use of some health care  
58 resources outside the GP's surgery if not documented in the GP records, and the impact of this  
59  
60

1  
2  
3 was addressed in sensitivity analyses. In particular, not all community records may have been  
4 linked to the GP records. The analysis excludes hospital-based prescribing, but this should have  
5 minimal impact on the results as most prescribing is undertaken by GPs and nurses in the  
6 community. Also excluded is the potential impact of managing patients with wounds being  
7 cared for in nursing/residential homes.  
8  
9  
10

11  
12  
13 The analysis only considered the annual cost of NHS resource use for the ‘average adult  
14 patient’, and no attempt was made to stratify resource use and costs according to gender,  
15 comorbidities, wound size, wound severity and other disease-related factors. Also excluded  
16 were the costs incurred by patients and indirect societal costs as a result of patients taking time  
17 off work. In 2012/13, only 35% of patients with a wound were of working age. However, in  
18 2017/18 nearly 70% of the cohort was less than 65 years of age and 6% of patients in this age  
19 group were admitted into hospital. In April 2018 the gross median salary for full-time  
20 employees was £569 per week [34]. Hence, the indirect societal cost in lost GDP arising from  
21 hospitalisation (assuming 96% of these patients were in full-time employment [35]) amounted  
22 to £87 million. This is likely to be an underestimate, since a proportion of patients are likely to  
23 be absent from work due to their wound, but residing in their home. Nevertheless, this is a  
24 relatively negligible indirect cost considering that nocturia (which predominantly affects the  
25 elderly population) accounts for over £4 billion in lost GDP [36].  
26  
27  
28  
29  
30  
31  
32  
33  
34  
35  
36

37 Notwithstanding the study’s limitations, the real-world evidence highlights the substantial  
38 burden that wounds continue to impose on the NHS in an average year. Clinical and economic  
39 benefits to both patients and the NHS could accrue from strategies that focus on (a) accurate  
40 diagnosis, (b) preventing infection and (c) improving wound-healing rates. However, these  
41 benefits are unlikely to be realised unless there is a structural change within the NHS in order  
42 to manage the increasing demand for wound care.  
43  
44  
45  
46  
47  
48  
49  
50  
51  
52  
53  
54  
55  
56  
57  
58  
59  
60

## ACKNOWLEDGEMENTS

The authors thank Kathryn Vowden, University of Bradford, Bradford, UK, for her appraisal and input into this manuscript.

## CONTRIBUTORSHIP STATEMENT

J.F.G. designed the study, obtained the THIN data set, managed the analyses, performed some analyses, checked all the other analyses, and wrote the manuscript.

G.W.F. conducted much of the analyses.

P.V. scrutinised the analyses, suggested further analyses and helped interpret some of the findings.

All the authors were involved in revising the manuscript and gave final approval. J.F.G. is the guarantor of this work and, as such, had full access to all the data in the study and takes responsibility for the integrity of the data and the accuracy of the data analysis.

## COMPETING INTERESTS

None declared.

## FUNDING

This study was funded by J.F.G., the lead author and a donation from Essity, Hull, UK.

## DATA SHARING STATEMENT

The THIN data set cannot be shared as this restriction was a condition of the ethics approval obtained from the Research Ethics Committee (Reference number 18THIN093). Questions concerning the data underlying the results can be sent to the Corresponding Author.

For peer review only

**REFERENCES**

1. Guest JF, Ayoub N, McIlwraith T, Uchegbu I, Gerrish A, Weidlich D et al. Health economic burden that wounds impose on the National Health Service in the UK. *BMJ Open*. 2015;5(12):e009283. doi:10.1136/bmjopen-2015-009283.
2. Guest JF, Ayoub N, McIlwraith T, Uchegbu I, Gerrish A, Weidlich D et al. Health economic burden that different wound types impose on the UK's National Health Service. *Int Wound J*. 2016. doi:10.1111/iwj.12603.
3. Guest JF, Vowden K, Vowden P. The health economic burden that acute and chronic wounds impose on an average clinical commissioning group/health board in the UK. *J Wound Care*. 2017;26(6):292-303. doi:10.12968/jowc.2017.26.6.292.
4. House of Lords Hansard. House of Lords debate on developing a strategy for improving the standards of wound care in the NHS. 2017. <https://hansard.parliament.uk/lords/2017-11-22/debates/6C57E65A-A04D-449B-82E9-C836F088A696/NHSWoundCare>.
5. NHS England. National Wound Care Strategy Programme. <https://www.ahsnnetwork.com/about-academic-health-science-networks/national-programmes-priorities/national-wound-care-strategy-programme>.
6. NHS Digital. general\_practice\_provisional\_tables\_december\_2017\_-\_nurse. 2018. <https://digital.nhs.uk/data-and-information/publications/statistical/general-and-personal-medical-services/as-at-31-december-2017-provisional-experimental-statistics>.
7. NHS Digital. nhs-staf-sept-2016-summ. 2017. <https://digital.nhs.uk/data-and-information/publications/statistical/nhs-workforce-statistics/nhs-workforce-statistics-november-2016-provisional-statistics>.
8. House of Commons Health Committee. The nursing workforce - Second Report of Session 2017–19: HC353,. 2018. <https://publications.parliament.uk/pa/cm201719/cmselect/cmhealth/353/353.pdf>.
9. Royal College of Nursing. The UK nursing labour market review 2018. 2018. <https://www.rcn.org.uk>
10. Guest JF, Fuller GW, Vowden P. Clinical outcomes and cost-effectiveness of three different compression systems in newly-diagnosed venous leg ulcers in the UK. *J Wound Care*. 2017;26(5):244-54. doi:10.12968/jowc.2017.26.5.244.
11. Guest JF, Singh H, Rana K, Vowden P. Cost-effectiveness of an electroceutical device in treating non-healing venous leg ulcers: results of an RCT. *J Wound Care*. 2018;27(4):230-43. doi:10.12968/jowc.2018.27.4.230.

12. Panca M, Cutting K, Guest JF. Clinical and cost-effectiveness of absorbent dressings in the treatment of highly exuding VLU. *J Wound Care*. 2013;22(3):109-18. doi:10.12968/jowc.2013.22.3.109.
13. Guest JF, Fuller GW, Vowden P. Diabetic foot ulcer management in clinical practice in the UK: costs and outcomes. *Int Wound J*. 2018;15(1):43-52. doi:10.1111/iwj.12816.
14. Guest JF, Fuller GW, Vowden P. Venous leg ulcer management in clinical practice in the UK: costs and outcomes. *Int Wound J*. 2018;15(1):29-37. doi:10.1111/iwj.12814.
15. Guest JF, Fuller GW, Vowden P, Vowden KR. Cohort study evaluating pressure ulcer management in clinical practice in the UK following initial presentation in the community: costs and outcomes. *BMJ Open*. 2018;8(7):e021769. doi:10.1136/bmjopen-2018-021769.
16. Guest JF, Fuller GW, Vowden P. Costs and outcomes in evaluating management of unhealed surgical wounds in the community in clinical practice in the UK: a cohort study. *BMJ Open*. 2018;8(12):e022591. doi:10.1136/bmjopen-2018-022591.
17. Alderwick H, Robertson R, Appleby J, Dunn P, Maguire D. Better value in the NHS. The role of changes in clinical practice. 2015. [www.kingsfund.org.uk](http://www.kingsfund.org.uk).
18. Blak BT, Thompson M, Dattani H, Bourke A. Generalisability of The Health Improvement Network (THIN) database: demographics, chronic disease prevalence and mortality rates. *Inform Prim Care*. 2011;19(4):251-5.
19. NHS Digital. Read Codes. 2018. <https://digital.nhs.uk/article/1104/Read-Codes>. Accessed 10 March 2018.
20. Curtis L, Burns A. Unit Costs of Health and Social Care 2019. University of Kent, Personal Social Services Research Unit, Canterbury. 2019. <https://www.pssru.ac.uk/project-pages/unit-costs/unit-costs-2019/>. Accessed 1 July 2020.
21. Department of Health. National Schedule of NHS reference costs 2018/19. <https://improvement.nhs.uk/resources/reference-costs>. Accessed 1 July 2020.
22. Drug Tariff. Drug Tariff. 2019. <https://www.drugtariff.co.uk>. Accessed 1 July 2020.
23. Office for National Statistics. 2017. <https://www.ons.gov.uk/peoplepopulationandcommunity/populationandmigration/populationestimates/datasets/populationestimatesforukenglandandwalesscotlandandnorthernireland>.
24. Diabetes UK. Facts and Figures. 2019. <https://www.diabetes.org.uk/professionals/position-statements-reports/statistics>.
25. React to red skin. <http://www.reactoredskin.co.uk/>.

- 1  
2  
3 26. Lo ZJ, Lim X, Eng D, Car J, Hong Q, Yong E et al. Clinical and economic burden of  
4 wound care in the tropics: a 5-year institutional population health review. *Int Wound J*.  
5 2020;17(3):790-803. doi:10.1111/iwj.13333.  
6  
7  
8 27. Arthritis Research UK. The Nation's Joint Problem. 2017.  
9 <https://www.arthritisresearch.org.uk>.  
10  
11 28. Guest JF, Taylor RR, Vowden K, Vowden P. Relative cost-effectiveness of a skin  
12 protectant in managing venous leg ulcers in the UK. *J Wound Care*. 2012;21(8):389-98.  
13 doi:10.12968/jowc.2012.21.8.389.  
14  
15 29. Guest JF, Ayoub N, Greaves T. Clinical outcomes and cost-effectiveness of an externally  
16 applied electroceutical device in managing venous leg ulcers in clinical practice in the UK. *J*  
17 *Wound Care*. 2015;24(12):572-80. doi:10.12968/jowc.2015.24.12.572.  
18  
19 30. Scottish Intercollegiate Guidelines Network. SIGN guideline 120: management of chronic  
20 venous leg ulcers. 2010. 2010. <http://sign.ac.uk/pdf/sign120.pdf>.  
21  
22 31. National Institute for Health and Care Excellence (NICE). Diabetic foot problems:  
23 prevention and management. NICE guidelines [NG19] 2015. 2015. [https://](https://nice.org.uk/guidance/ng19)  
24 [nice.org.uk/guidance/ng19](https://nice.org.uk/guidance/ng19). Accessed 30 November 2016.  
25  
26 32. NHS England. The NHS Long Term Plan. 2019. <https://www.longtermplan.nhs.uk/>.  
27  
28 33. Kneale D, Khatwa M, Thomas J. Identifying and appraising promising sources of UK  
29 clinical, health and social care data for use by NICE. 2016.  
30 <https://eppi.ioe.ac.uk/cms/Default.aspx?tabid=3673>.  
31  
32 34. Office for NaTIONAL Statistics. Employee earnings in the UK: 2018. 2018.  
33 [https://www.ons.gov.uk/employmentandlabourmarket/peopleinwork/earningsandworkinghou](https://www.ons.gov.uk/employmentandlabourmarket/peopleinwork/earningsandworkinghours/bulletins/annualsurveyofhoursandearnings/2018)  
34 [rs/bulletins/annualsurveyofhoursandearnings/2018](https://www.ons.gov.uk/employmentandlabourmarket/peopleinwork/earningsandworkinghours/bulletins/annualsurveyofhoursandearnings/2018).  
35  
36 35. Office for National Statistics. Unemployment. 2018.  
37 <https://www.ons.gov.uk/employmentandlabourmarket/peoplenotinwork/unemployment>.  
38  
39 36. Weidlich D, Andersson FL, Oelke M, Drake MJ, Jonasson AF, Guest JF. Annual direct  
40 and indirect costs attributable to nocturia in Germany, Sweden, and the UK. *Eur J Health*  
41 *Econ*. 2017;18(6):761-71. doi:10.1007/s10198-016-0826-x.  
42  
43  
44  
45  
46  
47  
48  
49  
50  
51  
52  
53  
54  
55  
56  
57  
58  
59  
60



**Table 1: Annual number of adult patients with a wound and prevalence of different wound types in the UK. Percentage of total number in parentheses.**

|                         | Annual number of patients with a wound in 2017/18 (thousands) | Annual prevalence among the adult UK population in 2017/18 | Annual number of patients with a wound in 2012/13 (thousands) [1] | Percentage change in the annual number of patients with a wound between 2012/13 and 2017/18 |
|-------------------------|---------------------------------------------------------------|------------------------------------------------------------|-------------------------------------------------------------------|---------------------------------------------------------------------------------------------|
| Abscess                 | 293,000 (8%)                                                  | 0.0056                                                     | 160,000 (7%)                                                      | 83%                                                                                         |
| Burn                    | 222,000 (6%)                                                  | 0.0043                                                     | 87,000 (4%)                                                       | 155%                                                                                        |
| Diabetic foot ulcer     | 326,000 (9%)                                                  | 0.0063                                                     | 169,000 (8%)                                                      | 93%                                                                                         |
| Leg ulcer (arterial)    | 31,000 (1%)                                                   | 0.0022                                                     | 9,000 (<1%)                                                       | 244%                                                                                        |
| Leg ulcer (mixed)       | 102,000 (3%)                                                  | 0.0003                                                     | 24,000 (1%)                                                       | 325%                                                                                        |
| Leg ulcer (unspecified) | 361,000 (9%)                                                  | 0.0069                                                     | 420,000 (19%)                                                     | -14%                                                                                        |
| Leg ulcer (venous)      | 560,000 (15%)                                                 | 0.0108                                                     | 278,000 (13%)                                                     | 101%                                                                                        |
| Open wound              | 337,000 (9%)                                                  | 0.0065                                                     | 240,000 (11%)                                                     | 40%                                                                                         |
| Pressure ulcer          | 202,000 (5%)                                                  | 0.0039                                                     | 153,000 (7%)                                                      | 32%                                                                                         |
| Surgical wound          | 519,000 (14%)                                                 | 0.0100                                                     | 253,000 (11%)                                                     | 105%                                                                                        |
| Trauma                  | 249,000 (7%)                                                  | 0.0048                                                     | 158,000 (7%)                                                      | 58%                                                                                         |
| Unspecified             | 600,000 (16%)                                                 | 0.0115                                                     | 271,000 (12%)                                                     | 121%                                                                                        |
| <b>TOTAL</b>            | <b>3,802,000 (100%)</b>                                       | <b>0.0730</b>                                              | <b>2,222,000 (100%)</b>                                           | <b>71%</b>                                                                                  |

**Table 2: Patients' baseline characteristics.**

|                                                          | Abscess | Burn | Diabetic<br>foot ulcer | Leg ulcer<br>(arterial) | Leg ulcer<br>(mixed) | Leg ulcer<br>(unspecified) | Leg ulcer<br>(venous) | Open<br>wound | Pressure<br>ulcer | Surgical<br>wound | Trauma | Unspecified | All<br>wounds |
|----------------------------------------------------------|---------|------|------------------------|-------------------------|----------------------|----------------------------|-----------------------|---------------|-------------------|-------------------|--------|-------------|---------------|
| Mean age per patient<br>(years)                          | 46.0    | 47.1 | 62.3                   | 57.4                    | 67.0                 | 52.6                       | 70.9                  | 53.4          | 76.1              | 55.4              | 52.4   | 55.9        | 57.9          |
| Percentage male                                          | 42%     | 35%  | 51%                    | 22%                     | 57%                  | 39%                        | 48%                   | 40%           | 40%               | 42%               | 41%    | 49%         | 44%           |
| Percentage smoker                                        | 29%     | 24%  | 11%                    | 13%                     | 10%                  | 21%                        | 7%                    | 18%           | 7%                | 19%               | 16%    | 22%         | 17%           |
| Percentage ex-smoker                                     | 19%     | 19%  | 37%                    | 32%                     | 30%                  | 21%                        | 44%                   | 29%           | 40%               | 29%               | 23%    | 28%         | 30%           |
| Percentage non-<br>smoker                                | 51%     | 56%  | 52%                    | 55%                     | 60%                  | 58%                        | 48%                   | 51%           | 40%               | 52%               | 59%    | 49%         | 52%           |
| Percentage with<br>unknown smoking<br>status             | 2%      | 0%   | 0%                     | 0%                      | 0%                   | 0%                         | 0%                    | 2%            | 13%               | 1%                | 1%     | 1%          | 1%            |
| Mean body mass index<br>per patient (kg/m <sup>2</sup> ) | 29.7    | 27.9 | 30.9                   | 28.8                    | 32.3                 | 27.6                       | 31.5                  | 29.6          | 24.5              | 28.3              | 27.8   | 28.9        | 29.1          |
| Percentage with new<br>wounds in the study<br>period     | 79%     | 79%  | 61%                    | 33%                     | 50%                  | 68%                        | 59%                   | 87%           | 80%               | 77%               | 84%    | 80%         | 73%           |
| Percentage of all<br>wounds with a<br>recorded infection | 27%     | 13%  | 78%                    | 52%                     | 47%                  | 68%                        | 41%                   | 94%           | 13%               | 35%               | 29%    | 1%          | 40%           |

**Table 3: Percentage of patients with a comorbidity in the year before the start of their wound.** Those with diabetes are a subset of those with endocrinological comorbidities.

|                                          | Abscess | Burn | Diabetic foot ulcer | Leg ulcer (arterial) | Leg ulcer (mixed) | Leg ulcer (unspecified) | Leg ulcer (venous) | Open wound | Pressure ulcer | Surgical wound | Trauma | Unspecified | All wounds |
|------------------------------------------|---------|------|---------------------|----------------------|-------------------|-------------------------|--------------------|------------|----------------|----------------|--------|-------------|------------|
| Cardiovascular                           | 36%     | 35%  | 70%                 | 67%                  | 83%               | 45%                     | 78%                | 44%        | 53%            | 47%            | 38%    | 51%         | 53%        |
| Dermatological                           | 48%     | 52%  | 60%                 | 44%                  | 63%               | 50%                     | 41%                | 51%        | 40%            | 51%            | 54%    | 45%         | 49%        |
| Endocrinological                         | 52%     | 56%  | 99%                 | 78%                  | 97%               | 18%                     | 52%                | 69%        | 60%            | 63%            | 55%    | 57%         | 60%        |
| Diabetes                                 | 50%     | 52%  | 100%                | 78%                  | 97%               | 13%                     | 37%                | 67%        | 60%            | 59%            | 51%    | 52%         | 57%        |
| Gastroenterological                      | 29%     | 32%  | 42%                 | 67%                  | 33%               | 29%                     | 19%                | 34%        | 47%            | 37%            | 31%    | 35%         | 33%        |
| Genito-urinary                           | 21%     | 24%  | 28%                 | 44%                  | 33%               | 18%                     | 19%                | 25%        | 27%            | 28%            | 24%    | 24%         | 24%        |
| Immunological                            | 7%      | 11%  | 13%                 | 11%                  | 17%               | 3%                      | 11%                | 10%        | 7%             | 9%             | 8%     | 9%          | 9%         |
| Malnutrition                             | 0%      | 2%   | 2%                  | 0%                   | 0%                | 5%                      | 4%                 | 1%         | 13%            | 1%             | 2%     | 3%          | 3%         |
| Musculoskeletal                          | 41%     | 56%  | 62%                 | 67%                  | 63%               | 61%                     | 59%                | 49%        | 73%            | 57%            | 49%    | 56%         | 56%        |
| Neurological                             | 16%     | 21%  | 24%                 | 11%                  | 27%               | 24%                     | 33%                | 18%        | 67%            | 22%            | 17%    | 17%         | 24%        |
| Oncological                              | 14%     | 16%  | 25%                 | 11%                  | 20%               | 16%                     | 7%                 | 14%        | 27%            | 18%            | 15%    | 19%         | 16%        |
| Ophthalmological                         | 8%      | 15%  | 20%                 | 0%                   | 27%               | 13%                     | 4%                 | 11%        | 33%            | 13%            | 11%    | 10%         | 12%        |
| Psychiatric                              | 44%     | 40%  | 39%                 | 33%                  | 53%               | 47%                     | 15%                | 35%        | 33%            | 35%            | 32%    | 35%         | 35%        |
| Renal                                    | 8%      | 5%   | 30%                 | 22%                  | 33%               | 13%                     | 30%                | 12%        | 40%            | 14%            | 9%     | 16%         | 18%        |
| Respiratory                              | 38%     | 44%  | 45%                 | 56%                  | 43%               | 42%                     | 33%                | 36%        | 33%            | 38%            | 36%    | 37%         | 38%        |
| Mean number of comorbidities per patient | 3.7     | 4.1  | 5.7                 | 6.0                  | 5.7               | 3.9                     | 4.0                | 4.1        | 5.6            | 4.3            | 3.8    | 4.2         | 4.1        |

**Table 4: Healing rates in the study period.**

|                                                        | Abscess | Burn | Diabetic foot ulcer | Leg ulcer (arterial) | Leg ulcer (mixed) | Leg ulcer (unspecified) | Leg ulcer (venous) | Open wound | Pressure ulcer | Surgical wound | Trauma | Unspecified | All wounds |
|--------------------------------------------------------|---------|------|---------------------|----------------------|-------------------|-------------------------|--------------------|------------|----------------|----------------|--------|-------------|------------|
| Wounds that healed in the study period                 | 86%     | 84%  | 52%                 | 47%                  | 30%               | 55%                     | 37%                | 90%        | 60%            | 85%            | 94%    | 85%         | 70%        |
| New wounds that healed in the study period             | 85%     | 80%  | 60%                 | 40%                  | 27%               | 38%                     | 56%                | 90%        | 75%            | 86%            | 94%    | 88%         | 76%        |
| Existing wounds that healed in the study period        | 89%     | 96%  | 40%                 | 50%                  | 33%               | 92%                     | 9%                 | 90%        | 0%             | 80%            | 96%    | 73%         | 56%        |
| Wounds that healed with no evidence of infection       | 92%     | 85%  | 57%                 | 50%                  | 34%               | 60%                     | 50%                | 93%        | 62%            | 87%            | 95%    | 86%         | 77%        |
| Wounds that healed with recorded evidence of infection | 69%     | 75%  | 50%                 | 45%                  | 25%               | 52%                     | 18%                | 89%        | 50%            | 81%            | 91%    | 38%         | 60%        |
| Wounds that healed among smokers                       | 84%     | 87%  | 33%                 | 37%                  | 28%               | 48%                     | 25%                | 88%        | 33%            | 82%            | 96%    | 85%         | 64%        |
| Wounds that healed among ex-smokers                    | 90%     | 75%  | 53%                 | 47%                  | 32%               | 53%                     | 39%                | 88%        | 67%            | 83%            | 95%    | 88%         | 70%        |
| Wounds that healed among non-smokers                   | 87%     | 87%  | 56%                 | 50%                  | 30%               | 58%                     | 38%                | 93%        | 75%            | 88%            | 96%    | 84%         | 74%        |

**Table 5: Percentage of patients who utilised resources in the study year. \*Includes tissue viability nurses and diabetic nurse specialists.**

|                                                         | Abscess | Burn | Diabetic foot ulcer | Leg ulcer (arterial) | Leg ulcer (mixed) | Leg ulcer (unspecified) | Leg ulcer (venous) | Open wound | Pressure ulcer | Surgical wound | Trauma | Unspecified | All wounds |
|---------------------------------------------------------|---------|------|---------------------|----------------------|-------------------|-------------------------|--------------------|------------|----------------|----------------|--------|-------------|------------|
| District/community nurse visits                         | 37%     | 52%  | 96%                 | 89%                  | 93%               | 82%                     | 85%                | 24%        | 60%            | 46%            | 15%    | 44%         | 38%        |
| Healthcare assistant visits                             | 32%     | 27%  | 93%                 | 89%                  | 99%               | 84%                     | 81%                | 21%        | 40%            | 46%            | 15%    | 44%         | 36%        |
| Practice nurse visits                                   | 96%     | 94%  | 94%                 | 100%                 | 100%              | 79%                     | 96%                | 97%        | 93%            | 97%            | 98%    | 98%         | 97%        |
| GP office visits                                        | 94%     | 79%  | 97%                 | 100%                 | 100%              | 100%                    | 100%               | 90%        | 93%            | 82%            | 93%    | 62%         | 84%        |
| Dressings                                               | 100%    | 100% | 100%                | 100%                 | 100%              | 100%                    | 100%               | 100%       | 100%           | 100%           | 100%   | 100%        | 100%       |
| Compression bandaging/hosiery                           | 2%      | 5%   | 15%                 | 0%                   | 100%              | 26%                     | 93%                | 5%         | 0%             | 3%             | 0%     | 6%          | 6%         |
| Prescribed analgesics/non-steroidal anti-inflammatories | 22%     | 19%  | 57%                 | 67%                  | 87%               | 32%                     | 81%                | 12%        | 53%            | 24%            | 10%    | 20%         | 21%        |
| Prescribed antibiotics                                  | 82%     | 42%  | 92%                 | 97%                  | 90%               | 84%                     | 81%                | 81%        | 67%            | 43%            | 37%    | 26%         | 50%        |
| Hospital outpatient visits with a nurse                 | 11%     | 32%  | 35%                 | 22%                  | 33%               | 16%                     | 37%                | 8%         | 0%             | 18%            | 5%     | 31%         | 17%        |
| Accident & emergency attendances                        | 16%     | 18%  | 23%                 | 22%                  | 27%               | 5%                      | 30%                | 8%         | 7%             | 8%             | 5%     | 4%          | 8%         |
| Hospital admissions without surgery                     | 7%      | 8%   | 4%                  | 0%                   | 3%                | 5%                      | 7%                 | 7%         | 13%            | 8%             | 5%     | 8%          | 7%         |
| Hospital outpatient visits with a physician/surgeon     | 4%      | 0%   | 15%                 | 22%                  | 7%                | 8%                      | 7%                 | 4%         | 20%            | 8%             | 7%     | 1%          | 5%         |
| GP home visits                                          | 2%      | 3%   | 2%                  | 0%                   | 10%               | 0%                      | 11%                | 1%         | 13%            | 2%             | 1%     | 1%          | 2%         |
| Diagnostic tests                                        | 1%      | 2%   | 3%                  | 0%                   | 10%               | 3%                      | 0%                 | 1%         | 0%             | 2%             | 1%     | 3%          | 2%         |
| Ambulance services                                      | 1%      | 0%   | 3%                  | 0%                   | 3%                | 0%                      | 4%                 | 0%         | 0%             | 1%             | 0%     | 1%          | 1%         |
| Hospital admissions with surgery                        | 2%      | 2%   | 2%                  | 0%                   | 0%                | 0%                      | 0%                 | 0%         | 0%             | 6%             | 1%     | 0%          | 2%         |
| Specialist nurse visits*                                | 0%      | 0%   | 3%                  | 0%                   | 10%               | 0%                      | 0%                 | 0%         | 7%             | 1%             | 0%     | 1%          | 1%         |
| Podiatrist visits                                       | 1%      | 0%   | 3%                  | 33%                  | 17%               | 0%                      | 0%                 | 1%         | 7%             | 1%             | <1%    | 0%          | 1%         |
| Day Cases                                               | 1%      | 0%   | 0%                  | 0%                   | 0%                | 0%                      | 0%                 | 0%         | 0%             | 1%             | 0%     | <1%         | <1%        |

**Table 6: Annual amount of NHS resource use attributable to managing 3.8 million patients with a wound (thousands).** \*Includes tissue viability nurses and diabetic nurse specialists.

|                                                     | Abscess | Burn    | Diabetic foot ulcer | Leg ulcer (arterial) | Leg ulcer (mixed) | Leg ulcer (unspecified) | Leg ulcer (venous) | Open wound | Pressure ulcer | Surgical wound | Trauma  | Unspecified | All wounds |
|-----------------------------------------------------|---------|---------|---------------------|----------------------|-------------------|-------------------------|--------------------|------------|----------------|----------------|---------|-------------|------------|
| District/community nurse visits                     | 1069.31 | 2124.01 | 10443.18            | 895.38               | 4411.41           | 6093.17                 | 17459.02           | 797.34     | 5789.24        | 2791.44        | 234.97  | 2305.39     | 54413.86   |
| Healthcare assistant visits                         | 1111.38 | 1283.91 | 10641.73            | 1020.07              | 4671.18           | 6946.81                 | 17619.78           | 804.15     | 3839.82        | 3047.33        | 238.16  | 2423.08     | 53647.40   |
| Practice nurse visits                               | 745.32  | 484.97  | 3428.04             | 187.60               | 1938.34           | 1278.84                 | 14461.10           | 545.16     | 1128.81        | 1217.10        | 290.62  | 2356.74     | 28062.63   |
| GP office visits                                    | 632.13  | 382.27  | 2436.59             | 115.97               | 1173.09           | 1102.64                 | 9855.13            | 497.20     | 1196.00        | 983.00         | 292.53  | 1424.03     | 20090.58   |
| Dressings                                           | 7383.46 | 5580.89 | 51475.28            | 4007.17              | 19817.92          | 26030.08                | 79863.80           | 6759.11    | 9467.04        | 27172.85       | 4028.25 | 22913.59    | 264499.43  |
| Compression bandaging/hosiery                       | 160.32  | 62.52   | 588.14              | 0.00                 | 1691.43           | 258.85                  | 27259.29           | 239.70     | 0.00           | 260.19         | 0.00    | 407.91      | 30928.35   |
| Prescribed medication                               | 827.59  | 235.79  | 2948.13             | 242.17               | 1473.18           | 1787.04                 | 5498.12            | 641.18     | 1760.41        | 922.26         | 177.91  | 1359.55     | 17873.33   |
| Hospital outpatient visits with a nurse             | 171.46  | 171.49  | 583.20              | 20.47                | 709.31            | 190.11                  | 3672.33            | 43.82      | 0.00           | 286.86         | 18.26   | 600.07      | 6467.37    |
| Accident & emergency attendances                    | 57.15   | 46.44   | 150.74              | 10.23                | 47.74             | 19.01                   | 248.97             | 30.40      | 40.32          | 57.93          | 13.23   | 35.83       | 758.00     |
| Hospital admissions without surgery                 | 24.01   | 17.86   | 19.77               | 0.00                 | 3.41              | 19.01                   | 62.24              | 33.98      | 26.88          | 60.74          | 23.30   | 78.81       | 370.01     |
| Hospital outpatient visits with a physician/surgeon | 18.29   | 0.00    | 61.78               | 6.82                 | 10.23             | 28.52                   | 41.50              | 14.31      | 40.32          | 40.18          | 18.26   | 5.37        | 285.57     |
| GP home visits                                      | 5.72    | 7.15    | 14.83               | 0.00                 | 17.05             | 0.00                    | 62.24              | 5.37       | 40.32          | 11.21          | 1.89    | 24.18       | 189.95     |
| Diagnostic tests                                    | 1.14    | 3.57    | 17.30               | 0.00                 | 30.69             | 47.53                   | 0.00               | 3.58       | 0.00           | 14.02          | 2.83    | 23.29       | 143.95     |
| Ambulance services                                  | 2.29    | 0.00    | 9.89                | 0.00                 | 3.41              | 0.00                    | 41.50              | 0.00       | 0.00           | 4.67           | 0.00    | 5.37        | 67.12      |
| Hospital admissions with surgery                    | 4.57    | 3.57    | 4.94                | 0.00                 | 0.00              | 0.00                    | 0.00               | 0.00       | 0.00           | 34.57          | 3.46    | 0.00        | 51.12      |
| Specialist nurse visits*                            | 0.00    | 0.00    | 17.30               | 0.00                 | 10.23             | 0.00                    | 0.00               | 0.00       | 13.44          | 0.93           | 0.00    | 3.74        | 45.64      |
| Podiatrist visits                                   | 2.29    | 0.00    | 9.89                | 13.64                | 17.05             | 0.00                    | 0.00               | 0.89       | 13.44          | 1.87           | 0.32    | 0.00        | 59.38      |
| Day Cases                                           | 1.14    | 0.00    | 0.00                | 0.00                 | 0.00              | 0.00                    | 0.00               | 0.00       | 0.00           | 1.87           | 0.00    | 0.90        | 3.91       |

**Table 7: Use of Doppler in patients with an ulcer of the lower limb to measure ankle brachial pressure index (ABPI).**

| Ulcer type            | Percentage who had a Doppler | Percentage who did not have a Doppler | Percentage of these who were prescribed a compression bandage/hosiery |
|-----------------------|------------------------------|---------------------------------------|-----------------------------------------------------------------------|
| Venous leg ulcer      | 59%                          |                                       | 88%                                                                   |
|                       |                              | 41%                                   | 99%                                                                   |
| Arterial leg ulcer    | 22%                          |                                       | 0%                                                                    |
|                       |                              | 78%                                   | 0%                                                                    |
| Mixed                 | 27%                          |                                       | 100%                                                                  |
| Leg ulcer             |                              | 73%                                   | 100%                                                                  |
| Unspecified leg ulcer | 0%                           |                                       | 0%                                                                    |
|                       |                              | 100%                                  | 26%                                                                   |
| Diabetic foot ulcer   | 8%                           |                                       | 50%                                                                   |
|                       |                              | 92%                                   | 12%                                                                   |
| All lower limb ulcers | 15%                          |                                       | 75%                                                                   |
|                       |                              | 85%                                   | 29%                                                                   |



**Table 8: Annual cost of NHS resource use attributable to managing 3.8 million patients with a wound (£ million at 2017/18 prices).**

Percentage of total cost in parentheses. \*Includes tissue viability nurses and diabetic nurse specialists. \*\* Based on 100 bootstrapped samples.

|                                                     | Abscess        | Burn           | Diabetic foot ulcer | Leg ulcer (arterial) | Leg ulcer (mixed) | Leg ulcer (unspecified) | Leg ulcer (venous) | Open wound     | Pressure ulcer | Surgical wound | Trauma        | Unspecified    | Total                   |
|-----------------------------------------------------|----------------|----------------|---------------------|----------------------|-------------------|-------------------------|--------------------|----------------|----------------|----------------|---------------|----------------|-------------------------|
| District/community nurse visits                     | £48.12         | £95.58         | £469.94             | £40.29               | £198.51           | £274.19                 | £785.66            | £35.88         | £260.52        | £125.61        | £10.57        | £103.74        | £2,448.61 (29%)         |
| GP office visits                                    | £46.78         | £28.29         | £180.31             | £8.58                | £86.81            | £81.60                  | £729.28            | £36.79         | £88.50         | £72.74         | £21.65        | £105.38        | £1,486.71 (18%)         |
| Healthcare assistant visits                         | £28.90         | £33.38         | £276.69             | £26.52               | £121.45           | £180.62                 | £458.11            | £20.91         | £99.84         | £79.23         | £6.19         | £63.00         | £1,394.84 (17%)         |
| Hospital admissions without surgery                 | £30.25         | £22.51         | £24.91              | £0.00                | £11.06            | £61.67                  | £201.92            | £42.82         | £33.86         | £76.53         | £29.36        | £99.31         | £634.20 (8%)            |
| Hospital outpatient visits with a nurse             | £16.65         | £16.66         | £56.65              | £1.99                | £68.90            | £18.47                  | £356.69            | £4.26          | £0.00          | £27.86         | £1.77         | £58.28         | £628.18 (8%)            |
| Practice nurse visits                               | £15.65         | £10.18         | £71.99              | £3.94                | £40.71            | £26.86                  | £303.68            | £11.45         | £23.71         | £25.56         | £6.10         | £49.49         | £589.32 (7%)            |
| Wound care products                                 | £10.81         | £12.65         | £92.48              | £5.80                | £38.14            | £39.24                  | £225.10            | £10.68         | £19.05         | £33.57         | £5.50         | £38.36         | £531.38 (6%)            |
| Prescribed medication                               | £12.90         | £3.68          | £45.55              | £3.74                | £22.67            | £27.76                  | £84.36             | £10.00         | £27.09         | £14.30         | £2.79         | £20.90         | £275.74 (3%)            |
| Hospital admissions with surgery                    | £9.67          | £13.38         | £20.69              | £0.00                | £0.00             | £0.00                   | £0.00              | £0.00          | £0.00          | £73.12         | £7.33         | £0.00          | £124.19 (1%)            |
| Accident & emergency attendances                    | £9.16          | £7.44          | £24.15              | £1.64                | £7.65             | £3.05                   | £39.89             | £4.87          | £6.46          | £9.28          | £2.12         | £5.74          | £121.45 (1%)            |
| Hospital outpatient visits with a physician/surgeon | £2.44          | £0.00          | £8.23               | £0.91                | £1.36             | £3.80                   | £5.53              | £1.91          | £5.37          | £5.35          | £2.43         | £0.72          | £38.05 (<1%)            |
| GP home visits                                      | £0.69          | £0.87          | £1.80               | £0.00                | £2.07             | £0.00                   | £7.56              | £0.65          | £4.90          | £1.36          | £0.23         | £2.94          | £23.07 (<1%)            |
| Ambulance services                                  | £0.35          | £0.00          | £1.49               | £0.00                | £0.52             | £0.00                   | £6.27              | £0.00          | £0.00          | £0.71          | £0.00         | £0.81          | £10.15 (<1%)            |
| Podiatrist visits                                   | £0.31          | £0.00          | £1.34               | £1.85                | £2.31             | £0.00                   | £0.00              | £0.12          | £1.82          | £0.25          | £0.04         | £0.00          | £8.04 (<1%)             |
| Day Cases                                           | £0.84          | £0.00          | £0.00               | £0.00                | £0.00             | £0.00                   | £0.00              | £0.00          | £0.00          | £1.37          | £0.00         | £0.66          | £2.87 (<1%)             |
| Specialist nurse visits*                            | £0.00          | £0.00          | £1.11               | £0.00                | £0.66             | £0.00                   | £0.00              | £0.00          | £0.86          | £0.06          | £0.00         | £0.24          | £2.93 (<1%)             |
| Diagnostic tests                                    | £0.00          | £0.01          | £0.03               | £0.00                | £0.06             | £0.09                   | £0.00              | £0.01          | £0.00          | £0.03          | £0.01         | £0.04          | £0.28 (<1%)             |
| <b>TOTAL COST</b>                                   | <b>£233.52</b> | <b>£244.63</b> | <b>£1,277.36</b>    | <b>£95.26</b>        | <b>£602.88</b>    | <b>£717.35</b>          | <b>£3,204.05</b>   | <b>£180.35</b> | <b>£571.98</b> | <b>£546.93</b> | <b>£96.09</b> | <b>£549.61</b> | <b>£8,320.01 (100%)</b> |
| 95% confidence limits                               | £233.17;       | £233.97;       | £1,250.56;          | £86.78;              | £563.53;          | £704.66;                | £2,973.68;         | £175.64;       | £501.67;       | £540.69;       | £93.10;       | £539.47;       | £7,896.93;              |
| around the total cost**                             | £241.31        | £253.68        | £1,292.10           | £97.85               | £594.45           | £740.45                 | £3,261.84          | £182.46        | £577.57        | £555.76        | £97.87        | £571.17        | £8,466.51               |

**Table 9: Annual amount and corresponding cost (at 2017/18 prices) of NHS resource use attributable to managing 3.8 million patients with a wound, stratified by healing.** \*Includes tissue viability nurses and diabetic nurse specialists.

|                                                                             | Annual number (thousand) |           |                                           | Annual cost of wounds (£ million) |           |                                            |
|-----------------------------------------------------------------------------|--------------------------|-----------|-------------------------------------------|-----------------------------------|-----------|--------------------------------------------|
|                                                                             | Healed                   | Unhealed  | Percentage difference in resource use (%) | Healed                            | Unhealed  | Percentage difference in resource cost (%) |
| Number of patients with a wound                                             | 2,677.00                 | 1,125.00  |                                           |                                   |           |                                            |
| Ambulance services                                                          | 4.51                     | 62.61     | 1288%                                     | £0.68                             | £9.47     | 1293%                                      |
| Hospital outpatient visits                                                  | 1,286.86                 | 5,466.09  | 325%                                      | £130.85                           | £535.38   | 309%                                       |
| Practice nurse visits                                                       | 7,430.80                 | 20,631.83 | 178%                                      | £156.05                           | £433.27   | 178%                                       |
| GP visits                                                                   | 5,460.16                 | 14,820.36 | 171%                                      | £407.22                           | £1,102.56 | 171%                                       |
| Podiatrist visits                                                           | 16.11                    | 43.27     | 169%                                      | £2.18                             | £5.86     | 169%                                       |
| Prescribed medication                                                       | 5,593.33                 | 12,280.00 | 120%                                      | £86.72                            | £189.02   | 118%                                       |
| Accident & Emergency attendances                                            | 238.34                   | 519.66    | 118%                                      | £38.19                            | £83.26    | 118%                                       |
| District/community nurse visits                                             | 18,342.87                | 36,070.99 | 97%                                       | £825.59                           | £1,623.02 | 97%                                        |
| Wound care products (dressings/bandages/hosiery/creams/ointments/tapes etc) |                          |           |                                           | £181.06                           | £350.32   | 93%                                        |
| Healthcare assistant visits                                                 | 18,816.65                | 34,830.75 | 85%                                       | £489.23                           | £905.61   | 85%                                        |
| Specialist nurse visits*                                                    | 21.12                    | 24.52     | 16%                                       | £1.35                             | £1.58     | 17%                                        |
| Hospital admissions & day cases                                             | 286.73                   | 138.31    | -52%                                      | £427.89                           | £333.37   | -22%                                       |
| Diagnostic tests                                                            | 86.89                    | 57.06     | -34%                                      | £0.19                             | £0.09     | -53%                                       |
| TOTAL                                                                       |                          |           |                                           | £2,747.20                         | £5,572.81 | 103%                                       |

**Table 10: Total annual NHS cost (at 2017/18 prices) of wound care attributable to managing 3.8 million patients with a wound and cost per patient, stratified by healing.**

|                         | Total NHS Cost for all patients (£ million) |                 | Mean annual NHS cost per patient |                |
|-------------------------|---------------------------------------------|-----------------|----------------------------------|----------------|
|                         | Healed wounds                               | Unhealed wounds | Healed wounds                    | Unhealed wound |
| Abscess                 | 152.12                                      | 81.40           | £604.88                          | £1,977.94      |
| Burn                    | 140.23                                      | 104.40          | £754.81                          | £2,922.16      |
| Diabetic foot ulcer     | 490.11                                      | 787.25          | £2,874.36                        | £5,056.71      |
| Leg ulcer (arterial)    | 53.70                                       | 41.56           | £2,623.83                        | £4,061.31      |
| Leg ulcer (mixed)       | 143.77                                      | 459.11          | £4,684.15                        | £6,411.01      |
| Leg ulcer (unspecified) | 379.58                                      | 337.77          | £1,901.79                        | £2,089.98      |
| Leg ulcer (venous)      | 422.56                                      | 2781.49         | £2,036.67                        | £7,886.05      |
| Open wound              | 127.51                                      | 52.84           | £421.83                          | £1,515.03      |
| Pressure ulcer          | 90.44                                       | 481.54          | £747.75                          | £5,972.28      |
| Surgical wound          | 389.92                                      | 157.01          | £884.11                          | £2,024.49      |
| Trauma                  | 83.78                                       | 12.31           | £358.09                          | £831.63        |
| Unspecified             | 273.48                                      | 276.13          | £533.82                          | £3,146.03      |

| Read Code | Description                                           |
|-----------|-------------------------------------------------------|
| 2924      | O/E - trophic skin ulceration                         |
| 2924.00   | O/E - trophic skin ulceration                         |
| 3511      | Surgical biopsy taken                                 |
| 3511.00   | Surgical biopsy taken                                 |
| 8343.00   | Immobilisation of wound                               |
| 14F3.00   | H/O: chronic skin ulcer                               |
| 14F4.00   | H/O: Admission in last year for diabetes foot problem |
| 14F5.00   | H/O: venous leg ulcer                                 |
| 14F6.00   | H/O: foot ulcer                                       |
| 14F7.00   | H/O: arterial lower limb ulcer                        |
| 22L..00   | O/E - wound healing                                   |
| 22L1.00   | O/E - Wound healed                                    |
| 22L2.00   | O/E - Wound healing well                              |
| 22L3.00   | O/E - Wound healing badly                             |
| 22L3.11   | O/E wound healing delayed                             |
| 22L4.00   | O/E - Wound infected                                  |
| 22L5.00   | O/E - protruding suture                               |
| 22L6.00   | O/E - wound necrotic                                  |
| 22Q..00   | Wound observation                                     |
| 22Q0.00   | Length of wound                                       |
| 22Q1.00   | Width of wound                                        |
| 22Q3.00   | Wound dirty                                           |
| 22Q4.00   | Depth of wound                                        |
| 22Q6.00   | Wound discharge                                       |
| 22Q8.00   | Critical colonisation of wound                        |
| 22Q9.00   | Traumatic wound                                       |
| 22QA.00   | Surgical wound                                        |
| 22QB.00   | Fungating wound                                       |
| 26B8.00   | O/E - ulcerated breast lesion                         |
| 26B8.11   | O/E - ulcer on breast                                 |
| 2Fb..00   | Granulation of tissue                                 |
| 2FF..00   | O/E - skin ulcer                                      |
| 2FF1.00   | O/E - no skin ulcer                                   |
| 2FF2.00   | O/E - skin ulcer present                              |
| 2FF3.00   | O/E - depth of ulcer                                  |
| 2FFZ.00   | O/E - skin ulcer NOS                                  |
| 2FG7.00   | O/E - healed burn scar                                |
| 2Fl..00   | O/E - sinus in skin                                   |
| 2FI2.00   | O/E -skin sinus-post operation                        |
| 2FI3.00   | O/E - skin sinus -after injury                        |
| 2FI4.00   | O/E - suppuration skin sinus                          |
| 2FIZ.00   | O/E - skin sinus NOS                                  |
| 2G48.00   | O/E - ankle ulcer                                     |
| 2G4E.00   | Healed leg ulcer                                      |
| 2G54.00   | O/E - Right foot ulcer                                |
| 2G55.00   | O/E - Left foot ulcer                                 |
| 2G5H.00   | O/E - Right diabetic foot - ulcerated                 |
| 2G5L.00   | O/E - Left diabetic foot - ulcerated                  |
| 2G5Q.00   | O/E - No left foot ulcer                              |

|    |         |                                                              |
|----|---------|--------------------------------------------------------------|
| 1  |         |                                                              |
| 2  | 2G5R.00 | O/E - No right foot ulcer                                    |
| 3  | 2G5S.00 | O/E - right healed foot ulcer                                |
| 4  | 2G5T.00 | O/E - left healed foot ulcer                                 |
| 5  | 2G5V.00 | O/E - right chronic diabetic foot ulcer                      |
| 6  | 2G5W.00 | O/E - left chronic diabetic foot ulcer                       |
| 7  |         |                                                              |
| 8  | 2G63.00 | Ischaemic toe                                                |
| 9  | 2G64.00 | O/E - infected toe                                           |
| 10 | 2I16.00 | O/E - gangrene                                               |
| 11 | 38C4.00 | Leg ulcer assessment                                         |
| 12 | 38N..00 | Wound assessment                                             |
| 13 | 38Qi.00 | SINBAD (site,isch,neuro,bact inf,depth) wound classification |
| 14 | 39C0.00 | Pressure sore                                                |
| 15 | 39C1.00 | Superficial pressure sore                                    |
| 16 | 39C2.00 | Deep pressure sore                                           |
| 17 | 39C3.00 | Pressure sore -deep + superfic                               |
| 18 | 39C4.00 | Waterlow pressure sore risk score                            |
| 19 | 39C4200 | Waterlow major surgery/trauma score                          |
| 20 | 39C5.00 | Medley pressure sore risk score                              |
| 21 | 39C6.00 | Maelor pressure ulcer risk assessment score                  |
| 22 | 39C6.11 | Maelor score                                                 |
| 23 | 39C7.00 | EPUAP (European pressure ulcer advisory panel) grade 1 ulcer |
| 24 | 39C8.00 | EPUAP (European pressure ulcer advisory panel) grade 2 ulcer |
| 25 | 39C9.00 | EPUAP (European pressure ulcer advisory panel) grade 3 ulcer |
| 26 | 39CA.00 | EPUAP (European pressure ulcer advisory panel) grade 4 ulcer |
| 27 | 4I1F.00 | Wound microscopy, culture and sensitivities                  |
| 28 | 4I2D.00 | Wound exudate sample                                         |
| 29 | 4I2D.11 | Wound swab                                                   |
| 30 | 4I2D000 | Wound swab culture positive                                  |
| 31 | 4I2D100 | Wound swab culture negative                                  |
| 32 | 4JG3.00 | Skin ulcer swab taken                                        |
| 33 | 4JG4.00 | Skin wound swab taken                                        |
| 34 | 58C4.00 | Photography of wound                                         |
| 35 | 6AD1.00 | Wound repair review                                          |
| 36 | 7F23400 | Repair of episiotomy                                         |
| 37 | 7F23y00 | Other specified immediate repair of obstetric laceration     |
| 38 | 7F24.00 | Other obstetric operations                                   |
| 39 | 7F24y00 | Other specified other obstetric operation                    |
| 40 | 7F24z00 | Other obstetric operation NOS                                |
| 41 | 7G06.00 | Curettage of lesion of skin                                  |
| 42 | 7G06.11 | Curettage of lesion of skin or subcutaneous tissue           |
| 43 | 7G06.12 | Curettage of lesion of skin including head and neck          |
| 44 | 7G06000 | Curettage and cauterisation of lesion of skin head or neck   |
| 45 | 7G06100 | Curettage and cauterisation of lesion of skin NEC            |
| 46 | 7G06111 | Curettage and cauterisation of skin wart NEC                 |
| 47 | 7G06200 | Curettage of lesion of skin of head or neck NEC              |
| 48 | 7G06300 | Curettage of sinus NEC                                       |
| 49 | 7G06400 | Curettage of wound NEC                                       |
| 50 | 7G06y00 | Other specified curettage of lesion of skin                  |
| 51 | 7G06z00 | Curettage of lesion of skin NOS                              |
| 52 | 7G2C000 | Toilet or clean burnt skin of head or neck                   |
| 53 |         |                                                              |
| 54 |         |                                                              |
| 55 |         |                                                              |
| 56 |         |                                                              |
| 57 |         |                                                              |
| 58 |         |                                                              |
| 59 |         |                                                              |
| 60 |         |                                                              |

|    |         |                                                              |
|----|---------|--------------------------------------------------------------|
| 1  |         |                                                              |
| 2  | 7G2C100 | Toilet or clean burnt skin NEC                               |
| 3  | 7G2C200 | Debridement of burnt skin of head and neck                   |
| 4  | 7G2C300 | Debridement of burnt skin NEC                                |
| 5  | 7G2C400 | Toilet to burnt skin of head or neck NEC                     |
| 6  | 7G2C500 | Tangent excision of burnt skin of head or neck               |
| 7  | 7G2C600 | Tangent excision of burnt skin NEC                           |
| 8  | 7G2CE00 | Removal of slough from burnt skin NEC                        |
| 9  | 7G2CE11 | Escharotomy of burnt skin NEC                                |
| 10 | 7G2CF00 | Cleansing and sterilisation of burnt skin of head or neck    |
| 11 | 7G2CG00 | Dress burnt skin head or neck us vacuum assisted clos device |
| 12 | 7G2CH00 | Cleansing and sterilisation of burnt skin NEC                |
| 13 | 7G2CJ00 | Dressing burnt skin using vacuum assisted closure device NEC |
| 14 | 7G2Cy00 | Other specified toilet to burnt skin                         |
| 15 | 7G2Cz00 | Toilet to burnt skin NOS                                     |
| 16 | 7G2D.00 | Other skin toilet                                            |
| 17 | 7G2D000 | Debridement of skin NEC                                      |
| 18 | 7G2D011 | Debridement of wound of skin NEC                             |
| 19 | 7G2D100 | Debridement of skin of head or neck NEC                      |
| 20 | 7G2D200 | Removal of slough from skin NEC                              |
| 21 | 7G2D300 | Removal of slough from skin of head or neck NEC              |
| 22 | 7G2D400 | Toilet to skin of head or neck NEC                           |
| 23 | 7G2D500 | Cleaning of skin wound NEC                                   |
| 24 | 7G2D600 | Cleaning of skin wound of head or neck                       |
| 25 | 7G2D700 | Cleansing and sterilisation of skin of head or neck NEC      |
| 26 | 7G2D800 | Cleansing and sterilisation of skin NEC                      |
| 27 | 7G2D900 | Dres skin head or neck us vacuum assisted closure device NEC |
| 28 | 7G2DA00 | Dressing of skin using vacuum assisted closure device NEC    |
| 29 | 7G2DB00 | Removal of slough from skin using pressurised fluid jet      |
| 30 | 7G2Dy00 | Other specified toilet to skin                               |
| 31 | 7G2Dz00 | Other toilet to skin NOS                                     |
| 32 | 7G2E.00 | Dressing of skin or wound                                    |
| 33 | 7G2E.11 | Dressing of skin                                             |
| 34 | 7G2E000 | Dressing of burnt skin of head or neck                       |
| 35 | 7G2E100 | Dressing of burnt skin NEC                                   |
| 36 | 7G2E200 | Dressing of skin of head or neck NEC                         |
| 37 | 7G2E300 | Dressing of skin NEC                                         |
| 38 | 7G2E400 | Dressing of skin of head or neck NEC                         |
| 39 | 7G2E500 | Dressing of skin ulcer NEC                                   |
| 40 | 7G2E600 | Attention to dressing of burn of head or neck                |
| 41 | 7G2E700 | Attention to dressing of burnt skin NEC                      |
| 42 | 7G2E800 | Attention to dressing of skin of head or neck NEC            |
| 43 | 7G2E900 | Attention to dressing of skin NEC                            |
| 44 | 7G2EA00 | Two layer compression bandage for skin ulcer                 |
| 45 | 7G2EB00 | Four layer compression bandaging for skin ulcer              |
| 46 | 7G2EC00 | Three layer compression bandage for skin ulcer               |
| 47 | 7G2Ey00 | Other specified dressing of skin                             |
| 48 | 7G2Ez00 | Dressing of skin NOS                                         |
| 49 | 7G2G000 | Dermabrasion of skin of head or neck                         |
| 50 | 7G2G100 | Dermabrasion of skin NEC                                     |
| 51 | 7G2G400 | Refashioning of scar                                         |
| 52 |         |                                                              |
| 53 |         |                                                              |
| 54 |         |                                                              |
| 55 |         |                                                              |
| 56 |         |                                                              |
| 57 |         |                                                              |
| 58 |         |                                                              |
| 59 |         |                                                              |
| 60 |         |                                                              |

|    |         |                                                             |
|----|---------|-------------------------------------------------------------|
| 1  |         |                                                             |
| 2  | 7P23200 | Delivery of rehabilitation for burns                        |
| 3  | 81H..00 | Dressing of wound                                           |
| 4  | 81H1.00 | Dressing of ulcer                                           |
| 5  | 81H2.00 | Dressing of burn                                            |
| 6  | 81H3.00 | Attention to dressing of skin                               |
| 7  | 81H4.00 | Checking dressing of skin                                   |
| 8  | 81H5.00 | Change of dressing                                          |
| 9  | 81Hy.00 | Other wound dressing                                        |
| 10 | 81HZ.00 | Wound dressing NOS                                          |
| 11 | 8BC7.00 | Glueing of wound                                            |
| 12 | 8BN..00 | Treatment of wound with maggots                             |
| 13 | 8C1L.00 | Wound care                                                  |
| 14 | 8C1M.00 | Post-operative wound care                                   |
| 15 | 8C1M.11 | Post-surgical wound care                                    |
| 16 | 8C1Q.00 | Compression hosiery procedure                               |
| 17 | 8C22.00 | Oxygenation of slough                                       |
| 18 | 8C6..00 | Wound dressing requested by accident and emergency service  |
| 19 | 8C7..00 | Suture removal requested by accident and emergency service  |
| 20 | 8CA4T00 | Dietary education for wound healing                         |
| 21 | 8CA4T11 | Dietary advice for wound healing                            |
| 22 | 8Cd9.00 | Advice given about wound care                               |
| 23 | 8CK..00 | Skin care                                                   |
| 24 | 8CMT.00 | Leg ulcer care pathway                                      |
| 25 | 8CS3.00 | Agreeing on leg ulcer treatment plan                        |
| 26 | 8CT1.00 | Leg ulcer compression therapy finished                      |
| 27 | 8CV2.00 | Leg ulcer compression therapy started                       |
| 28 | 8H15.00 | Admit to burns unit                                         |
| 29 | 8H5E.00 | Burns referral                                              |
| 30 | 8HIV.00 | Referral for complex wound care                             |
| 31 | 8HTh.00 | Referral to leg ulcer clinic                                |
| 32 | 9kd..00 | Complex wound care - enhanced services administration       |
| 33 | 9ks..00 | Complex skin ulcer care enhanced services administration    |
| 34 | 9kY..00 | Review of wound repair - enhanced services administration   |
| 35 | 9kY..11 | Review of wound repair                                      |
| 36 | 9N0t.00 | Seen in primary care leg ulcer clinic                       |
| 37 | 9N0z.00 | Seen in burns clinic                                        |
| 38 | 9N2m.00 | Seen by tissue viability nurse specialist                   |
| 39 | 9N7L.00 | Postop wound management gen secondary care done by practice |
| 40 | 9NM5.00 | Attending leg ulcer clinic                                  |
| 41 | A056.00 | Amoebic skin ulceration                                     |
| 42 | A170.00 | Tuberculosis of skin and subcutaneous tissue                |
| 43 | A170z00 | Tuberculosis of skin and subcutaneous tissue NOS            |
| 44 | A3A0500 | Gas gangrene                                                |
| 45 | A3A0600 | Gas gangrene-neck                                           |
| 46 | A3A0700 | Gas gangrene-back                                           |
| 47 | A3A0800 | Gas gangrene-shoulder                                       |
| 48 | A3A0900 | Gas gangrene-arm                                            |
| 49 | A3A0A00 | Gas gangrene-forearm                                        |
| 50 | A3A0B00 | Gas gangrene-hand                                           |
| 51 | A3A0C00 | Gas gangrene-pelvis                                         |
| 52 |         |                                                             |
| 53 |         |                                                             |
| 54 |         |                                                             |
| 55 |         |                                                             |
| 56 |         |                                                             |
| 57 |         |                                                             |
| 58 |         |                                                             |
| 59 |         |                                                             |
| 60 |         |                                                             |



|    |         |                                                       |
|----|---------|-------------------------------------------------------|
| 1  |         |                                                       |
| 2  | A3A0D00 | Gas gangrene-thigh                                    |
| 3  | A3A0E00 | Gas gangrene-leg                                      |
| 4  | A3A0F00 | Gas gangrene-foot                                     |
| 5  | A3A0z00 | Gas gangrene caused by organism NOS                   |
| 6  | A851000 | Aleppo boil                                           |
| 7  | A851100 | Baghdad boil                                          |
| 8  | A851200 | Delhi boil                                            |
| 9  |         |                                                       |
| 10 | A851z00 | Urban cutaneous leishmaniasis NOS                     |
| 11 | A852.00 | Asian desert cutaneous leishmaniasis                  |
| 12 | A853.00 | Ethiopian cutaneous leishmaniasis                     |
| 13 | A854.00 | American cutaneous leishmaniasis                      |
| 14 | A854.11 | Chiclero ulcer                                        |
| 15 | A855.00 | American mucocutaneous leishmaniasis                  |
| 16 | A85z.00 | Leishmaniasis NOS                                     |
| 17 | A86..00 | Trypanosomiasis                                       |
| 18 |         |                                                       |
| 19 | AD40000 | Cutaneous myiasis                                     |
| 20 | AD40100 | Wound myiasis                                         |
| 21 |         |                                                       |
| 22 | C107.11 | Diabetes mellitus with gangrene                       |
| 23 | C107.12 | Diabetes with gangrene                                |
| 24 | C107200 | Diabetes mellitus, adult with gangrene                |
| 25 | C108500 | Insulin dependent diabetes mellitus with ulcer        |
| 26 | C108511 | Type I diabetes mellitus with ulcer                   |
| 27 | C108512 | Type 1 diabetes mellitus with ulcer                   |
| 28 |         |                                                       |
| 29 | C108600 | Insulin dependent diabetes mellitus with gangrene     |
| 30 | C108611 | Type I diabetes mellitus with gangrene                |
| 31 | C108612 | Type 1 diabetes mellitus with gangrene                |
| 32 | C109400 | Non-insulin dependent diabetes mellitus with ulcer    |
| 33 | C109411 | Type II diabetes mellitus with ulcer                  |
| 34 | C109412 | Type 2 diabetes mellitus with ulcer                   |
| 35 |         |                                                       |
| 36 | C109500 | Non-insulin dependent diabetes mellitus with gangrene |
| 37 | C109511 | Type II diabetes mellitus with gangrene               |
| 38 | C109512 | Type 2 diabetes mellitus with gangrene                |
| 39 |         |                                                       |
| 40 | C10E500 | Type 1 diabetes mellitus with ulcer                   |
| 41 | C10E511 | Type I diabetes mellitus with ulcer                   |
| 42 | C10E512 | Insulin dependent diabetes mellitus with ulcer        |
| 43 |         |                                                       |
| 44 | C10E600 | Type 1 diabetes mellitus with gangrene                |
| 45 | C10E611 | Type I diabetes mellitus with gangrene                |
| 46 | C10E612 | Insulin dependent diabetes mellitus with gangrene     |
| 47 |         |                                                       |
| 48 | C10F400 | Type 2 diabetes mellitus with ulcer                   |
| 49 | C10F411 | Type II diabetes mellitus with ulcer                  |
| 50 | C10F500 | Type 2 diabetes mellitus with gangrene                |
| 51 | C10F511 | Type II diabetes mellitus with gangrene               |
| 52 |         |                                                       |
| 53 | F506.00 | Abscess of external ear                               |
| 54 | G732.00 | Peripheral gangrene                                   |
| 55 | G732000 | Gangrene of toe                                       |
| 56 | G732100 | Gangrene of foot                                      |
| 57 | G732200 | Gangrene of finger                                    |
| 58 | G732300 | Gangrene of thumb                                     |
| 59 | G732400 | Gangrene of hand                                      |
| 60 | G830.00 | Varicose veins of the leg with ulcer                  |

|    |         |                                                              |
|----|---------|--------------------------------------------------------------|
| 1  |         |                                                              |
| 2  | G832.00 | Varicose veins of the leg with ulcer and eczema              |
| 3  | G835.00 | Infected varicose ulcer                                      |
| 4  | G837.00 | Venous ulcer of leg                                          |
| 5  | J085000 | Abscess of lip                                               |
| 6  | J085800 | Lip ulcer                                                    |
| 7  | J54..00 | Abscess of anal and rectal regions                           |
| 8  | J54..12 | Rectal abscess                                               |
| 9  | J540.00 | Perianal abscess                                             |
| 10 | J540.11 | Perianal cellulitis                                          |
| 11 | J541.00 | Ischiorectal abscess                                         |
| 12 | J542.00 | Submucous ano-rectal abscess                                 |
| 13 | J543.00 | Pelvi-rectal abscess                                         |
| 14 | J544.00 | Ano-rectal fissure abscess                                   |
| 15 | J545.00 | Intrasphincteric abscess                                     |
| 16 | J546.00 | Rectal abscess                                               |
| 17 | J54z.00 | Ano-rectal abscess NOS                                       |
| 18 | K272000 | Penile abscess                                               |
| 19 | K272100 | Penile boil                                                  |
| 20 | K272200 | Penile carbuncle                                             |
| 21 | K272300 | Cellulitis of penis                                          |
| 22 | K27y500 | Chronic ulcer of penis                                       |
| 23 | K284600 | Fournier's gangrene of scrotum                               |
| 24 | K424000 | Abscess of vulva                                             |
| 25 | K424011 | Abscess of labia                                             |
| 26 | K424100 | Carbuncle of vulva                                           |
| 27 | K424111 | Boil of vulva                                                |
| 28 | K424200 | Furuncle of vulva                                            |
| 29 | K424z00 | Other abscess of vulva NOS                                   |
| 30 | K425.00 | Ulceration of vulva                                          |
| 31 | K425000 | Ulceration of vulva unspecified                              |
| 32 | K425100 | Ulceration of vulva in diseases EC                           |
| 33 | K425200 | Ulceration of vulva in Behcet's disease                      |
| 34 | K425z00 | Ulceration of vulva NOS                                      |
| 35 | L394500 | Infection of obstetric surgical wound                        |
| 36 | L441.00 | Caesarean wound disruption                                   |
| 37 | L441000 | Caesarean wound disruption unspecified                       |
| 38 | L441100 | Caesarean wound disruption - delivered with p/n complication |
| 39 | L441200 | Caesarean wound disruption with postnatal complication       |
| 40 | L441z00 | Caesarean wound disruption NOS                               |
| 41 | L442.00 | Obstetric perineal wound disruption                          |
| 42 | L442.11 | Breakdown of perineum                                        |
| 43 | L442.12 | Episiotomy breakdown                                         |
| 44 | L442000 | Obstetric perineal wound disruption unspecified              |
| 45 | L442100 | Obstetric perineal wound disruption - deliv + p/n comp       |
| 46 | L442200 | Obstetric perineal wound disruption with p/n complication    |
| 47 | L442z00 | Obstetric perineal wound disruption NOS                      |
| 48 | L443.00 | Other complication of obstetric surgical wound               |
| 49 | L443.11 | Haematoma - perineal wound                                   |
| 50 | L443.12 | Infection - perineal wound                                   |
| 51 | L443000 | Other complication of obstetric surgical wound unspecified   |
| 52 |         |                                                              |
| 53 |         |                                                              |
| 54 |         |                                                              |
| 55 |         |                                                              |
| 56 |         |                                                              |
| 57 |         |                                                              |
| 58 |         |                                                              |
| 59 |         |                                                              |
| 60 |         |                                                              |

|    |         |                                                              |
|----|---------|--------------------------------------------------------------|
| 1  |         |                                                              |
| 2  | L443100 | Other complication obstetric surg wound -delivered +p/n comp |
| 3  | L443200 | Other complication obstetric surgical wound with p/n comp    |
| 4  | L443z00 | Other complication of obstetric surgical wound NOS           |
| 5  | L45..00 | Obstetric breast infections                                  |
| 6  | L450.00 | Obstetric nipple infection                                   |
| 7  | L450.11 | Abscess of nipple - obstetric                                |
| 8  | L450.12 | Nipple infection - obstetric                                 |
| 9  | L450000 | Obstetric nipple infection unspecified                       |
| 10 | L450100 | Obstetric nipple infection - delivered                       |
| 11 | L450200 | Obstetric nipple infection - delivered with p/n complication |
| 12 | L450300 | Obstetric nipple infection with antenatal complication       |
| 13 | L450400 | Obstetric nipple infection with postnatal complication       |
| 14 | L450z00 | Obstetric nipple infection NOS                               |
| 15 | L451.00 | Obstetric breast abscess                                     |
| 16 | L451.11 | Purulent mastitis - obstetric                                |
| 17 | L451000 | Obstetric breast abscess unspecified                         |
| 18 | L451100 | Obstetric breast abscess - delivered                         |
| 19 | L451200 | Obstetric breast abscess - deliv with postnatal complication |
| 20 | L451300 | Obstetric breast abscess with antenatal complication         |
| 21 | L451400 | Obstetric breast abscess with postnatal complication         |
| 22 | L451z00 | Obstetric breast abscess NOS                                 |
| 23 | Lyu6A00 | [X]Infection of caesarean section wound following delivery   |
| 24 | M....00 | Skin and subcutaneous tissue diseases                        |
| 25 | M0...00 | Skin and subcutaneous tissue infections                      |
| 26 | M00..00 | Carbuncle                                                    |
| 27 | M000.00 | Carbuncle of face                                            |
| 28 | M000000 | Carbuncle of ear                                             |
| 29 | M000100 | Carbuncle of face (excluding eye)                            |
| 30 | M000200 | Carbuncle of nasal septum                                    |
| 31 | M000300 | Carbuncle of temple region                                   |
| 32 | M000z00 | Carbuncle of face NOS                                        |
| 33 | M001.00 | Carbuncle of neck                                            |
| 34 | M002.00 | Carbuncle of trunk                                           |
| 35 | M002000 | Carbuncle of chest wall                                      |
| 36 | M002100 | Carbuncle of breast                                          |
| 37 | M002200 | Carbuncle of back                                            |
| 38 | M002300 | Carbuncle of abdominal wall                                  |
| 39 | M002400 | Carbuncle of umbilicus                                       |
| 40 | M002500 | Carbuncle of flank                                           |
| 41 | M002600 | Carbuncle of groin                                           |
| 42 | M002700 | Carbuncle of perineum                                        |
| 43 | M002z00 | Carbuncle of trunk NOS                                       |
| 44 | M003.00 | Carbuncle of upper arm and forearm                           |
| 45 | M003000 | Carbuncle of shoulder                                        |
| 46 | M003100 | Carbuncle of axilla                                          |
| 47 | M003200 | Carbuncle of upper arm                                       |
| 48 | M003300 | Carbuncle of elbow                                           |
| 49 | M003400 | Carbuncle of forearm                                         |
| 50 | M003z00 | Carbuncle of upper arm and forearm NOS                       |
| 51 | M004.00 | Carbuncle of hand                                            |
| 52 |         |                                                              |
| 53 |         |                                                              |
| 54 |         |                                                              |
| 55 |         |                                                              |
| 56 |         |                                                              |
| 57 |         |                                                              |
| 58 |         |                                                              |
| 59 |         |                                                              |
| 60 |         |                                                              |

|    |         |                                       |
|----|---------|---------------------------------------|
| 1  |         |                                       |
| 2  | M004000 | Carbuncle of wrist                    |
| 3  | M004100 | Carbuncle of thumb                    |
| 4  | M004200 | Carbuncle of finger                   |
| 5  | M004z00 | Carbuncle of hand NOS                 |
| 6  | M005.00 | Carbuncle of buttock                  |
| 7  | M005000 | Carbuncle of anus                     |
| 8  | M005100 | Carbuncle of gluteal region           |
| 9  | M005z00 | Carbuncle of buttock NOS              |
| 10 | M006.00 | Carbuncle of leg (excluding foot)     |
| 11 | M006000 | Carbuncle of hip                      |
| 12 | M006100 | Carbuncle of thigh                    |
| 13 | M006200 | Carbuncle of knee                     |
| 14 | M006300 | Carbuncle of lower leg                |
| 15 | M006400 | Carbuncle of ankle                    |
| 16 | M006z00 | Carbuncle of leg (excluding foot) NOS |
| 17 | M007.00 | Carbuncle of foot                     |
| 18 | M007000 | Carbuncle of foot unspecified         |
| 19 | M007100 | Carbuncle of heel                     |
| 20 | M007200 | Carbuncle of toe                      |
| 21 | M007z00 | Carbuncle of foot NOS                 |
| 22 | M00y.00 | Carbuncle of other specified site     |
| 23 | M00y000 | Carbuncle of head (excluding face)    |
| 24 | M00yz00 | Carbuncle of other specified site NOS |
| 25 | M00z.00 | Carbuncle NOS                         |
| 26 | M01..00 | Furuncle - boil                       |
| 27 | M010.00 | Boil of face                          |
| 28 | M010000 | Boil of ear                           |
| 29 | M010100 | Boil of face (excluding eye)          |
| 30 | M010200 | Boil of nasal septum                  |
| 31 | M010300 | Boil of temple region                 |
| 32 | M010400 | Boil of external nose                 |
| 33 | M010z00 | Boil of face NOS                      |
| 34 | M011.00 | Boil of neck                          |
| 35 | M012.00 | Boil of trunk                         |
| 36 | M012000 | Boil of chest wall                    |
| 37 | M012100 | Boil of breast                        |
| 38 | M012200 | Boil of back                          |
| 39 | M012300 | Boil of abdominal wall                |
| 40 | M012400 | Boil of umbilicus                     |
| 41 | M012500 | Boil of flank                         |
| 42 | M012600 | Boil of groin                         |
| 43 | M012700 | Boil of perineum                      |
| 44 | M012z00 | Boil of trunk NOS                     |
| 45 | M013.00 | Boil of upper arm and forearm         |
| 46 | M013000 | Boil of shoulder                      |
| 47 | M013100 | Boil of axilla                        |
| 48 | M013200 | Boil of upper arm                     |
| 49 | M013300 | Boil of elbow                         |
| 50 | M013400 | Boil of forearm                       |
| 51 | M013z00 | Boil of upper arm and forearm NOS     |
| 52 |         |                                       |
| 53 |         |                                       |
| 54 |         |                                       |
| 55 |         |                                       |
| 56 |         |                                       |
| 57 |         |                                       |
| 58 |         |                                       |
| 59 |         |                                       |
| 60 |         |                                       |

|    |         |                                              |
|----|---------|----------------------------------------------|
| 1  | M014.00 | Boil of hand                                 |
| 2  | M014000 | Boil of wrist                                |
| 3  | M014100 | Boil of thumb                                |
| 4  | M014200 | Boil of finger                               |
| 5  | M014z00 | Boil of hand NOS                             |
| 6  | M015.00 | Boil of buttock                              |
| 7  | M015000 | Boil of anus                                 |
| 8  | M015100 | Boil of gluteal region                       |
| 9  | M015z00 | Boil of buttock NOS                          |
| 10 | M016.00 | Boil of leg (excluding foot)                 |
| 11 | M016000 | Boil of hip                                  |
| 12 | M016100 | Boil of thigh                                |
| 13 | M016200 | Boil of knee                                 |
| 14 | M016300 | Boil of lower leg                            |
| 15 | M016400 | Boil of ankle                                |
| 16 | M016z00 | Boil of leg (excluding foot) NOS             |
| 17 | M017.00 | Boil of foot                                 |
| 18 | M017000 | Boil of foot unspecified                     |
| 19 | M017100 | Boil of heel                                 |
| 20 | M017200 | Boil of toe                                  |
| 21 | M017z00 | Boil of foot NOS                             |
| 22 | M01y.00 | Boil of other specified site                 |
| 23 | M01y000 | Boil of head (excluding face)                |
| 24 | M01yz00 | Boil of other specified site NOS             |
| 25 | M01z.00 | Boil NOS                                     |
| 26 | M01z.11 | Recurrent boils                              |
| 27 | M01z.12 | Boils of multiple sites                      |
| 28 | M01z000 | Multiple boils                               |
| 29 | M02.00  | Cellulitis and abscess of finger and toe     |
| 30 | M020.00 | Cellulitis and abscess of finger             |
| 31 | M020000 | Cellulitis and abscess of finger unspecified |
| 32 | M020100 | Finger pulp abscess                          |
| 33 | M020111 | Felon                                        |
| 34 | M020112 | Whitlow                                      |
| 35 | M020200 | Onychia of finger                            |
| 36 | M020300 | Paronychia of finger                         |
| 37 | M020311 | Perionychia of finger                        |
| 38 | M020400 | Finger web space infection                   |
| 39 | M020500 | Pulp space infection of finger/thumb         |
| 40 | M020z00 | Cellulitis and abscess of finger NOS         |
| 41 | M021.00 | Cellulitis and abscess of toe                |
| 42 | M021000 | Cellulitis and abscess of toe unspecified    |
| 43 | M021100 | Onychia of toe                               |
| 44 | M021200 | Paronychia of toe                            |
| 45 | M021300 | Pulp space infection of toe                  |
| 46 | M021z00 | Cellulitis and abscess of toe NOS            |
| 47 | M021z11 | Perionychia of toe                           |
| 48 | M02z.00 | Cellulitis and abscess of digit NOS          |
| 49 | M02z.11 | Nail infection NOS                           |
| 50 | M02z.12 | Paronychia                                   |

|    |         |                                                             |
|----|---------|-------------------------------------------------------------|
| 1  |         |                                                             |
| 2  | M02z.13 | Infected nailfold                                           |
| 3  | M02z.14 | Nailfold infected                                           |
| 4  | M03..00 | Other cellulitis and abscess                                |
| 5  | M03..11 | Abscess of skin area excluding digits of hand or foot       |
| 6  | M03..12 | Acute lymphangitis of skin excluding digits of hand or foot |
| 7  | M03..13 | Cellulitis of skin area excluding digits of hand or foot    |
| 8  | M030.00 | Cellulitis and abscess of face                              |
| 9  | M030000 | Cellulitis and abscess of cheek (external)                  |
| 10 | M030011 | Cellulitis and abscess of cheek                             |
| 11 | M030100 | Cellulitis and abscess of nose (external)                   |
| 12 | M030111 | Cellulitis and abscess of nose                              |
| 13 | M030200 | Cellulitis and abscess of chin                              |
| 14 | M030300 | Cellulitis and abscess of submandibular region              |
| 15 | M030400 | Cellulitis and abscess of forehead                          |
| 16 | M030500 | Cellulitis and abscess of temple region                     |
| 17 | M030600 | Cellulitis of face                                          |
| 18 | M030z00 | Cellulitis and abscess of face NOS                          |
| 19 | M031.00 | Cellulitis and abscess of neck                              |
| 20 | M031.11 | Cervical abscess                                            |
| 21 | M032.00 | Cellulitis and abscess of trunk                             |
| 22 | M032000 | Cellulitis and abscess of chest wall                        |
| 23 | M032100 | Cellulitis and abscess of breast                            |
| 24 | M032200 | Cellulitis and abscess of back                              |
| 25 | M032300 | Cellulitis and abscess of abdominal wall                    |
| 26 | M032400 | Cellulitis and abscess of umbilicus                         |
| 27 | M032500 | Cellulitis and abscess of flank                             |
| 28 | M032600 | Cellulitis and abscess of groin                             |
| 29 | M032700 | Cellulitis and abscess of perineum                          |
| 30 | M032800 | Cellulitis of trunk                                         |
| 31 | M032z00 | Cellulitis and abscess of trunk NOS                         |
| 32 | M033.00 | Cellulitis and abscess of arm                               |
| 33 | M033000 | Cellulitis and abscess of shoulder                          |
| 34 | M033100 | Cellulitis and abscess of axilla                            |
| 35 | M033200 | Cellulitis and abscess of upper arm                         |
| 36 | M033300 | Cellulitis and abscess of elbow                             |
| 37 | M033400 | Cellulitis and abscess of forearm                           |
| 38 | M033z00 | Cellulitis and abscess of arm NOS                           |
| 39 | M034.00 | Cellulitis and abscess of hand excluding digits             |
| 40 | M034.11 | Cellulitis and abscess of hand                              |
| 41 | M034000 | Cellulitis and abscess of hand unspecified                  |
| 42 | M034011 | Abscess of dorsum of hand                                   |
| 43 | M034012 | Abscess of palm of hand                                     |
| 44 | M034013 | Cellulitis of dorsum of hand                                |
| 45 | M034014 | Cellulitis of palm of hand                                  |
| 46 | M034100 | Cellulitis and abscess of wrist                             |
| 47 | M034z00 | Cellulitis and abscess of hand NOS                          |
| 48 | M035.00 | Cellulitis and abscess of buttock                           |
| 49 | M036.00 | Cellulitis and abscess of leg excluding foot                |
| 50 | M036.11 | Cellulitis and abscess of leg                               |
| 51 | M036000 | Cellulitis and abscess of hip                               |
| 52 |         |                                                             |
| 53 |         |                                                             |
| 54 |         |                                                             |
| 55 |         |                                                             |
| 56 |         |                                                             |
| 57 |         |                                                             |
| 58 |         |                                                             |
| 59 |         |                                                             |
| 60 |         |                                                             |

|    |         |                                                        |
|----|---------|--------------------------------------------------------|
| 1  |         |                                                        |
| 2  | M036100 | Cellulitis and abscess of thigh                        |
| 3  | M036200 | Cellulitis and abscess of knee                         |
| 4  | M036300 | Cellulitis and abscess of lower leg                    |
| 5  | M036400 | Cellulitis and abscess of ankle                        |
| 6  | M036z00 | Cellulitis and abscess of leg NOS                      |
| 7  | M037.00 | Cellulitis and abscess of foot excluding toe           |
| 8  | M037.11 | Cellulitis and abscess of foot                         |
| 9  | M037000 | Cellulitis and abscess of foot unspecified             |
| 10 | M037100 | Cellulitis and abscess of heel                         |
| 11 | M037200 | Cellulitis in diabetic foot                            |
| 12 | M037z00 | Cellulitis and abscess of foot NOS                     |
| 13 | M038.00 | Cellulitis of external ear                             |
| 14 | M03y.00 | Other specified cellulitis and abscess                 |
| 15 | M03y000 | Cellulitis and abscess of head unspecified             |
| 16 | M03y011 | Abscess of scalp                                       |
| 17 | M03z.00 | Cellulitis and abscess NOS                             |
| 18 | M03z000 | Cellulitis NOS                                         |
| 19 | M03z100 | Abscess NOS                                            |
| 20 | M03zz00 | Cellulitis and abscess NOS                             |
| 21 | M060.00 | Pilonidal cyst with abscess                            |
| 22 | M061.00 | Pilonidal cyst with no abscess                         |
| 23 | M061.11 | Dermal sinus                                           |
| 24 | M062.00 | Pilonidal sinus with abscess                           |
| 25 | M063.00 | Pilonidal sinus without abscess                        |
| 26 | M06z.00 | Pilonidal sinus/cyst NOS                               |
| 27 | M07..00 | Other local infections of skin and subcutaneous tissue |
| 28 | M070200 | Pyoderma gangrenosum                                   |
| 29 | M070300 | Pyoderma ulcerosum tropicalum                          |
| 30 | M07y.00 | Local infection of skin or subcutaneous tissue OS      |
| 31 | M07yz00 | Other spec local skin/subc infection NOS               |
| 32 | M07yz11 | Infection toe                                          |
| 33 | M07yz12 | Infection foot                                         |
| 34 | M07yz13 | Infection finger                                       |
| 35 | M07z.00 | Local infection skin/subcut tissue NOS                 |
| 36 | M07z.11 | Infected wound from insect bite                        |
| 37 | M07z.12 | Infected skin ulcer                                    |
| 38 | M07z.13 | Septic spots                                           |
| 39 | M07z.14 | Infected dermatitis                                    |
| 40 | M07z000 | Infection foot                                         |
| 41 | M07z100 | Infection toe                                          |
| 42 | M07z200 | Infection finger                                       |
| 43 | M09..00 | Cutaneous abscess                                      |
| 44 | M090.00 | [X]Abscess of face                                     |
| 45 | M091.00 | [X]Abscess of neck                                     |
| 46 | M092.00 | [X]Abscess of trunk                                    |
| 47 | M092000 | [X]Abscess of buttock                                  |
| 48 | M092100 | [X]Abdominal wall abscess                              |
| 49 | M092200 | [X]Perineal abscess                                    |
| 50 | M093.00 | [X]Abscess of buttock                                  |
| 51 | M094.00 | [X]Abscess of limb                                     |
| 52 |         |                                                        |
| 53 |         |                                                        |
| 54 |         |                                                        |
| 55 |         |                                                        |
| 56 |         |                                                        |
| 57 |         |                                                        |
| 58 |         |                                                        |
| 59 |         |                                                        |
| 60 |         |                                                        |



|    |         |                                                              |
|----|---------|--------------------------------------------------------------|
| 1  |         |                                                              |
| 2  | M094000 | [X]Abscess of axilla                                         |
| 3  | M095.00 | Skin abscess                                                 |
| 4  | M09y.00 | [X]Abscess of other site                                     |
| 5  | M0y..00 | Other specified infections of skin or subcutaneous tissue    |
| 6  | M0z..00 | Skin and subcut tissue infection NOS                         |
| 7  | M0z..11 | Infected sebaceous cyst                                      |
| 8  | M1...00 | Other skin and subcutaneous tissue inflammatory conditions   |
| 9  | M2...00 | Other skin and subcutaneous tissue disorders                 |
| 10 |         |                                                              |
| 11 | M27..00 | Chronic skin ulcer                                           |
| 12 | M270.00 | Decubitus (pressure) ulcer                                   |
| 13 |         |                                                              |
| 14 | M270.11 | Bed sore                                                     |
| 15 | M270.12 | Plaster ulcer                                                |
| 16 | M270.13 | Pressure sore                                                |
| 17 | M270.14 | Decubitus ulcer and pressure area                            |
| 18 | M270000 | Hospital acquired pressure ulcer                             |
| 19 |         |                                                              |
| 20 | M270100 | Nursing home acquired pressure ulcer                         |
| 21 | M270200 | Community hospital acquired pressure ulcer                   |
| 22 | M270300 | Hospice acquired pressure ulcer                              |
| 23 |         |                                                              |
| 24 | M270400 | Stage I decubitus ulcer and pressure area                    |
| 25 | M270500 | Stage II decubitus ulcer                                     |
| 26 | M270600 | Stage III decubitus ulcer                                    |
| 27 | M270700 | Stage IV decubitus ulcer                                     |
| 28 |         |                                                              |
| 29 | M270z00 | Decubitus ulcer and pressure area NOS                        |
| 30 | M271.00 | Non-pressure ulcer lower limb                                |
| 31 | M271.11 | Foot ulcer                                                   |
| 32 | M271.12 | Ischaemic leg ulcer                                          |
| 33 | M271.13 | Leg ulcer NOS                                                |
| 34 |         |                                                              |
| 35 | M271.14 | Neurogenic leg ulcer                                         |
| 36 | M271.15 | Trophic leg ulcer                                            |
| 37 | M271000 | Ischaemic ulcer diabetic foot                                |
| 38 | M271100 | Neuropathic diabetic ulcer - foot                            |
| 39 | M271200 | Mixed diabetic ulcer - foot                                  |
| 40 |         |                                                              |
| 41 | M271300 | Arterial leg ulcer                                           |
| 42 | M271400 | Mixed venous and arterial leg ulcer                          |
| 43 | M271500 | Venous ulcer of leg                                          |
| 44 | M271600 | Traumatic leg ulcer                                          |
| 45 | M271700 | Neuropathic foot ulcer                                       |
| 46 |         |                                                              |
| 47 | M272.00 | Ulcer of skin                                                |
| 48 | M273.00 | Non-healing leg ulcer                                        |
| 49 | M274.00 | Recurrent leg ulcer                                          |
| 50 | M27y.00 | Chronic ulcer of skin, other specified sites                 |
| 51 | M27z.00 | Chronic skin ulcer NOS                                       |
| 52 |         |                                                              |
| 53 | M2y4D00 | Macerated perianal skin                                      |
| 54 | M2yA.00 | Skin sinus                                                   |
| 55 | M2yB.00 | Fistula of skin                                              |
| 56 | M2yz.11 | Skin lesion                                                  |
| 57 |         |                                                              |
| 58 | M2z0.00 | Skin lesion                                                  |
| 59 | Myu0.00 | [X]Infections of the skin and subcutaneous tissue            |
| 60 | Myu0100 | [X]Other specified local infections/skin+subcutaneous tissue |
|    | R153300 | [D]Positive culture findings in wound                        |

|    |         |                                                              |
|----|---------|--------------------------------------------------------------|
| 1  |         |                                                              |
| 2  | S002.00 | Open fracture vault of skull without intracranial injury     |
| 3  | S002000 | Open #skull vlt no intracranial injury, unspec state consc   |
| 4  | S002100 | Open #skull vlt no intracranial injury, no loss of consc     |
| 5  | S002200 | Open #skull vlt no intracranial injury, <1hr loss of consc   |
| 6  | S002300 | Open #skull vlt no intracranial injury, 1-24hr loss of consc |
| 7  | S002400 | Open #skull vlt no intracranial injury, >24hr LOC+recovery   |
| 8  | S002500 | Open #skull vlt no intracranial inj, >24hr LOC not restored  |
| 9  | S002600 | Open #skull vlt no intracranial injury, LOC unspec duration  |
| 10 | S002z00 | Open #skull vlt no intracranial injury + concussion unspec   |
| 11 | S003.00 | Open fracture vault of skull with intracranial injury        |
| 12 | S003000 | Open #skull vlt + intracranial injury, unspec state of consc |
| 13 | S003100 | Open #skull vlt + intracranial injury, no loss of consc      |
| 14 | S003200 | Open #skull vlt + intracranial injury, <1hr loss of consc    |
| 15 | S003300 | Open #skull vlt + intracranial injury, 1-24hr loss of consc  |
| 16 | S003400 | Open #skull vlt + intracranial injury, >24hr LOC + recovery  |
| 17 | S003500 | Open #skull vlt + intracranial inj, >24hr LOC not restored   |
| 18 | S003600 | Open #skull vlt + intracranial injury, LOC unspec duration   |
| 19 | S003z00 | Open #skull vlt with intracranial injury + concussion unspec |
| 20 | S012.00 | Open fracture base skull without mention intracranial injury |
| 21 | S012000 | Open #skull bse no intracranial inj, unspec state of consc   |
| 22 | S012100 | Open #skull bse no intracranial injury, no loss of consc     |
| 23 | S012200 | Open #skull bse no intracranial injury, <1hr loss of consc   |
| 24 | S012300 | Open #skull bse no intracranial injury, 1-24hr loss of consc |
| 25 | S012400 | Open #skull bse no intracranial injury, >24hr LOC+recovery   |
| 26 | S012500 | Open #skull bse no intracranial inj, >24hr LOC not restored  |
| 27 | S012600 | Open #skull bse no intracranial injury, LOC unspec duration  |
| 28 | S012z00 | Open #skull bse no intracranial injury + concussion unspec   |
| 29 | S013.00 | Open fracture base of skull with intracranial injury         |
| 30 | S013000 | Open #skull bse + intracranial injury, unspec state of consc |
| 31 | S013100 | Open #skull bse + intracranial injury, no loss of consc      |
| 32 | S013200 | Open #skull bse + intracranial injury, <1hr loss of consc    |
| 33 | S013300 | Open #skull bse + intracranial injury, 1-24hr loss of consc  |
| 34 | S013400 | Open #skull bse + intracranial injury, >24hr LOC + recovery  |
| 35 | S013500 | Open #skull bse + intracranial inj, >24hr LOC not restored   |
| 36 | S013600 | Open #skull bse + intracranial injury, LOC unspec duration   |
| 37 | S013z00 | Open #skull bse + intracranial injury + concussion unspec    |
| 38 | S032.00 | Open #skull NOS without mention of intracranial injury       |
| 39 | S032000 | Open #skull NOS no intracranial inj, unspec state of consc   |
| 40 | S032100 | Open #skull NOS no intracranial inj, no loss of consc        |
| 41 | S032200 | Open #skull NOS no intracranial inj, <1hr loss of consc      |
| 42 | S032300 | Open #skull NOS no intracranial inj, 1-24hrs loss of consc   |
| 43 | S032400 | Open #skull NOS no intracranial inj, >24hrs LOC + recovery   |
| 44 | S032500 | Open #skull NOS no intracranial inj, >24hrs LOC not restored |
| 45 | S032600 | Open #skull NOS no intracranial inj, LOC unspec duration     |
| 46 | S032z00 | Open #skull NOS no intracranial inj + concussion unspec      |
| 47 | S033.00 | Open fracture of skull NOS with intracranial injury          |
| 48 | S033000 | Open #skull NOS + intracranial inj, unspec state of consc    |
| 49 | S033100 | Open #skull NOS + intracranial inj, no loss of consc         |
| 50 | S033200 | Open #skull NOS + intracranial inj, <1hr loss of consc       |
| 51 | S033300 | Open #skull NOS + intracranial inj, 1-24hrs loss of consc    |
| 52 |         |                                                              |
| 53 |         |                                                              |
| 54 |         |                                                              |
| 55 |         |                                                              |
| 56 |         |                                                              |
| 57 |         |                                                              |
| 58 |         |                                                              |
| 59 |         |                                                              |
| 60 |         |                                                              |

1  
2  
3  
4  
5  
6  
7  
8  
9  
10  
11  
12  
13  
14  
15  
16  
17  
18  
19  
20  
21  
22  
23  
24  
25  
26  
27  
28  
29  
30  
31  
32  
33  
34  
35  
36  
37  
38  
39  
40  
41  
42  
43  
44  
45  
46  
47  
48  
49  
50  
51  
52  
53  
54  
55  
56  
57  
58  
59  
60

|         |                                                              |
|---------|--------------------------------------------------------------|
| S033400 | Open #skull NOS + intracranial inj, >24hrs LOC + recovery    |
| S033500 | Open #skull NOS + intracranial inj, >24hrs LOC not restored  |
| S033600 | Open #skull NOS + intracranial inj, LOC unspec duration      |
| S033z00 | Open #skull NOS + intracranial inj + concussion unspec       |
| S042000 | Open #skull/face, mult, no intracranial inj, unspec consc    |
| S042100 | Open #skull/face, mult, no intracranial inj, no loss consc   |
| S042200 | Open #skull/face, mult, no intracranial inj, <1hr LOC        |
| S042300 | Open #skull/face, mult, no intracranial inj, 1-24hrs LOC     |
| S042400 | Open #skull/face, mult, no intracran inj, >24hr LOC+recovery |
| S042500 | Open #skull/face,mult,no intracran inj,>24hr LOC no restored |
| S042600 | Open #skull/face,mult,no intracran inj, LOC unspec duration  |
| S042z00 | Open #skull/face,mult,no intracran inj, concussion unspec    |
| S043.00 | Mult #skull/face + other bones, open + intracranial injury   |
| S043000 | Open #skull/face, mult + intracranial inj, unspec consc      |
| S043100 | Open #skull/face, mult + intracranial inj, no loss consc     |
| S043200 | Open #skull/face, mult + intracranial inj, <1hr LOC          |
| S043300 | Open #skull/face, mult + intracranial inj, 1-24hrs LOC       |
| S043400 | Open #skull/face, mult + intracran inj, >24hr LOC + recovery |
| S043500 | Open #skull/face,mult + intracran inj, >24hr LOC no restored |
| S043600 | Open #skull/face, mult + intracran inj, LOC unspec duration  |
| S043z00 | Open #skull/face, mult + intracran inj + concussion, unspec  |
| S611000 | Cortex cont + open intracranial wound + unspec state consc   |
| S611100 | Cortex cont + open intracranial wound + no loss of consc     |
| S611200 | Cortex cont + open intracranial wound + <1hr loss of consc   |
| S611300 | Cortex cont + open intracranial wound + 1-24hr loss of consc |
| S611400 | Cortex cont + open intracranial wnd + >24hr LOC + recovery   |
| S611500 | Cortex cont + open intracranial wnd + >24hr LOC not restored |
| S611600 | Cortex cont + open intracranial wnd + LOC unspec duration    |
| S611z00 | Cortex cont + open intracranial wound + concussion unspec    |
| S613.00 | Cortex laceration with open intracranial wound               |
| S613000 | Cortex lacn + open intracranial wound + unspec state consc   |
| S613100 | Cortex lacn + open intracranial wound + no loss of consc     |
| S613200 | Cortex lacn + open intracranial wound + <1hr loss of consc   |
| S613300 | Cortex lacn + open intracranial wound + 1-24hr loss of consc |
| S613400 | Cortex lacn + open intracranial wound + >24hr LOC + recovery |
| S613500 | Cortex lacn + open intracranial wnd + >24hr LOC not restored |
| S613600 | Cortex lacn + open intracranial wnd + LOC unspec duration    |
| S613z00 | Cortex lacn + open intracranial wound + concussion unspec    |
| S615000 | Hind brain cont + open intracranial wnd + unspec state consc |
| S615100 | Hind brain cont + open intracranial wound + no loss consc    |
| S615200 | Hind brain cont + open intracranial wound + <1hr loss consc  |
| S615300 | Hind brain cont + open intracranial wnd + 1-24hr loss consc  |
| S615400 | Hind brain cont + open intracranial wnd +>24hr LOC +recovery |
| S615500 | Hind brain cont + open intracran wnd +>24hr LOC not restored |
| S615600 | Hind brain cont + open intracranial wnd +LOC unspec duration |
| S615z00 | Hind brain cont + open intracranial wnd + concussion unspec  |
| S617.00 | Hind brain laceration with open intracranial wound           |
| S617000 | Hind brain lacn + open intracranial wnd + unspec state consc |
| S617100 | Hind brain lacn + open intracranial wnd + no loss consc      |
| S617200 | Hind brain lacn + open intracranial wnd + <1hr loss consc    |

|    |                                                                      |
|----|----------------------------------------------------------------------|
| 1  |                                                                      |
| 2  | S617300 Hind brain lacn + open intracranial wnd + 1-24hr loss consc  |
| 3  | S617400 Hind brain lacn + open intracranial wnd+>24hr LOC + recovery |
| 4  | S617500 Hind brain lacn open intracranial wnd+>24hr LOC not restored |
| 5  | S617600 Hind brain lacn + open intracran wnd + LOC unspec duration   |
| 6  | S617z00 Hind brain lacn + open intracranial wnd + concussion unspec  |
| 7  | S61y000 Brain cont + open intracranial wound + unspec state consc    |
| 8  | S61y100 Brain cont + open intracranial wound + no loss of consc      |
| 9  | S61y200 Brain cont + open intracranial wound + <1hr loss of consc    |
| 10 | S61y300 Brain cont + open intracranial wound + 1-24hr loss of consc  |
| 11 | S61y400 Brain cont + open intracranial wound + >24hr LOC + recovery  |
| 12 | S61y500 Brain contusion + open intracr wound+>24hr LOC not ful reco  |
| 13 | S61y600 Brain cont + open intracranial wound + LOC unspec duration   |
| 14 | S61yz00 Brain cont + open intracranial wound + concussion unspec     |
| 15 | S621000 Subarachnoid h'ge inj + open intracran wound + unspec consc  |
| 16 | S621100 Subarachnoid h'ge inj + open intracranial wound + no LOC     |
| 17 | S621200 Subarachnoid h'ge inj + open intracran wound+<1hr loss consc |
| 18 | S621300 Subarachnoid h'ge inj + open intracran wnd+1-24hr loss consc |
| 19 | S621400 Subarach h'ge inj + open intracran wnd +>24hr LOC + recovery |
| 20 | S621500 Subarach h'ge inj + open intracran wnd+>24hr LOC -restored   |
| 21 | S621600 Subarach h'ge inj + open intracran wnd+LOC unspec duration   |
| 22 | S621z00 Subarachnoid h'ge inj + open intracran wnd+concussion unspec |
| 23 | S623000 Subdural h'ge inj + open intracranial wound + unspec consc   |
| 24 | S623100 Subdural h'ge inj + open intracranial wound+no loss consc    |
| 25 | S623200 Subdural h'ge inj + open intracranial wound+<1hr loss consc  |
| 26 | S623300 Subdural h'ge inj + open intracranial wnd+1-24hr loss consc  |
| 27 | S623400 Subdural h'ge inj + open intracran wound+>24hr LOC +recovery |
| 28 | S623500 Subdural h'ge inj + open intracran wnd+>24hr LOC -restored   |
| 29 | S623600 Subdural h'ge inj + open intracran wnd+LOC unspec duration   |
| 30 | S623z00 Subdural h'ge inj + open intracranial wnd+concussion unspec  |
| 31 | S625000 Extradural h'ge inj + open intracranial wnd + unspec consc   |
| 32 | S625100 Extradural h'ge inj + open intracranial wound+no loss consc  |
| 33 | S625200 Extradural h'ge inj + open intracranial wnd+<1hr loss consc  |
| 34 | S625300 Extradural h'ge inj + open intracran wnd+1-24hr loss consc   |
| 35 | S625400 Extradural h'ge inj + open intracran wnd+>24hr LOC+recovery  |
| 36 | S625500 Extradural h'ge inj + open intracran wnd+>24hr LOC -restored |
| 37 | S625600 Extradural h'ge inj + open intracran wnd+LOC unspec duration |
| 38 | S625z00 Extradural h'ge inj + open intracran wnd+concussion unspec   |
| 39 | S62A100 Traumatic extradural haematoma with open intracranial wound  |
| 40 | S631.00 Other cerebral h'ge after injury + open intracranial wound   |
| 41 | S631000 Oth cerebral h'ge inj + open intracran wnd + unspec consc    |
| 42 | S631100 Oth cerebral h'ge inj + open intracranial wnd+no loss consc  |
| 43 | S631200 Oth cerebral h'ge inj + open intracran wnd+<1hr loss consc   |
| 44 | S631300 Oth cerebral h'ge inj + open intracran wnd+1-24hr loss consc |
| 45 | S631400 Oth cereb h'ge inj + open intracran wnd+>24hr LOC + recovery |
| 46 | S631500 Oth cereb h'ge inj + open intracran wnd+>24hr LOC -restored  |
| 47 | S631600 Oth cereb h'ge inj + open intracran wnd+LOC unspec duration  |
| 48 | S631z00 Oth cereb h'ge inj + open intracran wnd+concussion unspec    |
| 49 | S641.00 Intracranial injury NOS + open intracranial wound            |
| 50 | S641000 Intracranial inj NOS + open intracranial wnd + unspec consc  |
| 51 | S641100 Intracranial inj NOS + open intracranial wound+no loss consc |
| 52 |                                                                      |
| 53 |                                                                      |
| 54 |                                                                      |
| 55 |                                                                      |
| 56 |                                                                      |
| 57 |                                                                      |
| 58 |                                                                      |
| 59 |                                                                      |
| 60 |                                                                      |

|    |         |                                                              |
|----|---------|--------------------------------------------------------------|
| 1  |         |                                                              |
| 2  | S641200 | Intracranial inj NOS + open intracranial wnd+<1hr loss consc |
| 3  | S641300 | Intracranial inj NOS + open intracranial wnd + 1-24hr LOC    |
| 4  | S641400 | Intracranial inj NOS + open intracran wnd+>24hr LOC+recovery |
| 5  | S641500 | Intracran inj NOS + open intracran wnd+>24hr LOC -restored   |
| 6  | S641600 | Intracran inj NOS + open intracran wnd+LOC unspec duration   |
| 7  | S641z00 | Intracranial inj NOS + open intracran wnd+concussion unspec  |
| 8  | S642100 | Traumatic cerebral oedema with open intracranial wound       |
| 9  | S645100 | Intracranial injury with prolonged coma with open wound      |
| 10 |         |                                                              |
| 11 | S701.00 | Open traumatic pneumothorax                                  |
| 12 | S703.00 | Open traumatic haemothorax                                   |
| 13 | S705.00 | Open traumatic haemopneumothorax                             |
| 14 | S711.00 | Heart injury, open                                           |
| 15 | S711000 | Heart injury with open wound into thorax, unspecified        |
| 16 | S711100 | Heart contusion, with open wound into thorax                 |
| 17 | S711200 | Heart laceration open, without penetration of heart chambers |
| 18 | S711300 | Heart laceration open, with penetration of heart chambers    |
| 19 | S711z00 | Heart injury with open wound into thorax NOS                 |
| 20 | S713000 | Lung injury with open wound into thorax, unspecified         |
| 21 | S713100 | Lung contusion with open wound into thorax                   |
| 22 | S713200 | Lung laceration with open wound into thorax                  |
| 23 | S713z00 | Lung injury with open wound into thorax, NOS                 |
| 24 | S73yz00 | Gastrointestinal tract injury with open wound to cavity NOS  |
| 25 | S8...00 | Open wound of head, neck and trunk                           |
| 26 | S8...12 | Open wound of head                                           |
| 27 | S8...13 | Open wound of trunk                                          |
| 28 | S80..00 | Open wound of ocular adnexa                                  |
| 29 | S80..11 | Open wound of eyelid                                         |
| 30 | S80..12 | Periocular open wound                                        |
| 31 | S800.00 | Eyelid skin and periocular area laceration                   |
| 32 | S803.00 | Penetrating wound of orbit without mention of foreign body   |
| 33 | S804.00 | Penetrating wound of orbit with foreign body                 |
| 34 | S80y.00 | Other open ocular adnexa wound                               |
| 35 | S80z.00 | Open wound of ocular adnexa NOS                              |
| 36 | S81..00 | Open wound of eyeball                                        |
| 37 | S81..12 | Open wound of eye                                            |
| 38 | S810.00 | Ocular laceration without intraocular prolapse               |
| 39 | S81z.00 | Open wound of eyeball NOS                                    |
| 40 | S82..00 | Open wound of ear                                            |
| 41 | S820.00 | Open wound of external ear                                   |
| 42 | S820000 | Open wound of external ear, unspecified                      |
| 43 | S820100 | Open wound of ear auricle                                    |
| 44 | S820w00 | Other open wound of external ear                             |
| 45 | S820z00 | Open wound of external ear not otherwise specified           |
| 46 | S821.00 | Open wound of external ear with complication                 |
| 47 | S821000 | Open wound of external ear with complication, unspecified    |
| 48 | S821100 | Open wound of ear auricle with complication                  |
| 49 | S821z00 | Open wound of external ear with complication, NOS            |
| 50 | S82v.00 | Other open wound of ear                                      |
| 51 | S82v011 | Open wound of drumhead without complication                  |
| 52 | S82v012 | Open wound of tympanic membrane without complication         |



|    |         |                                                          |
|----|---------|----------------------------------------------------------|
| 1  | S82v100 | Open wound of ear ossicle                                |
| 2  | S82v300 | Open wound of cochlea                                    |
| 3  | S82vz00 | Other open wound of ear NOS                              |
| 4  | S82w.00 | Other open wound of ear with complication                |
| 5  | S82w000 | Open wound of ear drum with complication                 |
| 6  | S82w100 | Open wound of ear ossicle with complication              |
| 7  | S82w300 | Open wound of cochlea with complication                  |
| 8  | S82wz00 | Other open wound of ear with complication NOS            |
| 9  | S82x.00 | Open wound of ear, uncomplicated not otherwise specified |
| 10 | S82y.00 | Open wound of ear with complication, NOS                 |
| 11 | S82z.00 | Open wound of ear NOS                                    |
| 12 | S83..00 | Other open wound of head                                 |
| 13 | S830.00 | Open wound of scalp                                      |
| 14 | S830100 | Avulsion of scalp                                        |
| 15 | S831.00 | Open wound of scalp with complication                    |
| 16 | S832.00 | Open wound of nose                                       |
| 17 | S832000 | Open wound of nose, unspecified                          |
| 18 | S832100 | Open wound of nasal septum                               |
| 19 | S832200 | Open wound of nasal cavity                               |
| 20 | S832300 | Open wound of nasal sinus                                |
| 21 | S832x00 | Multiple wounds of nose                                  |
| 22 | S832z00 | Open wound of nose NOS                                   |
| 23 | S833.00 | Open wound of nose with complication                     |
| 24 | S833000 | Open wound of nose with complication, unspecified        |
| 25 | S833100 | Open wound of nasal septum with complication             |
| 26 | S833200 | Open wound of nasal cavity with complication             |
| 27 | S833300 | Open wound of nasal sinus with complication              |
| 28 | S833x00 | Multiple open wounds of nose with complication           |
| 29 | S833z00 | Open wound of nose with complication, NOS                |
| 30 | S834.00 | Open wound of face                                       |
| 31 | S834000 | Open wound of face, unspecified                          |
| 32 | S834100 | Open wound of cheek                                      |
| 33 | S834200 | Open wound of forehead                                   |
| 34 | S834300 | Open wound of eyebrow                                    |
| 35 | S834400 | Open wound of lip                                        |
| 36 | S834500 | Open wound of jaw                                        |
| 37 | S834600 | Open wound of chin                                       |
| 38 | S834x00 | Multiple open wounds of face                             |
| 39 | S834z00 | Open wound of face, NOS                                  |
| 40 | S835.00 | Open wound of face with complication                     |
| 41 | S835000 | Open wound of face with complication, unspecified        |
| 42 | S835100 | Open wound of cheek with complication                    |
| 43 | S835200 | Open wound of forehead with complication                 |
| 44 | S835300 | Open wound of eyebrow with complication                  |
| 45 | S835400 | Open wound of lip with complication                      |
| 46 | S835500 | Open wound of jaw with complication                      |
| 47 | S835x00 | Multiple open wounds of face with complication           |
| 48 | S835z00 | Open wound of face with complication, NOS                |
| 49 | S836.00 | Open wound in mouth                                      |
| 50 | S836000 | Open wound in mouth, unspecified                         |
| 51 |         |                                                          |
| 52 |         |                                                          |
| 53 |         |                                                          |
| 54 |         |                                                          |
| 55 |         |                                                          |
| 56 |         |                                                          |
| 57 |         |                                                          |
| 58 |         |                                                          |
| 59 |         |                                                          |
| 60 |         |                                                          |

|    |         |                                                            |
|----|---------|------------------------------------------------------------|
| 1  |         |                                                            |
| 2  | S836100 | Open wound of buccal mucosa                                |
| 3  | S836200 | Open wound of gum                                          |
| 4  | S836400 | Open wound of tongue                                       |
| 5  | S836500 | Open wound of mouth floor                                  |
| 6  | S836600 | Open wound of palate                                       |
| 7  | S837100 | Open wound of buccal mucosa with complication              |
| 8  | S837200 | Open wound of gum with complication                        |
| 9  | S837400 | Open wound of tongue with complication                     |
| 10 | S837500 | Open wound of mouth floor with complication                |
| 11 | S837600 | Open wound of palate with complication                     |
| 12 | S83x.00 | Other open wound of head                                   |
| 13 | S83y.00 | Other open wound of head with complication                 |
| 14 | S83z.00 | Open wound of head NOS                                     |
| 15 | S84..00 | Open wound of neck                                         |
| 16 | S840.00 | Open wound of larynx and trachea                           |
| 17 | S840.11 | Open wound of larynx without complication                  |
| 18 | S840.12 | Open wound of trachea without complication                 |
| 19 | S840000 | Open wound of larynx and trachea, unspecified              |
| 20 | S840100 | Open wound of larynx                                       |
| 21 | S840200 | Open wound of trachea                                      |
| 22 | S840z00 | Open wound of larynx and trachea not otherwise specified   |
| 23 | S841.00 | Open wound of larynx and trachea with complication         |
| 24 | S841.11 | Open wound of larynx with complication                     |
| 25 | S841.12 | Open wound of trachea with complication                    |
| 26 | S841000 | Open wound of larynx and trachea with complication, unspec |
| 27 | S841100 | Open wound of larynx with complication                     |
| 28 | S841200 | Open wound of trachea with complication                    |
| 29 | S841z00 | Open wound of larynx and trachea with complication, NOS    |
| 30 | S842.00 | Open wound of thyroid                                      |
| 31 | S843.00 | Open wound of thyroid with complication                    |
| 32 | S844.00 | Open wound of pharynx                                      |
| 33 | S845.00 | Open wound of pharynx with complication                    |
| 34 | S84x.00 | Other open wound of neck                                   |
| 35 | S84x000 | Open wound of neck nape                                    |
| 36 | S84x100 | Open wound of supraclavicular region                       |
| 37 | S84xz00 | Open wound of neck, NOS                                    |
| 38 | S84xz11 | Open wound of throat NOS                                   |
| 39 | S84y.00 | Other open wound of neck with complication                 |
| 40 | S84y000 | Open wound of neck nape with complication                  |
| 41 | S84y100 | Open wound of supraclavicular region with complication     |
| 42 | S84yz00 | Open wound of neck with complication, NOS                  |
| 43 | S84z.00 | Open wound of neck NOS                                     |
| 44 | S85..00 | Open wound of chest wall                                   |
| 45 | S850.00 | Open wound of chest wall, uncomplicated                    |
| 46 | S850000 | Degloving injury chest wall                                |
| 47 | S851.00 | Open wound of chest wall with complication                 |
| 48 | S852.00 | Open wound of front wall of thorax                         |
| 49 | S853.00 | Multiple open wounds of thoracic wall                      |
| 50 | S855.00 | Open wound of back wall of thorax                          |
| 51 | S85X.00 | Open wound of thorax, part unspecified                     |
| 52 |         |                                                            |
| 53 |         |                                                            |
| 54 |         |                                                            |
| 55 |         |                                                            |
| 56 |         |                                                            |
| 57 |         |                                                            |
| 58 |         |                                                            |
| 59 |         |                                                            |
| 60 |         |                                                            |



|    |         |                                                              |
|----|---------|--------------------------------------------------------------|
| 1  | S85z.00 | Open wound of chest wall NOS                                 |
| 2  | S86..00 | Open wound of back                                           |
| 3  | S86..11 | Open wound of loin                                           |
| 4  | S86..12 | Open wound of lumbar region                                  |
| 5  | S860.00 | Open wound of back, uncomplicated                            |
| 6  | S860000 | Degloving injury back                                        |
| 7  | S861.00 | Open wound of back with complication                         |
| 8  | S86z.00 | Open wound of back NOS                                       |
| 9  | S87..00 | Open wound of buttock                                        |
| 10 | S87..11 | Open wound of sacroiliac region                              |
| 11 | S870.00 | Open wound of buttock, uncomplicated                         |
| 12 | S870000 | Degloving injury buttock                                     |
| 13 | S871.00 | Open wound of buttock with complication                      |
| 14 | S87z.00 | Open wound of buttock NOS                                    |
| 15 | S88..00 | Open wound of external genital organs                        |
| 16 | S880.00 | Open wound of penis                                          |
| 17 | S880000 | Degloving injury penis                                       |
| 18 | S881.00 | Open wound of penis with complication                        |
| 19 | S882.00 | Open wound of scrotum and testes                             |
| 20 | S882000 | Open wound of scrotum                                        |
| 21 | S882100 | Open wound of testes                                         |
| 22 | S882200 | Degloving injury scrotum                                     |
| 23 | S882z00 | Open wound of scrotum and testes not otherwise specified     |
| 24 | S883.00 | Open wound of scrotum and testes with complication           |
| 25 | S883000 | Open wound of scrotum with complication                      |
| 26 | S883100 | Open wound of testes with complication                       |
| 27 | S883z00 | Open wound of scrotum and testes with complication, NOS      |
| 28 | S884.00 | Open wound of vulva                                          |
| 29 | S884000 | Open wound of vulva, unspecified                             |
| 30 | S884100 | Open wound of labium majus                                   |
| 31 | S884200 | Open wound of labium minus                                   |
| 32 | S884z00 | Open wound of vulva, NOS                                     |
| 33 | S885.00 | Open wound of vulva with complication                        |
| 34 | S885000 | Open wound of vulva with complication, unspecified           |
| 35 | S885100 | Open wound of labium majus with complication                 |
| 36 | S885200 | Open wound of labium minus with complication                 |
| 37 | S885z00 | Open wound of vulva with complication, NOS                   |
| 38 | S886.00 | Open wound of vagina                                         |
| 39 | S887.00 | Open wound of vagina with complication                       |
| 40 | S88x.00 | Other open wound of external genital organ                   |
| 41 | S88y.00 | Other open wound of external genital organ with complication |
| 42 | S88z.00 | Open wound of external genital organ NOS                     |
| 43 | S89..00 | Other open wounds of other sites, excluding limbs            |
| 44 | S890.00 | Open wound of breast                                         |
| 45 | S891.00 | Open wound of breast with complication                       |
| 46 | S892.00 | Open wound of anterior abdominal wall                        |
| 47 | S892000 | Open wound of epigastric region                              |
| 48 | S892100 | Open wound umbilical region                                  |
| 49 | S892200 | Open wound of hypogastric region                             |
| 50 | S892300 | Open wound of pubic region without complication              |

|    |         |                                                              |
|----|---------|--------------------------------------------------------------|
| 1  |         |                                                              |
| 2  | S892z00 | Open wound anterior abdominal wall without complication NOS  |
| 3  | S893.00 | Open wound of anterior abdominal wall with complication      |
| 4  | S893000 | Open wound of epigastrium with complication                  |
| 5  | S893100 | Open wound of umbilical region with complication             |
| 6  | S893200 | Open wound of hypogastrium with complication                 |
| 7  | S893300 | Open wound of pubic region with complication                 |
| 8  | S893z00 | Open wound of anterior abdominal wall with complication NOS  |
| 9  | S894.00 | Open wound of lateral abdominal wall                         |
| 10 | S894000 | Open wound of hypochondrium                                  |
| 11 | S894100 | Open wound of lumbar region                                  |
| 12 | S894111 | Open wound of flank without complication                     |
| 13 | S894200 | Open wound of iliac region                                   |
| 14 | S894300 | Open wound of inguinal region                                |
| 15 | S894311 | Open wound of groin without complication                     |
| 16 | S894400 | Open wound of flank without complication                     |
| 17 | S894500 | Open wound of loin                                           |
| 18 | S894z00 | Open wound of lateral abdominal wall NOS                     |
| 19 | S895.00 | Open wound of lateral abdominal wall with complication       |
| 20 | S895000 | Open wound of hypochondrium with complication                |
| 21 | S895100 | Open wound of lumbar region with complication                |
| 22 | S895111 | Open wound of flank with complication                        |
| 23 | S895200 | Open wound of iliac region with complication                 |
| 24 | S895300 | Open wound of inguinal region with complication              |
| 25 | S895311 | Open wound of groin with complication                        |
| 26 | S895400 | Open wound of flank with complication                        |
| 27 | S895z00 | Open wound of lateral abdominal wall with complication, NOS  |
| 28 | S89v.00 | Other and unspecified open wound of trunk                    |
| 29 | S89v000 | Open wound of pelvic region                                  |
| 30 | S89v100 | Open wound of perineum                                       |
| 31 | S89vz00 | Other and unspecified open wound of trunk, NOS               |
| 32 | S89w.00 | Other and unspecified open wound of trunk with complication  |
| 33 | S89w000 | Open wound of pelvic region with complication                |
| 34 | S89w100 | Open wound of perineum with complication                     |
| 35 | S89wz00 | Other and unspecified open wound trunk with complication NOS |
| 36 | S89x.00 | Multiple open wounds, of unspecified site                    |
| 37 | S89y.00 | Multiple open wounds with complication, of unspecified site  |
| 38 | S89z.00 | Other open wounds NOS                                        |
| 39 | S8A..00 | Open wounds involving head with neck                         |
| 40 | S8z..00 | Open wound of head, neck and trunk NOS                       |
| 41 | S8z..11 | Laceration NOS                                               |
| 42 | S8z..12 | Traumatic ulcer NOS                                          |
| 43 | S8z..13 | Laceration                                                   |
| 44 | S9...00 | Open wound of upper limb                                     |
| 45 | S9...11 | Laceration of arm                                            |
| 46 | S9...12 | Open wound of arm                                            |
| 47 | S90..00 | Open wound of shoulder region and upper limb                 |
| 48 | S900.00 | Open wound of shoulder/upper limb without complication       |
| 49 | S900000 | Open wound of shoulder region                                |
| 50 | S900100 | Open wound of scapular region                                |
| 51 | S900200 | Open wound of axillary region                                |

|    |         |                                                             |
|----|---------|-------------------------------------------------------------|
| 1  |         |                                                             |
| 2  | S900300 | Open wound of upper arm                                     |
| 3  | S900400 | Multiple open wounds of shoulder and upper arm              |
| 4  | S900x00 | Multiple open wounds of upper arm                           |
| 5  | S900z00 | Open wound of shoulder and upper limb NOS                   |
| 6  | S901.00 | Open wound of shoulder and upper limb with complication     |
| 7  | S901000 | Open wound of shoulder region with complication             |
| 8  | S901100 | Open wound of scapular region with complication             |
| 9  | S901200 | Open wound of axillary region with complication             |
| 10 | S901300 | Open wound of upper arm with complication                   |
| 11 | S901x00 | Multiple open wounds of upper arm with complication         |
| 12 | S901z00 | Open wound of shoulder and upper arm with complication, NOS |
| 13 | S902.00 | Open wound of shoulder/upper limb with tendon involvement   |
| 14 | S902.11 | Open wound of arm with tendon injury                        |
| 15 | S902000 | Open wound of shoulder region with tendon involvement       |
| 16 | S902100 | Open wound of scapular region with tendon involvement       |
| 17 | S902200 | Open wound of axillary region with tendon involvement       |
| 18 | S902300 | Open wound of upper arm with tendon involvement             |
| 19 | S902x00 | Multiple open wounds of upper arm with tendon involvement   |
| 20 | S902z00 | Open wound shoulder/upper arm with tendon involvement, NOS  |
| 21 | S903.00 | Degloving injury, shoulder or upper arm                     |
| 22 | S903000 | Degloving injury, shoulder area                             |
| 23 | S903100 | Degloving injury, scapular area                             |
| 24 | S903200 | Degloving injury, axilla                                    |
| 25 | S903300 | Degloving injury, upper arm                                 |
| 26 | S90z.00 | Open wound of shoulder region and upper arm NOS             |
| 27 | S91..00 | Open wound of elbow, forearm and wrist                      |
| 28 | S910.00 | Open wound of lower arm without mention of complication     |
| 29 | S910000 | Open wound of forearm                                       |
| 30 | S910100 | Open wound of elbow                                         |
| 31 | S910200 | Open wound of wrist, unspecified                            |
| 32 | S910300 | Open wound of wrist, volar                                  |
| 33 | S910400 | Open wound of wrist, dorsal                                 |
| 34 | S910z00 | Open wound of lower arm, NOS                                |
| 35 | S911.00 | Open wound of lower arm with complication                   |
| 36 | S911000 | Open wound of forearm with complication                     |
| 37 | S911100 | Open wound of elbow with complication                       |
| 38 | S911200 | Open wound of wrist with complication                       |
| 39 | S911z00 | Open wound of lower arm with complication, NOS              |
| 40 | S912.00 | Open wound of lower arm with tendon involvement             |
| 41 | S912.11 | Open wound of lower arm with tendon injury                  |
| 42 | S912000 | Open wound of forearm with tendon involvement               |
| 43 | S912100 | Open wound of elbow with tendon involvement                 |
| 44 | S912200 | Open wound of wrist with tendon involvement                 |
| 45 | S912300 | Complete division extensor tendon wrist                     |
| 46 | S912400 | Complete division flexor tendon wrist                       |
| 47 | S912z00 | Open wound of lower arm with tendon involvement, NOS        |
| 48 | S913.00 | Degloving injury lower arm                                  |
| 49 | S913000 | Degloving injury, forearm                                   |
| 50 | S913100 | Degloving injury, elbow area                                |
| 51 | S913200 | Degloving injury wrist, volar                               |
| 52 |         |                                                             |
| 53 |         |                                                             |
| 54 |         |                                                             |
| 55 |         |                                                             |
| 56 |         |                                                             |
| 57 |         |                                                             |
| 58 |         |                                                             |
| 59 |         |                                                             |
| 60 |         |                                                             |

|    |         |                                                             |
|----|---------|-------------------------------------------------------------|
| 1  |         |                                                             |
| 2  | S913300 | Degloving injury wrist, dorsum                              |
| 3  | S91z.00 | Open wound of elbow, forearm and wrist NOS                  |
| 4  | S92..00 | Open wound of hand, excluding finger(s)                     |
| 5  | S920.00 | Open wound of hand without mention of complication          |
| 6  | S920000 | Open wound of hand, palm                                    |
| 7  | S920100 | Open wound of hand, dorsum                                  |
| 8  | S920200 | Multiple open wounds of wrist and hand                      |
| 9  | S921.00 | Open wound of hand with complication                        |
| 10 | S922.00 | Open wound of hand with tendon involvement                  |
| 11 | S923.00 | Degloving injury hand                                       |
| 12 | S923000 | Degloving injury hand, palmar                               |
| 13 | S923100 | Degloving injury hand, dorsum                               |
| 14 | S924.00 | Severe multi tissue damage hand                             |
| 15 | S925.00 | Massive multi tissue damage hand                            |
| 16 | S92z.00 | Open wound of hand, excluding fingers, NOS                  |
| 17 | S93..00 | Open wound of finger(s) or thumb                            |
| 18 | S93..11 | Open wound of fingernail                                    |
| 19 | S93..12 | Open wound of nail                                          |
| 20 | S93..13 | Open wound of thumb                                         |
| 21 | S93..14 | Open wound of thumbnail                                     |
| 22 | S930.00 | Open wound of finger or thumb without mention of complicatn |
| 23 | S930000 | Open wound, finger                                          |
| 24 | S930100 | Open wound, finger, multiple                                |
| 25 | S930200 | Open wound, thumb                                           |
| 26 | S931.00 | Open wound of finger or thumb with complication             |
| 27 | S932.00 | Open wound of finger or thumb with tendon involvement       |
| 28 | S932.11 | Open wound of finger with tendon injury                     |
| 29 | S932000 | Complete division, flexor digitorum superficialis tendon    |
| 30 | S932100 | Complete division, flexor digitorum profundus tendon        |
| 31 | S932200 | Complete division, both flexor tendons                      |
| 32 | S932300 | Complete division, extensor digitorum tendon                |
| 33 | S932400 | Mallet finger with open tendon injury                       |
| 34 | S932500 | Complete division, flexor pollicis longus tendon            |
| 35 | S932600 | Complete division, extensor pollicis longus tendon          |
| 36 | S932700 | Mallet thumb with open tendon injury                        |
| 37 | S933.00 | Degloving injury, finger                                    |
| 38 | S933000 | Degloving injury, finger unspecified                        |
| 39 | S933100 | Degloving injury, finger, multiple                          |
| 40 | S933200 | Ring avulsion injury, class 1                               |
| 41 | S933300 | Ring avulsion injury, class 2                               |
| 42 | S933400 | Ring avulsion injury, class 3                               |
| 43 | S933500 | Ring avulsion injury, class 4                               |
| 44 | S934.00 | Degloving injury, thumb                                     |
| 45 | S935.00 | Open wound fingernail                                       |
| 46 | S936.00 | Open wound thumbnail                                        |
| 47 | S937.00 | Open wound of finger with damage to nail                    |
| 48 | S938.00 | Open wound of thumb with damage to nail                     |
| 49 | S93z.00 | Open wound of finger(s) NOS                                 |
| 50 | S94..00 | Multiple and unspecified open wound of upper limb           |
| 51 | S940.00 | Multiple/unspec open wound upper limb without complication  |
| 52 |         |                                                             |
| 53 |         |                                                             |
| 54 |         |                                                             |
| 55 |         |                                                             |
| 56 |         |                                                             |
| 57 |         |                                                             |
| 58 |         |                                                             |
| 59 |         |                                                             |
| 60 |         |                                                             |

|    |         |                                                             |
|----|---------|-------------------------------------------------------------|
| 1  |         |                                                             |
| 2  | S941.00 | Multiple/unspec open wound of upper limb with complication  |
| 3  | S942.00 | Multiple/unspec open wound upper limb with tendon involved  |
| 4  | S942.11 | Multiple/unspec open wound of upper limb with tendon injury |
| 5  | S94z.00 | Multiple and unspecified open wound of upper limb NOS       |
| 6  | S96X.00 | Comb traum amp of (part of) fing(s) + oth part wrist/hand   |
| 7  | S9z..00 | Open wound of upper limb NOS                                |
| 8  | SA...00 | Open wound of lower limb                                    |
| 9  | SA...11 | Open wound of leg                                           |
| 10 | SA...12 | Laceration - leg                                            |
| 11 | SA0..00 | Open wound of hip and thigh                                 |
| 12 | SA00.00 | Open wound of hip and thigh without mention of complication |
| 13 | SA00000 | Open wound of hip                                           |
| 14 | SA00100 | Open wound of thigh                                         |
| 15 | SA00z00 | Open wound hip and thigh, NOS                               |
| 16 | SA01.00 | Open wound of hip and thigh with complication               |
| 17 | SA01000 | Open wound of hip with complication                         |
| 18 | SA01100 | Open wound of thigh with complication                       |
| 19 | SA01z00 | Open wound of hip and thigh with complication, NOS          |
| 20 | SA02.00 | Open wound of hip and thigh with tendon involvement         |
| 21 | SA02.11 | Open wound of hip and thigh with tendon injury              |
| 22 | SA02000 | Open wound of hip with tendon involvement                   |
| 23 | SA02100 | Open wound of thigh with tendon involvement                 |
| 24 | SA02200 | Complete division, quadriceps tendon                        |
| 25 | SA02300 | Complete division, hamstring tendon                         |
| 26 | SA02z00 | Open wound of hip and thigh with tendon involvement, NOS    |
| 27 | SA03.00 | Degloving injury, hip or thigh                              |
| 28 | SA03000 | Degloving injury, hip                                       |
| 29 | SA03100 | Degloving injury, thigh                                     |
| 30 | SA04.00 | Severe multi tissue damage hip or thigh                     |
| 31 | SA05.00 | Massive multi tissue damage hip or thigh                    |
| 32 | SA0z.00 | Open wound of hip and thigh NOS                             |
| 33 | SA1..00 | Open wound of knee, leg and ankle                           |
| 34 | SA10.00 | Open wound of knee, leg and ankle without complication      |
| 35 | SA10000 | Open wound of knee                                          |
| 36 | SA10100 | Open wound of leg                                           |
| 37 | SA10200 | Open wound of ankle                                         |
| 38 | SA10z00 | Open wound of knee, leg and ankle NOS                       |
| 39 | SA11.00 | Open wound of knee, leg and ankle with complication         |
| 40 | SA11000 | Open wound of knee with complication                        |
| 41 | SA11100 | Open wound of lower leg with complication                   |
| 42 | SA11200 | Open wound of ankle with complication                       |
| 43 | SA11z00 | Open wound of knee/leg/ankle with complication, NOS         |
| 44 | SA12.00 | Open wound of knee, leg and ankle with tendon involvement   |
| 45 | SA12.11 | Open wound of leg with tendon injury                        |
| 46 | SA12000 | Open wound of knee with tendon involvement                  |
| 47 | SA12100 | Open wound of lower leg with tendon involvement             |
| 48 | SA12200 | Open wound of ankle with tendon involvement                 |
| 49 | SA12300 | Complete division, patellar tendon                          |
| 50 | SA12400 | Complete division, tendocalcaneus (Achilles tendon)         |
| 51 | SA12z00 | Open wound of knee/leg/ankle with tendon involvement, NOS   |
| 52 |         |                                                             |
| 53 |         |                                                             |
| 54 |         |                                                             |
| 55 |         |                                                             |
| 56 |         |                                                             |
| 57 |         |                                                             |
| 58 |         |                                                             |
| 59 |         |                                                             |
| 60 |         |                                                             |

|    |         |                                                            |
|----|---------|------------------------------------------------------------|
| 1  |         |                                                            |
| 2  | SA13.00 | Degloving injury, knee or leg or ankle                     |
| 3  | SA13000 | Degloving injury, knee                                     |
| 4  | SA13100 | Degloving injury, lower leg                                |
| 5  | SA13200 | Degloving injury, ankle                                    |
| 6  |         |                                                            |
| 7  | SA14.00 | Severe multi tissue damage lower leg                       |
| 8  | SA15.00 | Massive multi tissue damage lower leg                      |
| 9  | SA16.00 | Multiple injuries of ankle and foot                        |
| 10 | SA1z.00 | Open wound of knee, leg and ankle NOS                      |
| 11 | SA2..00 | Open wound of foot, excluding toe(s)                       |
| 12 | SA2..11 | Open wound of heel                                         |
| 13 |         |                                                            |
| 14 | SA20.00 | Open wound of foot without mention of complication         |
| 15 | SA20100 | Open wound foot, plantar                                   |
| 16 | SA20200 | Open wound foot, dorsum                                    |
| 17 | SA20300 | Open wound, heel                                           |
| 18 | SA21.00 | Open wound of foot with complication                       |
| 19 | SA22.00 | Open wound of foot with tendon involvement                 |
| 20 | SA22.11 | Open wound of foot with tendon injury                      |
| 21 | SA22000 | Complete division, flexor tendon, foot                     |
| 22 | SA22100 | Complete division, extensor tendon, foot                   |
| 23 |         |                                                            |
| 24 | SA23.00 | Degloving injury, foot                                     |
| 25 | SA23000 | Degloving injury foot, plantar                             |
| 26 | SA23100 | Degloving injury foot, dorsum                              |
| 27 | SA23200 | Degloving injury heel                                      |
| 28 |         |                                                            |
| 29 | SA24.00 | Severe multi tissue damage foot                            |
| 30 | SA25.00 | Massive multi tissue damage foot                           |
| 31 | SA2z.00 | Open wound of foot NOS                                     |
| 32 | SA3..00 | Open wound of toe(s)                                       |
| 33 | SA3..11 | Open wound of toenail                                      |
| 34 | SA30.00 | Open wound of toe(s) without mention of complication       |
| 35 | SA31.00 | Open wound of toe(s) with complication                     |
| 36 | SA32.00 | Open wound of toe(s) with tendon involvement               |
| 37 | SA32.11 | Open wound of toe(s) with tendon injury                    |
| 38 | SA33.00 | Degloving injury toe(s)                                    |
| 39 | SA33000 | Degloving injury toe                                       |
| 40 | SA33100 | Degloving injury, multiple toes                            |
| 41 | SA34.00 | Open wound of toe(s) with damage to nail                   |
| 42 | SA3z.00 | Open wound of toe(s) NOS                                   |
| 43 | SA4..00 | Multiple and unspecified open wound of lower limb          |
| 44 | SA40.00 | Multiple and unspec open wound leg, without complication   |
| 45 | SA41.00 | Multiple and unspec open wound of leg with complication    |
| 46 | SA42.00 | Multiple and unspec open wound leg with tendon involvement |
| 47 | SA4z.00 | Multiple and unspecified open wound of lower limb NOS      |
| 48 |         |                                                            |
| 49 | SA9..00 | Multiple open wounds of hip and thigh                      |
| 50 | SAA..00 | Open wounds involving multiple regions of lower limb(s)    |
| 51 | SAz..00 | Open wound of lower limb NOS                               |
| 52 | SC10.00 | Late effect of open wound of head, neck and trunk          |
| 53 | SC11.00 | Late effect of open wound arm or leg without tendon injury |
| 54 | SC15.00 | Late effect of burn of eye, head and neck                  |
| 55 | SC15.11 | Late effect of burn of head or neck                        |
| 56 | SC16.00 | Late effect of burn of wrist and hand                      |
| 57 |         |                                                            |
| 58 |         |                                                            |
| 59 |         |                                                            |
| 60 |         |                                                            |



|    |         |                                                              |
|----|---------|--------------------------------------------------------------|
| 1  |         |                                                              |
| 2  | SC17.00 | Late effect of burn of arm, leg and foot                     |
| 3  | SC17.11 | Late effect of burn of arm or leg                            |
| 4  | SC18.00 | Late effect of other burns                                   |
| 5  | SC19.00 | Late effect of burn NOS                                      |
| 6  | SC1A.00 | Late effect of burn of upper limb                            |
| 7  | SC38.00 | Sequelae of open wound of head                               |
| 8  | SC3A.00 | Sequelae of superficial injury + open wound of neck + trunk  |
| 9  | SC3C.00 | Sequelae of open wound of upper limb                         |
| 10 | SC3D000 | Sequelae of open wound of lower limb                         |
| 11 | SC44.00 | Sequelae of burns, corrosions and frostbite                  |
| 12 | SC44000 | Sequelae of burn, corrosion and frostbite of trunk           |
| 13 | SC44100 | Sequelae of burn, corrosion and frostbite of lower limb      |
| 14 | SC44200 | Seq/burn+corros classfbl only accord extent/body surf involv |
| 15 | SD01.00 | Abrasion or friction burn of head, infected                  |
| 16 | SD01.11 | Abrasion or friction burn of head, infected                  |
| 17 | SD01000 | Abrasion of face, infected                                   |
| 18 | SD01100 | Abrasion of neck, infected                                   |
| 19 | SD01200 | Abrasion of scalp, infected                                  |
| 20 | SD01z00 | Abrasion or friction burn of head, infected, NOS             |
| 21 | SD03.00 | Blister of head, infected                                    |
| 22 | SD03000 | Blister of face, infected                                    |
| 23 | SD03100 | Blister of neck, infected                                    |
| 24 | SD03200 | Blister of scalp, infected                                   |
| 25 | SD03z00 | Blister of head, infected, NOS                               |
| 26 | SD05.00 | Insect bite, nonvenomous, of head, infected                  |
| 27 | SD05.11 | Insect bite, nonvenomous, of head, infected                  |
| 28 | SD05000 | Insect bite, nonvenomous, of face, infected                  |
| 29 | SD05100 | Insect bite, nonvenomous, of neck, infected                  |
| 30 | SD05200 | Insect bite, nonvenomous, of scalp, infected                 |
| 31 | SD05z00 | Insect bite, nonvenomous, of head, infected, NOS             |
| 32 | SD11.00 | Abrasion or friction burn of trunk, infected                 |
| 33 | SD11000 | Abrasion of interscapular region, infected                   |
| 34 | SD11100 | Abrasion of chest wall, infected                             |
| 35 | SD11200 | Abrasion of breast, infected                                 |
| 36 | SD11300 | Abrasion of abdominal wall, infected                         |
| 37 | SD11400 | Abrasion of back, infected                                   |
| 38 | SD11500 | Abrasion of buttock, infected                                |
| 39 | SD11600 | Abrasion of anus, infected                                   |
| 40 | SD11700 | Abrasion of flank, infected                                  |
| 41 | SD11800 | Abrasion of groin, infected                                  |
| 42 | SD11900 | Abrasion of perineum, infected                               |
| 43 | SD11A00 | Abrasion of penis, infected                                  |
| 44 | SD11B00 | Abrasion of scrotum and testis, infected                     |
| 45 | SD11B11 | Abrasion or friction burn of scrotum, infected               |
| 46 | SD11B12 | Abrasion or friction burn of testis, infected                |
| 47 | SD11C00 | Abrasion of vulva, infected                                  |
| 48 | SD11z00 | Abrasion or friction burn of trunk, infected, NOS            |
| 49 | SD13.00 | Blister of trunk, infected                                   |
| 50 | SD13000 | Blister of interscapular region, infected                    |
| 51 | SD13100 | Blister of chest wall, infected                              |
| 52 |         |                                                              |
| 53 |         |                                                              |
| 54 |         |                                                              |
| 55 |         |                                                              |
| 56 |         |                                                              |
| 57 |         |                                                              |
| 58 |         |                                                              |
| 59 |         |                                                              |
| 60 |         |                                                              |



|    |         |                                                             |
|----|---------|-------------------------------------------------------------|
| 1  |         |                                                             |
| 2  | SD13200 | Blister of breast, infected                                 |
| 3  | SD13300 | Blister of abdominal wall, infected                         |
| 4  | SD13400 | Blister of back, infected                                   |
| 5  | SD13500 | Blister of buttock, infected                                |
| 6  | SD13600 | Blister of anus, infected                                   |
| 7  | SD13700 | Blister of flank, infected                                  |
| 8  | SD13800 | Blister of groin, infected                                  |
| 9  | SD13900 | Blister of perineum, infected                               |
| 10 | SD13A00 | Blister of penis, infected                                  |
| 11 | SD13B00 | Blister of scrotum and testis, infected                     |
| 12 | SD13B11 | Blister of scrotum, infected                                |
| 13 | SD13B12 | Blister of testis, infected                                 |
| 14 | SD13C00 | Blister of vulva, infected                                  |
| 15 | SD13D00 | Blister of vagina, infected                                 |
| 16 | SD13z00 | Blister of trunk, infected, NOS                             |
| 17 | SD15.00 | Insect bite, nonvenomous, of trunk, infected                |
| 18 | SD15000 | Insect bite, nonvenomous, of interscapular region, infected |
| 19 | SD15100 | Insect bite, nonvenomous, of chest wall, infected           |
| 20 | SD15200 | Insect bite, nonvenomous, of breast, infected               |
| 21 | SD15300 | Insect bite, nonvenomous, of abdominal wall, infected       |
| 22 | SD15400 | Insect bite, nonvenomous, of back, infected                 |
| 23 | SD15500 | Insect bite, nonvenomous, of buttock, infected              |
| 24 | SD15600 | Insect bite, nonvenomous, of anus, infected                 |
| 25 | SD15700 | Insect bite, nonvenomous, of flank, infected                |
| 26 | SD15800 | Insect bite, nonvenomous, of groin, infected                |
| 27 | SD15900 | Insect bite, nonvenomous, of perineum, infected             |
| 28 | SD15A00 | Insect bite, nonvenomous, of penis, infected                |
| 29 | SD15B00 | Insect bite, nonvenomous, of scrotum and testis, infected   |
| 30 | SD15B11 | Insect bite, nonvenomous, of scrotum, infected              |
| 31 | SD15B12 | Insect bite, nonvenomous, of testis, infected               |
| 32 | SD15C00 | Insect bite, nonvenomous, of vulva, infected                |
| 33 | SD15D00 | Insect bite, nonvenomous, of vagina, infected               |
| 34 | SD15z00 | Insect bite, nonvenomous, of trunk, infected, NOS           |
| 35 | SD1z.00 | Superficial injury of trunk NOS, infected                   |
| 36 | SD1z000 | Superficial injury of interscapular region NOS, infected    |
| 37 | SD1z100 | Superficial injury of chest wall NOS, infected              |
| 38 | SD1z200 | Superficial injury of breast NOS, infected                  |
| 39 | SD1z300 | Superficial injury of abdominal wall NOS, infected          |
| 40 | SD1z400 | Superficial injury of back NOS, infected                    |
| 41 | SD1z500 | Superficial injury of buttock NOS, infected                 |
| 42 | SD1z600 | Superficial injury of anus NOS, infected                    |
| 43 | SD1z700 | Superficial injury of flank NOS, infected                   |
| 44 | SD1z800 | Superficial injury of groin NOS, infected                   |
| 45 | SD1z900 | Superficial injury of perineum NOS, infected                |
| 46 | SD1zA00 | Superficial injury of penis NOS, infected                   |
| 47 | SD1zB00 | Superficial injury of scrotum and testis NOS, infected      |
| 48 | SD1zC00 | Superficial injury of vulva NOS, infected                   |
| 49 | SD1z00  | Superficial injury of trunk NOS, infection NOS              |
| 50 | SD21.00 | Abrasion or friction burn of shoulder/upper arm, infected   |
| 51 | SD21000 | Abrasion of shoulder, infected                              |
| 52 |         |                                                             |
| 53 |         |                                                             |
| 54 |         |                                                             |
| 55 |         |                                                             |
| 56 |         |                                                             |
| 57 |         |                                                             |
| 58 |         |                                                             |
| 59 |         |                                                             |
| 60 |         |                                                             |

|    |                                                                     |
|----|---------------------------------------------------------------------|
| 1  |                                                                     |
| 2  | SD21100 Abrasion of scapular region, infected                       |
| 3  | SD21200 Abrasion of axilla, infected                                |
| 4  | SD21300 Abrasion of upper arm, infected                             |
| 5  | SD21z00 Abrasion or friction burn shoulder/upper arm, infected, NOS |
| 6  | SD23.00 Blister of shoulder and upper arm, infected                 |
| 7  | SD23000 Blister of shoulder, infected                               |
| 8  | SD23100 Blister of scapular region, infected                        |
| 9  | SD23200 Blister of axilla, infected                                 |
| 10 | SD23300 Blister of upper arm, infected                              |
| 11 | SD23z00 Blister of shoulder and upper arm, infected, NOS            |
| 12 | SD25.00 Insect bite, nonvenomous, of shoulder/upper arm, infected   |
| 13 | SD25000 Insect bite, nonvenomous, of shoulder, infected             |
| 14 | SD25100 Insect bite, nonvenomous, of interscapular region, infected |
| 15 | SD25200 Insect bite, nonvenomous, of axilla, infected               |
| 16 | SD25300 Insect bite, nonvenomous, of upper arm, infected            |
| 17 | SD25z00 Insect bite, nonvenomous, shoulder/upper arm, infected, NOS |
| 18 | SD2z.00 Superficial injury of shoulder and upper arm NOS, infected  |
| 19 | SD2z000 Superficial injury of shoulder NOS, infected                |
| 20 | SD2z100 Superficial injury of scapular region NOS, infected         |
| 21 | SD2z200 Superficial injury of axilla NOS, infected                  |
| 22 | SD2z300 Superficial injury of upper arm NOS, infected               |
| 23 | SD2zz00 Superficial injury shoulder/upper arm, infection NOS        |
| 24 | SD31.00 Abrasion or friction burn of lower arm, infected            |
| 25 | SD31000 Abrasion of elbow, infected                                 |
| 26 | SD31100 Abrasion of forearm, infected                               |
| 27 | SD31200 Abrasion of wrist, infected                                 |
| 28 | SD31z00 Abrasion or friction burn of lower arm, infected, NOS       |
| 29 | SD33.00 Blister of lower arm, infected                              |
| 30 | SD33000 Blister of elbow, infected                                  |
| 31 | SD33100 Blister of forearm, infected                                |
| 32 | SD33200 Blister of wrist, infected                                  |
| 33 | SD33z00 Blister of lower arm, infected, NOS                         |
| 34 | SD35.00 Insect bite, nonvenomous, of lower arm, infected            |
| 35 | SD35000 Insect bite, nonvenomous, of elbow, infected                |
| 36 | SD35100 Insect bite, nonvenomous, of forearm, infected              |
| 37 | SD35200 Insect bite, nonvenomous, of wrist, infected                |
| 38 | SD35z00 Insect bite, nonvenomous, of lower arm, infected, NOS       |
| 39 | SD3z.00 Superficial injury of lower arm NOS, infected               |
| 40 | SD3z000 Superficial injury of elbow NOS, infected                   |
| 41 | SD3z100 Superficial injury of forearm NOS, infected                 |
| 42 | SD3z200 Superficial injury of wrist NOS, infected                   |
| 43 | SD3zz00 Superficial injury of lower arm, infected NOS               |
| 44 | SD41.00 Abrasion or friction burn of hand, infected                 |
| 45 | SD43.00 Blister of hand, infected                                   |
| 46 | SD45.00 Insect bite, nonvenomous, of hand, infected                 |
| 47 | SD4z.00 Superficial injury of hand NOS, infected                    |
| 48 | SD51.00 Abrasion or friction burn of finger, infected               |
| 49 | SD53.00 Blister of finger, infected                                 |
| 50 | SD55.00 Insect bite, nonvenomous, of finger, infected               |
| 51 | SD5z.00 Superficial injury of finger NOS, infected                  |
| 52 |                                                                     |
| 53 |                                                                     |
| 54 |                                                                     |
| 55 |                                                                     |
| 56 |                                                                     |
| 57 |                                                                     |
| 58 |                                                                     |
| 59 |                                                                     |
| 60 |                                                                     |

|    |         |                                                          |
|----|---------|----------------------------------------------------------|
| 1  |         |                                                          |
| 2  | SD61.00 | Abrasion or friction burn of lower limb, infected        |
| 3  | SD61.11 | Abrasion or friction burn of leg, infected               |
| 4  | SD61000 | Abrasion of hip, infected                                |
| 5  | SD61100 | Abrasion of thigh, infected                              |
| 6  | SD61200 | Abrasion of knee, infected                               |
| 7  | SD61300 | Abrasion of lower leg, infected                          |
| 8  | SD61400 | Abrasion of ankle, infected                              |
| 9  |         |                                                          |
| 10 | SD61z00 | Abrasion or friction burn of lower limb, infected, NOS   |
| 11 | SD63.00 | Blister of lower limb, infected                          |
| 12 | SD63.11 | Blister of leg, infected                                 |
| 13 |         |                                                          |
| 14 | SD63000 | Blister of hip, infected                                 |
| 15 | SD63100 | Blister of thigh, infected                               |
| 16 | SD63200 | Blister of knee, infected                                |
| 17 | SD63300 | Blister of lower leg, infected                           |
| 18 | SD63400 | Blister of ankle, infected                               |
| 19 |         |                                                          |
| 20 | SD63z00 | Blister of lower limb, infected, NOS                     |
| 21 | SD65.00 | Insect bite, nonvenomous, of lower limb, infected        |
| 22 | SD65.11 | Insect bite, nonvenomous, of leg, infected               |
| 23 |         |                                                          |
| 24 | SD65000 | Insect bite, nonvenomous, of hip, infected               |
| 25 | SD65100 | Insect bite, nonvenomous, of thigh, infected             |
| 26 | SD65200 | Insect bite, nonvenomous, of knee, infected              |
| 27 | SD65300 | Insect bite, nonvenomous, of lower leg, infected         |
| 28 | SD65400 | Insect bite, nonvenomous, of ankle, infected             |
| 29 |         |                                                          |
| 30 | SD65z00 | Insect bite, nonvenomous, of lower limb, infected, NOS   |
| 31 | SD6z.00 | Superficial injury of lower limb, infected               |
| 32 | SD6z000 | Superficial injury of hip NOS, infected                  |
| 33 | SD6z100 | Superficial injury of thigh NOS, infected                |
| 34 | SD6z200 | Superficial injury of knee NOS, infected                 |
| 35 | SD6z300 | Superficial injury of lower leg NOS, infected            |
| 36 | SD6z400 | Superficial injury of ankle NOS, infected                |
| 37 |         |                                                          |
| 38 | SD6zz00 | Superficial injury of lower limb, infected, NOS          |
| 39 | SD71.00 | Abrasion or friction burn of foot and toe, infected      |
| 40 | SD71.11 | Abrasion or friction burn of heel, infected              |
| 41 | SD71.12 | Abrasion or friction burn of toenail, infected           |
| 42 |         |                                                          |
| 43 | SD71000 | Abrasion of foot, infected                               |
| 44 | SD71100 | Abrasion of toe, infected                                |
| 45 | SD71z00 | Abrasion or friction burn of foot and toe, infected, NOS |
| 46 | SD73.00 | Blister of foot and toe, infected                        |
| 47 | SD73.11 | Blister of heel, infected                                |
| 48 |         |                                                          |
| 49 | SD73000 | Blister of foot, infected                                |
| 50 | SD73100 | Blister of toe, infected                                 |
| 51 | SD73z00 | Blister of foot and toe, infected, NOS                   |
| 52 | SD75.00 | Insect bite, nonvenomous, of foot and toe, infected      |
| 53 | SD75.11 | Insect bite, nonvenomous, of heel, infected              |
| 54 |         |                                                          |
| 55 | SD75000 | Insect bite, nonvenomous, of foot, infected              |
| 56 | SD75100 | Insect bite, nonvenomous, of toe, infected               |
| 57 | SD75z00 | Insect bite, nonvenomous, of foot and toe, infected, NOS |
| 58 | SD7z.00 | Superficial injury of foot and toe NOS, infected         |
| 59 | SD7z000 | Superficial injury of foot NOS, infected                 |
| 60 | SD7z100 | Superficial injury of toe NOS, infected                  |

|    |         |                                                              |
|----|---------|--------------------------------------------------------------|
| 1  |         |                                                              |
| 2  | SD7zz00 | Superficial injury of foot and toe, infected, NOS            |
| 3  | SD91.00 | Abrasion or friction burn, infected, NOS                     |
| 4  | SD95.00 | Insect bite, nonvenomous, infected, NOS                      |
| 5  | SD96000 | Foreign body in skin wound                                   |
| 6  | SD99.00 | Tick bite, infected                                          |
| 7  | SD9z.00 | Other superficial injury, infected, NOS                      |
| 8  | SH...00 | Burns                                                        |
| 9  | SH1..00 | Burn of the face, head or neck                               |
| 10 | SH1..11 | Face burns                                                   |
| 11 | SH1..12 | Head burns                                                   |
| 12 | SH10.00 | Unspecified thickness burn of the face, head or neck         |
| 13 | SH10000 | Unspecified thickness burn of unspecified part of face/head  |
| 14 | SH10100 | Unspecified thickness burn of the ear                        |
| 15 | SH10200 | Unspecified thickness burn of the eye                        |
| 16 | SH10300 | Unspecified thickness burn of the lip(s)                     |
| 17 | SH10400 | Unspecified thickness burn of the chin                       |
| 18 | SH10500 | Unspecified thickness burn of the nose                       |
| 19 | SH10600 | Unspecified thickness burn of the scalp                      |
| 20 | SH10700 | Unspecified thickness burn of the forehead                   |
| 21 | SH10800 | Unspecified thickness burn of the cheek                      |
| 22 | SH10900 | Unspecified thickness burn of the neck                       |
| 23 | SH10x00 | Unspecified thickness burn multiple sites face, head or neck |
| 24 | SH10z00 | Unspecified thickness burn of the face, head or neck NOS     |
| 25 | SH11.00 | Superficial burn of the face, head or neck                   |
| 26 | SH11.11 | Erythema of head or neck, first degree burn                  |
| 27 | SH11000 | Superficial burn of unspecified part of the face or head     |
| 28 | SH11100 | Superficial burn of the ear                                  |
| 29 | SH11200 | Superficial burn of the eye                                  |
| 30 | SH11300 | Superficial burn of the lip(s)                               |
| 31 | SH11400 | Superficial burn of the chin                                 |
| 32 | SH11500 | Superficial burn of the nose                                 |
| 33 | SH11600 | Superficial burn of the scalp                                |
| 34 | SH11700 | Superficial burn of the forehead                             |
| 35 | SH11800 | Superficial burn of the cheek                                |
| 36 | SH11900 | Superficial burn of the neck                                 |
| 37 | SH11x00 | Superficial burn of multiple sites of the face, head or neck |
| 38 | SH11z00 | Superficial burn of the face, head or neck NOS               |
| 39 | SH12.00 | Partial thickness burn of the face, head or neck             |
| 40 | SH12.11 | Blister of face, head and neck, second degree burn           |
| 41 | SH12000 | Superficial part. thickness burn unspecified part face/head  |
| 42 | SH12100 | Superficial partial thickness burn of the ear                |
| 43 | SH12111 | Ear - 2nd degree burn                                        |
| 44 | SH12200 | Superficial partial thickness burn of the eye                |
| 45 | SH12211 | Eye - 2nd degree burn                                        |
| 46 | SH12300 | Superficial partial thickness burn of the lip(s)             |
| 47 | SH12311 | Lip - 2nd degree burn                                        |
| 48 | SH12400 | Superficial partial thickness burn of the chin               |
| 49 | SH12411 | Chin - 2nd degree burn                                       |
| 50 | SH12500 | Superficial partial thickness burn of the nose               |
| 51 | SH12511 | Nose - 2nd degree burn                                       |
| 52 |         |                                                              |
| 53 |         |                                                              |
| 54 |         |                                                              |
| 55 |         |                                                              |
| 56 |         |                                                              |
| 57 |         |                                                              |
| 58 |         |                                                              |
| 59 |         |                                                              |
| 60 |         |                                                              |

|    |         |                                                              |
|----|---------|--------------------------------------------------------------|
| 1  |         |                                                              |
| 2  | SH12600 | Superficial partial thickness burn of the scalp              |
| 3  | SH12611 | Scalp - 2nd degree burn                                      |
| 4  | SH12700 | Superficial partial thickness burn of the forehead           |
| 5  | SH12711 | Forehead - 2nd degree burn                                   |
| 6  | SH12800 | Superficial partial thickness burn of the cheek              |
| 7  | SH12811 | Cheek - 2nd degree burn                                      |
| 8  | SH12900 | Superficial partial thickness burn of the neck               |
| 9  | SH12911 | Neck - 2nd degree burn                                       |
| 10 |         |                                                              |
| 11 | SH12A00 | Deep partial thickness burn of unspecified part of face/head |
| 12 | SH12B00 | Deep partial thickness burn of the ear                       |
| 13 | SH12C00 | Deep partial thickness burn of the eye                       |
| 14 | SH12D00 | Deep partial thickness burn of the lip(s)                    |
| 15 | SH12E00 | Deep partial thickness burn of the chin                      |
| 16 | SH12F00 | Deep partial thickness burn of the nose                      |
| 17 | SH12G00 | Deep partial thickness burn of the scalp                     |
| 18 | SH12H00 | Deep partial thickness burn of the forehead                  |
| 19 | SH12J00 | Deep partial thickness burn of the cheek                     |
| 20 | SH12K00 | Deep partial thickness burn of the neck                      |
| 21 | SH12x00 | Partial thickness burn of multiple sites face, head or neck  |
| 22 | SH12z00 | Partial thickness burn of the face, head or neck NOS         |
| 23 | SH13.00 | Full thickness burn of the face, head or neck                |
| 24 | SH13000 | Full thickness burn of unspecified part of the face or head  |
| 25 | SH13100 | Full thickness burn of the ear                               |
| 26 | SH13200 | Full thickness burn of the eye                               |
| 27 | SH13300 | Full thickness burn of the lip(s)                            |
| 28 | SH13400 | Full thickness burn of the chin                              |
| 29 | SH13500 | Full thickness burn of the nose                              |
| 30 | SH13600 | Full thickness burn of the scalp                             |
| 31 | SH13700 | Full thickness burn of the forehead                          |
| 32 | SH13800 | Full thickness burn of the cheek                             |
| 33 | SH13900 | Full thickness burn of the neck                              |
| 34 | SH13A00 | Corrosion of third degree of head and neck                   |
| 35 | SH13x00 | Full thickness burn of multiple sites of face, head or neck  |
| 36 | SH13z00 | Full thickness burn of the face, head or neck NOS            |
| 37 | SH14.00 | Deep full thick burn face/head/neck - without loss body part |
| 38 | SH14000 | Deep full thick burn unspec.part face/head-no loss body part |
| 39 | SH14100 | Deep full thickness burn of ear without loss of body part    |
| 40 | SH14200 | Deep full thickness burn of eye without loss of body part    |
| 41 | SH14300 | Deep full thickness burn of lip(s) without loss of body part |
| 42 | SH14400 | Deep full thickness burn of chin without loss of body part   |
| 43 | SH14500 | Deep full thickness burn of nose without loss of body part   |
| 44 | SH14600 | Deep full thickness burn of scalp without loss of body part  |
| 45 | SH14700 | Deep full thickness burn forehead without loss of body part  |
| 46 | SH14800 | Deep full thickness burn of cheek without loss of body part  |
| 47 | SH14900 | Deep full thickness burn of neck without loss of body part   |
| 48 | SH14x00 | Deep full thickness burn multip sites face/head/neck- no BPL |
| 49 | SH14z00 | Deep full thick burn, no loss body part, face/head/neck NOS  |
| 50 | SH15.00 | Deep full thick burn face/head/neck, with loss of body part  |
| 51 | SH15000 | Deep full thickness burn unspec part of face/head, with BPL  |
| 52 | SH15100 | Deep full thickness burn of the ear, with loss of body part  |
| 53 |         |                                                              |
| 54 |         |                                                              |
| 55 |         |                                                              |
| 56 |         |                                                              |
| 57 |         |                                                              |
| 58 |         |                                                              |
| 59 |         |                                                              |
| 60 |         |                                                              |

|    |         |                                                              |
|----|---------|--------------------------------------------------------------|
| 1  |         |                                                              |
| 2  | SH15200 | Deep full thickness burn of the eye, with loss of body part  |
| 3  | SH15300 | Deep full thickness burn of lip(s), with loss of body part   |
| 4  | SH15400 | Deep full thickness burn of the chin, with loss of body part |
| 5  | SH15500 | Deep full thickness burn of the nose, with loss of body part |
| 6  | SH15600 | Deep full thickness burn of scalp, with loss of body part    |
| 7  | SH15700 | Deep full thickness burn of forehead, with loss of body part |
| 8  | SH15800 | Deep full thickness burn of cheek, with loss of body part    |
| 9  | SH15900 | Deep full thickness burn of the neck, with loss of body part |
| 10 | SH15x00 | Deep full thick burn multip parts face/head/neck - with BPL  |
| 11 | SH15z00 | Deep full thick burn, with loss body part,face/head/neck NOS |
| 12 | SH16.00 | Corrosion of head and neck                                   |
| 13 | SH16000 | Corrosion of first degree of head and neck                   |
| 14 | SH16100 | Corrosion of second degree of head and neck                  |
| 15 | SH1z.00 | Burn of the face, head or neck NOS                           |
| 16 | SH2..00 | Burn of the trunk                                            |
| 17 | SH20.00 | Unspecified thickness burn of the trunk                      |
| 18 | SH20000 | Unspecified thickness burn of unspecified part of the trunk  |
| 19 | SH20100 | Unspecified thickness burn of the breast                     |
| 20 | SH20200 | Unspecified thickness burn of the chest wall                 |
| 21 | SH20300 | Unspecified thickness burn of the abdominal wall             |
| 22 | SH20400 | Unspecified thickness burn of the back (excluding buttock)   |
| 23 | SH20500 | Unspecified thickness burn of the buttock                    |
| 24 | SH20600 | Unspecified thickness burn of the genitalia                  |
| 25 | SH20x00 | Unspecified thickness burn of multiple sites of the trunk    |
| 26 | SH20z00 | Unspecified thickness burn of the trunk NOS                  |
| 27 | SH21.00 | Superficial burn of the trunk                                |
| 28 | SH21.11 | Erythema of trunk, 1st degree burn                           |
| 29 | SH21000 | Superficial burn of unspecified part of the trunk            |
| 30 | SH21100 | Superficial burn of the breast                               |
| 31 | SH21200 | Superficial burn of the chest wall                           |
| 32 | SH21300 | Superficial burn of the abdominal wall                       |
| 33 | SH21400 | Superficial burn of the back (excluding buttock)             |
| 34 | SH21500 | Superficial burn of the buttock                              |
| 35 | SH21600 | Superficial burn of the genitalia                            |
| 36 | SH21700 | Corrosion of first degree of trunk                           |
| 37 | SH21x00 | Superficial burn of multiple sites of the trunk              |
| 38 | SH21z00 | Superficial burn of the trunk NOS                            |
| 39 | SH22.00 | Partial thickness burn of the trunk                          |
| 40 | SH22.11 | Blister of trunk, second degree burn                         |
| 41 | SH22000 | Superficial partial thickness burn unspecified part of trunk |
| 42 | SH22100 | Superficial partial thickness burn of the breast             |
| 43 | SH22200 | Superficial partial thickness burn of the chest wall         |
| 44 | SH22300 | Superficial partial thickness burn of the abdominal wall     |
| 45 | SH22400 | Superficial partial thickness burn of back (excl buttock)    |
| 46 | SH22500 | Superficial partial thickness burn of the buttock            |
| 47 | SH22600 | Superficial partial thickness burn of the genitalia          |
| 48 | SH22700 | Deep partial thickness burn of the trunk, unspecified        |
| 49 | SH22800 | Deep partial thickness burn of the breast                    |
| 50 | SH22900 | Deep partial thickness burn of the chest wall                |
| 51 | SH22A00 | Deep partial thickness burn of the abdominal wall            |
| 52 |         |                                                              |
| 53 |         |                                                              |
| 54 |         |                                                              |
| 55 |         |                                                              |
| 56 |         |                                                              |
| 57 |         |                                                              |
| 58 |         |                                                              |
| 59 |         |                                                              |
| 60 |         |                                                              |



|    |         |                                                              |
|----|---------|--------------------------------------------------------------|
| 1  |         |                                                              |
| 2  | SH22B00 | Deep partial thickness burn of the back (excluding buttock)  |
| 3  | SH22C00 | Deep partial thickness burn of the buttock                   |
| 4  | SH22D00 | Deep partial thickness burn of the genitalia                 |
| 5  | SH22E00 | Corrosion of second degree of trunk                          |
| 6  | SH22x00 | Partial thickness burn of multiple sites of the trunk        |
| 7  | SH22z00 | Partial thickness burn of the trunk NOS                      |
| 8  | SH23.00 | Full thickness burn of the trunk                             |
| 9  | SH23000 | Full thickness burn of the trunk, unspecified                |
| 10 | SH23100 | Full thickness burn of the breast                            |
| 11 | SH23200 | Full thickness burn of the chest wall                        |
| 12 | SH23300 | Full thickness burn of the abdominal wall                    |
| 13 | SH23400 | Full thickness burn of the back (excluding buttock)          |
| 14 | SH23500 | Full thickness burn of the buttock                           |
| 15 | SH23600 | Full thickness burn of the genitalia                         |
| 16 | SH23700 | Corrosion of third degree of trunk                           |
| 17 | SH23x00 | Full thickness burn of multiple sites of the trunk           |
| 18 | SH23z00 | Full thickness burn of the trunk NOS                         |
| 19 | SH24.00 | Deep full thickness burn of trunk without loss of body part  |
| 20 | SH24000 | Deep full thickness burn of trunk unsp, no loss of body part |
| 21 | SH24100 | Deep full thickness burn of breast without loss of body part |
| 22 | SH24200 | Deep full thickness burn of chest without loss of body part  |
| 23 | SH24300 | Deep full thickness burn of abdom.wall, no loss of body part |
| 24 | SH24400 | Deep full thickness burn of back without loss of body part   |
| 25 | SH24500 | Deep full thickness burn of buttock, no loss of body part    |
| 26 | SH24600 | Deep full thickness burn of genitalia, no loss of body part  |
| 27 | SH24x00 | Deep full thickness burn multiple sites trunk, no BPL        |
| 28 | SH24z00 | Deep full thickness burn of trunk, no loss of body part NOS  |
| 29 | SH25.00 | Deep full thickness burn of trunk, with loss of body part    |
| 30 | SH25000 | Deep full thickness burn of trunk unsp, with loss body part  |
| 31 | SH25100 | Deep full thickness burn of breast, with loss of body part   |
| 32 | SH25200 | Deep full thickness burn of chest, with loss of body part    |
| 33 | SH25300 | Deep full thickness burn of abd.wall, with loss of body part |
| 34 | SH25400 | Deep full thickness burn of back, with loss of body part     |
| 35 | SH25500 | Deep full thickness burn of buttock, with loss of body part  |
| 36 | SH25600 | Deep full thickness burn of genitalia, with loss body part   |
| 37 | SH25x00 | Deep full thickness burn multiple sites trunk with BPL       |
| 38 | SH25z00 | Deep full thickness burn of trunk, with loss body part, NOS  |
| 39 | SH26.00 | Corrosion of unspecified degree of trunk                     |
| 40 | SH2z.00 | Burn of the trunk NOS                                        |
| 41 | SH3..00 | Burn of the arm (excluding wrist and hand)                   |
| 42 | SH30.00 | Unspecified thickness burn of the arm                        |
| 43 | SH30000 | Unspecified thickness burn of the arm, unspecified           |
| 44 | SH30100 | Unspecified thickness burn of the forearm                    |
| 45 | SH30200 | Unspecified thickness burn of the elbow                      |
| 46 | SH30300 | Unspecified thickness burn of the upper arm                  |
| 47 | SH30400 | Unspecified thickness burn of the axilla                     |
| 48 | SH30500 | Unspecified thickness burn of the shoulder                   |
| 49 | SH30600 | Unspecified thickness burn of the scapular region            |
| 50 | SH30x00 | Unspecified thickness burn of multiple sites of the arm      |
| 51 | SH30z00 | Unspecified thickness burn of the arm NOS                    |



|    |         |                                                              |
|----|---------|--------------------------------------------------------------|
| 1  |         |                                                              |
| 2  | SH31.00 | Superficial burn of the arm                                  |
| 3  | SH31.11 | Erythema of arm, first degree burn                           |
| 4  | SH31000 | Superficial burn of the arm, unspecified                     |
| 5  | SH31100 | Superficial burn of the forearm                              |
| 6  | SH31200 | Superficial burn of the elbow                                |
| 7  | SH31300 | Superficial burn of the upper arm                            |
| 8  | SH31400 | Superficial burn of the axilla                               |
| 9  | SH31500 | Superficial burn of the shoulder                             |
| 10 | SH31600 | Superficial burn of the scapular region                      |
| 11 | SH31x00 | Superficial burn of multiple sites of the arm                |
| 12 | SH31z00 | Superficial burn of the arm NOS                              |
| 13 | SH32.00 | Partial thickness burn of the arm                            |
| 14 | SH32.11 | Blister of arm, second degree burn                           |
| 15 | SH32000 | Superficial partial thickness burn of the arm, unspecified   |
| 16 | SH32100 | Superficial partial thickness burn of the forearm            |
| 17 | SH32200 | Superficial partial thickness burn of the elbow              |
| 18 | SH32300 | Superficial partial thickness burn of the upper arm          |
| 19 | SH32400 | Superficial partial thickness burn of the axilla             |
| 20 | SH32500 | Superficial partial thickness burn of the shoulder           |
| 21 | SH32600 | Superficial partial thickness burn of scapular region        |
| 22 | SH32700 | Deep partial thickness burn of the arm, unspecified          |
| 23 | SH32800 | Deep partial thickness burn of the forearm                   |
| 24 | SH32900 | Deep partial thickness burn of the elbow                     |
| 25 | SH32A00 | Deep partial thickness burn of the upper arm                 |
| 26 | SH32B00 | Deep partial thickness burn of the axilla                    |
| 27 | SH32C00 | Deep partial thickness burn of the shoulder                  |
| 28 | SH32D00 | Deep partial thickness burn of the scapular region           |
| 29 | SH32x00 | Partial thickness burn of multiple sites of the arm          |
| 30 | SH32z00 | Partial thickness burn of the arm NOS                        |
| 31 | SH33.00 | Full thickness burn of the arm                               |
| 32 | SH33000 | Full thickness burn of the arm, unspecified                  |
| 33 | SH33100 | Full thickness burn of the forearm                           |
| 34 | SH33200 | Full thickness burn of the elbow                             |
| 35 | SH33300 | Full thickness burn of the upper arm                         |
| 36 | SH33400 | Full thickness burn of the axilla                            |
| 37 | SH33500 | Full thickness burn of the shoulder                          |
| 38 | SH33600 | Full thickness burn of the scapular region                   |
| 39 | SH33x00 | Full thickness burn of multiple sites of the arm             |
| 40 | SH33z00 | Full thickness burn of the arm NOS                           |
| 41 | SH34.00 | Deep full thickness burn of arm without loss of body part    |
| 42 | SH34000 | Deep full thickness burn of arm unsp, no loss of body part   |
| 43 | SH34100 | Deep full thickness burn of forearm, no loss of body part    |
| 44 | SH34200 | Deep full thickness burn of elbow without loss of body part  |
| 45 | SH34300 | Deep full thickness burn of upper arm, no loss of body part  |
| 46 | SH34400 | Deep full thickness burn of axilla without loss of body part |
| 47 | SH34500 | Deep full thickness burn of shoulder, no loss of body part   |
| 48 | SH34600 | Deep full thickness burn of scapular, no loss of body part   |
| 49 | SH34x00 | Deep full thickness burn of multiple sites of arm, no BPL    |
| 50 | SH34z00 | Deep full thickness burn without loss of body part-arm NOS   |
| 51 | SH35.00 | Deep full thickness burn of arm, with loss of body part      |
| 52 |         |                                                              |
| 53 |         |                                                              |
| 54 |         |                                                              |
| 55 |         |                                                              |
| 56 |         |                                                              |
| 57 |         |                                                              |
| 58 |         |                                                              |
| 59 |         |                                                              |
| 60 |         |                                                              |

1  
2  
3  
4  
5  
6  
7  
8  
9  
10  
11  
12  
13  
14  
15  
16  
17  
18  
19  
20  
21  
22  
23  
24  
25  
26  
27  
28  
29  
30  
31  
32  
33  
34  
35  
36  
37  
38  
39  
40  
41  
42  
43  
44  
45  
46  
47  
48  
49  
50  
51  
52  
53  
54  
55  
56  
57  
58  
59  
60

|         |                                                              |
|---------|--------------------------------------------------------------|
| SH35000 | Deep full thickness burn of arm unsp, with loss of body part |
| SH35100 | Deep full thickness burn of forearm, with loss of body part  |
| SH35200 | Deep full thickness burn of elbow, with loss of body part    |
| SH35300 | Deep full thickness burn of upper arm,with loss of body part |
| SH35400 | Deep full thickness burn of axilla, with loss of body part   |
| SH35500 | Deep full thickness burn of shoulder, with loss of body part |
| SH35600 | Deep full thickness burn of scapular, with loss of body part |
| SH35x00 | Deep full thickness burn of multiple sites of arm with BPL   |
| SH35z00 | Deep full thickness burn-, with loss of body part-arm NOS    |
| SH36.00 | Corros/unspecf degree/shoulder+upper limb,except wrist+hand  |
| SH36000 | Corrosion/1st degree shoulder+upper limb,except wrist+hand   |
| SH36100 | Corrosion/2nd degree/shoulder and upper limb exc wrist+hand  |
| SH36200 | Corros/third degree/shoulder and upper limb, exc wrist+hand  |
| SH3z.00 | Burn of the arm (excluding wrist and hand) NOS               |
| SH4..00 | Burn of the wrist(s) and hand(s)                             |
| SH40.00 | Unspecified thickness burn of the wrist and hand             |
| SH40.11 | Unspecified degree burn of finger                            |
| SH40.12 | Unspecified degree burn of hand                              |
| SH40.13 | Unspecified degree burn of thumb                             |
| SH40.14 | Unspecified degree burn of wrist                             |
| SH40000 | Unspecified thickness burn of the hand, unspecified          |
| SH40100 | Unspecified thickness burn of a single finger                |
| SH40200 | Unspecified thickness burn of the thumb                      |
| SH40300 | Unspecified thickness burn of more than one finger           |
| SH40400 | Unspecified thickness burn of the thumb and finger(s)        |
| SH40500 | Unspecified thickness burn of the palm of hand               |
| SH40600 | Unspecified thickness burn of the back of hand               |
| SH40700 | Unspecified thickness burn of the wrist                      |
| SH40x00 | Unspecified thickness burn of multiple sites of wrist/hand   |
| SH40z00 | Unspecified thickness burn of the wrist or hand NOS          |
| SH41.00 | Superficial burn of the wrist and hand                       |
| SH41.11 | Erythema of wrist and hand,first degree burn                 |
| SH41.12 | First degree burn of finger                                  |
| SH41.13 | First degree burn of hand                                    |
| SH41.14 | First degree burn of thumb                                   |
| SH41.15 | First degree burn of wrist                                   |
| SH41000 | Superficial burn of the hand, unspecified                    |
| SH41100 | Superficial burn of a single finger                          |
| SH41200 | Superficial burn of the thumb                                |
| SH41300 | Superficial burn of more than one finger                     |
| SH41400 | Superficial burn of the thumb and finger(s)                  |
| SH41500 | Superficial burn of the palm of hand                         |
| SH41600 | Superficial burn of the back of hand                         |
| SH41700 | Superficial burn of the wrist                                |
| SH41x00 | First degree burn of multiple sites of the wrist or hand     |
| SH41z00 | Superficial burn of the wrist or hand NOS                    |
| SH42.00 | Partial thickness burn of the wrist and hand                 |
| SH42.11 | Blister of wrist and hand, second degree burn                |
| SH42.12 | Second degree burn of finger                                 |
| SH42.13 | Second degree burn of hand                                   |

|    |         |                                                               |
|----|---------|---------------------------------------------------------------|
| 1  |         |                                                               |
| 2  | SH42.14 | Second degree burn of thumb                                   |
| 3  | SH42.15 | Second degree burn of wrist                                   |
| 4  | SH42000 | Superficial partial thickness burn of hand, unspecified       |
| 5  | SH42100 | Superficial partial thickness burn of a single finger         |
| 6  | SH42200 | Superficial partial thickness burn of the thumb               |
| 7  | SH42300 | Superficial partial thickness burn of more than one finger    |
| 8  | SH42400 | Superficial partial thickness burn of thumb and finger(s)     |
| 9  | SH42500 | Superficial partial thickness burn of palm of hand            |
| 10 | SH42600 | Superficial partial thickness burn of back of hand            |
| 11 | SH42700 | Superficial partial thickness burn of the wrist               |
| 12 | SH42800 | Deep partial thickness burn of the hand, unspecified          |
| 13 | SH42900 | Deep partial thickness burn of a single finger                |
| 14 | SH42A00 | Deep partial thickness burn of the thumb                      |
| 15 | SH42B00 | Deep partial thickness burn of more than one finger           |
| 16 | SH42C00 | Deep partial thickness burn of the thumb and finger(s)        |
| 17 | SH42D00 | Deep partial thickness burn of the palm of hand               |
| 18 | SH42E00 | Deep partial thickness burn of back of hand                   |
| 19 | SH42F00 | Deep partial thickness burn of wrist                          |
| 20 | SH42x00 | Partial thickness burn of multiple sites of the wrist/hand    |
| 21 | SH42z00 | Partial thickness burn of the wrist or hand NOS               |
| 22 | SH43.00 | Full thickness burn of the wrist and hand                     |
| 23 | SH43.11 | Third degree burn of finger                                   |
| 24 | SH43.12 | Third degree burn of hand                                     |
| 25 | SH43.13 | Third degree burn of thumb                                    |
| 26 | SH43.14 | Third degree burn of wrist                                    |
| 27 | SH43000 | Full thickness burn of the hand, unspecified                  |
| 28 | SH43100 | Full thickness burn of a single finger                        |
| 29 | SH43200 | Full thickness burn of the thumb                              |
| 30 | SH43300 | Full thickness burn of more than one finger                   |
| 31 | SH43400 | Full thickness burn of the thumb and finger(s)                |
| 32 | SH43500 | Full thickness burn of the palm of hand                       |
| 33 | SH43600 | Full thickness burn of the back of hand                       |
| 34 | SH43700 | Full thickness burn of the wrist                              |
| 35 | SH43x00 | Full thickness burn of multiple sites of the wrist or hand    |
| 36 | SH43z00 | Full thickness burn of the wrist or hand NOS                  |
| 37 | SH44.00 | Deep full thickness burn of wrist/hand, no loss of body part  |
| 38 | SH44.11 | Deep third degree burn of finger, without loss of a body part |
| 39 | SH44.12 | Deep third degree burn of hand, without loss of a body part   |
| 40 | SH44.13 | Deep third degree burn of thumb, without loss of a body part  |
| 41 | SH44.14 | Deep third degree burn of wrist, without loss of a body part  |
| 42 | SH44000 | Deep full thickness burn of hand unsp, no loss of body part   |
| 43 | SH44100 | Deep full thickness burn of a finger, no loss of body part    |
| 44 | SH44200 | Deep full thickness burn of thumb without loss of body part   |
| 45 | SH44300 | Deep full thickness burn of >1 finger, no loss of body part   |
| 46 | SH44400 | Deep full thickness burn of thumb+fing, no loss of body part  |
| 47 | SH44500 | Deep full thickness burn of palm hand, no loss of body part   |
| 48 | SH44600 | Deep full thickness burn of back hand, no loss of body part   |
| 49 | SH44700 | Deep full thickness burn of wrist without loss of body part   |
| 50 | SH44x00 | Deep full thickness burn-multiple sites wrist/hand, no BPL    |
| 51 | SH44z00 | Deep full thickness burn of wrist/hand, no loss body part NOS |
| 52 |         |                                                               |
| 53 |         |                                                               |
| 54 |         |                                                               |
| 55 |         |                                                               |
| 56 |         |                                                               |
| 57 |         |                                                               |
| 58 |         |                                                               |
| 59 |         |                                                               |
| 60 |         |                                                               |

|    |         |                                                              |
|----|---------|--------------------------------------------------------------|
| 1  |         |                                                              |
| 2  | SH45.00 | Deep full thickness burn of wrist/hand, with loss body part  |
| 3  | SH45.11 | Deep third degree burn of finger with loss of a body part    |
| 4  | SH45.12 | Deep third degree burn of hand with loss of a body part      |
| 5  | SH45.13 | Deep third degree burn of thumb with loss of a body part     |
| 6  | SH45.14 | Deep third degree burn of wrist with loss of a body part     |
| 7  | SH45000 | Deep full thickness burn of hand unsp, with loss body part   |
| 8  | SH45100 | Deep full thickness burn of a finger, with loss of body part |
| 9  | SH45200 | Deep full thickness burn of thumb, with loss of body part    |
| 10 | SH45300 | Deep full thickness burn of >1 finger, with loss body part   |
| 11 | SH45400 | Deep full thickness burn of thumb+fing, with loss body part  |
| 12 | SH45500 | Deep full thickness burn of palm hand, with loss body part   |
| 13 | SH45600 | Deep full thickness burn of back hand, with loss body part   |
| 14 | SH45700 | Deep full thickness burn of wrist, with loss of body part    |
| 15 | SH45x00 | Deep full thickness burn-multiple sites wrist/hand with BPL  |
| 16 | SH45z00 | Deep full thickness burn wrist/hand, with loss body part NOS |
| 17 | SH46.00 | Corrosion of wrist and hand                                  |
| 18 | SH46000 | Corrosion of first degree of wrist and hand                  |
| 19 | SH46100 | Corrosion of second degree of wrist and hand                 |
| 20 | SH46200 | Corrosion of third degree of wrist and hand                  |
| 21 | SH4z.00 | Burn of wrist or hand NOS                                    |
| 22 | SH5..00 | Burn of lower limbs                                          |
| 23 | SH5..11 | Leg burns                                                    |
| 24 | SH50.00 | Unspecified thickness burn of the leg                        |
| 25 | SH50000 | Unspecified degree burn of the leg, unspecified              |
| 26 | SH50100 | Unspecified thickness burn of the toe(s)                     |
| 27 | SH50200 | Unspecified thickness burn of the foot                       |
| 28 | SH50300 | Unspecified thickness burn of the ankle                      |
| 29 | SH50400 | Unspecified thickness burn of the lower leg                  |
| 30 | SH50500 | Unspecified thickness burn of the knee                       |
| 31 | SH50600 | Unspecified thickness burn of the thigh                      |
| 32 | SH50x00 | Unspecified thickness burn of multiple sites of the leg      |
| 33 | SH50z00 | Unspecified thickness burn of the leg NOS                    |
| 34 | SH51.00 | Superficial burn of the leg                                  |
| 35 | SH51.11 | Erythema of leg, first degree burn                           |
| 36 | SH51000 | Superficial burn of the leg, unspecified                     |
| 37 | SH51100 | Superficial burn of the toe(s)                               |
| 38 | SH51200 | Superficial burn of the foot                                 |
| 39 | SH51300 | Superficial burn of the ankle                                |
| 40 | SH51400 | Superficial burn of the lower leg                            |
| 41 | SH51500 | Superficial burn of the knee                                 |
| 42 | SH51600 | Superficial burn of the thigh                                |
| 43 | SH51x00 | Superficial burn of multiple sites of the leg                |
| 44 | SH51z00 | Superficial burn of the leg NOS                              |
| 45 | SH52.00 | Partial thickness burn of the leg                            |
| 46 | SH52.11 | Blister of leg, second degree burn                           |
| 47 | SH52000 | Superficial partial thickness burn of the leg, unspecified   |
| 48 | SH52100 | Superficial partial thickness burn of the toe(s)             |
| 49 | SH52200 | Superficial partial thickness burn of the foot               |
| 50 | SH52300 | Superficial partial thickness burn of the ankle              |
| 51 | SH52400 | Superficial partial thickness burn of the lower leg          |
| 52 |         |                                                              |
| 53 |         |                                                              |
| 54 |         |                                                              |
| 55 |         |                                                              |
| 56 |         |                                                              |
| 57 |         |                                                              |
| 58 |         |                                                              |
| 59 |         |                                                              |
| 60 |         |                                                              |

|    |         |                                                               |
|----|---------|---------------------------------------------------------------|
| 1  |         |                                                               |
| 2  | SH52500 | Superficial partial thickness burn of the knee                |
| 3  | SH52600 | Superficial partial thickness burn of the thigh               |
| 4  | SH52700 | Deep partial thickness burn of the leg, unspecified           |
| 5  | SH52800 | Deep partial thickness burn of the toe(s)                     |
| 6  | SH52900 | Deep partial thickness burn of the foot                       |
| 7  | SH52A00 | Deep partial thickness burn of the ankle                      |
| 8  | SH52B00 | Deep partial thickness burn of the lower leg                  |
| 9  | SH52C00 | Deep partial thickness burn of the knee                       |
| 10 | SH52D00 | Deep partial thickness burn of the thigh                      |
| 11 | SH52x00 | Partial thickness burn of multiple sites of the leg           |
| 12 | SH52z00 | Partial thickness burn of the leg NOS                         |
| 13 | SH53.00 | Full thickness burn of the leg                                |
| 14 | SH53000 | Full thickness burn of the leg, unspecified                   |
| 15 | SH53100 | Full thickness burn of the toe(s)                             |
| 16 | SH53200 | Full thickness burn of the foot                               |
| 17 | SH53300 | Full thickness burn of the ankle                              |
| 18 | SH53400 | Full thickness burn of the lower leg                          |
| 19 | SH53500 | Full thickness burn of the knee                               |
| 20 | SH53600 | Full thickness burn of the thigh                              |
| 21 | SH53x00 | Full thickness burn of multiple sites of the leg              |
| 22 | SH53z00 | Full thickness burn of the leg NOS                            |
| 23 | SH54.00 | Deep full thickness burn of leg without loss of body part     |
| 24 | SH54000 | Deep full thickness burn of leg unsp, no loss of body part    |
| 25 | SH54100 | Deep full thickness burn of toe(s) without loss of body part  |
| 26 | SH54200 | Deep full thickness burn of foot without loss of body part    |
| 27 | SH54300 | Deep full thickness burn of ankle without loss of body part   |
| 28 | SH54400 | Deep full thickness burn of lower leg without loss of body    |
| 29 | SH54500 | Deep full thickness burn of knee without loss of body part    |
| 30 | SH54600 | Deep full thickness burn of thigh without loss of body part   |
| 31 | SH54x00 | Deep full thickness burn-mult.leg without loss of body part   |
| 32 | SH54z00 | Deep full thickness burn, no loss of body part, of leg NOS    |
| 33 | SH55.00 | Deep full thickness burn of leg, with loss of body part       |
| 34 | SH55000 | Deep full thickness burn of leg unsp, with loss body part     |
| 35 | SH55100 | Deep full thickness burn of toe(s), with loss of body part    |
| 36 | SH55200 | Deep full thickness burn of foot, with loss of body part      |
| 37 | SH55300 | Deep full thickness burn of ankle, with loss of body part     |
| 38 | SH55400 | Deep full thickness burn of lower leg, with loss body part    |
| 39 | SH55500 | Deep full thickness burn of knee, with loss of body part      |
| 40 | SH55600 | Deep full thickness burn of thigh, with loss of body part     |
| 41 | SH55x00 | Deep full thickness burn-mult.leg, with loss of body part     |
| 42 | SH55z00 | Deep full thickness burn, with loss of body part, of leg NOS  |
| 43 | SH56.00 | Burn and corrosion of hip and lower limb, except ankle & foot |
| 44 | SH56000 | Corrosion of first degree of hip+lower limb, exc ankle + foot |
| 45 | SH56100 | Corrosion/2nd degree/hip+lower limb, except ankle & foot      |
| 46 | SH56200 | Corrosion/third degree/hip+lower limb except ankle and foot   |
| 47 | SH57.00 | Corrosion of ankle and foot                                   |
| 48 | SH57000 | Corrosion of first degree of ankle and foot                   |
| 49 | SH57100 | Corrosion of second degree of ankle and foot                  |
| 50 | SH57200 | Corrosion of third degree of ankle and foot                   |
| 51 | SH5z.00 | Burn of the lower limb NOS                                    |
| 52 |         |                                                               |
| 53 |         |                                                               |
| 54 |         |                                                               |
| 55 |         |                                                               |
| 56 |         |                                                               |
| 57 |         |                                                               |
| 58 |         |                                                               |
| 59 |         |                                                               |
| 60 |         |                                                               |



|    |         |                                                              |
|----|---------|--------------------------------------------------------------|
| 1  |         |                                                              |
| 2  | SH6..00 | Burn of multiple specified sites                             |
| 3  | SH60.00 | Unspecified thickness burn of multiple specified sites       |
| 4  | SH61.00 | Superficial burn of multiple specified sites                 |
| 5  | SH62.00 | Partial thickness burn of multiple specified sites           |
| 6  | SH62000 | Superficial partial thickness burn multiple specified sites  |
| 7  | SH62100 | Deep partial thickness burn of multiple specified sites      |
| 8  | SH63.00 | Full thickness burn of multiple specified sites              |
| 9  | SH64.00 | Deep full thickness burn multiple specified sites, no BPL    |
| 10 | SH65.00 | Deep full thickness burn multiple specified sites, with BPL  |
| 11 | SH66.00 | Corrosions of multiple regions, unspecified degree           |
| 12 | SH66000 | Corros/multiple reg,no more than first-deg corros mentioned  |
| 13 | SH66100 | Corrosion/multi reg,no more than second-deg corros mentioned |
| 14 | SH66300 | Corros/multi reg,at least one corros/third degree mentioned  |
| 15 | SH6z.00 | Burn of multiple specified sites NOS                         |
| 16 | SH8..00 | Burns as a percentage of body surface (BS) involved          |
| 17 | SH80.00 | Burn involving <10% of body surface (BS)                     |
| 18 | SH80000 | Burn:<10% of body surface, 10%/unspec BS full thickness      |
| 19 | SH80100 | Corrosions involving less than 10% of body surface           |
| 20 | SH80z00 | Burn:<10% of body surface NOS                                |
| 21 | SH81.00 | Burn involving 10-19% of body surface (BS)                   |
| 22 | SH81000 | Burn: 10-14% of body surface,<10%/unsp BS full thickness     |
| 23 | SH81100 | Burn: 10-14% of body surface, 10-14% BS full thickness       |
| 24 | SH81200 | Burn: 15-19% of body surface,<10%/unsp BS full thickness     |
| 25 | SH81300 | Burn: 15-19% of body surface, 10-19% BS full thickness       |
| 26 | SH81400 | Corrosions involving 10-19% of body surface                  |
| 27 | SH81z00 | Burn: 10-19% of body surface NOS                             |
| 28 | SH82.00 | Burn involving 20-29% of body surface (BS)                   |
| 29 | SH82000 | Burn: 20-29% of body surface,<10%/unspec BS full thickness   |
| 30 | SH82100 | Burn: 20-29% of body surface, 10-19% BS full thickness       |
| 31 | SH82200 | Burn: 20-29% of body surface, 20-29% BS full thickness       |
| 32 | SH82300 | Corrosions involving 20-29% of body surface                  |
| 33 | SH82z00 | Burn: 20-29% of body surface NOS                             |
| 34 | SH83.00 | Burn involving 30-39% of body surface (BS)                   |
| 35 | SH83000 | Burn: 30-39% of body surface,<10%/unspec BS full thickness   |
| 36 | SH83100 | Burn: 30-39% of body surface, 10-19% BS full thickness       |
| 37 | SH83200 | Burn: 30-39% of body surface, 20-29% BS full thickness       |
| 38 | SH83300 | Burn: 30-39% of body surface, 30-39% BS full thickness       |
| 39 | SH83400 | Corrosions involving 30-39% of body surface                  |
| 40 | SH83z00 | Burn: 30-39% of body surface NOS                             |
| 41 | SH84.00 | Burn involving 40-49% of body surface (BS)                   |
| 42 | SH84000 | Burn: 40-49% of body surface,<10%/unspec BS full thickness   |
| 43 | SH84100 | Burn: 40-49% of body surface, 10-19% BS full thickness       |
| 44 | SH84200 | Burn: 40-49% of body surface, 20-29% BS full thickness       |
| 45 | SH84300 | Burn: 40-49% of body surface, 30-39% BS full thickness       |
| 46 | SH84400 | Burn: 40-49% of body surface, 40-49% BS full thickness       |
| 47 | SH84500 | Corrosions involving 40-49% of body surface                  |
| 48 | SH84z00 | Burn: 40-49% of body surface NOS                             |
| 49 | SH85.00 | Burn involving 50-59% of body surface (BS)                   |
| 50 | SH85000 | Burn: 50-59% of body surface,<10%/unspec BS full thickness   |
| 51 | SH85100 | Burn: 50-59% of body surface, 10-19% BS full thickness       |
| 52 |         |                                                              |
| 53 |         |                                                              |
| 54 |         |                                                              |
| 55 |         |                                                              |
| 56 |         |                                                              |
| 57 |         |                                                              |
| 58 |         |                                                              |
| 59 |         |                                                              |
| 60 |         |                                                              |

|    |         |                                                             |
|----|---------|-------------------------------------------------------------|
| 1  |         |                                                             |
| 2  | SH85200 | Burn: 50-59% of body surface, 20-29% BS full thickness      |
| 3  | SH85300 | Burn: 50-59% of body surface, 30-39% BS full thickness      |
| 4  | SH85400 | Burn: 50-59% of body surface, 40-49% BS full thickness      |
| 5  | SH85500 | Burn: 50-59% of body surface, 50-59% BS full thickness      |
| 6  | SH85600 | Corrosions involving 50-59% of body surface                 |
| 7  | SH85z00 | Burn: 50-59% of body surface NOS                            |
| 8  | SH86.00 | Burn involving 60-69% of body surface (BS)                  |
| 9  | SH86000 | Burn: 60-69% of body surface, <10%/unspec BS full thickness |
| 10 | SH86100 | Burn: 60-69% of body surface, 10-19% BS full thickness      |
| 11 | SH86200 | Burn: 60-69% of body surface, 20-29% BS full thickness      |
| 12 | SH86300 | Burn: 60-69% of body surface, 30-39% BS full thickness      |
| 13 | SH86400 | Burn: 60-69% of body surface, 40-49% BS full thickness      |
| 14 | SH86500 | Burn: 60-69% of body surface, 50-59% BS full thickness      |
| 15 | SH86600 | Burn: 60-69% of body surface, 60-69% BS full thickness      |
| 16 | SH86700 | Corrosions involving 60-69% of body surface                 |
| 17 | SH86z00 | Burn: 60-69% of body surface NOS                            |
| 18 | SH87.00 | Burn involving 70-79% of body surface (BS)                  |
| 19 | SH87000 | Burn: 70-79% of body surface, <10%/unspec BS full thickness |
| 20 | SH87100 | Burn: 70-79% of body surface, 10-19% BS full thickness      |
| 21 | SH87200 | Burn: 70-79% of body surface, 20-29% BS full thickness      |
| 22 | SH87300 | Burn: 70-79% of body surface, 30-39% BS full thickness      |
| 23 | SH87400 | Burn: 70-79% of body surface, 40-49% BS full thickness      |
| 24 | SH87500 | Burn: 70-79% of body surface, 50-59% BS full thickness      |
| 25 | SH87600 | Burn: 70-79% of body surface, 60-69% BS full thickness      |
| 26 | SH87700 | Burn: 70-79% of body surface, 70-79% BS full thickness      |
| 27 | SH87800 | Corrosions involving 70-79% of body surface                 |
| 28 | SH87z00 | Burn: 70-79% of body surface NOS                            |
| 29 | SH88.00 | Burn involving 80-89% of body surface (BS)                  |
| 30 | SH88000 | Burn: 80-89% of body surface, <10%/unspec BS full thickness |
| 31 | SH88100 | Burn: 80-89% of body surface, 10-19% =full thickness        |
| 32 | SH88200 | Burn: 80-89% of body surface, 20-29% BS full thickness      |
| 33 | SH88300 | Burn: 80-89% of body surface, 30-39% BS full thickness      |
| 34 | SH88400 | Burn: 80-89% of body surface, 40-49% BS full thickness      |
| 35 | SH88500 | Burn: 80-89% of body surface, 50-59% BS full thickness      |
| 36 | SH88600 | Burn: 80-89% of body surface, 60-69% BS full thickness      |
| 37 | SH88700 | Burn: 80-89% of body surface, 70-79% BS full thickness      |
| 38 | SH88800 | Burn: 80-89% of body surface, 80-89% BS full thickness      |
| 39 | SH88900 | Corrosions involving 80-89% of body surface                 |
| 40 | SH88z00 | Burn: 80-89% of body surface, NOS                           |
| 41 | SH89.00 | Burn involving >90% of body surface (BS)                    |
| 42 | SH89000 | Burn: >90% of body surface, <10%/unspec BS full thickness   |
| 43 | SH89100 | Burn: >90% of body surface, 10-19% BS full thickness        |
| 44 | SH89200 | Burn: >90% of body surface, 20-29% BS full thickness        |
| 45 | SH89300 | Burn: >90% of body surface, 30-39% BS full thickness        |
| 46 | SH89400 | Burn: >90% of body surface, 40-49% BS full thickness        |
| 47 | SH89500 | Burn: >90% of body surface, 50-59% BS full thickness        |
| 48 | SH89600 | Burn: >90% of body surface, 60-69% BS full thickness        |
| 49 | SH89700 | Burn: >90% of body surface, 70-79% BS full thickness        |
| 50 | SH89800 | Burn: >90% of body surface, 80-89% BS full thickness        |
| 51 | SH89900 | Burn: >90% of body surface, >90% BS full thickness          |
| 52 |         |                                                             |
| 53 |         |                                                             |
| 54 |         |                                                             |
| 55 |         |                                                             |
| 56 |         |                                                             |
| 57 |         |                                                             |
| 58 |         |                                                             |
| 59 |         |                                                             |
| 60 |         |                                                             |



|    |         |                                                              |
|----|---------|--------------------------------------------------------------|
| 1  |         |                                                              |
| 2  | SH89A00 | Corrosions involving 90% or more of body surface             |
| 3  | SH89z00 | Burn: >90% of body surface NOS                               |
| 4  | SH8z.00 | Burn as a percentage of body surface involved NOS            |
| 5  | SH9..00 | Burn - unspecified                                           |
| 6  | SH90.00 | Unspecified degree of burn NOS                               |
| 7  | SH91.00 | Superficial burn NOS                                         |
| 8  | SH91.11 | First degree burn                                            |
| 9  | SH92.00 | Partial thickness burn NOS                                   |
| 10 | SH92.11 | Second degree burn                                           |
| 11 | SH92000 | Superficial partial thickness burn NOS                       |
| 12 | SH92100 | Deep partial thickness burn NOS                              |
| 13 | SH93.00 | Full thickness burn NOS                                      |
| 14 | SH93.11 | Third degree burn                                            |
| 15 | SH94.00 | Deep full thickness burn, without loss of body part, NOS     |
| 16 | SH95.00 | Deep full thickness burn, with loss of body part, NOS        |
| 17 | SH9z.00 | Burn - unspecified                                           |
| 18 | SHz..00 | Burns NOS                                                    |
| 19 | SK03.00 | Post-traumatic wound infection NEC                           |
| 20 | SK1x200 | Multiple open wounds of neck                                 |
| 21 | SK1x500 | Multiple open wounds of abdomen, lower back and pelvis       |
| 22 | SK1x700 | Multiple open wounds of forearm                              |
| 23 | SK1x800 | Multiple open wounds of lower leg                            |
| 24 | SK1x900 | Open wounds involv thorax with abdomen,lwr back and pelvis   |
| 25 | SK1xA00 | Open wounds invol multi regions of up limb(s) wth lw limb(s) |
| 26 | SP23.00 | Operation wound disruption                                   |
| 27 | SP23000 | Operation wound dehiscence                                   |
| 28 | SP23011 | Postoperative wound breakdown                                |
| 29 | SP23100 | Operation wound rupture                                      |
| 30 | SP23200 | Surgical wound necrosis                                      |
| 31 | SP23300 | Burst abdomen NEC                                            |
| 32 | SP23400 | Breakdown of totally implantable venous access device port   |
| 33 | SP23z00 | Operation wound disruption NOS                               |
| 34 | SP23z11 | Delayed healing surgical wound                               |
| 35 | SP23z12 | Healing delayed surgical wound                               |
| 36 | SP23z13 | Wound surgical healing delayed                               |
| 37 | SP24300 | Foreign body left in wound                                   |
| 38 | SP25000 | Postoperative stitch abscess                                 |
| 39 | SP25100 | Postoperative wound abscess                                  |
| 40 | SP25500 | Postoperative wound infection, unspecified                   |
| 41 | SP25600 | Postoperative wound infection-deep                           |
| 42 | SP25700 | Postoperative wound infection-superficial                    |
| 43 | SP25800 | MRSA infection of postoperative wound                        |
| 44 | SP28.00 | Postoperative wound sinus                                    |
| 45 | SQ...00 | Open wounds involving multiple body regions                  |
| 46 | Syu0200 | [X]Open wound of other parts of head                         |
| 47 | Syu0A00 | [X]Penetrating wound of orbit with or without foreign body   |
| 48 | Syu1300 | [X]Open wound of other parts of the neck                     |
| 49 | Syu1400 | [X]Open wound of neck, part unspecified                      |
| 50 | Syu2500 | [X]Open wound of other parts of thorax                       |
| 51 | Syu2600 | [X]Open wound of thorax, part unspecified                    |
| 52 |         |                                                              |
| 53 |         |                                                              |
| 54 |         |                                                              |
| 55 |         |                                                              |
| 56 |         |                                                              |
| 57 |         |                                                              |
| 58 |         |                                                              |
| 59 |         |                                                              |
| 60 |         |                                                              |

|    |         |                                                              |
|----|---------|--------------------------------------------------------------|
| 1  |         |                                                              |
| 2  | Syu3200 | [X]Open wound of oth and unspecif external genital organs    |
| 3  | Syu3300 | [X]Open wound oth & unspecif part abdomen/lower back/pelvis  |
| 4  | Syu4100 | [X]Open wound of oth & unspecif parts of should & upper arm  |
| 5  | Syu5200 | [X]Open wound of other parts of forearm                      |
| 6  | Syu6200 | [X]Open wound of other parts of wrist and hand               |
| 7  | Syu7100 | [X]Open wound of other parts of hip and thigh                |
| 8  | Syu8200 | [X]Open wound of other parts of lower leg                    |
| 9  | Syu9200 | [X]Open wound of other parts of foot                         |
| 10 | Syu9300 | [X]Open wound of other parts of ankle and foot               |
| 11 | SyuA100 | [X]Open wounds involving other combinations of body regions  |
| 12 | SyuBA00 | [X]Open wound of unspecified body region                     |
| 13 | SyuD.00 | [X]Burns and corrosions                                      |
| 14 | SyuD000 | [X]Burns of other parts of eye and adnexa                    |
| 15 | SyuD800 | [X]Burns of mult reg, at least 1 burn of 3rd deg mentioned   |
| 16 | SyuD900 | [X]Corrosn multi reg, at least 1 corr of 3rd deg mentioned   |
| 17 | SyuJ000 | [X]Post-traumatic wound infection, not elsewhere classified  |
| 18 | TG80000 | Accidental burning/scalding caused by boiling water, unspec  |
| 19 | TG80100 | Accidental burning/scalding caused by boiling liquid, unspec |
| 20 | TG80200 | Accidental burning or scalding caused by liquid metal        |
| 21 | TG80300 | Accidental burning or scalding caused by steam               |
| 22 | TG80400 | Accidental burning/scalding by boiling water from kettle     |
| 23 | TG80500 | Accidental burning/scalding by boiling water from saucepan   |
| 24 | TG80600 | Accidental burning or scalding caused by tea                 |
| 25 | TG80700 | Accidental burning or scalding caused by coffee              |
| 26 | TG80800 | Accidental burning or scalding caused by chocolate           |
| 27 | TG80900 | Accidental burning or scalding caused by milk                |
| 28 | TG80A00 | Accidental burning/scalding caused by soup, stew or curries  |
| 29 | TG80B00 | Accidental burning or scalding caused by fat                 |
| 30 | TG80C00 | Accidental burning or scalding caused by steam from kettle   |
| 31 | TG80D00 | Accidental burning or scalding by steam from car radiator    |
| 32 | TG80y00 | Accidental burning or scalding caused by other hot vapour    |
| 33 | TG80z00 | Accidental burning/scalding caused by hot liquid/vapour NOS  |
| 34 | TGyz700 | Accidental wound NOS                                         |
| 35 | Z174M00 | Pressure area care                                           |
| 36 | Z174M11 | PAC - Pressure area care                                     |
| 37 | Z174N00 | Wound care                                                   |
| 38 | Z174N11 | WOUND TREATMENT                                              |
| 39 | Z174N12 | WOUND THERAPY                                                |
| 40 | Z174O00 | Post-surgical wound care                                     |
| 41 | Z174O11 | Post-operative wound care                                    |
| 42 | Z174P00 | Pressure sore care                                           |
| 43 | Z174Q00 | Skin ulcer care                                              |
| 44 | Z1B..00 | Dressing of skin or wound                                    |
| 45 | Z1B..11 | Application of dressing                                      |
| 46 | Z1B..12 | Dressing                                                     |
| 47 | Z1B1.00 | Attention to dressing of skin                                |
| 48 | Z1B1100 | Checking dressing of skin                                    |
| 49 | Z1B1200 | Checking dressing for leakage                                |
| 50 | Z1B1300 | Change of dressing                                           |
| 51 | Z1B1311 | Repeating dressing                                           |
| 52 |         |                                                              |
| 53 |         |                                                              |
| 54 |         |                                                              |
| 55 |         |                                                              |
| 56 |         |                                                              |
| 57 |         |                                                              |
| 58 |         |                                                              |
| 59 |         |                                                              |
| 60 |         |                                                              |

|    |         |                                         |
|----|---------|-----------------------------------------|
| 1  |         |                                         |
| 2  | Z1B1312 | Reapplying a fresh dressing             |
| 3  | Z1B1313 | Redressing wound                        |
| 4  | Z1B1400 | Attention to dressing of burnt skin     |
| 5  | Z1B2.00 | Dressing of skin                        |
| 6  | Z1B2100 | Dressing of burnt skin                  |
| 7  | Z1B2111 | Burn dressing                           |
| 8  | Z1B2200 | Covering burnt skin with plastic bag    |
| 9  | Z1B2300 | Dressing of skin ulcer                  |
| 10 | Z1B3.00 | Dressing of pressure sore               |
| 11 | Z1O6100 | Exposing wound to air                   |
| 12 | Z1R2.00 | Cleaning wound                          |
| 13 | Z1R2.11 | Cleansing wound                         |
| 14 | Z1R2.12 | Wound toilet                            |
| 15 | Z1R3.00 | Debridement of skin                     |
| 16 | Z1R3.11 | Debridement of wound of skin            |
| 17 | Z1R3.12 | Wound debridement                       |
| 18 | Z1R3.13 | Wound debridement                       |
| 19 | Z1R3100 | Debridement of wound with topical agent |
| 20 | Z1R3200 | Surgical debridement of wound           |
| 21 | Z1R4.00 | Removal of slough from skin             |
| 22 | Z1R4.11 | Desloughing wound                       |
| 23 | Z1R5.00 | Removal of contaminant from skin        |
| 24 | ZA13E00 | Insertion of quill in the nail bed      |
| 25 | ZA14.00 | Ablation of nail bed                    |
| 26 | ZA14.11 | Ablation of nail matrix                 |
| 27 | ZA14100 | Total ablation of nail matrix           |
| 28 | ZA14200 | Partial ablation of nail matrix         |
| 29 | ZQ37.00 | Wound assessment                        |
| 30 | ZQ38.00 | Assessment of fluid loss from wound     |
| 31 | ZQ38.11 | Assessing seepage from wound            |
| 32 | ZQ39.00 | Pressure sore assessment                |
| 33 | ZQ39.11 | Decubitus ulcer assessment              |
| 34 | ZQ39.12 | Pressure ulcer assessment               |
| 35 | ZQ39.13 | Bed sore assessment                     |
| 36 | ZQ3A.00 | Assessment of burn injuries             |
| 37 | ZQ3A.11 | Assessment of levels of burns           |
| 38 | ZR1V.00 | ASEPSIS score for wound infection       |
| 39 | Zw02D00 | [Q] Open fracture grade 1               |
| 40 | Zw02E00 | [Q] Open fracture grade 2               |
| 41 | Zw02F00 | [Q] Open fracture grade 3               |
| 42 | Zw02G00 | [Q] Open fracture grade 3A              |
| 43 | Zw02H00 | [Q] Open fracture grade 3B              |
| 44 | Zw02J00 | [Q] Open fracture grade 3C              |
| 45 | ZX14.00 | Damaging own wounds                     |
| 46 | ZX14300 | Poking fingers into wound               |
| 47 | ZX14400 | Inserting objects into wound            |
| 48 |         |                                         |
| 49 |         |                                         |
| 50 |         |                                         |
| 51 |         |                                         |
| 52 |         |                                         |
| 53 |         |                                         |
| 54 |         |                                         |
| 55 |         |                                         |
| 56 |         |                                         |
| 57 |         |                                         |
| 58 |         |                                         |
| 59 |         |                                         |
| 60 |         |                                         |

**The RECORD statement – checklist of items, extended from the STROBE statement, that should be reported in observational studies using routinely collected health data.**

|                           | Item No. | STROBE items                                                                                                                                                                               | Location in manuscript where items are reported | RECORD items                                                                                                                                                                                                                                                                                                                                                                                                                                | Location in manuscript where items are reported |
|---------------------------|----------|--------------------------------------------------------------------------------------------------------------------------------------------------------------------------------------------|-------------------------------------------------|---------------------------------------------------------------------------------------------------------------------------------------------------------------------------------------------------------------------------------------------------------------------------------------------------------------------------------------------------------------------------------------------------------------------------------------------|-------------------------------------------------|
| <b>Title and abstract</b> |          |                                                                                                                                                                                            |                                                 |                                                                                                                                                                                                                                                                                                                                                                                                                                             |                                                 |
|                           | 1        | (a) Indicate the study's design with a commonly used term in the title or the abstract (b) Provide in the abstract an informative and balanced summary of what was done and what was found | Page 1                                          | RECORD 1.1: The type of data used should be specified in the title or abstract. When possible, the name of the databases used should be included.<br><br>RECORD 1.2: If applicable, the geographic region and timeframe within which the study took place should be reported in the title or abstract.<br><br>RECORD 1.3: If linkage between databases was conducted for the study, this should be clearly stated in the title or abstract. | Page 1<br><br>Page 1<br><br>N/A                 |
| <b>Introduction</b>       |          |                                                                                                                                                                                            |                                                 |                                                                                                                                                                                                                                                                                                                                                                                                                                             |                                                 |
| Background rationale      | 2        | Explain the scientific background and rationale for the investigation being reported                                                                                                       | Page 6                                          |                                                                                                                                                                                                                                                                                                                                                                                                                                             |                                                 |
| Objectives                | 3        | State specific objectives, including any prespecified hypotheses                                                                                                                           | Page 6                                          |                                                                                                                                                                                                                                                                                                                                                                                                                                             |                                                 |
| <b>Methods</b>            |          |                                                                                                                                                                                            |                                                 |                                                                                                                                                                                                                                                                                                                                                                                                                                             |                                                 |
| Study Design              | 4        | Present key elements of study design early in the paper                                                                                                                                    | Page 7                                          |                                                                                                                                                                                                                                                                                                                                                                                                                                             |                                                 |
| Setting                   | 5        | Describe the setting, locations, and relevant dates, including periods of recruitment, exposure, follow-up, and data collection                                                            | Pages 8 and 11                                  |                                                                                                                                                                                                                                                                                                                                                                                                                                             |                                                 |

|                                                                                                                                                                                                            |          |                                                                                                                                                                                                                                                                                                                                                                                                                                                                                                                                                                                                                                                                                                                        |                   |                                                                                                                                                                                                                                                                                                                                                                                                                                                                                                                                                                                                                                                                                                      |                                                                                                                                                                                                                                         |
|------------------------------------------------------------------------------------------------------------------------------------------------------------------------------------------------------------|----------|------------------------------------------------------------------------------------------------------------------------------------------------------------------------------------------------------------------------------------------------------------------------------------------------------------------------------------------------------------------------------------------------------------------------------------------------------------------------------------------------------------------------------------------------------------------------------------------------------------------------------------------------------------------------------------------------------------------------|-------------------|------------------------------------------------------------------------------------------------------------------------------------------------------------------------------------------------------------------------------------------------------------------------------------------------------------------------------------------------------------------------------------------------------------------------------------------------------------------------------------------------------------------------------------------------------------------------------------------------------------------------------------------------------------------------------------------------------|-----------------------------------------------------------------------------------------------------------------------------------------------------------------------------------------------------------------------------------------|
| <p>1<br/>2<br/>3<br/>4<br/>5<br/>6<br/>7<br/>8<br/>9<br/>10<br/>11<br/>12<br/>13<br/>14<br/>15<br/>16<br/>17<br/>18<br/>19<br/>20<br/>21<br/>22<br/>23<br/>24<br/>25<br/>26<br/>27</p> <p>Participants</p> | <p>6</p> | <p>(a) <i>Cohort study</i> - Give the eligibility criteria, and the sources and methods of selection of participants. Describe methods of follow-up<br/> <i>Case-control study</i> - Give the eligibility criteria, and the sources and methods of case ascertainment and control selection. Give the rationale for the choice of cases and controls<br/> <i>Cross-sectional study</i> - Give the eligibility criteria, and the sources and methods of selection of participants</p> <p>(b) <i>Cohort study</i> - For matched studies, give matching criteria and number of exposed and unexposed<br/> <i>Case-control study</i> - For matched studies, give matching criteria and the number of controls per case</p> | <p>Page 8</p>     | <p>RECORD 6.1: The methods of study population selection (such as codes or algorithms used to identify subjects) should be listed in detail. If this is not possible, an explanation should be provided.</p> <p>RECORD 6.2: Any validation studies of the codes or algorithms used to select the population should be referenced. If validation was conducted for this study and not published elsewhere, detailed methods and results should be provided.</p> <p>RECORD 6.3: If the study involved linkage of databases, consider use of a flow diagram or other graphical display to demonstrate the data linkage process, including the number of individuals with linked data at each stage.</p> | <p>2,095 Read codes were used (Supplementary Table S1).</p> <p>Read codes have been used to code symptoms in the NHS since 1985. IQVIA used these codes to identify the patient population independently of the Authors.</p> <p>N/A</p> |
| <p>28<br/>29<br/>30<br/>31<br/>32<br/>33<br/>34</p> <p>Variables</p>                                                                                                                                       | <p>7</p> | <p>Clearly define all outcomes, exposures, predictors, potential confounders, and effect modifiers. Give diagnostic criteria, if applicable.</p>                                                                                                                                                                                                                                                                                                                                                                                                                                                                                                                                                                       | <p>Pages 8-11</p> | <p>RECORD 7.1: A complete list of codes and algorithms used to classify exposures, outcomes, confounders, and effect modifiers should be provided. If these cannot be reported, an explanation should be provided.</p>                                                                                                                                                                                                                                                                                                                                                                                                                                                                               | <p>N/A</p>                                                                                                                                                                                                                              |
| <p>35<br/>36<br/>37<br/>38<br/>39<br/>40<br/>41<br/>42</p> <p>Data sources/<br/>measurement</p>                                                                                                            | <p>8</p> | <p>For each variable of interest, give sources of data and details of methods of assessment (measurement). Describe comparability of assessment methods if there is more than one group</p>                                                                                                                                                                                                                                                                                                                                                                                                                                                                                                                            | <p>Pages 8-11</p> |                                                                                                                                                                                                                                                                                                                                                                                                                                                                                                                                                                                                                                                                                                      |                                                                                                                                                                                                                                         |

|                                                                                                                                              |                                  |    |                                                                                                                                                                                                                                                                                                                                                                                                                                                                                                                                                                      |                                                                                                       |                                                                                                                                                       |                                                   |
|----------------------------------------------------------------------------------------------------------------------------------------------|----------------------------------|----|----------------------------------------------------------------------------------------------------------------------------------------------------------------------------------------------------------------------------------------------------------------------------------------------------------------------------------------------------------------------------------------------------------------------------------------------------------------------------------------------------------------------------------------------------------------------|-------------------------------------------------------------------------------------------------------|-------------------------------------------------------------------------------------------------------------------------------------------------------|---------------------------------------------------|
| 1<br>2<br>3<br>4<br>5<br>6<br>7<br>8<br>9<br>10                                                                                              | Bias                             | 9  | Describe any efforts to address potential sources of bias                                                                                                                                                                                                                                                                                                                                                                                                                                                                                                            | Pages 8-10                                                                                            |                                                                                                                                                       |                                                   |
| 11<br>12<br>13<br>14<br>15<br>16<br>17<br>18<br>19<br>20<br>21<br>22<br>23<br>24<br>25<br>26<br>27<br>28<br>29<br>30<br>31<br>32<br>33<br>34 | Study size                       | 10 | Explain how the study size was arrived at                                                                                                                                                                                                                                                                                                                                                                                                                                                                                                                            | Pages 8-10                                                                                            |                                                                                                                                                       |                                                   |
| 35<br>36<br>37<br>38<br>39<br>40<br>41<br>42<br>43<br>44<br>45<br>46<br>47                                                                   | Quantitative variables           | 11 | Explain how quantitative variables were handled in the analyses. If applicable, describe which groupings were chosen, and why                                                                                                                                                                                                                                                                                                                                                                                                                                        | Pages 8-11                                                                                            |                                                                                                                                                       |                                                   |
|                                                                                                                                              | Statistical methods              | 12 | (a) Describe all statistical methods, including those used to control for confounding<br>(b) Describe any methods used to examine subgroups and interactions<br>(c) Explain how missing data were addressed<br>(d) <i>Cohort study</i> - If applicable, explain how loss to follow-up was addressed<br><i>Case-control study</i> - If applicable, explain how matching of cases and controls was addressed<br><i>Cross-sectional study</i> - If applicable, describe analytical methods taking account of sampling strategy<br>(e) Describe any sensitivity analyses | Pages 9-11<br><br>Pages 9-11<br><br>Page 9-11<br><br>N/A<br><br><br><br><br><br><br><br><br>Page10-11 |                                                                                                                                                       |                                                   |
|                                                                                                                                              | Data access and cleaning methods |    | ..                                                                                                                                                                                                                                                                                                                                                                                                                                                                                                                                                                   |                                                                                                       | RECORD 12.1: Authors should describe the extent to which the investigators had access to the database population used to create the study population. | Authors did not have access to the THIN database. |

|                  |    |                                                                                                                                                                                                                                                                                                                                                 |                                           |                                                                                                                                                                                                                                                                                                                    |             |
|------------------|----|-------------------------------------------------------------------------------------------------------------------------------------------------------------------------------------------------------------------------------------------------------------------------------------------------------------------------------------------------|-------------------------------------------|--------------------------------------------------------------------------------------------------------------------------------------------------------------------------------------------------------------------------------------------------------------------------------------------------------------------|-------------|
|                  |    |                                                                                                                                                                                                                                                                                                                                                 |                                           | RECORD 12.2: Authors should provide information on the data cleaning methods used in the study.                                                                                                                                                                                                                    |             |
| Linkage          |    | ..                                                                                                                                                                                                                                                                                                                                              |                                           | RECORD 12.3: State whether the study included person-level, institutional-level, or other data linkage across two or more databases. The methods of linkage and methods of linkage quality evaluation should be provided.                                                                                          | Pages 8-11  |
| <b>Results</b>   |    |                                                                                                                                                                                                                                                                                                                                                 |                                           |                                                                                                                                                                                                                                                                                                                    |             |
| Participants     | 13 | (a) Report the numbers of individuals at each stage of the study ( <i>e.g.</i> , numbers potentially eligible, examined for eligibility, confirmed eligible, included in the study, completing follow-up, and analysed)<br>(b) Give reasons for non-participation at each stage.<br>(c) Consider use of a flow diagram                          | Page 12, 27                               | RECORD 13.1: Describe in detail the selection of the persons included in the study ( <i>i.e.</i> , study population selection) including filtering based on data quality, data availability and linkage. The selection of included persons can be described in the text and/or by means of the study flow diagram. | Pages 8-11. |
| Descriptive data | 14 | (a) Give characteristics of study participants ( <i>e.g.</i> , demographic, clinical, social) and information on exposures and potential confounders<br>(b) Indicate the number of participants with missing data for each variable of interest<br>(c) <i>Cohort study</i> - summarise follow-up time ( <i>e.g.</i> , average and total amount) | Pages 12-16<br><br>N/A<br><br>Pages 12-16 |                                                                                                                                                                                                                                                                                                                    |             |
| Outcome data     | 15 | <i>Cohort study</i> - Report numbers of outcome events or summary measures over time<br><i>Case-control study</i> - Report numbers in each exposure                                                                                                                                                                                             | Pages 12-16, 27-35                        |                                                                                                                                                                                                                                                                                                                    |             |



|                   |    |                                                                                                                                                                                                                                                                                                                                                                                                                 |                                          |                                                                                                                                                                                                                                                                                                          |     |
|-------------------|----|-----------------------------------------------------------------------------------------------------------------------------------------------------------------------------------------------------------------------------------------------------------------------------------------------------------------------------------------------------------------------------------------------------------------|------------------------------------------|----------------------------------------------------------------------------------------------------------------------------------------------------------------------------------------------------------------------------------------------------------------------------------------------------------|-----|
|                   |    | category, or summary measures of exposure<br><i>Cross-sectional study</i> - Report numbers of outcome events or summary measures                                                                                                                                                                                                                                                                                |                                          |                                                                                                                                                                                                                                                                                                          |     |
| Main results      | 16 | (a) Give unadjusted estimates and, if applicable, confounder-adjusted estimates and their precision (e.g., 95% confidence interval). Make clear which confounders were adjusted for and why they were included<br>(b) Report category boundaries when continuous variables were categorized<br>(c) If relevant, consider translating estimates of relative risk into absolute risk for a meaningful time period | Pages 12-16, 27-35<br><br>N/A<br><br>N/A |                                                                                                                                                                                                                                                                                                          |     |
| Other analyses    | 17 | Report other analyses done— e.g., analyses of subgroups and interactions, and sensitivity analyses                                                                                                                                                                                                                                                                                                              | Pages 12, 15, 16                         |                                                                                                                                                                                                                                                                                                          |     |
| <b>Discussion</b> |    |                                                                                                                                                                                                                                                                                                                                                                                                                 |                                          |                                                                                                                                                                                                                                                                                                          |     |
| Key results       | 18 | Summarise key results with reference to study objectives                                                                                                                                                                                                                                                                                                                                                        | Pages 17-22                              |                                                                                                                                                                                                                                                                                                          |     |
| Limitations       | 19 | Discuss limitations of the study, taking into account sources of potential bias or imprecision. Discuss both direction and magnitude of any potential bias                                                                                                                                                                                                                                                      | Pages 20-22                              | RECORD 19.1: Discuss the implications of using data that were not created or collected to answer the specific research question(s). Include discussion of misclassification bias, unmeasured confounding, missing data, and changing eligibility over time, as they pertain to the study being reported. | N/A |
| Interpretation    | 20 | Give a cautious overall interpretation of results considering objectives,                                                                                                                                                                                                                                                                                                                                       | Pages 17-22                              |                                                                                                                                                                                                                                                                                                          |     |

|                                                           |    |                                                                                                                                                               |             |                                                                                                                                                          |     |
|-----------------------------------------------------------|----|---------------------------------------------------------------------------------------------------------------------------------------------------------------|-------------|----------------------------------------------------------------------------------------------------------------------------------------------------------|-----|
|                                                           |    | limitations, multiplicity of analyses, results from similar studies, and other relevant evidence                                                              |             |                                                                                                                                                          |     |
| Generalisability                                          | 21 | Discuss the generalisability (external validity) of the study results                                                                                         | Pages 21-22 |                                                                                                                                                          |     |
| <b>Other Information</b>                                  |    |                                                                                                                                                               |             |                                                                                                                                                          |     |
| Funding                                                   | 22 | Give the source of funding and the role of the funders for the present study and, if applicable, for the original study on which the present article is based | Page 3      |                                                                                                                                                          |     |
| Accessibility of protocol, raw data, and programming code |    |                                                                                                                                                               |             | RECORD 22.1: Authors should provide information on how to access any supplemental information such as the study protocol, raw data, or programming code. | N/A |

\*Reference: Benchimol EI, Smeeth L, Guttman A, Harron K, Moher D, Petersen I, Sørensen HT, von Elm E, Langan SM, the RECORD Working Committee. The REporting of studies Conducted using Observational Routinely-collected health Data (RECORD) Statement. *PLoS Medicine* 2015; in press.

\*Checklist is protected under Creative Commons Attribution ([CC BY](https://creativecommons.org/licenses/by/4.0/)) license.

# BMJ Open

## COHORT STUDY EVALUATING THE BURDEN OF WOUNDS TO THE UK'S NATIONAL HEALTH SERVICE IN 2017/18: UPDATE FROM 2012/13

|                                 |                                                                                                                                                                                             |
|---------------------------------|---------------------------------------------------------------------------------------------------------------------------------------------------------------------------------------------|
| Journal:                        | <i>BMJ Open</i>                                                                                                                                                                             |
| Manuscript ID                   | bmjopen-2020-045253.R2                                                                                                                                                                      |
| Article Type:                   | Original research                                                                                                                                                                           |
| Date Submitted by the Author:   | 19-Nov-2020                                                                                                                                                                                 |
| Complete List of Authors:       | Guest, Julian F.; Catalyst Health Economics Consultants Ltd<br>Fuller, Graham; Catalyst Health Economics Consultants Ltd<br>Vowden, Peter; Bradford Teaching Hospitals NHS Foundation Trust |
| <b>Primary Subject Heading</b>: | Health economics                                                                                                                                                                            |
| Secondary Subject Heading:      | Evidence based practice, Health economics                                                                                                                                                   |
| Keywords:                       | HEALTH ECONOMICS, HEALTH SERVICES ADMINISTRATION & MANAGEMENT, WOUND MANAGEMENT                                                                                                             |
|                                 |                                                                                                                                                                                             |

SCHOLARONE™  
Manuscripts



I, the Submitting Author has the right to grant and does grant on behalf of all authors of the Work (as defined in the below author licence), an exclusive licence and/or a non-exclusive licence for contributions from authors who are: i) UK Crown employees; ii) where BMJ has agreed a CC-BY licence shall apply, and/or iii) in accordance with the terms applicable for US Federal Government officers or employees acting as part of their official duties; on a worldwide, perpetual, irrevocable, royalty-free basis to BMJ Publishing Group Ltd ("BMJ") its licensees and where the relevant Journal is co-owned by BMJ to the co-owners of the Journal, to publish the Work in this journal and any other BMJ products and to exploit all rights, as set out in our [licence](#).

The Submitting Author accepts and understands that any supply made under these terms is made by BMJ to the Submitting Author unless you are acting as an employee on behalf of your employer or a postgraduate student of an affiliated institution which is paying any applicable article publishing charge ("APC") for Open Access articles. Where the Submitting Author wishes to make the Work available on an Open Access basis (and intends to pay the relevant APC), the terms of reuse of such Open Access shall be governed by a Creative Commons licence – details of these licences and which [Creative Commons](#) licence will apply to this Work are set out in our licence referred to above.

Other than as permitted in any relevant BMJ Author's Self Archiving Policies, I confirm this Work has not been accepted for publication elsewhere, is not being considered for publication elsewhere and does not duplicate material already published. I confirm all authors consent to publication of this Work and authorise the granting of this licence.

**ORIGINAL ARTICLE****COHORT STUDY EVALUATING THE BURDEN OF WOUNDS TO THE UK'S  
NATIONAL HEALTH SERVICE IN 2017/18: UPDATE FROM 2012/13****Julian F Guest<sup>1</sup>, Graham W Fuller<sup>1</sup>, Peter Vowden<sup>2</sup>****<sup>1</sup>Catalyst Consultants, Poole, UK; <sup>2</sup>Bradford Teaching Hospitals NHS  
Foundation Trust, Bradford, UK.****Correspondence to:**

Professor Julian F Guest

Catalyst Consultants

PO Box 9429

Poole BH4 0HA

UK

Tel: +44 1923 450045

E-mail: [julian.guest@catalyst-health.com](mailto:julian.guest@catalyst-health.com)**Running title:** Health economic impact of wounds in the UK**Word count:** 6,179 excluding Abstract and References**Number of tables and figures:** 10 tables and 0 figures

## ABSTRACT

**Objective:** To evaluate the prevalence of wounds managed by the UK's National Health Service (NHS) in 2017/18 and associated health outcomes, resource use and costs.

**Design:** Retrospective cohort analysis of the electronic records of patients from The Health Improvement Network (THIN) database.

**Setting:** Primary and secondary care sectors in the UK.

**Participants:** Randomly selected cohort of 3,000 patients from the THIN database who had a wound in 2017/18.

**Primary and secondary outcome measures:** Patients' characteristics, wound-related health outcomes, healthcare resource use and total National Health Service (NHS) cost of patient management.

**Results:** There were an estimated 3.8 million patients with a wound managed by the NHS in 2017/18, of which 70% healed in the study year; 89% and 49% of acute and chronic wounds healed, respectively. An estimated 59% of chronic wounds healed if there was no evidence of infection compared to 45% if there was a definite or suspected infection. Healing rate of acute wounds was unaffected by the presence of infection. Smoking status appeared to only affect the healing rate of chronic wounds. Annual levels of resource use attributable to wound management included 54.4 million district/community nurse visits, 53.6 million healthcare assistant visits and 28.1 million practice nurse visits. The annual NHS cost of wound management was £8.3 billion, of which £2.7 billion and £5.6 billion was associated with managing healed and unhealed wounds, respectively. Eighty one per cent of the total annual NHS cost was incurred in the community.

**Conclusion:** The annual prevalence of wounds increased by 71% between 2012/13 and 2017/18. There was a substantial increase in resource use over this period and patient management cost increased by 48% in real terms. There needs to be a structural change within the NHS in order to manage the increasing demand for wound care and improve patient outcomes.

**Keywords:** Burden; cost; ulcers; wounds; UK.

## STRENGTHS AND LIMITATIONS OF THIS STUDY

- This is the first study to estimate how the health economic burden of wounds to the UK's NHS has changed over the last five years.
- This study was undertaken using real world evidence derived from the anonymised records of a randomised sample of 3,000 patients in The Health Improvement Network (THIN) database (a nationally representative database of clinical practice among >11 million patients registered with general practitioners in the UK).
- The estimates were derived following a systematic analysis of patients' characteristics, wound-related health outcomes and community-based and secondary care resource use pertaining to wound care contained in the patients' electronic records.
- The annual number of 3.8 million wounds in 2017/18 may be an underestimate since some of the patients in our data set may have had multiple wounds, but this is not transparent in the patients' records and it is very difficult to retrospectively extricate resource use for different wounds from the records of a patient with multiple wounds of the same aetiology.
- The analysis does not consider the potential impact of those wounds that remained unhealed beyond the study period, nor the potential impact of managing patients with wounds being cared for in nursing homes.



## ETHICS APPROVAL

Ethics approval to use anonymised patients' records from the THIN database for this study was obtained from the Research Ethics Committee that appraises studies using the THIN database (Reference number 18THIN093).

For peer review only

## INTRODUCTION

Our 2012/13 burden of wounds study estimated that the UK's National Health Service (NHS) managed 2.2 million patients with a wound at a cost of £5.3 billion [1-3]. An estimated 61% of all wounds in that burden of wounds study healed in the study year (79% of acute wounds and 43% of chronic wounds). Patients were predominantly managed in the community with 18.6 million practice nurse visits, 10.9 million community nurse visits, 7.7 million general practitioner (GP) visits, 3.4 million hospital outpatient visits. Five years ago, patients also received 97.1 million drug prescriptions and 262.2 million dressings. Additionally, only 16% of all cases with an ulcer of the lower limb had a Doppler ankle brachial pressure index recorded in their records [1].

This study led to such concern among politicians that the UK Parliament (House of Lords) debated developing a national strategy for improving the standards of wound care in the NHS [4]. As a consequence, NHS England and NHS Improvement established the National Wound Care Strategy Programme in the last quarter of 2018 [5]. The aim of the Programme is to scope the development of a national strategy for wound care in England that focuses on improving care relating to pressure ulcers, lower limb ulcers and surgical wounds [5].

Between 2012 and 2017 there was an estimated 4% decline in the number of practice nurses and a 30% decline in the number of district nurses employed in front-line patient care [6-9]. During this period we reported on unwarranted variation in wound care arising in part from inconsistencies in staff involvement and dressing choice and in many instances a lack of a coherent treatment plan [10-16]. Hence, it is reasonable to assume that not all patients with equal need have always had access to, or received, the same continuous levels of healthcare. However, patients should be afforded the best care available (within the context of limited resources) in order to obtain maximum health gains [17].

The aim of this new study was to assess the extent of change in the burden of wounds over five years (i.e. between 2012/13 and 2017/18) in terms of annual prevalence, health outcomes, healthcare resource use and NHS costs.

## METHODS

### Study Design

This was a retrospective cohort analysis of the anonymised case records of patients with a wound randomly extracted from The Health Improvement Network (THIN) database. The perspective of the analysis was the UK's NHS.

### The THIN Database

The THIN database contains electronic records on >11 million anonymised patients entered by GPs from >560 practices across the UK. The patient composition within the THIN database has been shown to be representative of the UK population in terms of demographics and disease distribution [18] and the database theoretically contains patients' entire medical history. In particular, the database collects data on the dates that patients registered or left their practice as well as demographic data, such as date of birth and gender. Patients who reside at the same address or are members of the same family can be linked using a household identifier, provided they are registered with the same general practice.

All medical conditions and symptoms recorded electronically during a patient's consultation in the general practice are recorded in the THIN database, thereby building up long computerised medical histories using Read Codes [19]. GP prescribing is computerised and entered directly into the database. Prescriptions not issued electronically (e.g. during home visits) are also entered, however there is a possibility of under-recording of such items. Information is also recorded on referrals to secondary care, including the specialty. Secondary care information and other medically related information received by the practice are entered into the database. This includes details on hospital admissions, discharge medication, diagnosis, outpatient consultations, investigations and treatment outcomes. Details from other healthcare interventions, such as information on lifestyle and preventative healthcare, as well as a range of variables such as height, weight, body mass index, blood pressure, smoking, alcohol status, immunisation and laboratory test results are also recorded. Hence, the information contained in the THIN database reflects actual clinical practice.

1  
2  
3 (THIN is a registered trademark of Cegedim SA in the United Kingdom and other countries.  
4 Reference made to the THIN database is intended to be descriptive of the data asset licensed  
5 by IQVIA, who interrogated the database and performed the randomisation independently of  
6 the Authors. The Authors had no direct access to the THIN database.)  
7  
8  
9

## 10 11 12 **Study Population** 13

14  
15 The study population comprised the anonymised case records of a randomly selected cohort of  
16 3,000 patients from the THIN database (provided to the Authors by IQVIA) who had a wound  
17 between 1 March 2017 and 28 February 2018.  
18  
19

20  
21 Patients were included in the data set if they:  
22

- 23 • Were 18 years of age or over.
- 24 • Had one of 2,095 wound-related Read codes (Supplementary table S1).
- 25 • Had continuous medical history in their case record from the first mention of a wound in  
26 the study year up to the time the data were extracted from the database, unless they died,  
27 in order to exclude patients who had moved or changed their general practice.  
28  
29  
30  
31  
32  
33

34 Patients were excluded from the data set if they had a surgical wound that healed within four  
35 weeks of the surgical procedure (since any resource use incurred would be due to the surgical  
36 procedure and not the wound) or if they had a dermatological tumour. These  
37 inclusion/exclusion criteria are identical to those used in our earlier 2012/13 study [1].  
38  
39  
40  
41  
42

43 Every patient in the THIN database who fulfilled the study's inclusion and exclusion criteria  
44 was assigned a random number by IQVIA. A representative sample was then generated by  
45 random selection of the random numbers of the whole cohort using a uniform distribution. As  
46 such, IQVIA advised that the random sample was representative of the whole population from  
47 which it was derived. The complete electronic records of the 3,000 patients in the sample were  
48 then supplied to the Authors, which enabled analysis of data both within and outside of the  
49 study period.  
50  
51  
52  
53  
54  
55  
56  
57  
58  
59  
60

## Patient and Public Involvement

Patients and members of the public were not directly involved in this study. The study population was limited to the anonymised records of patients in the THIN database.

## Study Variables and Statistical Analyses

Wound type was documented in the patients' records and the authors categorised them as being either acute (i.e. abscess, burn, open wound, unhealed surgical wound, trauma) or chronic (i.e. diabetic foot ulcer, arterial leg ulcer, mixed leg ulcer, venous leg ulcer, pressure ulcer). The following information was systematically extracted from the patients' electronic records over the 12 months from 1 March 2017 to 28 February 2018 according to the protocol approved by the ethics committee.

- Patients' characteristics.
- Patients' comorbidities (defined as a non-acute condition that patients were suffering from in the year before the start of their wound and not necessarily the year before the start of the study period).
- Wound-related healthcare resource use (i.e. dressings, bandages, topical treatments, negative pressure wound therapy, district nurse and healthcare assistants visits (both of whom provide care within a patient's home), practice nurse visits (who provide care within the general practice), GP visits, hospital outpatient visits, laboratory tests), prescribed medication (i.e. analgesics, non-steroidal anti-inflammatory drugs (NSAIDs) and systemic anti-infectives (principally antibiotics)).
- Clinical outcomes (i.e. healing and putative infection).

If a patient received a bandage or dressing on a specific date, but a clinician visit was not documented in their record, it was assumed the patient had been seen outside of the general practice by a district nurse or healthcare assistant. No other assumptions were made regarding missing data and there were no other interpolations.

The use of individual healthcare resources was quantified for all the patients, individually. These quantities were then used to estimate the total utilisation of each healthcare resource attributable to wound management during the study period, stratified by wound type.

1  
2  
3 Clinical outcomes and wound-related healthcare resource use associated with the sample of  
4 3,000 patients were used to model the healing rates and the total annual amounts of healthcare  
5 resource use associated with wound care provided to adult patients who were  $\geq 18$  years of age  
6 by the NHS in 2017/18.  
7  
8  
9

10  
11 Differences between subgroups were tested for statistical significance using a  $\chi^2$  test. Logistic  
12 regression was used to investigate relationships between baseline variables and clinical  
13 outcomes. The p values  $< 0.05$  were considered statistically significant and have been reported.  
14 All p values  $\geq 0.05$  were not considered to be statistically significant and these numerical values  
15 have not been reported. All statistical analyses were performed using IBM SPSS Statistics  
16 (IBM UK, Portsmouth, Hampshire, UK).  
17  
18  
19  
20  
21  
22

### 23 24 **Cost of Patient Management**

25  
26  
27 The NHS cost of wound care for each patient was estimated by assigning unit costs at 2017/18  
28 prices [20-22] to the quantity of healthcare resources used by individual patients from the time  
29 a patient entered the data set (i.e. from 1 March 2017 or the start time of their wound if it  
30 occurred later) up to the time their wound healed or the end of the study period, whichever  
31 came first. The total cost of utilisation of each healthcare resource for the sample of 3,000  
32 patients was then combined in order to estimate their total NHS cost of wound management  
33 over the study period. The NHS cost of wound management for this cohort was then used to  
34 model the total cost of wound care provided to adult patients who were  $\geq 18$  years of age by the  
35 NHS in 2017/18. The cost of wound care was also estimated by stratifying patients according  
36 to their category of wound. Accordingly, the study only considers the cost of patient  
37 management attributable to wounds in primary and secondary care settings, and does not  
38 estimate patients' overall healthcare costs.  
39  
40  
41  
42  
43  
44  
45  
46  
47  
48

### 49 50 **Sensitivity Analyses**

51  
52  
53 Bootstrapping was undertaken to estimate the margin of error surrounding the annual  
54 prevalence of wounds and costs. This involved generating subsets of the data of each wound  
55 type on the basis of random sampling and replacing the data once sampled. These subsets  
56 enabled an estimation of the 95% confidence intervals (CI) of (1) the annual number of wounds  
57 managed by the NHS in 2017/18 and (2) the NHS costs of wound management.  
58  
59  
60

1  
2  
3 Deterministic sensitivity analyses were performed on all of the model’s inputs to identify how  
4 the NHS cost of wound management would change by varying the different parameters in the  
5 model.  
6  
7  
8  
9  
10  
11  
12  
13  
14  
15  
16  
17  
18  
19  
20  
21  
22  
23  
24  
25  
26  
27  
28  
29  
30  
31  
32  
33  
34  
35  
36  
37  
38  
39  
40  
41  
42  
43  
44  
45  
46  
47  
48  
49  
50  
51  
52  
53  
54  
55  
56  
57  
58  
59  
60

For peer review only



## RESULTS

### Prevalence of Wounds in the UK

The base population of the THIN database in 2017/18 was 2.4 million active adult patients who were  $\geq 18$  years of age. The database was interrogated, independently of the Authors, to identify patients with at least one of the 2,095 wound-related Read codes. The search identified 174,569 adult patients with a wound in 2017/18 who matched the study protocol's inclusion and exclusion criteria. The UK's population comprised 52.1 million adults who were  $\geq 18$  years of age in mid-2017 [23]. Using these variables, the outputs of the modelling were extrapolated to the whole adult population in the UK. Accordingly, the model estimated that there were 3.8 million adult patients with a wound in the UK in 2017/18 who matched the study protocol's inclusion and exclusion criteria, equivalent to 7% of the adult population (Table 1). Bootstrapping was undertaken using 100 subsets of the counts of each wound type. This indicated the lower and upper 95% confidence intervals of the annual number of wounds managed by the NHS in 2017/18 to be 3.67 million and 3.96 million. Hence, the margin of error surrounding the estimated annual prevalence of wounds is around 3%.

Sixteen per cent of all wounds had no diagnosis and it was not possible to infer a wound type from the patients' records. Additionally, 9% of all wounds were a leg ulcer without any further characterisation (i.e. venous, arterial or mixed). Hence, the records of 25% of all wounds lacked a recorded differential diagnoses. In total, there were 1 million ulcers of the lower limb, which equates to 2.0% of the adult population having a lower limb ulcer in the study year. Of these, the number of diagnosed venous leg ulcers (560,000) indicates that 1.1% of all adults  $\geq 18$  years of age had such an ulcer in the study year. In addition, there were an estimated 326,000 diabetic foot ulcers, which equates to 9% of all adult diabetic patients (i.e. 3.46 million individuals [24]) having a foot ulcer in the study year. There were an estimated 202,000 recorded pressure ulcers in the study year, equivalent to 0.4% of the total adult population (Table 1).

### Patients' Characteristics

A representative sample of 3,000 patients was randomly selected from the cohort of 174,569 patients with a wound-related Read code by IQVIA. Patients' age in the randomly selected study population was a mean of 57.9 years and 67% were  $< 65$  years of age. A total of 56% of

1  
2  
3 patients were female. Mean blood pressure was 130/77 and patients' body mass index was a  
4 mean 29.1 kg/m<sup>2</sup>. An estimated 17% of patients were smokers, 30% were ex-smokers and 52%  
5 were non-smokers. A total of 73% of patients presented with a new wound in the study year  
6 (patients' records predated the onset of the study period, enabling both pre-existing and new  
7 wounds to be identified). Table 2 (and supplementary Table S2) summarise patients'  
8 characteristics according to wound type.  
9  
10  
11  
12  
13  
14

15 The percentage of patients with different comorbidities in the year before the start of their  
16 wound (and not necessarily the year before the start of the study) stratified by wound type is  
17 summarised in Table 3 (and supplementary Table S3). A total of 95% of patients had at least  
18 one comorbidity in the year before the start of their wound. Moreover, patients had a mean of  
19 4.1 comorbid conditions and 57% of all patients had diabetes. It is also noteworthy that 13%  
20 of patients with a pressure ulcer were recorded as suffering from malnutrition, whereas it was  
21 ≤5% of patients with other wound types.  
22  
23  
24  
25  
26  
27  
28

### 29 **Clinical Outcomes**

30  
31  
32 The THIN database does not define wound healing. Wound healing was a clinical observation  
33 documented in the patient's record by their managing clinician, but not necessarily confirmed  
34 by a specialist, and it is unknown if the clinicians who managed these patients used any  
35 consistent definition. Additionally, there is no Read for wound healing. Nevertheless, an  
36 episode of care was not a proxy for time to healing. Furthermore, if a wound was not recorded  
37 as being healed it was considered to be unhealed. This assumption was supported by continued  
38 clinician visits for wound care and the continued prescribing of wound care products. On this  
39 basis, Table 4 (and supplementary Table S4) summarise the recorded healing rates stratified by  
40 wound type and various sub-groups between 1 March 2017 and 28 February 2018. A total of  
41 70% of all wounds (n = 2.7 million) healed in the study year; 89% of acute wounds healed and  
42 49% of chronic wounds. An estimated 30% of all wounds (n = 1.1 million) remained unhealed.  
43 Patients' age did not appear to affect the overall healing rate. However, 59% of chronic wounds  
44 healed if there was no evidence of infection compared to 45% if there was a definite or  
45 suspected infection. The healing rate among acute wounds was unaffected by the presence of  
46 infection (86% versus 91% among acute wounds with no evidence of infection). An estimated  
47 38% of chronic wounds healed if patients were smokers compared to 55% and 58% if patients  
48  
49  
50  
51  
52  
53  
54  
55  
56  
57  
58  
59  
60

1  
2  
3 were non-smokers or ex-smokers, respectively. Smoking status did not appear to affect the  
4 healing rate of acute wounds (Table 4 and supplementary Table S4).  
5  
6

7 For the whole cohort of patients with a wound, binary logistic regression suggested that  
8 cardiovascular disease (Odds ratio (OR) 0.57 (95% CI 0.46 to 0.71);  $p < 0.001$ ), immunological  
9 disorders (OR 0.62 (95% CI 0.45 to 0.86);  $p = 0.003$ ) and renal disorders (OR 0.56 (95% CI  
10 0.43 to 0.73);  $p < 0.001$ ) were independent risk factors for non-healing during the study period.  
11 Additionally, the presence of renal disease was an independent risk factor for non-healing of  
12 diabetic foot ulcers (OR 0.28 (95% CI: 0.13 to 0.62);  $p = 0.002$ ), and diabetes was an  
13 independent risk factor for non-healing of venous leg ulcers (OR 0.10 (95% CI: 0.01 to 0.96);  
14  $p < 0.02$ ).  
15  
16  
17  
18  
19  
20  
21  
22

### 23 **Healthcare Resource Use Associated with Patient Management**

24

25  
26 Patients were predominantly managed in the community by GPs, practice nurses,  
27 district/community nurses and healthcare assistants. Table 5 (and supplementary Table S5)  
28 summarise the percentage of patients who utilised different resources during the study year and  
29 Table 6 shows the annualised resources associated with each wound type. All the hospital  
30 admissions attributable to venous and mixed leg ulcers appeared to be linked to a suspected  
31 infection. So too were 80% of admissions attributable to diabetic foot ulcers and 95% of  
32 admissions attributable to open wounds. All these hospitalised patients with a suspected  
33 infection were prescribed antibiotics. All the open wounds and 50% of the diabetic foot ulcers  
34 healed in the study period, but none of the venous and mixed leg ulcers healed. Less than 50%  
35 of admissions attributable to the other wound types appeared to be linked to a suspected  
36 infection and 90% of them healed during the study period. Only one-third of admissions  
37 attributable to surgical wounds and trauma appeared to be linked to a suspected infection.  
38  
39  
40  
41  
42  
43  
44  
45  
46  
47  
48

49 Patients' treatment varied according to wound type and wound duration. Patients were  
50 prescribed a mix of dressings up to the time their wound healed or the end of the study period,  
51 whichever came first. Overall, patients' dressings were changed every 3-4 days at a nursing  
52 visit. However, this varied according to wound type. On average:  
53  
54

- 55 • Those patients with a burn or a venous leg ulcer had one nursing visit/dressing change  
56 every 2-3 days.  
57  
58  
59  
60

- Those patients with a diabetic foot ulcer, arterial leg ulcer, mixed leg ulcer, pressure ulcer or surgical wound had one nursing visit/dressing change every 3-4 days.
- Those patients with an unspecified leg ulcer, open wound, trauma or unspecified wound had one nursing visit/dressing change every 4-5 days.
- Those patients with an abscess had one nursing visit/dressing change every 5-6 days

Less than 1% of patients were prescribed the same dressing for the duration of their wound or study period. On average, patients were prescribed a mean of 8 different dressing types over the study period, ranging from a mean of 4 different dressing types for patients with a burn to a mean of 9 different dressing types for patients with an unclassified wound. In addition to dressings and bandages, varying percentages of patients were prescribed analgesics, NSAIDs and antibiotics as shown in Table 5 (and supplementary Table S5).

Assessment of peripheral perfusion is a recognised requirement for leg ulcer and diabetic foot management. However, only 15% of all those with a leg or foot ulcer had a Doppler ankle brachial pressure index (ABPI) recorded in their records, of which 75% were prescribed some form of compression. Of the 85% who did not have their ABPI recorded, 29% were prescribed compression bandages/hosiery (Table 7). Over 90% of the patients with a recorded venous leg ulcer were prescribed compression bandages/hosiery, irrespective of whether they had their ABPI recorded; so too did >50% of patients with a recorded diabetic foot ulcer (Table 7).

### **NHS Cost of Patient Management**

The total annual NHS cost of managing 3.8 million patients with a wound was estimated to be £8.3 billion (95% CI: £7.9; £8.5) billion (Table 8). The use of 100 bootstrapped samples indicated a 5% margin of error around the costs (Table 8). When the bootstrapping was repeated using 1,000 subsets of cost data, the margin of error decreased to 1% (i.e. 95% CI: £8.2; £8.4 billion). District/community nurse visits were the primary cost driver accounting for 29% of all costs and GP office visits were the secondary cost driver accounting for a further 18% of the total cost. Healthcare assistant visits accounted for 17% of the total cost, practice nurse visits for 7% and wound care products for a further 6% (Table 8).

1  
2  
3 Resource use associated with managing the unhealed wounds was substantially greater than  
4 that of managing the healed wounds (Table 9). Consequently, the annual cost of managing the  
5 70% of wounds that healed was estimated to be £2.7 billion compared with £5.6 billion for the  
6 30% of wounds that did not heal within the study year. In addition, within the study period, the  
7 cost per healed wound ranged from £358 to £4,684 per patient and that of an unhealed wound  
8 ranged from £831 to £7,886 per patient (Table 10).  
9  
10  
11  
12  
13  
14

15 Eighty-one per cent of the total annual NHS cost was incurred in the community and the  
16 remainder in secondary care. However, the distribution of costs varied according to wound  
17 type, with 68% and 85% of the total annual NHS cost of managing acute and chronic wounds,  
18 respectively, being incurred in the community and the remainder in secondary care.  
19  
20  
21  
22  
23

### 24 **Sensitivity Analyses**

25  
26  
27 When the healing rate of each wound type was simultaneously varied by  $\pm 25\%$ , the total annual  
28 NHS cost of wound management changed by  $\pm 16\%$ . When the estimated annual number of  
29 each wound type was individually changed by  $\pm 25\%$ , the total annual NHS cost of wound  
30 management changed by 10% or less. When the estimated amounts of resource use were  
31 individually varied by  $\pm 25\%$ , the total annual NHS cost of managing 3.8 million wounds  
32 changed by 7% or less. When the unit costs of wound care products were simultaneously varied  
33 by  $\pm 25\%$ , the total annual NHS cost of managing 3.8 million patients with a wound changed  
34 by  $<3\%$ .  
35  
36  
37  
38  
39  
40  
41  
42  
43  
44  
45  
46  
47  
48  
49  
50  
51  
52  
53  
54  
55  
56  
57  
58  
59  
60

## DISCUSSION

The 2012/13 burden of wounds study [1, 2] incorporated a predictive model [3] which forecast that the prevalence of wounds would increase by 11% per annum. Thus, the model predicted there would be 3.8 million patients with a wound in 2017/18. The findings from the current analysis are consistent with the estimates from this predictive model, with the overall annual number of patients with a wound having increased by 71% over the five years to 3.8 million. However, the rate of increase varied according to wound type. The annual number of patients with a wound increased by  $\geq 100\%$  for many wound types, but some acute wounds increased by 60% and pressure ulcers by only 32%, perhaps due in part to the ongoing pressure ulcer prevention campaign [25]. The model also predicted that costs would increase in parallel with prevalence. However, when the £5.3 billion [1] is updated to 2017/18 prices (i.e. £5.6 billion), it would appear that the annual cost of wound care has increased at an approximate rate of 8-9% per annum. Hence, the overall annual NHS cost of wound care has increased by 48% in real terms over the five years.

The aim of this study was to assess the annual health economic burden of wounds by quantifying the amount of resource use and corresponding costs associated with wound management in 2017/18. From the NHS' perspective, resource use and corresponding cost of managing a patient with multiple wounds does not end until all the wounds heal. Some of the patients in our data set may have had multiple wounds, but this was not specifically listed within the database and was not transparent in the patients' records. Furthermore, it would be very difficult to retrospectively extricate resource use for different wounds from the records of a patient with multiple wounds of the same aetiology. Notwithstanding this, it would be unusual for an individual to have two wounds of different aetiologies at the same time. However, it may be that in 2017/18 some of the patients with an ulcer of the lower limb had a second ulcer, although it would be unlikely that patients with other wounds would have multiple wounds. If 10% of patients with an ulcer of the lower limb had a second ulcer, the total number of wounds would increase by 5% from 3.8 million to 4.0 million. The implication of this is that the NHS may have managed more than 3.8 million wounds in 2017/18. Nevertheless, the estimated amount of resource use and corresponding costs as presented would remain unchanged since all the resources and wound care products utilised in managing each patient were documented in their record (despite the lack of granularity surrounding the number of wounds they may have had).



1  
2  
3 In the 2012/13 data set, 65% of all the patients with a wound were 65 years of age or older [1,  
4 2]. However, in the 2017/18 data set, only 33% of patients were 65 years of age or older. This  
5 was a significant difference ( $p < 0.001$ ), suggesting that wounds are no longer predominantly  
6 the preserve of the elderly. In 2012/13, 39% of all patients were non-smokers. However, by  
7 2017/18 this percentage had increased significantly to 52% ( $p < 0.001$ ). In parallel with these  
8 changes in the patient demographics there was a change in the distribution of comorbidities. In  
9 particular, in 2012/13, 73% and 37% of patients had cardiovascular and musculoskeletal  
10 disorders, but in 2017/18 an estimated 53% ( $p < 0.001$ ) and 56% ( $p < 0.02$ ) had cardiovascular  
11 and musculoskeletal disorders, respectively. Most striking, however, was that 29% of the  
12 2012/13 cohort had diabetes compared with 57% in 2017/18 ( $p < 0.05$ ). Additionally, the  
13 variation in the mean number of comorbidities associated with different wound types in this  
14 study parallels the variation in Charlson Comorbidity Index associated with different wound  
15 types observed in a patient population in Asia [26].  
16  
17  
18  
19  
20  
21  
22  
23  
24  
25  
26

27 Over the five year period, the healing rate of acute wounds increased by a mean of 13% and  
28 that of chronic wounds by a mean of 15%. However, within this estimate, the healing rate of  
29 diabetic foot ulcers and pressure ulcers increased by 27% and 43%, respectively, but the  
30 healing rate of venous and mixed leg ulcers decreased by 21% and 28%, respectively. The  
31 percentage of patients accessing different resources increased over the five years and so too  
32 did the absolute amount of resource use. For example, between 2012/13 and 2017/18 there was  
33 >11,000% increase in the number of healthcare assistant visits (from 0.5 million to 53.6  
34 million), a 401% increase in the number of district nurse visits (from 10.9 million to 54.4  
35 million), 164% increase in the number of GP visits (from 7.7 million to 20.3 million), 96%  
36 increase in the number of hospital outpatient visits (from 3.4 million to 6.8 million) and 51%  
37 increase in the number of practice nurse visits (from 18.6 million to 28.1 million). In addition,  
38 there was a 2% decrease in the number of specialist nurse visits and a 104% increase in the  
39 amount of wound care products used. The changes in the annual cost of these resources mirror  
40 the changes in utilisation of these resources. Accordingly, the NHS cost of wound care in  
41 2017/18 was an estimated £8.3 billion, which is approaching the combined annual NHS cost  
42 of managing osteo and rheumatoid arthritis, which was reported to be £10.2 billion in 2017  
43 [27].  
44  
45  
46  
47  
48  
49  
50  
51  
52  
53  
54  
55  
56

57  
58 The shift towards greater utilisation of community-based resources is reflected in the  
59 distribution of care between secondary care and the community. In 2012/13, 48% of the costs  
60



1  
2  
3 of managing acute wounds and 78% of the costs of managing chronic wounds were incurred  
4 in the community and the remainder in secondary care [1, 2]. In 2017/18, 68% and 85% of the  
5 costs of managing acute and chronic wounds, respectively, were incurred in the community  
6 and the remainder in secondary care.  
7  
8  
9

10  
11 This present study has also highlighted that resource use associated with managing the 30% of  
12 wounds that did not heal in the study year was substantially greater than that of managing the  
13 70% of wounds that did heal within the study year (e.g. 325% more hospital outpatient visits,  
14 178% more practice nurse visits, 171% more GP visits, 118% more accident & emergency  
15 attendances, 97% more district/community nurse visits and 85% more healthcare assistant  
16 visits). Consequently, the annual cost of managing wounds that healed within the study year  
17 was estimated to be £2.7 billion compared with £5.6 billion for the 30% of wounds that did not  
18 heal within the study year. In addition, the mean cost of an unhealed wound (£3,700) was  
19 approximately 2.5 times more than that of a wound that healed during the study period  
20 (£1,500). Sensitivity analysis showed the healing rate to have a large effect on the cost of  
21 wound care and regression analysis indicated that the presence of cardiovascular disease or  
22 immunological disorders or renal disorders were all independent risk factors for non-healing  
23 during the study period. In the 2012/13 study both nutritional deficiency and diabetes were  
24 independent risk factors for non-healing during the study period [1]. In this study, only a mean  
25 of 3% of patients had malnutrition, possibly reflecting the significantly lower age of the study  
26 population. However, 13% of patients with a pressure ulcer had malnutrition and their BMI  
27 was a mean of 24.5 kg/m<sup>2</sup> which was lower than that of patients with other wound types.  
28 Diabetes did not exert an independent effect on healing possibly because 59% of the patients  
29 with diabetes also had cardiovascular disease, 19% had renal disease, and 11% had  
30 immunological disorders. In addition, 61% of the patients with diabetes had musculoskeletal  
31 disorders and 38% had a mental health condition (principally depression and anxiety). The age  
32 of the patients with diabetes was a mean of 59.2 years per patient and 44% were male.  
33  
34  
35  
36  
37  
38  
39  
40  
41  
42  
43  
44  
45  
46  
47  
48  
49  
50

51 This and many other studies [10-12, 28, 29] have shown that wound management is  
52 predominantly a nurse-led discipline. Nevertheless, there still seems to be minimal clinical  
53 involvement of tissue viability nurses and other specialist nurses in direct patient management.  
54 In addition, dressing and bandage types were continually switched at successive wound  
55 dressing changes for the majority of patients, suggesting confusion and conflict within the  
56 treatment plan. It was not possible to determine which professional groups were the decision  
57  
58  
59  
60

1  
2  
3 makers in relation to changes in dressing type and what the goal of treatment changes were as  
4 this information was not specifically recorded in the patients' records. Moreover, an estimated  
5 25% of all wounds being managed within the NHS in 2017/18 lacked a recorded differential  
6 diagnosis in the patient's record. Furthermore, only 15% of patients with an ulcer on the lower  
7 limb had a vascular assessment with Doppler ABPI recorded in their records, contrary to  
8 national guidance [30, 31]. Nevertheless, we observed a 14% decrease in the proportion of  
9 patients with unspecified leg ulcers since 2015 which may be due to an increase in measuring  
10 ABPI even if it was not documented in the patients' records. It remains unclear and  
11 disappointing to find that records still lacked documentation of this essential investigation.  
12 Moreover, five years later, patients' records still appear to lack any evidence of consistent  
13 reporting of wound management processes. This may be indicative of the difficulties  
14 experienced by non-specialist health care professionals in the community with establishing a  
15 working diagnosis.

16  
17  
18  
19  
20  
21  
22  
23  
24  
25  
26  
27 It seems unclear how the NHS can best respond to the ever-increasing demand for wound care.  
28 The NHS Long Term Plan [32] has described how the NHS will move to a new service model  
29 in which patients will have properly joined-up care at the right time in the optimal care setting.  
30 This will involve having online 'digital' GP consultations, and redesigned hospital support in  
31 order to free-up about one-third of outpatient appointments [32]. Additionally, GP practices  
32 will be funded to create integrated teams of GPs, community health and social care staff [32].  
33 These expanded community health teams will provide fast support to people in their own  
34 homes [32]. Ultimately, the NHS will aim to create Integrated Care Systems everywhere by  
35 April 2021, which bring together local organisations to deliver a 'triple integration' of primary  
36 and specialist care, physical and mental health services and health with social care [32].  
37 Additionally, commissioners will be tasked to share decisions with providers on population  
38 health, service redesign and Long Term Plan implementation [32]. Such a change in the system  
39 may facilitate getting the optimum care to patients at the right time in the right setting in order  
40 to improve the patient experience and health outcomes, thereby freeing-up healthcare resources  
41 and reducing costs. However, will this method of care delivery improve wound care and  
42 associated patient outcomes? The introduction of truly seamless care with integrated electronic  
43 patient records would improve overall patient management, However, patients with wounds  
44 need face-to-face interaction with clinicians on a regular basis to monitor progress and have  
45 their dressings changed. The Authors are therefore of the opinion that this model would require  
46 the NHS to establish dedicated wound care clinics in the community at which patients receive  
47  
48  
49  
50  
51  
52  
53  
54  
55  
56  
57  
58  
59  
60

1  
2  
3 consistent and integrated care from clinicians with qualified experience in wound care, with  
4 the clinics linking directly to electronic patient records which are integrated across all  
5 healthcare sectors. These clinics could provide both direct care and holistic assessments of  
6 patients allowing co-ordinated management of any comorbidities which may impact on wound  
7 healing  
8  
9  
10  
11  
12

13 The advantages and disadvantages of using the THIN database for this study have been  
14 previously discussed [1]. In summary, the advantage of using the THIN database is that the  
15 patient pathways and associated resource use are based on real-world evidence derived from  
16 clinical practice. However, the possibility of resource use associated with managing a  
17 comorbidity being conflated with that of wound management cannot be excluded. While the  
18 study results are compelling, the analyses were based on clinicians' entries into their patients'  
19 records and inevitably subject to a certain amount of imprecision and lack of detail. Moreover,  
20 the computerised information in the THIN database is collected by GPs for clinical care  
21 purposes and not for research. Prescriptions issued by GPs and practice nurses are recorded in  
22 the database, but it does not specify whether the prescriptions were dispensed or detail patient  
23 compliance with the product. Despite these limitations, it is the authors' opinion that the THIN  
24 database affords one of the best sources of real-world evidence for clinical practice in the UK,  
25 since it is representative of the whole UK population [18, 33] and there are only minor  
26 differences between this and other real-world evidence databases in the UK [33]. Moreover,  
27 the changes between 2012/13 and 2017/18 are clinically relevant, since the sample size in this  
28 study is 3,000 patients versus 1,000 patients in the earlier study. Furthermore a review of  
29 Medline in August 2020 identified 283 articles in peer-reviewed journals in which the THIN  
30 database had been used to characterise clinical practice in a wide range of therapeutic areas in  
31 the UK, of which 28 had been published in BMJ Open since 2014. Notwithstanding this, it is  
32 not possible to ascertain from the data set whether some of the changes between 2012/13 and  
33 2017/18 are due to increased complexity of wound aetiology and a decrease in competency of  
34 the clinical staff caring for these patients. There is no recognised complexity index/score for  
35 wounds so any measure of this would be subjective. Additionally, the low involvement of  
36 senior staff in patient management may indicate competency as a possible issue, but this cannot  
37 be quantified.  
38  
39  
40  
41  
42  
43  
44  
45  
46  
47  
48  
49  
50  
51  
52  
53  
54  
55  
56  
57

58 The analysis does not consider the potential impact of those wounds that remained unhealed  
59 beyond the study period. The THIN database may have under-recorded use of some health care  
60

1  
2  
3 resources outside the GP's surgery if not documented in the GP records, and the impact of this  
4 was addressed in sensitivity analyses. In particular, not all community records may have been  
5 linked to the GP records. The analysis excludes hospital-based prescribing, but this should have  
6 minimal impact on the results as most prescribing is undertaken by GPs and nurses in the  
7 community. Also excluded is the potential impact of managing patients with wounds being  
8 cared for in nursing/residential homes.  
9

10  
11  
12  
13  
14  
15 The analysis only considered the annual cost of NHS resource use for the 'average adult  
16 patient', and no attempt was made to stratify resource use and costs according to gender,  
17 comorbidities, wound size, wound severity and other disease-related factors. Also excluded  
18 were the costs incurred by patients and indirect societal costs as a result of patients taking time  
19 off work. In 2012/13, only 35% of patients with a wound were of working age. However, in  
20 2017/18 nearly 70% of the cohort was less than 65 years of age and 6% of patients in this age  
21 group were admitted into hospital. In April 2018 the gross median salary for full-time  
22 employees was £569 per week [34]. Hence, the indirect societal cost in lost GDP arising from  
23 hospitalisation (assuming 96% of these patients were in full-time employment [35]) amounted  
24 to £87 million. This is likely to be an underestimate, since a proportion of patients are likely to  
25 be absent from work due to their wound, but residing in their home. Nevertheless, this is a  
26 relatively negligible indirect cost considering that nocturia (which predominantly affects the  
27 elderly population) accounts for over £4 billion in lost GDP [36].  
28  
29  
30  
31  
32  
33  
34  
35  
36  
37  
38

39 Notwithstanding the study's limitations, real-world evidence highlights the substantial burden  
40 that wounds continue to impose on the NHS in an average year. Clinical and economic benefits  
41 to both patients and the NHS could accrue from strategies that focus on (a) accurate diagnosis,  
42 (b) preventing infection and (c) improving wound-healing rates. However, these benefits are  
43 unlikely to be realised unless there is a structural change within the NHS in order to manage  
44 the increasing demand for wound care.  
45  
46  
47  
48  
49  
50  
51  
52  
53  
54  
55  
56  
57  
58  
59  
60

## ACKNOWLEDGEMENTS

The authors thank Kathryn Vowden, University of Bradford, Bradford, UK, for her appraisal and input into this manuscript.

## CONTRIBUTORSHIP STATEMENT

J.F.G. designed the study, obtained the THIN data set, managed the analyses, performed some analyses, checked all the other analyses, and wrote the manuscript.

G.W.F. conducted much of the analyses.

P.V. scrutinised the analyses, suggested further analyses and helped interpret some of the findings.

All the authors were involved in revising the manuscript and gave final approval. J.F.G. is the guarantor of this work and, as such, had full access to all the data in the study and takes responsibility for the integrity of the data and the accuracy of the data analysis.

## COMPETING INTERESTS

None declared.

## FUNDING

This study was funded by J.F.G., the lead author and by a donation from Essity, Hull, UK.

## DATA SHARING STATEMENT

The THIN data set cannot be shared as this restriction was a condition of the ethics approval obtained from the Research Ethics Committee (Reference number 18THIN093). Questions concerning the data underlying the results can be sent to the Corresponding Author.

For peer review only

**REFERENCES**

1. Guest JF, Ayoub N, McIlwraith T, Uchegbu I, Gerrish A, Weidlich D et al. Health economic burden that wounds impose on the National Health Service in the UK. *BMJ Open*. 2015;5(12):e009283. doi:10.1136/bmjopen-2015-009283.
2. Guest JF, Ayoub N, McIlwraith T, Uchegbu I, Gerrish A, Weidlich D et al. Health economic burden that different wound types impose on the UK's National Health Service. *Int Wound J*. 2016. doi:10.1111/iwj.12603.
3. Guest JF, Vowden K, Vowden P. The health economic burden that acute and chronic wounds impose on an average clinical commissioning group/health board in the UK. *J Wound Care*. 2017;26(6):292-303. doi:10.12968/jowc.2017.26.6.292.
4. House of Lords Hansard. House of Lords debate on developing a strategy for improving the standards of wound care in the NHS. 2017. <https://hansard.parliament.uk/lords/2017-11-22/debates/6C57E65A-A04D-449B-82E9-C836F088A696/NHSWoundCare>.
5. NHS England. National Wound Care Strategy Programme. <https://www.ahsnnetwork.com/about-academic-health-science-networks/national-programmes-priorities/national-wound-care-strategy-programme>.
6. NHS Digital. general\_practice\_provisional\_tables\_december\_2017\_-\_nurse. 2018. <https://digital.nhs.uk/data-and-information/publications/statistical/general-and-personal-medical-services/as-at-31-december-2017-provisional-experimental-statistics>.
7. NHS Digital. nhs-staf-sept-2016-summ. 2017. <https://digital.nhs.uk/data-and-information/publications/statistical/nhs-workforce-statistics/nhs-workforce-statistics-november-2016-provisional-statistics>.
8. House of Commons Health Committee. The nursing workforce - Second Report of Session 2017–19: HC353,. 2018. <https://publications.parliament.uk/pa/cm201719/cmselect/cmhealth/353/353.pdf>.
9. Royal College of Nursing. The UK nursing labour market review 2018. 2018. <https://www.rcn.org.uk>
10. Guest JF, Fuller GW, Vowden P. Clinical outcomes and cost-effectiveness of three different compression systems in newly-diagnosed venous leg ulcers in the UK. *J Wound Care*. 2017;26(5):244-54. doi:10.12968/jowc.2017.26.5.244.
11. Guest JF, Singh H, Rana K, Vowden P. Cost-effectiveness of an electroceutical device in treating non-healing venous leg ulcers: results of an RCT. *J Wound Care*. 2018;27(4):230-43. doi:10.12968/jowc.2018.27.4.230.



12. Panca M, Cutting K, Guest JF. Clinical and cost-effectiveness of absorbent dressings in the treatment of highly exuding VLU. *J Wound Care*. 2013;22(3):109-18. doi:10.12968/jowc.2013.22.3.109.
13. Guest JF, Fuller GW, Vowden P. Diabetic foot ulcer management in clinical practice in the UK: costs and outcomes. *Int Wound J*. 2018;15(1):43-52. doi:10.1111/iwj.12816.
14. Guest JF, Fuller GW, Vowden P. Venous leg ulcer management in clinical practice in the UK: costs and outcomes. *Int Wound J*. 2018;15(1):29-37. doi:10.1111/iwj.12814.
15. Guest JF, Fuller GW, Vowden P, Vowden KR. Cohort study evaluating pressure ulcer management in clinical practice in the UK following initial presentation in the community: costs and outcomes. *BMJ Open*. 2018;8(7):e021769. doi:10.1136/bmjopen-2018-021769.
16. Guest JF, Fuller GW, Vowden P. Costs and outcomes in evaluating management of unhealed surgical wounds in the community in clinical practice in the UK: a cohort study. *BMJ Open*. 2018;8(12):e022591. doi:10.1136/bmjopen-2018-022591.
17. Alderwick H, Robertson R, Appleby J, Dunn P, Maguire D. Better value in the NHS. The role of changes in clinical practice. 2015. [www.kingsfund.org.uk](http://www.kingsfund.org.uk).
18. Blak BT, Thompson M, Dattani H, Bourke A. Generalisability of The Health Improvement Network (THIN) database: demographics, chronic disease prevalence and mortality rates. *Inform Prim Care*. 2011;19(4):251-5.
19. NHS Digital. Read Codes. 2018. <https://digital.nhs.uk/article/1104/Read-Codes>. Accessed 10 March 2018.
20. Curtis L, Burns A. Unit Costs of Health and Social Care 2019. University of Kent, Personal Social Services Research Unit, Canterbury. 2019. <https://www.pssru.ac.uk/project-pages/unit-costs/unit-costs-2019/>. Accessed 1 July 2020.
21. Department of Health. National Schedule of NHS reference costs 2018/19. <https://improvement.nhs.uk/resources/reference-costs>. Accessed 1 July 2020.
22. Drug Tariff. Drug Tariff. 2019. <https://www.drugtariff.co.uk>. Accessed 1 July 2020.
23. Office for National Statistics. 2017. <https://www.ons.gov.uk/peoplepopulationandcommunity/populationandmigration/populationestimates/datasets/populationestimatesforukenglandandwalesandnorthernireland>.
24. Diabetes UK. Facts and Figures. 2019. <https://www.diabetes.org.uk/professionals/position-statements-reports/statistics>.
25. React to red skin. <http://www.reactoredskin.co.uk/>.

- 1  
2  
3 26. Lo ZJ, Lim X, Eng D, Car J, Hong Q, Yong E et al. Clinical and economic burden of  
4 wound care in the tropics: a 5-year institutional population health review. *Int Wound J*.  
5 2020;17(3):790-803. doi:10.1111/iwj.13333.  
6  
7  
8 27. Arthritis Research UK. The Nation's Joint Problem. 2017.  
9 <https://www.arthritisresearch.org.uk>.  
10  
11 28. Guest JF, Taylor RR, Vowden K, Vowden P. Relative cost-effectiveness of a skin  
12 protectant in managing venous leg ulcers in the UK. *J Wound Care*. 2012;21(8):389-98.  
13 doi:10.12968/jowc.2012.21.8.389.  
14  
15 29. Guest JF, Ayoub N, Greaves T. Clinical outcomes and cost-effectiveness of an externally  
16 applied electroceutical device in managing venous leg ulcers in clinical practice in the UK. *J*  
17 *Wound Care*. 2015;24(12):572-80. doi:10.12968/jowc.2015.24.12.572.  
18  
19 30. Scottish Intercollegiate Guidelines Network. SIGN guideline 120: management of chronic  
20 venous leg ulcers. 2010. 2010. <http://sign.ac.uk/pdf/sign120.pdf>.  
21  
22 31. National Institute for Health and Care Excellence (NICE). Diabetic foot problems:  
23 prevention and management. NICE guidelines [NG19] 2015. 2015. [https://](https://nice.org.uk/guidance/ng19)  
24 [nice.org.uk/guidance/ng19](https://nice.org.uk/guidance/ng19). Accessed 30 November 2016.  
25  
26 32. NHS England. The NHS Long Term Plan. 2019. <https://www.longtermplan.nhs.uk/>.  
27  
28 33. Kneale D, Khatwa M, Thomas J. Identifying and appraising promising sources of UK  
29 clinical, health and social care data for use by NICE. 2016.  
30 <https://eppi.ioe.ac.uk/cms/Default.aspx?tabid=3673>.  
31  
32 34. Office for NaTIONAL Statistics. Employee earnings in the UK: 2018. 2018.  
33 [https://www.ons.gov.uk/employmentandlabourmarket/peopleinwork/earningsandworkinghou](https://www.ons.gov.uk/employmentandlabourmarket/peopleinwork/earningsandworkinghours/bulletins/annualsurveyofhoursandearnings/2018)  
34 [rs/bulletins/annualsurveyofhoursandearnings/2018](https://www.ons.gov.uk/employmentandlabourmarket/peopleinwork/earningsandworkinghours/bulletins/annualsurveyofhoursandearnings/2018).  
35  
36 35. Office for National Statistics. Unemployment. 2018.  
37 <https://www.ons.gov.uk/employmentandlabourmarket/peoplenotinwork/unemployment>.  
38  
39 36. Weidlich D, Andersson FL, Oelke M, Drake MJ, Jonasson AF, Guest JF. Annual direct  
40 and indirect costs attributable to nocturia in Germany, Sweden, and the UK. *Eur J Health*  
41 *Econ*. 2017;18(6):761-71. doi:10.1007/s10198-016-0826-x.  
42  
43  
44  
45  
46  
47  
48  
49  
50  
51  
52  
53  
54  
55  
56  
57  
58  
59  
60

**Table 1: Annual number of adult patients with a wound and prevalence of different wound types in the UK. Percentage of total number in parentheses.**

|                         | Annual number of patients with a wound in 2017/18 (thousands) | Annual prevalence among the adult UK population in 2017/18 | Annual number of patients with a wound in 2012/13 (thousands) [1] | Percentage change in the annual number of patients with a wound between 2012/13 and 2017/18 |
|-------------------------|---------------------------------------------------------------|------------------------------------------------------------|-------------------------------------------------------------------|---------------------------------------------------------------------------------------------|
| Abscess                 | 293,000 (8%)                                                  | 0.0056                                                     | 160,000 (7%)                                                      | 83%                                                                                         |
| Burn                    | 222,000 (6%)                                                  | 0.0043                                                     | 87,000 (4%)                                                       | 155%                                                                                        |
| Diabetic foot ulcer     | 326,000 (9%)                                                  | 0.0063                                                     | 169,000 (8%)                                                      | 93%                                                                                         |
| Leg ulcer (arterial)    | 31,000 (1%)                                                   | 0.0022                                                     | 9,000 (<1%)                                                       | 244%                                                                                        |
| Leg ulcer (mixed)       | 102,000 (3%)                                                  | 0.0003                                                     | 24,000 (1%)                                                       | 325%                                                                                        |
| Leg ulcer (unspecified) | 361,000 (9%)                                                  | 0.0069                                                     | 420,000 (19%)                                                     | -14%                                                                                        |
| Leg ulcer (venous)      | 560,000 (15%)                                                 | 0.0108                                                     | 278,000 (13%)                                                     | 101%                                                                                        |
| Open wound              | 337,000 (9%)                                                  | 0.0065                                                     | 240,000 (11%)                                                     | 40%                                                                                         |
| Pressure ulcer          | 202,000 (5%)                                                  | 0.0039                                                     | 153,000 (7%)                                                      | 32%                                                                                         |
| Surgical wound          | 519,000 (14%)                                                 | 0.0100                                                     | 253,000 (11%)                                                     | 105%                                                                                        |
| Trauma                  | 249,000 (7%)                                                  | 0.0048                                                     | 158,000 (7%)                                                      | 58%                                                                                         |
| Unspecified             | 600,000 (16%)                                                 | 0.0115                                                     | 271,000 (12%)                                                     | 121%                                                                                        |
| <b>TOTAL</b>            | <b>3,802,000 (100%)</b>                                       | <b>0.0730</b>                                              | <b>2,222,000 (100%)</b>                                           | <b>71%</b>                                                                                  |

**Table 2: Patients' baseline characteristics.** \*Other acute wounds comprise abscesses, burns and traumatic wounds. \*\*Other chronic wounds comprise arterial, mixed and unspecified leg ulcers. Full details are available in supplementary Table S2.

|                                                          | Diabetic foot<br>ulcer | Leg ulcer<br>(venous) | Open<br>wound | Pressure<br>ulcer | Surgical<br>wound | Unspecified | Other acute<br>wounds* | Other chronic<br>wounds** | All<br>wounds |
|----------------------------------------------------------|------------------------|-----------------------|---------------|-------------------|-------------------|-------------|------------------------|---------------------------|---------------|
| Mean age per patient<br>(years)                          | 62.3                   | 70.9                  | 53.4          | 76.1              | 55.4              | 55.9        | 48.4                   | 55.9                      | 57.9          |
| Percentage male                                          | 51%                    | 48%                   | 40%           | 40%               | 42%               | 49%         | 40%                    | 42%                       | 44%           |
| Percentage smoker                                        | 11%                    | 7%                    | 18%           | 7%                | 19%               | 22%         | 23%                    | 18%                       | 17%           |
| Percentage ex-smoker                                     | 37%                    | 44%                   | 29%           | 40%               | 29%               | 28%         | 20%                    | 24%                       | 30%           |
| Percentage non-<br>smoker                                | 52%                    | 48%                   | 51%           | 40%               | 52%               | 49%         | 55%                    | 58%                       | 52%           |
| Percentage with<br>unknown smoking<br>status             | 0%                     | 0%                    | 2%            | 13%               | 1%                | 1%          | 1%                     | 0%                        | 1%            |
| Mean body mass index<br>per patient (kg/m <sup>2</sup> ) | 30.9                   | 31.5                  | 29.6          | 24.5              | 28.3              | 28.9        | 28.6                   | 28.6                      | 29.1          |
| Percentage with new<br>wounds in the study<br>period     | 61%                    | 59%                   | 87%           | 80%               | 77%               | 80%         | 81%                    | 62%                       | 73%           |
| Percentage of all<br>wounds with a<br>recorded infection | 78%                    | 41%                   | 94%           | 13%               | 35%               | 1%          | 24%                    | 63%                       | 40%           |

**Table 3: Percentage of patients with a comorbidity in the year before the start of their wound.** Those with diabetes are a subset of those with endocrinological comorbidities. \*Other acute wounds comprise abscesses, burns and traumatic wounds. \*\*Other chronic wounds comprise arterial, mixed and unspecified leg ulcers. Full details are available in supplementary Table S3.

|                                             | Diabetic<br>foot ulcer | Leg ulcer<br>(venous) | Open<br>wound | Pressure<br>ulcer | Surgical<br>wound | Unspecified | Other acute<br>wounds* | Other chronic<br>wounds** | All wounds |
|---------------------------------------------|------------------------|-----------------------|---------------|-------------------|-------------------|-------------|------------------------|---------------------------|------------|
| Cardiovascular                              | 70%                    | 78%                   | 44%           | 53%               | 47%               | 51%         | 36%                    | 54%                       | 53%        |
| Dermatological                              | 60%                    | 41%                   | 51%           | 40%               | 51%               | 45%         | 51%                    | 52%                       | 49%        |
| Endocrinological                            | 99%                    | 52%                   | 69%           | 60%               | 63%               | 57%         | 54%                    | 38%                       | 60%        |
| Diabetes                                    | 100%                   | 37%                   | 67%           | 60%               | 59%               | 52%         | 51%                    | 34%                       | 57%        |
| Gastroenterological                         | 42%                    | 19%                   | 34%           | 47%               | 37%               | 35%         | 31%                    | 32%                       | 33%        |
| Genito-urinary                              | 28%                    | 19%                   | 25%           | 27%               | 28%               | 24%         | 23%                    | 23%                       | 24%        |
| Immunological                               | 13%                    | 11%                   | 10%           | 7%                | 9%                | 9%          | 8%                     | 6%                        | 9%         |
| Malnutrition                                | 2%                     | 4%                    | 1%            | 13%               | 1%                | 3%          | 1%                     | 4%                        | 3%         |
| Musculoskeletal                             | 62%                    | 59%                   | 49%           | 73%               | 57%               | 56%         | 48%                    | 62%                       | 56%        |
| Neurological                                | 24%                    | 33%                   | 18%           | 67%               | 22%               | 17%         | 18%                    | 24%                       | 24%        |
| Oncological                                 | 25%                    | 7%                    | 14%           | 27%               | 18%               | 19%         | 15%                    | 17%                       | 16%        |
| Ophthalmological                            | 20%                    | 4%                    | 11%           | 33%               | 13%               | 10%         | 11%                    | 15%                       | 12%        |
| Psychiatric                                 | 39%                    | 15%                   | 35%           | 33%               | 35%               | 35%         | 39%                    | 47%                       | 35%        |
| Renal                                       | 30%                    | 30%                   | 12%           | 40%               | 14%               | 16%         | 7%                     | 18%                       | 18%        |
| Respiratory                                 | 45%                    | 33%                   | 36%           | 33%               | 38%               | 37%         | 39%                    | 43%                       | 38%        |
| Mean number of<br>comorbidities per patient | 5.7                    | 4.0                   | 4.1           | 5.6               | 4.3               | 4.2         | 3.8                    | 4.4                       | 4.1        |

**Table 4: Healing rates in the study period.** \*Other acute wounds comprise abscesses, burns and traumatic wounds. \*\*Other chronic wounds comprise arterial, mixed and unspecified leg ulcers. Full details are available in supplementary Table S4.

|                                                        | Diabetic foot ulcer | Leg ulcer (venous) | Open wound | Pressure ulcer | Surgical wound | Unspecified | Other acute wounds* | Other chronic wounds** | All wounds |
|--------------------------------------------------------|---------------------|--------------------|------------|----------------|----------------|-------------|---------------------|------------------------|------------|
| Wounds that healed in the study period                 | 52%                 | 37%                | 90%        | 60%            | 85%            | 85%         | 88%                 | 49%                    | 70%        |
| New wounds that healed in the study period             | 60%                 | 56%                | 90%        | 75%            | 86%            | 88%         | 86%                 | 36%                    | 76%        |
| Existing wounds that healed in the study period        | 40%                 | 9%                 | 90%        | 0%             | 80%            | 73%         | 93%                 | 77%                    | 56%        |
| Wounds that healed with no evidence of infection       | 57%                 | 50%                | 93%        | 62%            | 87%            | 86%         | 91%                 | 54%                    | 77%        |
| Wounds that healed with recorded evidence of infection | 50%                 | 18%                | 89%        | 50%            | 81%            | 38%         | 78%                 | 46%                    | 60%        |
| Wounds that healed among smokers                       | 33%                 | 25%                | 88%        | 33%            | 82%            | 85%         | 89%                 | 43%                    | 64%        |
| Wounds that healed among ex-smokers                    | 53%                 | 39%                | 88%        | 67%            | 83%            | 88%         | 87%                 | 48%                    | 70%        |
| Wounds that healed among non-smokers                   | 56%                 | 38%                | 93%        | 75%            | 88%            | 84%         | 90%                 | 52%                    | 74%        |

**Table 5: Percentage of patients who utilised resources in the study year.** †Includes tissue viability nurses and diabetic nurse specialists. \*Other acute wounds comprise abscesses, burns and traumatic wounds. \*\*Other chronic wounds comprise arterial, mixed and unspecified leg ulcers. Full details are available in supplementary Table S5.

|                                                         | Diabetic foot ulcer | Leg ulcer (venous) | Open wound | Pressure ulcer | Surgical wound | Unspecified | Other acute wounds* | Other chronic wounds** | All wounds |
|---------------------------------------------------------|---------------------|--------------------|------------|----------------|----------------|-------------|---------------------|------------------------|------------|
| District/community nurse visits                         | 96%                 | 85%                | 24%        | 60%            | 46%            | 44%         | 34%                 | 85%                    | 38%        |
| Healthcare assistant visits                             | 93%                 | 81%                | 21%        | 40%            | 46%            | 44%         | 25%                 | 87%                    | 36%        |
| Practice nurse visits                                   | 94%                 | 96%                | 97%        | 93%            | 97%            | 98%         | 96%                 | 85%                    | 97%        |
| GP office visits                                        | 97%                 | 100%               | 90%        | 93%            | 82%            | 62%         | 89%                 | 100%                   | 84%        |
| Dressings                                               | 100%                | 100%               | 100%       | 100%           | 100%           | 100%        | 100%                | 100%                   | 100%       |
| Compression bandaging/ hosiery                          | 15%                 | 93%                | 5%         | 0%             | 3%             | 6%          | 2%                  | 40%                    | 6%         |
| Prescribed analgesics/non-steroidal anti-inflammatories | 57%                 | 81%                | 12%        | 53%            | 24%            | 20%         | 17%                 | 46%                    | 21%        |
| Prescribed antibiotics                                  | 92%                 | 81%                | 81%        | 67%            | 43%            | 26%         | 56%                 | 86%                    | 50%        |
| Hospital outpatient visits with a nurse                 | 35%                 | 37%                | 8%         | 0%             | 18%            | 31%         | 15%                 | 20%                    | 17%        |
| Accident & emergency attendances                        | 23%                 | 30%                | 8%         | 7%             | 8%             | 4%          | 13%                 | 11%                    | 8%         |
| Hospital admissions without surgery                     | 4%                  | 7%                 | 7%         | 13%            | 8%             | 8%          | 7%                  | 4%                     | 7%         |
| Hospital outpatient visits with a physician/surgeon     | 15%                 | 7%                 | 4%         | 20%            | 8%             | 1%          | 4%                  | 9%                     | 5%         |
| GP home visits                                          | 2%                  | 11%                | 1%         | 13%            | 2%             | 1%          | 2%                  | 2%                     | 2%         |
| Diagnostic tests                                        | 3%                  | 0%                 | 1%         | 0%             | 2%             | 3%          | 1%                  | 4%                     | 2%         |
| Ambulance services                                      | 3%                  | 4%                 | 0%         | 0%             | 1%             | 1%          | 0%                  | 1%                     | 1%         |
| Hospital admissions with surgery                        | 2%                  | 0%                 | 0%         | 0%             | 6%             | 0%          | 2%                  | 0%                     | 2%         |
| Specialist nurse visits†                                | 3%                  | 0%                 | 0%         | 7%             | 1%             | 1%          | 0%                  | 2%                     | 1%         |
| Podiatrist visits                                       | 3%                  | 0%                 | 1%         | 7%             | 1%             | 0%          | 1%                  | 6%                     | 1%         |
| Day Cases                                               | 0%                  | 0%                 | 0%         | 0%             | 1%             | <1%         | 0%                  | 0%                     | <1%        |



**Table 6: Annual amount of NHS resource use attributable to managing 3.8 million patients with a wound (thousands).** †Includes tissue viability nurses and diabetic nurse specialists.

|                                                     | Abscess | Burn    | Diabetic foot ulcer | Leg ulcer (arterial) | Leg ulcer (mixed) | Leg ulcer (unspecified) | Leg ulcer (venous) | Open wound | Pressure ulcer | Surgical wound | Trauma  | Unspecified | All wounds |
|-----------------------------------------------------|---------|---------|---------------------|----------------------|-------------------|-------------------------|--------------------|------------|----------------|----------------|---------|-------------|------------|
| District/community nurse visits                     | 1069.31 | 2124.01 | 10443.18            | 895.38               | 4411.41           | 6093.17                 | 17459.02           | 797.34     | 5789.24        | 2791.44        | 234.97  | 2305.39     | 54413.86   |
| Healthcare assistant visits                         | 1111.38 | 1283.91 | 10641.73            | 1020.07              | 4671.18           | 6946.81                 | 17619.78           | 804.15     | 3839.82        | 3047.33        | 238.16  | 2423.08     | 53647.40   |
| Practice nurse visits                               | 745.32  | 484.97  | 3428.04             | 187.60               | 1938.34           | 1278.84                 | 14461.10           | 545.16     | 1128.81        | 1217.10        | 290.62  | 2356.74     | 28062.63   |
| GP office visits                                    | 632.13  | 382.27  | 2436.59             | 115.97               | 1173.09           | 1102.64                 | 9855.13            | 497.20     | 1196.00        | 983.00         | 292.53  | 1424.03     | 20090.58   |
| Dressings                                           | 7383.46 | 5580.89 | 51475.28            | 4007.17              | 19817.92          | 26030.08                | 79863.80           | 6759.11    | 9467.04        | 27172.85       | 4028.25 | 22913.59    | 264499.43  |
| Compression bandaging/hosiery                       | 160.32  | 62.52   | 588.14              | 0.00                 | 1691.43           | 258.85                  | 27259.29           | 239.70     | 0.00           | 260.19         | 0.00    | 407.91      | 30928.35   |
| Prescribed medication                               | 827.59  | 235.79  | 2948.13             | 242.17               | 1473.18           | 1787.04                 | 5498.12            | 641.18     | 1760.41        | 922.26         | 177.91  | 1359.55     | 17873.33   |
| Hospital outpatient visits with a nurse             | 171.46  | 171.49  | 583.20              | 20.47                | 709.31            | 190.11                  | 3672.33            | 43.82      | 0.00           | 286.86         | 18.26   | 600.07      | 6467.37    |
| Accident & emergency attendances                    | 57.15   | 46.44   | 150.74              | 10.23                | 47.74             | 19.01                   | 248.97             | 30.40      | 40.32          | 57.93          | 13.23   | 35.83       | 758.00     |
| Hospital admissions without surgery                 | 24.01   | 17.86   | 19.77               | 0.00                 | 3.41              | 19.01                   | 62.24              | 33.98      | 26.88          | 60.74          | 23.30   | 78.81       | 370.01     |
| Hospital outpatient visits with a physician/surgeon | 18.29   | 0.00    | 61.78               | 6.82                 | 10.23             | 28.52                   | 41.50              | 14.31      | 40.32          | 40.18          | 18.26   | 5.37        | 285.57     |
| GP home visits                                      | 5.72    | 7.15    | 14.83               | 0.00                 | 17.05             | 0.00                    | 62.24              | 5.37       | 40.32          | 11.21          | 1.89    | 24.18       | 189.95     |
| Diagnostic tests                                    | 1.14    | 3.57    | 17.30               | 0.00                 | 30.69             | 47.53                   | 0.00               | 3.58       | 0.00           | 14.02          | 2.83    | 23.29       | 143.95     |
| Ambulance services                                  | 2.29    | 0.00    | 9.89                | 0.00                 | 3.41              | 0.00                    | 41.50              | 0.00       | 0.00           | 4.67           | 0.00    | 5.37        | 67.12      |
| Hospital admissions with surgery                    | 4.57    | 3.57    | 4.94                | 0.00                 | 0.00              | 0.00                    | 0.00               | 0.00       | 0.00           | 34.57          | 3.46    | 0.00        | 51.12      |
| Specialist nurse visits†                            | 0.00    | 0.00    | 17.30               | 0.00                 | 10.23             | 0.00                    | 0.00               | 0.00       | 13.44          | 0.93           | 0.00    | 3.74        | 45.64      |
| Podiatrist visits                                   | 2.29    | 0.00    | 9.89                | 13.64                | 17.05             | 0.00                    | 0.00               | 0.89       | 13.44          | 1.87           | 0.32    | 0.00        | 59.38      |
| Day Cases                                           | 1.14    | 0.00    | 0.00                | 0.00                 | 0.00              | 0.00                    | 0.00               | 0.00       | 0.00           | 1.87           | 0.00    | 0.90        | 3.91       |

**Table 7: Use of Doppler in patients with an ulcer of the lower limb to measure ankle brachial pressure index (ABPI).**

| Ulcer type            | Percentage who had a Doppler | Percentage who did not have a Doppler | Percentage of these who were prescribed a compression bandage/hosiery |
|-----------------------|------------------------------|---------------------------------------|-----------------------------------------------------------------------|
| Venous leg ulcer      | 59%                          | 41%                                   | 88%                                                                   |
| Arterial leg ulcer    | 22%                          | 78%                                   | 0%                                                                    |
| Mixed Leg ulcer       | 27%                          | 73%                                   | 100%                                                                  |
| Unspecified leg ulcer | 0%                           | 100%                                  | 0%                                                                    |
| Diabetic foot ulcer   | 8%                           | 92%                                   | 50%                                                                   |
| All lower limb ulcers | 15%                          | 85%                                   | 75%                                                                   |

**Table 8: Annual cost of NHS resource use attributable to managing 3.8 million patients with a wound (£ million at 2017/18 prices).**

Percentage of total cost in parentheses. †Includes tissue viability nurses and diabetic nurse specialists. \*Based on 100 bootstrapped samples.

|                                                     | Abscess        | Burn           | Diabetic foot ulcer | Leg ulcer (arterial) | Leg ulcer (mixed) | Leg ulcer (unspecified) | Leg ulcer (venous) | Open wound     | Pressure ulcer | Surgical wound | Trauma        | Unspecified    | Total                   |
|-----------------------------------------------------|----------------|----------------|---------------------|----------------------|-------------------|-------------------------|--------------------|----------------|----------------|----------------|---------------|----------------|-------------------------|
| District/community nurse visits                     | £48.12         | £95.58         | £469.94             | £40.29               | £198.51           | £274.19                 | £785.66            | £35.88         | £260.52        | £125.61        | £10.57        | £103.74        | £2,448.61 (29%)         |
| GP office visits                                    | £46.78         | £28.29         | £180.31             | £8.58                | £86.81            | £81.60                  | £729.28            | £36.79         | £88.50         | £72.74         | £21.65        | £105.38        | £1,486.71 (18%)         |
| Healthcare assistant visits                         | £28.90         | £33.38         | £276.69             | £26.52               | £121.45           | £180.62                 | £458.11            | £20.91         | £99.84         | £79.23         | £6.19         | £63.00         | £1,394.84 (17%)         |
| Hospital admissions without surgery                 | £30.25         | £22.51         | £24.91              | £0.00                | £11.06            | £61.67                  | £201.92            | £42.82         | £33.86         | £76.53         | £29.36        | £99.31         | £634.20 (8%)            |
| Hospital outpatient visits with a nurse             | £16.65         | £16.66         | £56.65              | £1.99                | £68.90            | £18.47                  | £356.69            | £4.26          | £0.00          | £27.86         | £1.77         | £58.28         | £628.18 (8%)            |
| Practice nurse visits                               | £15.65         | £10.18         | £71.99              | £3.94                | £40.71            | £26.86                  | £303.68            | £11.45         | £23.71         | £25.56         | £6.10         | £49.49         | £589.32 (7%)            |
| Wound care products                                 | £10.81         | £12.65         | £92.48              | £5.80                | £38.14            | £39.24                  | £225.10            | £10.68         | £19.05         | £33.57         | £5.50         | £38.36         | £531.38 (6%)            |
| Prescribed medication                               | £12.90         | £3.68          | £45.55              | £3.74                | £22.67            | £27.76                  | £84.36             | £10.00         | £27.09         | £14.30         | £2.79         | £20.90         | £275.74 (3%)            |
| Hospital admissions with surgery                    | £9.67          | £13.38         | £20.69              | £0.00                | £0.00             | £0.00                   | £0.00              | £0.00          | £0.00          | £73.12         | £7.33         | £0.00          | £124.19 (1%)            |
| Accident & emergency attendances                    | £9.16          | £7.44          | £24.15              | £1.64                | £7.65             | £3.05                   | £39.89             | £4.87          | £6.46          | £9.28          | £2.12         | £5.74          | £121.45 (1%)            |
| Hospital outpatient visits with a physician/surgeon | £2.44          | £0.00          | £8.23               | £0.91                | £1.36             | £3.80                   | £5.53              | £1.91          | £5.37          | £5.35          | £2.43         | £0.72          | £38.05 (<1%)            |
| GP home visits                                      | £0.69          | £0.87          | £1.80               | £0.00                | £2.07             | £0.00                   | £7.56              | £0.65          | £4.90          | £1.36          | £0.23         | £2.94          | £23.07 (<1%)            |
| Ambulance services                                  | £0.35          | £0.00          | £1.49               | £0.00                | £0.52             | £0.00                   | £6.27              | £0.00          | £0.00          | £0.71          | £0.00         | £0.81          | £10.15 (<1%)            |
| Podiatrist visits                                   | £0.31          | £0.00          | £1.34               | £1.85                | £2.31             | £0.00                   | £0.00              | £0.12          | £1.82          | £0.25          | £0.04         | £0.00          | £8.04 (<1%)             |
| Day Cases                                           | £0.84          | £0.00          | £0.00               | £0.00                | £0.00             | £0.00                   | £0.00              | £0.00          | £0.00          | £1.37          | £0.00         | £0.66          | £2.87 (<1%)             |
| Specialist nurse visits†                            | £0.00          | £0.00          | £1.11               | £0.00                | £0.66             | £0.00                   | £0.00              | £0.00          | £0.86          | £0.06          | £0.00         | £0.24          | £2.93 (<1%)             |
| Diagnostic tests                                    | £0.00          | £0.01          | £0.03               | £0.00                | £0.06             | £0.09                   | £0.00              | £0.01          | £0.00          | £0.03          | £0.01         | £0.04          | £0.28 (<1%)             |
| <b>TOTAL COST</b>                                   | <b>£233.52</b> | <b>£244.63</b> | <b>£1,277.36</b>    | <b>£95.26</b>        | <b>£602.88</b>    | <b>£717.35</b>          | <b>£3,204.05</b>   | <b>£180.35</b> | <b>£571.98</b> | <b>£546.93</b> | <b>£96.09</b> | <b>£549.61</b> | <b>£8,320.01 (100%)</b> |
| 95% confidence limits                               | £233.17;       | £233.97;       | £1,250.56;          | £86.78;              | £563.53;          | £704.66;                | £2,973.68;         | £175.64;       | £501.67;       | £540.69;       | £93.10;       | £539.47;       | £7,896.93;              |
| around the total cost*                              | £241.31        | £253.68        | £1,292.10           | £97.85               | £594.45           | £740.45                 | £3,261.84          | £182.46        | £577.57        | £555.76        | £97.87        | £571.17        | £8,466.51               |

**Table 9: Annual amount and corresponding cost (at 2017/18 prices) of NHS resource use attributable to managing 3.8 million patients with a wound, stratified by healing.** †Includes tissue viability nurses and diabetic nurse specialists.

|                                                                             | Annual number (thousand) |           |                                           | Annual cost of wounds (£ million) |                  |                                            |
|-----------------------------------------------------------------------------|--------------------------|-----------|-------------------------------------------|-----------------------------------|------------------|--------------------------------------------|
|                                                                             | Healed                   | Unhealed  | Percentage difference in resource use (%) | Healed                            | Unhealed         | Percentage difference in resource cost (%) |
| Number of patients with a wound                                             | 2,677.00                 | 1,125.00  |                                           |                                   |                  |                                            |
| Ambulance services                                                          | 4.51                     | 62.61     | 1288%                                     | £0.68                             | £9.47            | 1293%                                      |
| Hospital outpatient visits                                                  | 1,286.86                 | 5,466.09  | 325%                                      | £130.85                           | £535.38          | 309%                                       |
| Practice nurse visits                                                       | 7,430.80                 | 20,631.83 | 178%                                      | £156.05                           | £433.27          | 178%                                       |
| GP visits                                                                   | 5,460.16                 | 14,820.36 | 171%                                      | £407.22                           | £1,102.56        | 171%                                       |
| Podiatrist visits                                                           | 16.11                    | 43.27     | 169%                                      | £2.18                             | £5.86            | 169%                                       |
| Prescribed medication                                                       | 5,593.33                 | 12,280.00 | 120%                                      | £86.72                            | £189.02          | 118%                                       |
| Accident & Emergency attendances                                            | 238.34                   | 519.66    | 118%                                      | £38.19                            | £83.26           | 118%                                       |
| District/community nurse visits                                             | 18,342.87                | 36,070.99 | 97%                                       | £825.59                           | £1,623.02        | 97%                                        |
| Wound care products (dressings/bandages/hosiery/creams/ointments/tapes etc) |                          |           |                                           | £181.06                           | £350.32          | 93%                                        |
| Healthcare assistant visits                                                 | 18,816.65                | 34,830.75 | 85%                                       | £489.23                           | £905.61          | 85%                                        |
| Specialist nurse visits†                                                    | 21.12                    | 24.52     | 16%                                       | £1.35                             | £1.58            | 17%                                        |
| Hospital admissions & day cases                                             | 286.73                   | 138.31    | -52%                                      | £427.89                           | £333.37          | -22%                                       |
| Diagnostic tests                                                            | 86.89                    | 57.06     | -34%                                      | £0.19                             | £0.09            | -53%                                       |
| <b>TOTAL</b>                                                                |                          |           |                                           | <b>£2,747.20</b>                  | <b>£5,572.81</b> | <b>103%</b>                                |

**Table 10: Total annual NHS cost (at 2017/18 prices) of wound care attributable to managing 3.8 million patients with a wound and cost per patient, stratified by healing.**

|                         | Total NHS Cost for all patients (£ million) |                 | Mean annual NHS cost per patient |                |
|-------------------------|---------------------------------------------|-----------------|----------------------------------|----------------|
|                         | Healed wounds                               | Unhealed wounds | Healed wounds                    | Unhealed wound |
| Abscess                 | 152.12                                      | 81.40           | £604.88                          | £1,977.94      |
| Burn                    | 140.23                                      | 104.40          | £754.81                          | £2,922.16      |
| Diabetic foot ulcer     | 490.11                                      | 787.25          | £2,874.36                        | £5,056.71      |
| Leg ulcer (arterial)    | 53.70                                       | 41.56           | £2,623.83                        | £4,061.31      |
| Leg ulcer (mixed)       | 143.77                                      | 459.11          | £4,684.15                        | £6,411.01      |
| Leg ulcer (unspecified) | 379.58                                      | 337.77          | £1,901.79                        | £2,089.98      |
| Leg ulcer (venous)      | 422.56                                      | 2781.49         | £2,036.67                        | £7,886.05      |
| Open wound              | 127.51                                      | 52.84           | £421.83                          | £1,515.03      |
| Pressure ulcer          | 90.44                                       | 481.54          | £747.75                          | £5,972.28      |
| Surgical wound          | 389.92                                      | 157.01          | £884.11                          | £2,024.49      |
| Trauma                  | 83.78                                       | 12.31           | £358.09                          | £831.63        |
| Unspecified             | 273.48                                      | 276.13          | £533.82                          | £3,146.03      |

| Read Code | Description                                           |
|-----------|-------------------------------------------------------|
| 2924      | O/E - trophic skin ulceration                         |
| 2924.00   | O/E - trophic skin ulceration                         |
| 3511      | Surgical biopsy taken                                 |
| 3511.00   | Surgical biopsy taken                                 |
| 8343.00   | Immobilisation of wound                               |
| 14F3.00   | H/O: chronic skin ulcer                               |
| 14F4.00   | H/O: Admission in last year for diabetes foot problem |
| 14F5.00   | H/O: venous leg ulcer                                 |
| 14F6.00   | H/O: foot ulcer                                       |
| 14F7.00   | H/O: arterial lower limb ulcer                        |
| 22L..00   | O/E - wound healing                                   |
| 22L1.00   | O/E - Wound healed                                    |
| 22L2.00   | O/E - Wound healing well                              |
| 22L3.00   | O/E - Wound healing badly                             |
| 22L3.11   | O/E wound healing delayed                             |
| 22L4.00   | O/E - Wound infected                                  |
| 22L5.00   | O/E - protruding suture                               |
| 22L6.00   | O/E - wound necrotic                                  |
| 22Q..00   | Wound observation                                     |
| 22Q0.00   | Length of wound                                       |
| 22Q1.00   | Width of wound                                        |
| 22Q3.00   | Wound dirty                                           |
| 22Q4.00   | Depth of wound                                        |
| 22Q6.00   | Wound discharge                                       |
| 22Q8.00   | Critical colonisation of wound                        |
| 22Q9.00   | Traumatic wound                                       |
| 22QA.00   | Surgical wound                                        |
| 22QB.00   | Fungating wound                                       |
| 26B8.00   | O/E - ulcerated breast lesion                         |
| 26B8.11   | O/E - ulcer on breast                                 |
| 2Fb..00   | Granulation of tissue                                 |
| 2FF..00   | O/E - skin ulcer                                      |
| 2FF1.00   | O/E - no skin ulcer                                   |
| 2FF2.00   | O/E - skin ulcer present                              |
| 2FF3.00   | O/E - depth of ulcer                                  |
| 2FFZ.00   | O/E - skin ulcer NOS                                  |
| 2FG7.00   | O/E - healed burn scar                                |
| 2FI..00   | O/E - sinus in skin                                   |
| 2FI2.00   | O/E -skin sinus-post operation                        |
| 2FI3.00   | O/E - skin sinus -after injury                        |
| 2FI4.00   | O/E - suppuration skin sinus                          |
| 2FIZ.00   | O/E - skin sinus NOS                                  |
| 2G48.00   | O/E - ankle ulcer                                     |
| 2G4E.00   | Healed leg ulcer                                      |
| 2G54.00   | O/E - Right foot ulcer                                |
| 2G55.00   | O/E - Left foot ulcer                                 |
| 2G5H.00   | O/E - Right diabetic foot - ulcerated                 |
| 2G5L.00   | O/E - Left diabetic foot - ulcerated                  |
| 2G5Q.00   | O/E - No left foot ulcer                              |

|    |         |                                                              |
|----|---------|--------------------------------------------------------------|
| 1  |         |                                                              |
| 2  | 2G5R.00 | O/E - No right foot ulcer                                    |
| 3  | 2G5S.00 | O/E - right healed foot ulcer                                |
| 4  | 2G5T.00 | O/E - left healed foot ulcer                                 |
| 5  | 2G5V.00 | O/E - right chronic diabetic foot ulcer                      |
| 6  | 2G5W.00 | O/E - left chronic diabetic foot ulcer                       |
| 7  |         |                                                              |
| 8  | 2G63.00 | Ischaemic toe                                                |
| 9  | 2G64.00 | O/E - infected toe                                           |
| 10 | 2I16.00 | O/E - gangrene                                               |
| 11 | 38C4.00 | Leg ulcer assessment                                         |
| 12 | 38N..00 | Wound assessment                                             |
| 13 | 38Qi.00 | SINBAD (site,isch,neuro,bact inf,depth) wound classification |
| 14 | 39C0.00 | Pressure sore                                                |
| 15 | 39C1.00 | Superficial pressure sore                                    |
| 16 | 39C2.00 | Deep pressure sore                                           |
| 17 | 39C3.00 | Pressure sore -deep + superfic                               |
| 18 | 39C4.00 | Waterlow pressure sore risk score                            |
| 19 | 39C4200 | Waterlow major surgery/trauma score                          |
| 20 | 39C5.00 | Medley pressure sore risk score                              |
| 21 | 39C6.00 | Maelor pressure ulcer risk assessment score                  |
| 22 | 39C6.11 | Maelor score                                                 |
| 23 | 39C7.00 | EPUAP (European pressure ulcer advisory panel) grade 1 ulcer |
| 24 | 39C8.00 | EPUAP (European pressure ulcer advisory panel) grade 2 ulcer |
| 25 | 39C9.00 | EPUAP (European pressure ulcer advisory panel) grade 3 ulcer |
| 26 | 39CA.00 | EPUAP (European pressure ulcer advisory panel) grade 4 ulcer |
| 27 | 4I1F.00 | Wound microscopy, culture and sensitivities                  |
| 28 | 4I2D.00 | Wound exudate sample                                         |
| 29 | 4I2D.11 | Wound swab                                                   |
| 30 | 4I2D000 | Wound swab culture positive                                  |
| 31 | 4I2D100 | Wound swab culture negative                                  |
| 32 | 4JG3.00 | Skin ulcer swab taken                                        |
| 33 | 4JG4.00 | Skin wound swab taken                                        |
| 34 | 58C4.00 | Photography of wound                                         |
| 35 | 6AD1.00 | Wound repair review                                          |
| 36 | 7F23400 | Repair of episiotomy                                         |
| 37 | 7F23y00 | Other specified immediate repair of obstetric laceration     |
| 38 | 7F24.00 | Other obstetric operations                                   |
| 39 | 7F24y00 | Other specified other obstetric operation                    |
| 40 | 7F24z00 | Other obstetric operation NOS                                |
| 41 | 7G06.00 | Curettage of lesion of skin                                  |
| 42 | 7G06.11 | Curettage of lesion of skin or subcutaneous tissue           |
| 43 | 7G06.12 | Curettage of lesion of skin including head and neck          |
| 44 | 7G06000 | Curettage and cauterisation of lesion of skin head or neck   |
| 45 | 7G06100 | Curettage and cauterisation of lesion of skin NEC            |
| 46 | 7G06111 | Curettage and cauterisation of skin wart NEC                 |
| 47 | 7G06200 | Curettage of lesion of skin of head or neck NEC              |
| 48 | 7G06300 | Curettage of sinus NEC                                       |
| 49 | 7G06400 | Curettage of wound NEC                                       |
| 50 | 7G06y00 | Other specified curettage of lesion of skin                  |
| 51 | 7G06z00 | Curettage of lesion of skin NOS                              |
| 52 | 7G2C000 | Toilet or clean burnt skin of head or neck                   |
| 53 |         |                                                              |
| 54 |         |                                                              |
| 55 |         |                                                              |
| 56 |         |                                                              |
| 57 |         |                                                              |
| 58 |         |                                                              |
| 59 |         |                                                              |
| 60 |         |                                                              |



|    |         |                                                              |
|----|---------|--------------------------------------------------------------|
| 1  |         |                                                              |
| 2  | 7G2C100 | Toilet or clean burnt skin NEC                               |
| 3  | 7G2C200 | Debridement of burnt skin of head and neck                   |
| 4  | 7G2C300 | Debridement of burnt skin NEC                                |
| 5  | 7G2C400 | Toilet to burnt skin of head or neck NEC                     |
| 6  | 7G2C500 | Tangent excision of burnt skin of head or neck               |
| 7  | 7G2C600 | Tangent excision of burnt skin NEC                           |
| 8  | 7G2CE00 | Removal of slough from burnt skin NEC                        |
| 9  | 7G2CE11 | Escharotomy of burnt skin NEC                                |
| 10 | 7G2CF00 | Cleansing and sterilisation of burnt skin of head or neck    |
| 11 | 7G2CG00 | Dress burnt skin head or neck us vacuum assisted clos device |
| 12 | 7G2CH00 | Cleansing and sterilisation of burnt skin NEC                |
| 13 | 7G2CJ00 | Dressing burnt skin using vacuum assisted closure device NEC |
| 14 | 7G2Cy00 | Other specified toilet to burnt skin                         |
| 15 | 7G2Cz00 | Toilet to burnt skin NOS                                     |
| 16 | 7G2D.00 | Other skin toilet                                            |
| 17 | 7G2D000 | Debridement of skin NEC                                      |
| 18 | 7G2D011 | Debridement of wound of skin NEC                             |
| 19 | 7G2D100 | Debridement of skin of head or neck NEC                      |
| 20 | 7G2D200 | Removal of slough from skin NEC                              |
| 21 | 7G2D300 | Removal of slough from skin of head or neck NEC              |
| 22 | 7G2D400 | Toilet to skin of head or neck NEC                           |
| 23 | 7G2D500 | Cleaning of skin wound NEC                                   |
| 24 | 7G2D600 | Cleaning of skin wound of head or neck                       |
| 25 | 7G2D700 | Cleansing and sterilisation of skin of head or neck NEC      |
| 26 | 7G2D800 | Cleansing and sterilisation of skin NEC                      |
| 27 | 7G2D900 | Dres skin head or neck us vacuum assisted closure device NEC |
| 28 | 7G2DA00 | Dressing of skin using vacuum assisted closure device NEC    |
| 29 | 7G2DB00 | Removal of slough from skin using pressurised fluid jet      |
| 30 | 7G2Dy00 | Other specified toilet to skin                               |
| 31 | 7G2Dz00 | Other toilet to skin NOS                                     |
| 32 | 7G2E.00 | Dressing of skin or wound                                    |
| 33 | 7G2E.11 | Dressing of skin                                             |
| 34 | 7G2E000 | Dressing of burnt skin of head or neck                       |
| 35 | 7G2E100 | Dressing of burnt skin NEC                                   |
| 36 | 7G2E200 | Dressing of skin of head or neck NEC                         |
| 37 | 7G2E300 | Dressing of skin NEC                                         |
| 38 | 7G2E400 | Dressing of skin of head or neck NEC                         |
| 39 | 7G2E500 | Dressing of skin ulcer NEC                                   |
| 40 | 7G2E600 | Attention to dressing of burn of head or neck                |
| 41 | 7G2E700 | Attention to dressing of burnt skin NEC                      |
| 42 | 7G2E800 | Attention to dressing of skin of head or neck NEC            |
| 43 | 7G2E900 | Attention to dressing of skin NEC                            |
| 44 | 7G2EA00 | Two layer compression bandage for skin ulcer                 |
| 45 | 7G2EB00 | Four layer compression bandaging for skin ulcer              |
| 46 | 7G2EC00 | Three layer compression bandage for skin ulcer               |
| 47 | 7G2Ey00 | Other specified dressing of skin                             |
| 48 | 7G2Ez00 | Dressing of skin NOS                                         |
| 49 | 7G2G000 | Dermabrasion of skin of head or neck                         |
| 50 | 7G2G100 | Dermabrasion of skin NEC                                     |
| 51 | 7G2G400 | Refashioning of scar                                         |
| 52 |         |                                                              |
| 53 |         |                                                              |
| 54 |         |                                                              |
| 55 |         |                                                              |
| 56 |         |                                                              |
| 57 |         |                                                              |
| 58 |         |                                                              |
| 59 |         |                                                              |
| 60 |         |                                                              |

|    |         |                                                             |
|----|---------|-------------------------------------------------------------|
| 1  |         |                                                             |
| 2  | 7P23200 | Delivery of rehabilitation for burns                        |
| 3  | 81H..00 | Dressing of wound                                           |
| 4  | 81H1.00 | Dressing of ulcer                                           |
| 5  | 81H2.00 | Dressing of burn                                            |
| 6  | 81H3.00 | Attention to dressing of skin                               |
| 7  | 81H4.00 | Checking dressing of skin                                   |
| 8  | 81H5.00 | Change of dressing                                          |
| 9  | 81Hy.00 | Other wound dressing                                        |
| 10 | 81HZ.00 | Wound dressing NOS                                          |
| 11 | 8BC7.00 | Glueing of wound                                            |
| 12 | 8BN..00 | Treatment of wound with maggots                             |
| 13 | 8C1L.00 | Wound care                                                  |
| 14 | 8C1M.00 | Post-operative wound care                                   |
| 15 | 8C1M.11 | Post-surgical wound care                                    |
| 16 | 8C1Q.00 | Compression hosiery procedure                               |
| 17 | 8C22.00 | Oxygenation of slough                                       |
| 18 | 8C6..00 | Wound dressing requested by accident and emergency service  |
| 19 | 8C7..00 | Suture removal requested by accident and emergency service  |
| 20 | 8CA4T00 | Dietary education for wound healing                         |
| 21 | 8CA4T11 | Dietary advice for wound healing                            |
| 22 | 8Cd9.00 | Advice given about wound care                               |
| 23 | 8CK..00 | Skin care                                                   |
| 24 | 8CMT.00 | Leg ulcer care pathway                                      |
| 25 | 8CS3.00 | Agreeing on leg ulcer treatment plan                        |
| 26 | 8CT1.00 | Leg ulcer compression therapy finished                      |
| 27 | 8CV2.00 | Leg ulcer compression therapy started                       |
| 28 | 8H15.00 | Admit to burns unit                                         |
| 29 | 8H5E.00 | Burns referral                                              |
| 30 | 8HIV.00 | Referral for complex wound care                             |
| 31 | 8HTh.00 | Referral to leg ulcer clinic                                |
| 32 | 9kd..00 | Complex wound care - enhanced services administration       |
| 33 | 9ks..00 | Complex skin ulcer care enhanced services administration    |
| 34 | 9kY..00 | Review of wound repair - enhanced services administration   |
| 35 | 9kY..11 | Review of wound repair                                      |
| 36 | 9N0t.00 | Seen in primary care leg ulcer clinic                       |
| 37 | 9N0z.00 | Seen in burns clinic                                        |
| 38 | 9N2m.00 | Seen by tissue viability nurse specialist                   |
| 39 | 9N7L.00 | Postop wound management gen secondary care done by practice |
| 40 | 9NM5.00 | Attending leg ulcer clinic                                  |
| 41 | A056.00 | Amoebic skin ulceration                                     |
| 42 | A170.00 | Tuberculosis of skin and subcutaneous tissue                |
| 43 | A170z00 | Tuberculosis of skin and subcutaneous tissue NOS            |
| 44 | A3A0500 | Gas gangrene                                                |
| 45 | A3A0600 | Gas gangrene-neck                                           |
| 46 | A3A0700 | Gas gangrene-back                                           |
| 47 | A3A0800 | Gas gangrene-shoulder                                       |
| 48 | A3A0900 | Gas gangrene-arm                                            |
| 49 | A3A0A00 | Gas gangrene-forearm                                        |
| 50 | A3A0B00 | Gas gangrene-hand                                           |
| 51 | A3A0C00 | Gas gangrene-pelvis                                         |

|    |         |                                                       |
|----|---------|-------------------------------------------------------|
| 1  |         |                                                       |
| 2  | A3A0D00 | Gas gangrene-thigh                                    |
| 3  | A3A0E00 | Gas gangrene-leg                                      |
| 4  | A3A0F00 | Gas gangrene-foot                                     |
| 5  | A3A0z00 | Gas gangrene caused by organism NOS                   |
| 6  | A851000 | Aleppo boil                                           |
| 7  | A851100 | Baghdad boil                                          |
| 8  | A851200 | Delhi boil                                            |
| 9  |         |                                                       |
| 10 | A851z00 | Urban cutaneous leishmaniasis NOS                     |
| 11 | A852.00 | Asian desert cutaneous leishmaniasis                  |
| 12 | A853.00 | Ethiopian cutaneous leishmaniasis                     |
| 13 | A854.00 | American cutaneous leishmaniasis                      |
| 14 | A854.11 | Chiclero ulcer                                        |
| 15 | A855.00 | American mucocutaneous leishmaniasis                  |
| 16 | A85z.00 | Leishmaniasis NOS                                     |
| 17 | A86..00 | Trypanosomiasis                                       |
| 18 |         |                                                       |
| 19 | AD40000 | Cutaneous myiasis                                     |
| 20 | AD40100 | Wound myiasis                                         |
| 21 |         |                                                       |
| 22 | C107.11 | Diabetes mellitus with gangrene                       |
| 23 | C107.12 | Diabetes with gangrene                                |
| 24 | C107200 | Diabetes mellitus, adult with gangrene                |
| 25 | C108500 | Insulin dependent diabetes mellitus with ulcer        |
| 26 | C108511 | Type I diabetes mellitus with ulcer                   |
| 27 | C108512 | Type 1 diabetes mellitus with ulcer                   |
| 28 |         |                                                       |
| 29 | C108600 | Insulin dependent diabetes mellitus with gangrene     |
| 30 | C108611 | Type I diabetes mellitus with gangrene                |
| 31 | C108612 | Type 1 diabetes mellitus with gangrene                |
| 32 | C109400 | Non-insulin dependent diabetes mellitus with ulcer    |
| 33 | C109411 | Type II diabetes mellitus with ulcer                  |
| 34 | C109412 | Type 2 diabetes mellitus with ulcer                   |
| 35 |         |                                                       |
| 36 | C109500 | Non-insulin dependent diabetes mellitus with gangrene |
| 37 | C109511 | Type II diabetes mellitus with gangrene               |
| 38 | C109512 | Type 2 diabetes mellitus with gangrene                |
| 39 |         |                                                       |
| 40 | C10E500 | Type 1 diabetes mellitus with ulcer                   |
| 41 | C10E511 | Type I diabetes mellitus with ulcer                   |
| 42 | C10E512 | Insulin dependent diabetes mellitus with ulcer        |
| 43 |         |                                                       |
| 44 | C10E600 | Type 1 diabetes mellitus with gangrene                |
| 45 | C10E611 | Type I diabetes mellitus with gangrene                |
| 46 | C10E612 | Insulin dependent diabetes mellitus with gangrene     |
| 47 |         |                                                       |
| 48 | C10F400 | Type 2 diabetes mellitus with ulcer                   |
| 49 | C10F411 | Type II diabetes mellitus with ulcer                  |
| 50 | C10F500 | Type 2 diabetes mellitus with gangrene                |
| 51 | C10F511 | Type II diabetes mellitus with gangrene               |
| 52 |         |                                                       |
| 53 | F506.00 | Abscess of external ear                               |
| 54 | G732.00 | Peripheral gangrene                                   |
| 55 | G732000 | Gangrene of toe                                       |
| 56 | G732100 | Gangrene of foot                                      |
| 57 | G732200 | Gangrene of finger                                    |
| 58 | G732300 | Gangrene of thumb                                     |
| 59 | G732400 | Gangrene of hand                                      |
| 60 | G830.00 | Varicose veins of the leg with ulcer                  |

|    |         |                                                              |
|----|---------|--------------------------------------------------------------|
| 1  |         |                                                              |
| 2  | G832.00 | Varicose veins of the leg with ulcer and eczema              |
| 3  | G835.00 | Infected varicose ulcer                                      |
| 4  | G837.00 | Venous ulcer of leg                                          |
| 5  | J085000 | Abscess of lip                                               |
| 6  | J085800 | Lip ulcer                                                    |
| 7  | J54..00 | Abscess of anal and rectal regions                           |
| 8  | J54..12 | Rectal abscess                                               |
| 9  | J540.00 | Perianal abscess                                             |
| 10 | J540.11 | Perianal cellulitis                                          |
| 11 | J541.00 | Ischiorectal abscess                                         |
| 12 | J542.00 | Submucous ano-rectal abscess                                 |
| 13 | J543.00 | Pelvi-rectal abscess                                         |
| 14 | J544.00 | Ano-rectal fissure abscess                                   |
| 15 | J545.00 | Intrasphincteric abscess                                     |
| 16 | J546.00 | Rectal abscess                                               |
| 17 | J54z.00 | Ano-rectal abscess NOS                                       |
| 18 | K272000 | Penile abscess                                               |
| 19 | K272100 | Penile boil                                                  |
| 20 | K272200 | Penile carbuncle                                             |
| 21 | K272300 | Cellulitis of penis                                          |
| 22 | K27y500 | Chronic ulcer of penis                                       |
| 23 | K284600 | Fournier's gangrene of scrotum                               |
| 24 | K424000 | Abscess of vulva                                             |
| 25 | K424011 | Abscess of labia                                             |
| 26 | K424100 | Carbuncle of vulva                                           |
| 27 | K424111 | Boil of vulva                                                |
| 28 | K424200 | Furuncle of vulva                                            |
| 29 | K424z00 | Other abscess of vulva NOS                                   |
| 30 | K425.00 | Ulceration of vulva                                          |
| 31 | K425000 | Ulceration of vulva unspecified                              |
| 32 | K425100 | Ulceration of vulva in diseases EC                           |
| 33 | K425200 | Ulceration of vulva in Behcet's disease                      |
| 34 | K425z00 | Ulceration of vulva NOS                                      |
| 35 | L394500 | Infection of obstetric surgical wound                        |
| 36 | L441.00 | Caesarean wound disruption                                   |
| 37 | L441000 | Caesarean wound disruption unspecified                       |
| 38 | L441100 | Caesarean wound disruption - delivered with p/n complication |
| 39 | L441200 | Caesarean wound disruption with postnatal complication       |
| 40 | L441z00 | Caesarean wound disruption NOS                               |
| 41 | L442.00 | Obstetric perineal wound disruption                          |
| 42 | L442.11 | Breakdown of perineum                                        |
| 43 | L442.12 | Episiotomy breakdown                                         |
| 44 | L442000 | Obstetric perineal wound disruption unspecified              |
| 45 | L442100 | Obstetric perineal wound disruption - deliv + p/n comp       |
| 46 | L442200 | Obstetric perineal wound disruption with p/n complication    |
| 47 | L442z00 | Obstetric perineal wound disruption NOS                      |
| 48 | L443.00 | Other complication of obstetric surgical wound               |
| 49 | L443.11 | Haematoma - perineal wound                                   |
| 50 | L443.12 | Infection - perineal wound                                   |
| 51 | L443000 | Other complication of obstetric surgical wound unspecified   |
| 52 |         |                                                              |
| 53 |         |                                                              |
| 54 |         |                                                              |
| 55 |         |                                                              |
| 56 |         |                                                              |
| 57 |         |                                                              |
| 58 |         |                                                              |
| 59 |         |                                                              |
| 60 |         |                                                              |

|    |         |                                                              |
|----|---------|--------------------------------------------------------------|
| 1  |         |                                                              |
| 2  | L443100 | Other complication obstetric surg wound -delivered +p/n comp |
| 3  | L443200 | Other complication obstetric surgical wound with p/n comp    |
| 4  | L443z00 | Other complication of obstetric surgical wound NOS           |
| 5  | L45..00 | Obstetric breast infections                                  |
| 6  | L450.00 | Obstetric nipple infection                                   |
| 7  | L450.11 | Abscess of nipple - obstetric                                |
| 8  | L450.12 | Nipple infection - obstetric                                 |
| 9  | L450000 | Obstetric nipple infection unspecified                       |
| 10 | L450100 | Obstetric nipple infection - delivered                       |
| 11 | L450200 | Obstetric nipple infection - delivered with p/n complication |
| 12 | L450300 | Obstetric nipple infection with antenatal complication       |
| 13 | L450400 | Obstetric nipple infection with postnatal complication       |
| 14 | L450z00 | Obstetric nipple infection NOS                               |
| 15 | L451.00 | Obstetric breast abscess                                     |
| 16 | L451.11 | Purulent mastitis - obstetric                                |
| 17 | L451000 | Obstetric breast abscess unspecified                         |
| 18 | L451100 | Obstetric breast abscess - delivered                         |
| 19 | L451200 | Obstetric breast abscess - deliv with postnatal complication |
| 20 | L451300 | Obstetric breast abscess with antenatal complication         |
| 21 | L451400 | Obstetric breast abscess with postnatal complication         |
| 22 | L451z00 | Obstetric breast abscess NOS                                 |
| 23 | Lyu6A00 | [X]Infection of caesarean section wound following delivery   |
| 24 | M....00 | Skin and subcutaneous tissue diseases                        |
| 25 | M0...00 | Skin and subcutaneous tissue infections                      |
| 26 | M00..00 | Carbuncle                                                    |
| 27 | M000.00 | Carbuncle of face                                            |
| 28 | M000000 | Carbuncle of ear                                             |
| 29 | M000100 | Carbuncle of face (excluding eye)                            |
| 30 | M000200 | Carbuncle of nasal septum                                    |
| 31 | M000300 | Carbuncle of temple region                                   |
| 32 | M000z00 | Carbuncle of face NOS                                        |
| 33 | M001.00 | Carbuncle of neck                                            |
| 34 | M002.00 | Carbuncle of trunk                                           |
| 35 | M002000 | Carbuncle of chest wall                                      |
| 36 | M002100 | Carbuncle of breast                                          |
| 37 | M002200 | Carbuncle of back                                            |
| 38 | M002300 | Carbuncle of abdominal wall                                  |
| 39 | M002400 | Carbuncle of umbilicus                                       |
| 40 | M002500 | Carbuncle of flank                                           |
| 41 | M002600 | Carbuncle of groin                                           |
| 42 | M002700 | Carbuncle of perineum                                        |
| 43 | M002z00 | Carbuncle of trunk NOS                                       |
| 44 | M003.00 | Carbuncle of upper arm and forearm                           |
| 45 | M003000 | Carbuncle of shoulder                                        |
| 46 | M003100 | Carbuncle of axilla                                          |
| 47 | M003200 | Carbuncle of upper arm                                       |
| 48 | M003300 | Carbuncle of elbow                                           |
| 49 | M003400 | Carbuncle of forearm                                         |
| 50 | M003z00 | Carbuncle of upper arm and forearm NOS                       |
| 51 | M004.00 | Carbuncle of hand                                            |
| 52 |         |                                                              |
| 53 |         |                                                              |
| 54 |         |                                                              |
| 55 |         |                                                              |
| 56 |         |                                                              |
| 57 |         |                                                              |
| 58 |         |                                                              |
| 59 |         |                                                              |
| 60 |         |                                                              |

|    |         |                                       |
|----|---------|---------------------------------------|
| 1  |         |                                       |
| 2  | M004000 | Carbuncle of wrist                    |
| 3  | M004100 | Carbuncle of thumb                    |
| 4  | M004200 | Carbuncle of finger                   |
| 5  | M004z00 | Carbuncle of hand NOS                 |
| 6  | M005.00 | Carbuncle of buttock                  |
| 7  | M005000 | Carbuncle of anus                     |
| 8  | M005100 | Carbuncle of gluteal region           |
| 9  | M005z00 | Carbuncle of buttock NOS              |
| 10 | M006.00 | Carbuncle of leg (excluding foot)     |
| 11 | M006000 | Carbuncle of hip                      |
| 12 | M006100 | Carbuncle of thigh                    |
| 13 | M006200 | Carbuncle of knee                     |
| 14 | M006300 | Carbuncle of lower leg                |
| 15 | M006400 | Carbuncle of ankle                    |
| 16 | M006z00 | Carbuncle of leg (excluding foot) NOS |
| 17 | M007.00 | Carbuncle of foot                     |
| 18 | M007000 | Carbuncle of foot unspecified         |
| 19 | M007100 | Carbuncle of heel                     |
| 20 | M007200 | Carbuncle of toe                      |
| 21 | M007z00 | Carbuncle of foot NOS                 |
| 22 | M00y.00 | Carbuncle of other specified site     |
| 23 | M00y000 | Carbuncle of head (excluding face)    |
| 24 | M00yz00 | Carbuncle of other specified site NOS |
| 25 | M00z.00 | Carbuncle NOS                         |
| 26 | M01..00 | Furuncle - boil                       |
| 27 | M010.00 | Boil of face                          |
| 28 | M010000 | Boil of ear                           |
| 29 | M010100 | Boil of face (excluding eye)          |
| 30 | M010200 | Boil of nasal septum                  |
| 31 | M010300 | Boil of temple region                 |
| 32 | M010400 | Boil of external nose                 |
| 33 | M010z00 | Boil of face NOS                      |
| 34 | M011.00 | Boil of neck                          |
| 35 | M012.00 | Boil of trunk                         |
| 36 | M012000 | Boil of chest wall                    |
| 37 | M012100 | Boil of breast                        |
| 38 | M012200 | Boil of back                          |
| 39 | M012300 | Boil of abdominal wall                |
| 40 | M012400 | Boil of umbilicus                     |
| 41 | M012500 | Boil of flank                         |
| 42 | M012600 | Boil of groin                         |
| 43 | M012700 | Boil of perineum                      |
| 44 | M012z00 | Boil of trunk NOS                     |
| 45 | M013.00 | Boil of upper arm and forearm         |
| 46 | M013000 | Boil of shoulder                      |
| 47 | M013100 | Boil of axilla                        |
| 48 | M013200 | Boil of upper arm                     |
| 49 | M013300 | Boil of elbow                         |
| 50 | M013400 | Boil of forearm                       |
| 51 | M013z00 | Boil of upper arm and forearm NOS     |

|    |         |                                              |
|----|---------|----------------------------------------------|
| 1  |         |                                              |
| 2  | M014.00 | Boil of hand                                 |
| 3  | M014000 | Boil of wrist                                |
| 4  | M014100 | Boil of thumb                                |
| 5  | M014200 | Boil of finger                               |
| 6  | M014z00 | Boil of hand NOS                             |
| 7  | M015.00 | Boil of buttock                              |
| 8  | M015000 | Boil of anus                                 |
| 9  | M015100 | Boil of gluteal region                       |
| 10 | M015z00 | Boil of buttock NOS                          |
| 11 | M016.00 | Boil of leg (excluding foot)                 |
| 12 | M016000 | Boil of hip                                  |
| 13 | M016100 | Boil of thigh                                |
| 14 | M016200 | Boil of knee                                 |
| 15 | M016300 | Boil of lower leg                            |
| 16 | M016400 | Boil of ankle                                |
| 17 | M016z00 | Boil of leg (excluding foot) NOS             |
| 18 | M017.00 | Boil of foot                                 |
| 19 | M017000 | Boil of foot unspecified                     |
| 20 | M017100 | Boil of heel                                 |
| 21 | M017200 | Boil of toe                                  |
| 22 | M017z00 | Boil of foot NOS                             |
| 23 | M01y.00 | Boil of other specified site                 |
| 24 | M01y000 | Boil of head (excluding face)                |
| 25 | M01yz00 | Boil of other specified site NOS             |
| 26 | M01z.00 | Boil NOS                                     |
| 27 | M01z.11 | Recurrent boils                              |
| 28 | M01z.12 | Boils of multiple sites                      |
| 29 | M01z000 | Multiple boils                               |
| 30 | M02.00  | Cellulitis and abscess of finger and toe     |
| 31 | M020.00 | Cellulitis and abscess of finger             |
| 32 | M020000 | Cellulitis and abscess of finger unspecified |
| 33 | M020100 | Finger pulp abscess                          |
| 34 | M020111 | Felon                                        |
| 35 | M020112 | Whitlow                                      |
| 36 | M020200 | Onychia of finger                            |
| 37 | M020300 | Paronychia of finger                         |
| 38 | M020311 | Perionychia of finger                        |
| 39 | M020400 | Finger web space infection                   |
| 40 | M020500 | Pulp space infection of finger/thumb         |
| 41 | M020z00 | Cellulitis and abscess of finger NOS         |
| 42 | M021.00 | Cellulitis and abscess of toe                |
| 43 | M021000 | Cellulitis and abscess of toe unspecified    |
| 44 | M021100 | Onychia of toe                               |
| 45 | M021200 | Paronychia of toe                            |
| 46 | M021300 | Pulp space infection of toe                  |
| 47 | M021z00 | Cellulitis and abscess of toe NOS            |
| 48 | M021z11 | Perionychia of toe                           |
| 49 | M02z.00 | Cellulitis and abscess of digit NOS          |
| 50 | M02z.11 | Nail infection NOS                           |
| 51 | M02z.12 | Paronychia                                   |
| 52 |         |                                              |
| 53 |         |                                              |
| 54 |         |                                              |
| 55 |         |                                              |
| 56 |         |                                              |
| 57 |         |                                              |
| 58 |         |                                              |
| 59 |         |                                              |
| 60 |         |                                              |



|    |         |                                                             |
|----|---------|-------------------------------------------------------------|
| 1  |         |                                                             |
| 2  | M02z.13 | Infected nailfold                                           |
| 3  | M02z.14 | Nailfold infected                                           |
| 4  | M03..00 | Other cellulitis and abscess                                |
| 5  | M03..11 | Abscess of skin area excluding digits of hand or foot       |
| 6  | M03..12 | Acute lymphangitis of skin excluding digits of hand or foot |
| 7  | M03..13 | Cellulitis of skin area excluding digits of hand or foot    |
| 8  | M030.00 | Cellulitis and abscess of face                              |
| 9  | M030000 | Cellulitis and abscess of cheek (external)                  |
| 10 | M030011 | Cellulitis and abscess of cheek                             |
| 11 | M030100 | Cellulitis and abscess of nose (external)                   |
| 12 | M030111 | Cellulitis and abscess of nose                              |
| 13 | M030200 | Cellulitis and abscess of chin                              |
| 14 | M030300 | Cellulitis and abscess of submandibular region              |
| 15 | M030400 | Cellulitis and abscess of forehead                          |
| 16 | M030500 | Cellulitis and abscess of temple region                     |
| 17 | M030600 | Cellulitis of face                                          |
| 18 | M030z00 | Cellulitis and abscess of face NOS                          |
| 19 | M031.00 | Cellulitis and abscess of neck                              |
| 20 | M031.11 | Cervical abscess                                            |
| 21 | M032.00 | Cellulitis and abscess of trunk                             |
| 22 | M032000 | Cellulitis and abscess of chest wall                        |
| 23 | M032100 | Cellulitis and abscess of breast                            |
| 24 | M032200 | Cellulitis and abscess of back                              |
| 25 | M032300 | Cellulitis and abscess of abdominal wall                    |
| 26 | M032400 | Cellulitis and abscess of umbilicus                         |
| 27 | M032500 | Cellulitis and abscess of flank                             |
| 28 | M032600 | Cellulitis and abscess of groin                             |
| 29 | M032700 | Cellulitis and abscess of perineum                          |
| 30 | M032800 | Cellulitis of trunk                                         |
| 31 | M032z00 | Cellulitis and abscess of trunk NOS                         |
| 32 | M033.00 | Cellulitis and abscess of arm                               |
| 33 | M033000 | Cellulitis and abscess of shoulder                          |
| 34 | M033100 | Cellulitis and abscess of axilla                            |
| 35 | M033200 | Cellulitis and abscess of upper arm                         |
| 36 | M033300 | Cellulitis and abscess of elbow                             |
| 37 | M033400 | Cellulitis and abscess of forearm                           |
| 38 | M033z00 | Cellulitis and abscess of arm NOS                           |
| 39 | M034.00 | Cellulitis and abscess of hand excluding digits             |
| 40 | M034.11 | Cellulitis and abscess of hand                              |
| 41 | M034000 | Cellulitis and abscess of hand unspecified                  |
| 42 | M034011 | Abscess of dorsum of hand                                   |
| 43 | M034012 | Abscess of palm of hand                                     |
| 44 | M034013 | Cellulitis of dorsum of hand                                |
| 45 | M034014 | Cellulitis of palm of hand                                  |
| 46 | M034100 | Cellulitis and abscess of wrist                             |
| 47 | M034z00 | Cellulitis and abscess of hand NOS                          |
| 48 | M035.00 | Cellulitis and abscess of buttock                           |
| 49 | M036.00 | Cellulitis and abscess of leg excluding foot                |
| 50 | M036.11 | Cellulitis and abscess of leg                               |
| 51 | M036000 | Cellulitis and abscess of hip                               |
| 52 |         |                                                             |
| 53 |         |                                                             |
| 54 |         |                                                             |
| 55 |         |                                                             |
| 56 |         |                                                             |
| 57 |         |                                                             |
| 58 |         |                                                             |
| 59 |         |                                                             |
| 60 |         |                                                             |

|    |         |                                                        |
|----|---------|--------------------------------------------------------|
| 1  |         |                                                        |
| 2  | M036100 | Cellulitis and abscess of thigh                        |
| 3  | M036200 | Cellulitis and abscess of knee                         |
| 4  | M036300 | Cellulitis and abscess of lower leg                    |
| 5  | M036400 | Cellulitis and abscess of ankle                        |
| 6  | M036z00 | Cellulitis and abscess of leg NOS                      |
| 7  | M037.00 | Cellulitis and abscess of foot excluding toe           |
| 8  | M037.11 | Cellulitis and abscess of foot                         |
| 9  | M037000 | Cellulitis and abscess of foot unspecified             |
| 10 | M037100 | Cellulitis and abscess of heel                         |
| 11 | M037200 | Cellulitis in diabetic foot                            |
| 12 | M037z00 | Cellulitis and abscess of foot NOS                     |
| 13 | M038.00 | Cellulitis of external ear                             |
| 14 | M03y.00 | Other specified cellulitis and abscess                 |
| 15 | M03y000 | Cellulitis and abscess of head unspecified             |
| 16 | M03y011 | Abscess of scalp                                       |
| 17 | M03z.00 | Cellulitis and abscess NOS                             |
| 18 | M03z000 | Cellulitis NOS                                         |
| 19 | M03z100 | Abscess NOS                                            |
| 20 | M03zz00 | Cellulitis and abscess NOS                             |
| 21 | M060.00 | Pilonidal cyst with abscess                            |
| 22 | M061.00 | Pilonidal cyst with no abscess                         |
| 23 | M061.11 | Dermal sinus                                           |
| 24 | M062.00 | Pilonidal sinus with abscess                           |
| 25 | M063.00 | Pilonidal sinus without abscess                        |
| 26 | M06z.00 | Pilonidal sinus/cyst NOS                               |
| 27 | M07..00 | Other local infections of skin and subcutaneous tissue |
| 28 | M070200 | Pyoderma gangrenosum                                   |
| 29 | M070300 | Pyoderma ulcerosum tropicalum                          |
| 30 | M07y.00 | Local infection of skin or subcutaneous tissue OS      |
| 31 | M07yz00 | Other spec local skin/subc infection NOS               |
| 32 | M07yz11 | Infection toe                                          |
| 33 | M07yz12 | Infection foot                                         |
| 34 | M07yz13 | Infection finger                                       |
| 35 | M07z.00 | Local infection skin/subcut tissue NOS                 |
| 36 | M07z.11 | Infected wound from insect bite                        |
| 37 | M07z.12 | Infected skin ulcer                                    |
| 38 | M07z.13 | Septic spots                                           |
| 39 | M07z.14 | Infected dermatitis                                    |
| 40 | M07z000 | Infection foot                                         |
| 41 | M07z100 | Infection toe                                          |
| 42 | M07z200 | Infection finger                                       |
| 43 | M09..00 | Cutaneous abscess                                      |
| 44 | M090.00 | [X]Abscess of face                                     |
| 45 | M091.00 | [X]Abscess of neck                                     |
| 46 | M092.00 | [X]Abscess of trunk                                    |
| 47 | M092000 | [X]Abscess of buttock                                  |
| 48 | M092100 | [X]Abdominal wall abscess                              |
| 49 | M092200 | [X]Perineal abscess                                    |
| 50 | M093.00 | [X]Abscess of buttock                                  |
| 51 | M094.00 | [X]Abscess of limb                                     |
| 52 |         |                                                        |
| 53 |         |                                                        |
| 54 |         |                                                        |
| 55 |         |                                                        |
| 56 |         |                                                        |
| 57 |         |                                                        |
| 58 |         |                                                        |
| 59 |         |                                                        |
| 60 |         |                                                        |

|    |         |                                                              |
|----|---------|--------------------------------------------------------------|
| 1  |         |                                                              |
| 2  | M094000 | [X]Abscess of axilla                                         |
| 3  | M095.00 | Skin abscess                                                 |
| 4  | M09y.00 | [X]Abscess of other site                                     |
| 5  | M0y..00 | Other specified infections of skin or subcutaneous tissue    |
| 6  | M0z..00 | Skin and subcut tissue infection NOS                         |
| 7  | M0z..11 | Infected sebaceous cyst                                      |
| 8  | M1...00 | Other skin and subcutaneous tissue inflammatory conditions   |
| 9  | M2...00 | Other skin and subcutaneous tissue disorders                 |
| 10 |         |                                                              |
| 11 | M27..00 | Chronic skin ulcer                                           |
| 12 | M270.00 | Decubitus (pressure) ulcer                                   |
| 13 |         |                                                              |
| 14 | M270.11 | Bed sore                                                     |
| 15 | M270.12 | Plaster ulcer                                                |
| 16 | M270.13 | Pressure sore                                                |
| 17 | M270.14 | Decubitus ulcer and pressure area                            |
| 18 | M270000 | Hospital acquired pressure ulcer                             |
| 19 |         |                                                              |
| 20 | M270100 | Nursing home acquired pressure ulcer                         |
| 21 | M270200 | Community hospital acquired pressure ulcer                   |
| 22 | M270300 | Hospice acquired pressure ulcer                              |
| 23 |         |                                                              |
| 24 | M270400 | Stage I decubitus ulcer and pressure area                    |
| 25 | M270500 | Stage II decubitus ulcer                                     |
| 26 | M270600 | Stage III decubitus ulcer                                    |
| 27 | M270700 | Stage IV decubitus ulcer                                     |
| 28 |         |                                                              |
| 29 | M270z00 | Decubitus ulcer and pressure area NOS                        |
| 30 | M271.00 | Non-pressure ulcer lower limb                                |
| 31 | M271.11 | Foot ulcer                                                   |
| 32 | M271.12 | Ischaemic leg ulcer                                          |
| 33 | M271.13 | Leg ulcer NOS                                                |
| 34 |         |                                                              |
| 35 | M271.14 | Neurogenic leg ulcer                                         |
| 36 | M271.15 | Trophic leg ulcer                                            |
| 37 | M271000 | Ischaemic ulcer diabetic foot                                |
| 38 | M271100 | Neuropathic diabetic ulcer - foot                            |
| 39 | M271200 | Mixed diabetic ulcer - foot                                  |
| 40 |         |                                                              |
| 41 | M271300 | Arterial leg ulcer                                           |
| 42 | M271400 | Mixed venous and arterial leg ulcer                          |
| 43 | M271500 | Venous ulcer of leg                                          |
| 44 | M271600 | Traumatic leg ulcer                                          |
| 45 | M271700 | Neuropathic foot ulcer                                       |
| 46 |         |                                                              |
| 47 | M272.00 | Ulcer of skin                                                |
| 48 | M273.00 | Non-healing leg ulcer                                        |
| 49 | M274.00 | Recurrent leg ulcer                                          |
| 50 | M27y.00 | Chronic ulcer of skin, other specified sites                 |
| 51 | M27z.00 | Chronic skin ulcer NOS                                       |
| 52 |         |                                                              |
| 53 | M2y4D00 | Macerated perianal skin                                      |
| 54 | M2yA.00 | Skin sinus                                                   |
| 55 | M2yB.00 | Fistula of skin                                              |
| 56 | M2yz.11 | Skin lesion                                                  |
| 57 |         |                                                              |
| 58 | M2z0.00 | Skin lesion                                                  |
| 59 | Myu0.00 | [X]Infections of the skin and subcutaneous tissue            |
| 60 | Myu0100 | [X]Other specified local infections/skin+subcutaneous tissue |
|    | R153300 | [D]Positive culture findings in wound                        |

|    |         |                                                              |
|----|---------|--------------------------------------------------------------|
| 1  |         |                                                              |
| 2  | S002.00 | Open fracture vault of skull without intracranial injury     |
| 3  | S002000 | Open #skull vlt no intracranial injury, unspec state consc   |
| 4  | S002100 | Open #skull vlt no intracranial injury, no loss of consc     |
| 5  | S002200 | Open #skull vlt no intracranial injury, <1hr loss of consc   |
| 6  | S002300 | Open #skull vlt no intracranial injury, 1-24hr loss of consc |
| 7  | S002400 | Open #skull vlt no intracranial injury, >24hr LOC+recovery   |
| 8  | S002500 | Open #skull vlt no intracranial inj, >24hr LOC not restored  |
| 9  | S002600 | Open #skull vlt no intracranial injury, LOC unspec duration  |
| 10 | S002z00 | Open #skull vlt no intracranial injury + concussion unspec   |
| 11 | S003.00 | Open fracture vault of skull with intracranial injury        |
| 12 | S003000 | Open #skull vlt + intracranial injury, unspec state of consc |
| 13 | S003100 | Open #skull vlt + intracranial injury, no loss of consc      |
| 14 | S003200 | Open #skull vlt + intracranial injury, <1hr loss of consc    |
| 15 | S003300 | Open #skull vlt + intracranial injury, 1-24hr loss of consc  |
| 16 | S003400 | Open #skull vlt + intracranial injury, >24hr LOC + recovery  |
| 17 | S003500 | Open #skull vlt + intracranial inj, >24hr LOC not restored   |
| 18 | S003600 | Open #skull vlt + intracranial injury, LOC unspec duration   |
| 19 | S003z00 | Open #skull vlt with intracranial injury + concussion unspec |
| 20 | S012.00 | Open fracture base skull without mention intracranial injury |
| 21 | S012000 | Open #skull bse no intracranial inj, unspec state of consc   |
| 22 | S012100 | Open #skull bse no intracranial injury, no loss of consc     |
| 23 | S012200 | Open #skull bse no intracranial injury, <1hr loss of consc   |
| 24 | S012300 | Open #skull bse no intracranial injury, 1-24hr loss of consc |
| 25 | S012400 | Open #skull bse no intracranial injury, >24hr LOC+recovery   |
| 26 | S012500 | Open #skull bse no intracranial inj, >24hr LOC not restored  |
| 27 | S012600 | Open #skull bse no intracranial injury, LOC unspec duration  |
| 28 | S012z00 | Open #skull bse no intracranial injury + concussion unspec   |
| 29 | S013.00 | Open fracture base of skull with intracranial injury         |
| 30 | S013000 | Open #skull bse + intracranial injury, unspec state of consc |
| 31 | S013100 | Open #skull bse + intracranial injury, no loss of consc      |
| 32 | S013200 | Open #skull bse + intracranial injury, <1hr loss of consc    |
| 33 | S013300 | Open #skull bse + intracranial injury, 1-24hr loss of consc  |
| 34 | S013400 | Open #skull bse + intracranial injury, >24hr LOC + recovery  |
| 35 | S013500 | Open #skull bse + intracranial inj, >24hr LOC not restored   |
| 36 | S013600 | Open #skull bse + intracranial injury, LOC unspec duration   |
| 37 | S013z00 | Open #skull bse + intracranial injury + concussion unspec    |
| 38 | S032.00 | Open #skull NOS without mention of intracranial injury       |
| 39 | S032000 | Open #skull NOS no intracranial inj, unspec state of consc   |
| 40 | S032100 | Open #skull NOS no intracranial inj, no loss of consc        |
| 41 | S032200 | Open #skull NOS no intracranial inj, <1hr loss of consc      |
| 42 | S032300 | Open #skull NOS no intracranial inj, 1-24hrs loss of consc   |
| 43 | S032400 | Open #skull NOS no intracranial inj, >24hrs LOC + recovery   |
| 44 | S032500 | Open #skull NOS no intracranial inj, >24hrs LOC not restored |
| 45 | S032600 | Open #skull NOS no intracranial inj, LOC unspec duration     |
| 46 | S032z00 | Open #skull NOS no intracranial inj + concussion unspec      |
| 47 | S033.00 | Open fracture of skull NOS with intracranial injury          |
| 48 | S033000 | Open #skull NOS + intracranial inj, unspec state of consc    |
| 49 | S033100 | Open #skull NOS + intracranial inj, no loss of consc         |
| 50 | S033200 | Open #skull NOS + intracranial inj, <1hr loss of consc       |
| 51 | S033300 | Open #skull NOS + intracranial inj, 1-24hrs loss of consc    |
| 52 |         |                                                              |
| 53 |         |                                                              |
| 54 |         |                                                              |
| 55 |         |                                                              |
| 56 |         |                                                              |
| 57 |         |                                                              |
| 58 |         |                                                              |
| 59 |         |                                                              |
| 60 |         |                                                              |

1  
2  
3  
4  
5  
6  
7  
8  
9  
10  
11  
12  
13  
14  
15  
16  
17  
18  
19  
20  
21  
22  
23  
24  
25  
26  
27  
28  
29  
30  
31  
32  
33  
34  
35  
36  
37  
38  
39  
40  
41  
42  
43  
44  
45  
46  
47  
48  
49  
50  
51  
52  
53  
54  
55  
56  
57  
58  
59  
60

|         |                                                              |
|---------|--------------------------------------------------------------|
| S033400 | Open #skull NOS + intracranial inj, >24hrs LOC + recovery    |
| S033500 | Open #skull NOS + intracranial inj, >24hrs LOC not restored  |
| S033600 | Open #skull NOS + intracranial inj, LOC unspec duration      |
| S033z00 | Open #skull NOS + intracranial inj + concussion unspec       |
| S042000 | Open #skull/face, mult, no intracranial inj, unspec consc    |
| S042100 | Open #skull/face, mult, no intracranial inj, no loss consc   |
| S042200 | Open #skull/face, mult, no intracranial inj, <1hr LOC        |
| S042300 | Open #skull/face, mult, no intracranial inj, 1-24hrs LOC     |
| S042400 | Open #skull/face, mult, no intracran inj, >24hr LOC+recovery |
| S042500 | Open #skull/face,mult,no intracran inj,>24hr LOC no restored |
| S042600 | Open #skull/face,mult,no intracran inj, LOC unspec duration  |
| S042z00 | Open #skull/face,mult,no intracran inj, concussion unspec    |
| S043.00 | Mult #skull/face + other bones, open + intracranial injury   |
| S043000 | Open #skull/face, mult + intracranial inj, unspec consc      |
| S043100 | Open #skull/face, mult + intracranial inj, no loss consc     |
| S043200 | Open #skull/face, mult + intracranial inj, <1hr LOC          |
| S043300 | Open #skull/face, mult + intracranial inj, 1-24hrs LOC       |
| S043400 | Open #skull/face, mult + intracran inj, >24hr LOC + recovery |
| S043500 | Open #skull/face,mult + intracran inj, >24hr LOC no restored |
| S043600 | Open #skull/face, mult + intracran inj, LOC unspec duration  |
| S043z00 | Open #skull/face, mult + intracran inj + concussion, unspec  |
| S611000 | Cortex cont + open intracranial wound + unspec state consc   |
| S611100 | Cortex cont + open intracranial wound + no loss of consc     |
| S611200 | Cortex cont + open intracranial wound + <1hr loss of consc   |
| S611300 | Cortex cont + open intracranial wound + 1-24hr loss of consc |
| S611400 | Cortex cont + open intracranial wnd + >24hr LOC + recovery   |
| S611500 | Cortex cont + open intracranial wnd + >24hr LOC not restored |
| S611600 | Cortex cont + open intracranial wnd + LOC unspec duration    |
| S611z00 | Cortex cont + open intracranial wound + concussion unspec    |
| S613.00 | Cortex laceration with open intracranial wound               |
| S613000 | Cortex lacn + open intracranial wound + unspec state consc   |
| S613100 | Cortex lacn + open intracranial wound + no loss of consc     |
| S613200 | Cortex lacn + open intracranial wound + <1hr loss of consc   |
| S613300 | Cortex lacn + open intracranial wound + 1-24hr loss of consc |
| S613400 | Cortex lacn + open intracranial wound + >24hr LOC + recovery |
| S613500 | Cortex lacn + open intracranial wnd + >24hr LOC not restored |
| S613600 | Cortex lacn + open intracranial wnd + LOC unspec duration    |
| S613z00 | Cortex lacn + open intracranial wound + concussion unspec    |
| S615000 | Hind brain cont + open intracranial wnd + unspec state consc |
| S615100 | Hind brain cont + open intracranial wound + no loss consc    |
| S615200 | Hind brain cont + open intracranial wound + <1hr loss consc  |
| S615300 | Hind brain cont + open intracranial wnd + 1-24hr loss consc  |
| S615400 | Hind brain cont + open intracranial wnd +>24hr LOC +recovery |
| S615500 | Hind brain cont + open intracran wnd +>24hr LOC not restored |
| S615600 | Hind brain cont + open intracranial wnd +LOC unspec duration |
| S615z00 | Hind brain cont + open intracranial wnd + concussion unspec  |
| S617.00 | Hind brain laceration with open intracranial wound           |
| S617000 | Hind brain lacn + open intracranial wnd + unspec state consc |
| S617100 | Hind brain lacn + open intracranial wnd + no loss consc      |
| S617200 | Hind brain lacn + open intracranial wnd + <1hr loss consc    |

|    |                                                                      |
|----|----------------------------------------------------------------------|
| 1  |                                                                      |
| 2  | S617300 Hind brain lacn + open intracranial wnd + 1-24hr loss consc  |
| 3  | S617400 Hind brain lacn + open intracranial wnd+>24hr LOC + recovery |
| 4  | S617500 Hind brain lacn open intracranial wnd+>24hr LOC not restored |
| 5  | S617600 Hind brain lacn + open intracran wnd + LOC unspec duration   |
| 6  | S617z00 Hind brain lacn + open intracranial wnd + concussion unspec  |
| 7  | S61y000 Brain cont + open intracranial wound + unspec state consc    |
| 8  | S61y100 Brain cont + open intracranial wound + no loss of consc      |
| 9  | S61y200 Brain cont + open intracranial wound + <1hr loss of consc    |
| 10 | S61y300 Brain cont + open intracranial wound + 1-24hr loss of consc  |
| 11 | S61y400 Brain cont + open intracranial wound + >24hr LOC + recovery  |
| 12 | S61y500 Brain contusion + open intracr wound+>24hr LOC not ful reco  |
| 13 | S61y600 Brain cont + open intracranial wound + LOC unspec duration   |
| 14 | S61yz00 Brain cont + open intracranial wound + concussion unspec     |
| 15 | S621000 Subarachnoid h'ge inj + open intracran wound + unspec consc  |
| 16 | S621100 Subarachnoid h'ge inj + open intracranial wound + no LOC     |
| 17 | S621200 Subarachnoid h'ge inj + open intracran wound+<1hr loss consc |
| 18 | S621300 Subarachnoid h'ge inj + open intracran wnd+1-24hr loss consc |
| 19 | S621400 Subarach h'ge inj + open intracran wnd +>24hr LOC + recovery |
| 20 | S621500 Subarach h'ge inj + open intracran wnd+>24hr LOC -restored   |
| 21 | S621600 Subarach h'ge inj + open intracran wnd+LOC unspec duration   |
| 22 | S621z00 Subarachnoid h'ge inj + open intracran wnd+concussion unspec |
| 23 | S623000 Subdural h'ge inj + open intracranial wound + unspec consc   |
| 24 | S623100 Subdural h'ge inj + open intracranial wound+no loss consc    |
| 25 | S623200 Subdural h'ge inj + open intracranial wound+<1hr loss consc  |
| 26 | S623300 Subdural h'ge inj + open intracranial wnd+1-24hr loss consc  |
| 27 | S623400 Subdural h'ge inj + open intracran wound+>24hr LOC +recovery |
| 28 | S623500 Subdural h'ge inj + open intracran wnd+>24hr LOC -restored   |
| 29 | S623600 Subdural h'ge inj + open intracran wnd+LOC unspec duration   |
| 30 | S623z00 Subdural h'ge inj + open intracranial wnd+concussion unspec  |
| 31 | S625000 Extradural h'ge inj + open intracranial wnd + unspec consc   |
| 32 | S625100 Extradural h'ge inj + open intracranial wound+no loss consc  |
| 33 | S625200 Extradural h'ge inj + open intracranial wnd+<1hr loss consc  |
| 34 | S625300 Extradural h'ge inj + open intracran wnd+1-24hr loss consc   |
| 35 | S625400 Extradural h'ge inj + open intracran wnd+>24hr LOC+recovery  |
| 36 | S625500 Extradural h'ge inj + open intracran wnd+>24hr LOC -restored |
| 37 | S625600 Extradural h'ge inj + open intracran wnd+LOC unspec duration |
| 38 | S625z00 Extradural h'ge inj + open intracran wnd+concussion unspec   |
| 39 | S62A100 Traumatic extradural haematoma with open intracranial wound  |
| 40 | S631.00 Other cerebral h'ge after injury + open intracranial wound   |
| 41 | S631000 Oth cerebral h'ge inj + open intracran wnd + unspec consc    |
| 42 | S631100 Oth cerebral h'ge inj + open intracranial wnd+no loss consc  |
| 43 | S631200 Oth cerebral h'ge inj + open intracran wnd+<1hr loss consc   |
| 44 | S631300 Oth cerebral h'ge inj + open intracran wnd+1-24hr loss consc |
| 45 | S631400 Oth cereb h'ge inj + open intracran wnd+>24hr LOC + recovery |
| 46 | S631500 Oth cereb h'ge inj + open intracran wnd+>24hr LOC -restored  |
| 47 | S631600 Oth cereb h'ge inj + open intracran wnd+LOC unspec duration  |
| 48 | S631z00 Oth cereb h'ge inj + open intracran wnd+concussion unspec    |
| 49 | S641.00 Intracranial injury NOS + open intracranial wound            |
| 50 | S641000 Intracranial inj NOS + open intracranial wnd + unspec consc  |
| 51 | S641100 Intracranial inj NOS + open intracranial wound+no loss consc |
| 52 |                                                                      |
| 53 |                                                                      |
| 54 |                                                                      |
| 55 |                                                                      |
| 56 |                                                                      |
| 57 |                                                                      |
| 58 |                                                                      |
| 59 |                                                                      |
| 60 |                                                                      |



|    |         |                                                              |
|----|---------|--------------------------------------------------------------|
| 1  |         |                                                              |
| 2  | S641200 | Intracranial inj NOS + open intracranial wnd+<1hr loss consc |
| 3  | S641300 | Intracranial inj NOS + open intracranial wnd + 1-24hr LOC    |
| 4  | S641400 | Intracranial inj NOS + open intracran wnd+>24hr LOC+recovery |
| 5  | S641500 | Intracran inj NOS + open intracran wnd+>24hr LOC -restored   |
| 6  | S641600 | Intracran inj NOS + open intracran wnd+LOC unspec duration   |
| 7  | S641z00 | Intracranial inj NOS + open intracran wnd+concussion unspec  |
| 8  | S642100 | Traumatic cerebral oedema with open intracranial wound       |
| 9  | S645100 | Intracranial injury with prolonged coma with open wound      |
| 10 |         |                                                              |
| 11 | S701.00 | Open traumatic pneumothorax                                  |
| 12 | S703.00 | Open traumatic haemothorax                                   |
| 13 | S705.00 | Open traumatic haemopneumothorax                             |
| 14 | S711.00 | Heart injury, open                                           |
| 15 | S711000 | Heart injury with open wound into thorax, unspecified        |
| 16 | S711100 | Heart contusion, with open wound into thorax                 |
| 17 | S711200 | Heart laceration open, without penetration of heart chambers |
| 18 | S711300 | Heart laceration open, with penetration of heart chambers    |
| 19 | S711z00 | Heart injury with open wound into thorax NOS                 |
| 20 | S713000 | Lung injury with open wound into thorax, unspecified         |
| 21 | S713100 | Lung contusion with open wound into thorax                   |
| 22 | S713200 | Lung laceration with open wound into thorax                  |
| 23 | S713z00 | Lung injury with open wound into thorax, NOS                 |
| 24 | S73yz00 | Gastrointestinal tract injury with open wound to cavity NOS  |
| 25 | S8...00 | Open wound of head, neck and trunk                           |
| 26 | S8...12 | Open wound of head                                           |
| 27 | S8...13 | Open wound of trunk                                          |
| 28 | S80..00 | Open wound of ocular adnexa                                  |
| 29 | S80..11 | Open wound of eyelid                                         |
| 30 | S80..12 | Periocular open wound                                        |
| 31 | S800.00 | Eyelid skin and periocular area laceration                   |
| 32 | S803.00 | Penetrating wound of orbit without mention of foreign body   |
| 33 | S804.00 | Penetrating wound of orbit with foreign body                 |
| 34 | S80y.00 | Other open ocular adnexa wound                               |
| 35 | S80z.00 | Open wound of ocular adnexa NOS                              |
| 36 | S81..00 | Open wound of eyeball                                        |
| 37 | S81..12 | Open wound of eye                                            |
| 38 | S810.00 | Ocular laceration without intraocular prolapse               |
| 39 | S81z.00 | Open wound of eyeball NOS                                    |
| 40 | S82..00 | Open wound of ear                                            |
| 41 | S820.00 | Open wound of external ear                                   |
| 42 | S820000 | Open wound of external ear, unspecified                      |
| 43 | S820100 | Open wound of ear auricle                                    |
| 44 | S820w00 | Other open wound of external ear                             |
| 45 | S820z00 | Open wound of external ear not otherwise specified           |
| 46 | S821.00 | Open wound of external ear with complication                 |
| 47 | S821000 | Open wound of external ear with complication, unspecified    |
| 48 | S821100 | Open wound of ear auricle with complication                  |
| 49 | S821z00 | Open wound of external ear with complication, NOS            |
| 50 | S82v.00 | Other open wound of ear                                      |
| 51 | S82v011 | Open wound of drumhead without complication                  |
| 52 | S82v012 | Open wound of tympanic membrane without complication         |



|    |         |                                                          |
|----|---------|----------------------------------------------------------|
| 1  | S82v100 | Open wound of ear ossicle                                |
| 2  | S82v300 | Open wound of cochlea                                    |
| 3  | S82vz00 | Other open wound of ear NOS                              |
| 4  | S82w.00 | Other open wound of ear with complication                |
| 5  | S82w000 | Open wound of ear drum with complication                 |
| 6  | S82w100 | Open wound of ear ossicle with complication              |
| 7  | S82w300 | Open wound of cochlea with complication                  |
| 8  | S82wz00 | Other open wound of ear with complication NOS            |
| 9  | S82x.00 | Open wound of ear, uncomplicated not otherwise specified |
| 10 | S82y.00 | Open wound of ear with complication, NOS                 |
| 11 | S82z.00 | Open wound of ear NOS                                    |
| 12 | S83..00 | Other open wound of head                                 |
| 13 | S830.00 | Open wound of scalp                                      |
| 14 | S830100 | Avulsion of scalp                                        |
| 15 | S831.00 | Open wound of scalp with complication                    |
| 16 | S832.00 | Open wound of nose                                       |
| 17 | S832000 | Open wound of nose, unspecified                          |
| 18 | S832100 | Open wound of nasal septum                               |
| 19 | S832200 | Open wound of nasal cavity                               |
| 20 | S832300 | Open wound of nasal sinus                                |
| 21 | S832x00 | Multiple wounds of nose                                  |
| 22 | S832z00 | Open wound of nose NOS                                   |
| 23 | S833.00 | Open wound of nose with complication                     |
| 24 | S833000 | Open wound of nose with complication, unspecified        |
| 25 | S833100 | Open wound of nasal septum with complication             |
| 26 | S833200 | Open wound of nasal cavity with complication             |
| 27 | S833300 | Open wound of nasal sinus with complication              |
| 28 | S833x00 | Multiple open wounds of nose with complication           |
| 29 | S833z00 | Open wound of nose with complication, NOS                |
| 30 | S834.00 | Open wound of face                                       |
| 31 | S834000 | Open wound of face, unspecified                          |
| 32 | S834100 | Open wound of cheek                                      |
| 33 | S834200 | Open wound of forehead                                   |
| 34 | S834300 | Open wound of eyebrow                                    |
| 35 | S834400 | Open wound of lip                                        |
| 36 | S834500 | Open wound of jaw                                        |
| 37 | S834600 | Open wound of chin                                       |
| 38 | S834x00 | Multiple open wounds of face                             |
| 39 | S834z00 | Open wound of face, NOS                                  |
| 40 | S835.00 | Open wound of face with complication                     |
| 41 | S835000 | Open wound of face with complication, unspecified        |
| 42 | S835100 | Open wound of cheek with complication                    |
| 43 | S835200 | Open wound of forehead with complication                 |
| 44 | S835300 | Open wound of eyebrow with complication                  |
| 45 | S835400 | Open wound of lip with complication                      |
| 46 | S835500 | Open wound of jaw with complication                      |
| 47 | S835x00 | Multiple open wounds of face with complication           |
| 48 | S835z00 | Open wound of face with complication, NOS                |
| 49 | S836.00 | Open wound in mouth                                      |
| 50 | S836000 | Open wound in mouth, unspecified                         |
| 51 |         |                                                          |
| 52 |         |                                                          |
| 53 |         |                                                          |
| 54 |         |                                                          |
| 55 |         |                                                          |
| 56 |         |                                                          |
| 57 |         |                                                          |
| 58 |         |                                                          |
| 59 |         |                                                          |
| 60 |         |                                                          |

|    |         |                                                            |
|----|---------|------------------------------------------------------------|
| 1  |         |                                                            |
| 2  | S836100 | Open wound of buccal mucosa                                |
| 3  | S836200 | Open wound of gum                                          |
| 4  | S836400 | Open wound of tongue                                       |
| 5  | S836500 | Open wound of mouth floor                                  |
| 6  | S836600 | Open wound of palate                                       |
| 7  | S837100 | Open wound of buccal mucosa with complication              |
| 8  | S837200 | Open wound of gum with complication                        |
| 9  | S837400 | Open wound of tongue with complication                     |
| 10 | S837500 | Open wound of mouth floor with complication                |
| 11 | S837600 | Open wound of palate with complication                     |
| 12 | S83x.00 | Other open wound of head                                   |
| 13 | S83y.00 | Other open wound of head with complication                 |
| 14 | S83z.00 | Open wound of head NOS                                     |
| 15 | S84..00 | Open wound of neck                                         |
| 16 | S840.00 | Open wound of larynx and trachea                           |
| 17 | S840.11 | Open wound of larynx without complication                  |
| 18 | S840.12 | Open wound of trachea without complication                 |
| 19 | S840000 | Open wound of larynx and trachea, unspecified              |
| 20 | S840100 | Open wound of larynx                                       |
| 21 | S840200 | Open wound of trachea                                      |
| 22 | S840z00 | Open wound of larynx and trachea not otherwise specified   |
| 23 | S841.00 | Open wound of larynx and trachea with complication         |
| 24 | S841.11 | Open wound of larynx with complication                     |
| 25 | S841.12 | Open wound of trachea with complication                    |
| 26 | S841000 | Open wound of larynx and trachea with complication, unspec |
| 27 | S841100 | Open wound of larynx with complication                     |
| 28 | S841200 | Open wound of trachea with complication                    |
| 29 | S841z00 | Open wound of larynx and trachea with complication, NOS    |
| 30 | S842.00 | Open wound of thyroid                                      |
| 31 | S843.00 | Open wound of thyroid with complication                    |
| 32 | S844.00 | Open wound of pharynx                                      |
| 33 | S845.00 | Open wound of pharynx with complication                    |
| 34 | S84x.00 | Other open wound of neck                                   |
| 35 | S84x000 | Open wound of neck nape                                    |
| 36 | S84x100 | Open wound of supraclavicular region                       |
| 37 | S84xz00 | Open wound of neck, NOS                                    |
| 38 | S84xz11 | Open wound of throat NOS                                   |
| 39 | S84y.00 | Other open wound of neck with complication                 |
| 40 | S84y000 | Open wound of neck nape with complication                  |
| 41 | S84y100 | Open wound of supraclavicular region with complication     |
| 42 | S84yz00 | Open wound of neck with complication, NOS                  |
| 43 | S84z.00 | Open wound of neck NOS                                     |
| 44 | S85..00 | Open wound of chest wall                                   |
| 45 | S850.00 | Open wound of chest wall, uncomplicated                    |
| 46 | S850000 | Degloving injury chest wall                                |
| 47 | S851.00 | Open wound of chest wall with complication                 |
| 48 | S852.00 | Open wound of front wall of thorax                         |
| 49 | S853.00 | Multiple open wounds of thoracic wall                      |
| 50 | S855.00 | Open wound of back wall of thorax                          |
| 51 | S85X.00 | Open wound of thorax, part unspecified                     |
| 52 |         |                                                            |
| 53 |         |                                                            |
| 54 |         |                                                            |
| 55 |         |                                                            |
| 56 |         |                                                            |
| 57 |         |                                                            |
| 58 |         |                                                            |
| 59 |         |                                                            |
| 60 |         |                                                            |

|    |         |                                                              |
|----|---------|--------------------------------------------------------------|
| 1  | S85z.00 | Open wound of chest wall NOS                                 |
| 2  | S86..00 | Open wound of back                                           |
| 3  | S86..11 | Open wound of loin                                           |
| 4  | S86..12 | Open wound of lumbar region                                  |
| 5  | S860.00 | Open wound of back, uncomplicated                            |
| 6  | S860000 | Degloving injury back                                        |
| 7  | S861.00 | Open wound of back with complication                         |
| 8  | S86z.00 | Open wound of back NOS                                       |
| 9  | S87..00 | Open wound of buttock                                        |
| 10 | S87..11 | Open wound of sacroiliac region                              |
| 11 | S870.00 | Open wound of buttock, uncomplicated                         |
| 12 | S870000 | Degloving injury buttock                                     |
| 13 | S871.00 | Open wound of buttock with complication                      |
| 14 | S87z.00 | Open wound of buttock NOS                                    |
| 15 | S88..00 | Open wound of external genital organs                        |
| 16 | S880.00 | Open wound of penis                                          |
| 17 | S880000 | Degloving injury penis                                       |
| 18 | S881.00 | Open wound of penis with complication                        |
| 19 | S882.00 | Open wound of scrotum and testes                             |
| 20 | S882000 | Open wound of scrotum                                        |
| 21 | S882100 | Open wound of testes                                         |
| 22 | S882200 | Degloving injury scrotum                                     |
| 23 | S882z00 | Open wound of scrotum and testes not otherwise specified     |
| 24 | S883.00 | Open wound of scrotum and testes with complication           |
| 25 | S883000 | Open wound of scrotum with complication                      |
| 26 | S883100 | Open wound of testes with complication                       |
| 27 | S883z00 | Open wound of scrotum and testes with complication, NOS      |
| 28 | S884.00 | Open wound of vulva                                          |
| 29 | S884000 | Open wound of vulva, unspecified                             |
| 30 | S884100 | Open wound of labium majus                                   |
| 31 | S884200 | Open wound of labium minus                                   |
| 32 | S884z00 | Open wound of vulva, NOS                                     |
| 33 | S885.00 | Open wound of vulva with complication                        |
| 34 | S885000 | Open wound of vulva with complication, unspecified           |
| 35 | S885100 | Open wound of labium majus with complication                 |
| 36 | S885200 | Open wound of labium minus with complication                 |
| 37 | S885z00 | Open wound of vulva with complication, NOS                   |
| 38 | S886.00 | Open wound of vagina                                         |
| 39 | S887.00 | Open wound of vagina with complication                       |
| 40 | S88x.00 | Other open wound of external genital organ                   |
| 41 | S88y.00 | Other open wound of external genital organ with complication |
| 42 | S88z.00 | Open wound of external genital organ NOS                     |
| 43 | S89..00 | Other open wounds of other sites, excluding limbs            |
| 44 | S890.00 | Open wound of breast                                         |
| 45 | S891.00 | Open wound of breast with complication                       |
| 46 | S892.00 | Open wound of anterior abdominal wall                        |
| 47 | S892000 | Open wound of epigastric region                              |
| 48 | S892100 | Open wound umbilical region                                  |
| 49 | S892200 | Open wound of hypogastric region                             |
| 50 | S892300 | Open wound of pubic region without complication              |

|    |         |                                                              |
|----|---------|--------------------------------------------------------------|
| 1  |         |                                                              |
| 2  | S892z00 | Open wound anterior abdominal wall without complication NOS  |
| 3  | S893.00 | Open wound of anterior abdominal wall with complication      |
| 4  | S893000 | Open wound of epigastrium with complication                  |
| 5  | S893100 | Open wound of umbilical region with complication             |
| 6  | S893200 | Open wound of hypogastrium with complication                 |
| 7  | S893300 | Open wound of pubic region with complication                 |
| 8  | S893z00 | Open wound of anterior abdominal wall with complication NOS  |
| 9  | S894.00 | Open wound of lateral abdominal wall                         |
| 10 | S894000 | Open wound of hypochondrium                                  |
| 11 | S894100 | Open wound of lumbar region                                  |
| 12 | S894111 | Open wound of flank without complication                     |
| 13 | S894200 | Open wound of iliac region                                   |
| 14 | S894300 | Open wound of inguinal region                                |
| 15 | S894311 | Open wound of groin without complication                     |
| 16 | S894400 | Open wound of flank without complication                     |
| 17 | S894500 | Open wound of loin                                           |
| 18 | S894z00 | Open wound of lateral abdominal wall NOS                     |
| 19 | S895.00 | Open wound of lateral abdominal wall with complication       |
| 20 | S895000 | Open wound of hypochondrium with complication                |
| 21 | S895100 | Open wound of lumbar region with complication                |
| 22 | S895111 | Open wound of flank with complication                        |
| 23 | S895200 | Open wound of iliac region with complication                 |
| 24 | S895300 | Open wound of inguinal region with complication              |
| 25 | S895311 | Open wound of groin with complication                        |
| 26 | S895400 | Open wound of flank with complication                        |
| 27 | S895z00 | Open wound of lateral abdominal wall with complication, NOS  |
| 28 | S89v.00 | Other and unspecified open wound of trunk                    |
| 29 | S89v000 | Open wound of pelvic region                                  |
| 30 | S89v100 | Open wound of perineum                                       |
| 31 | S89vz00 | Other and unspecified open wound of trunk, NOS               |
| 32 | S89w.00 | Other and unspecified open wound of trunk with complication  |
| 33 | S89w000 | Open wound of pelvic region with complication                |
| 34 | S89w100 | Open wound of perineum with complication                     |
| 35 | S89wz00 | Other and unspecified open wound trunk with complication NOS |
| 36 | S89x.00 | Multiple open wounds, of unspecified site                    |
| 37 | S89y.00 | Multiple open wounds with complication, of unspecified site  |
| 38 | S89z.00 | Other open wounds NOS                                        |
| 39 | S8A..00 | Open wounds involving head with neck                         |
| 40 | S8z..00 | Open wound of head, neck and trunk NOS                       |
| 41 | S8z..11 | Laceration NOS                                               |
| 42 | S8z..12 | Traumatic ulcer NOS                                          |
| 43 | S8z..13 | Laceration                                                   |
| 44 | S9...00 | Open wound of upper limb                                     |
| 45 | S9...11 | Laceration of arm                                            |
| 46 | S9...12 | Open wound of arm                                            |
| 47 | S90..00 | Open wound of shoulder region and upper limb                 |
| 48 | S900.00 | Open wound of shoulder/upper limb without complication       |
| 49 | S900000 | Open wound of shoulder region                                |
| 50 | S900100 | Open wound of scapular region                                |
| 51 | S900200 | Open wound of axillary region                                |

|    |         |                                                             |
|----|---------|-------------------------------------------------------------|
| 1  |         |                                                             |
| 2  | S900300 | Open wound of upper arm                                     |
| 3  | S900400 | Multiple open wounds of shoulder and upper arm              |
| 4  | S900x00 | Multiple open wounds of upper arm                           |
| 5  | S900z00 | Open wound of shoulder and upper limb NOS                   |
| 6  | S901.00 | Open wound of shoulder and upper limb with complication     |
| 7  | S901000 | Open wound of shoulder region with complication             |
| 8  | S901100 | Open wound of scapular region with complication             |
| 9  | S901200 | Open wound of axillary region with complication             |
| 10 | S901300 | Open wound of upper arm with complication                   |
| 11 | S901x00 | Multiple open wounds of upper arm with complication         |
| 12 | S901z00 | Open wound of shoulder and upper arm with complication, NOS |
| 13 | S902.00 | Open wound of shoulder/upper limb with tendon involvement   |
| 14 | S902.11 | Open wound of arm with tendon injury                        |
| 15 | S902000 | Open wound of shoulder region with tendon involvement       |
| 16 | S902100 | Open wound of scapular region with tendon involvement       |
| 17 | S902200 | Open wound of axillary region with tendon involvement       |
| 18 | S902300 | Open wound of upper arm with tendon involvement             |
| 19 | S902x00 | Multiple open wounds of upper arm with tendon involvement   |
| 20 | S902z00 | Open wound shoulder/upper arm with tendon involvement, NOS  |
| 21 | S903.00 | Degloving injury, shoulder or upper arm                     |
| 22 | S903000 | Degloving injury, shoulder area                             |
| 23 | S903100 | Degloving injury, scapular area                             |
| 24 | S903200 | Degloving injury, axilla                                    |
| 25 | S903300 | Degloving injury, upper arm                                 |
| 26 | S90z.00 | Open wound of shoulder region and upper arm NOS             |
| 27 | S91..00 | Open wound of elbow, forearm and wrist                      |
| 28 | S910.00 | Open wound of lower arm without mention of complication     |
| 29 | S910000 | Open wound of forearm                                       |
| 30 | S910100 | Open wound of elbow                                         |
| 31 | S910200 | Open wound of wrist, unspecified                            |
| 32 | S910300 | Open wound of wrist, volar                                  |
| 33 | S910400 | Open wound of wrist, dorsal                                 |
| 34 | S910z00 | Open wound of lower arm, NOS                                |
| 35 | S911.00 | Open wound of lower arm with complication                   |
| 36 | S911000 | Open wound of forearm with complication                     |
| 37 | S911100 | Open wound of elbow with complication                       |
| 38 | S911200 | Open wound of wrist with complication                       |
| 39 | S911z00 | Open wound of lower arm with complication, NOS              |
| 40 | S912.00 | Open wound of lower arm with tendon involvement             |
| 41 | S912.11 | Open wound of lower arm with tendon injury                  |
| 42 | S912000 | Open wound of forearm with tendon involvement               |
| 43 | S912100 | Open wound of elbow with tendon involvement                 |
| 44 | S912200 | Open wound of wrist with tendon involvement                 |
| 45 | S912300 | Complete division extensor tendon wrist                     |
| 46 | S912400 | Complete division flexor tendon wrist                       |
| 47 | S912z00 | Open wound of lower arm with tendon involvement, NOS        |
| 48 | S913.00 | Degloving injury lower arm                                  |
| 49 | S913000 | Degloving injury, forearm                                   |
| 50 | S913100 | Degloving injury, elbow area                                |
| 51 | S913200 | Degloving injury wrist, volar                               |
| 52 |         |                                                             |
| 53 |         |                                                             |
| 54 |         |                                                             |
| 55 |         |                                                             |
| 56 |         |                                                             |
| 57 |         |                                                             |
| 58 |         |                                                             |
| 59 |         |                                                             |
| 60 |         |                                                             |

|    |         |                                                             |
|----|---------|-------------------------------------------------------------|
| 1  |         |                                                             |
| 2  | S913300 | Degloving injury wrist, dorsum                              |
| 3  | S91z.00 | Open wound of elbow, forearm and wrist NOS                  |
| 4  | S92..00 | Open wound of hand, excluding finger(s)                     |
| 5  | S920.00 | Open wound of hand without mention of complication          |
| 6  | S920000 | Open wound of hand, palm                                    |
| 7  | S920100 | Open wound of hand, dorsum                                  |
| 8  | S920200 | Multiple open wounds of wrist and hand                      |
| 9  | S921.00 | Open wound of hand with complication                        |
| 10 | S922.00 | Open wound of hand with tendon involvement                  |
| 11 | S923.00 | Degloving injury hand                                       |
| 12 | S923000 | Degloving injury hand, palmar                               |
| 13 | S923100 | Degloving injury hand, dorsum                               |
| 14 | S924.00 | Severe multi tissue damage hand                             |
| 15 | S925.00 | Massive multi tissue damage hand                            |
| 16 | S92z.00 | Open wound of hand, excluding fingers, NOS                  |
| 17 | S93..00 | Open wound of finger(s) or thumb                            |
| 18 | S93..11 | Open wound of fingernail                                    |
| 19 | S93..12 | Open wound of nail                                          |
| 20 | S93..13 | Open wound of thumb                                         |
| 21 | S93..14 | Open wound of thumbnail                                     |
| 22 | S930.00 | Open wound of finger or thumb without mention of complicatn |
| 23 | S930000 | Open wound, finger                                          |
| 24 | S930100 | Open wound, finger, multiple                                |
| 25 | S930200 | Open wound, thumb                                           |
| 26 | S931.00 | Open wound of finger or thumb with complication             |
| 27 | S932.00 | Open wound of finger or thumb with tendon involvement       |
| 28 | S932.11 | Open wound of finger with tendon injury                     |
| 29 | S932000 | Complete division, flexor digitorum superficialis tendon    |
| 30 | S932100 | Complete division, flexor digitorum profundus tendon        |
| 31 | S932200 | Complete division, both flexor tendons                      |
| 32 | S932300 | Complete division, extensor digitorum tendon                |
| 33 | S932400 | Mallet finger with open tendon injury                       |
| 34 | S932500 | Complete division, flexor pollicis longus tendon            |
| 35 | S932600 | Complete division, extensor pollicis longus tendon          |
| 36 | S932700 | Mallet thumb with open tendon injury                        |
| 37 | S933.00 | Degloving injury, finger                                    |
| 38 | S933000 | Degloving injury, finger unspecified                        |
| 39 | S933100 | Degloving injury, finger, multiple                          |
| 40 | S933200 | Ring avulsion injury, class 1                               |
| 41 | S933300 | Ring avulsion injury, class 2                               |
| 42 | S933400 | Ring avulsion injury, class 3                               |
| 43 | S933500 | Ring avulsion injury, class 4                               |
| 44 | S934.00 | Degloving injury, thumb                                     |
| 45 | S935.00 | Open wound fingernail                                       |
| 46 | S936.00 | Open wound thumbnail                                        |
| 47 | S937.00 | Open wound of finger with damage to nail                    |
| 48 | S938.00 | Open wound of thumb with damage to nail                     |
| 49 | S93z.00 | Open wound of finger(s) NOS                                 |
| 50 | S94..00 | Multiple and unspecified open wound of upper limb           |
| 51 | S940.00 | Multiple/unspec open wound upper limb without complication  |
| 52 |         |                                                             |
| 53 |         |                                                             |
| 54 |         |                                                             |
| 55 |         |                                                             |
| 56 |         |                                                             |
| 57 |         |                                                             |
| 58 |         |                                                             |
| 59 |         |                                                             |
| 60 |         |                                                             |



|    |         |                                                             |
|----|---------|-------------------------------------------------------------|
| 1  |         |                                                             |
| 2  | S941.00 | Multiple/unspec open wound of upper limb with complication  |
| 3  | S942.00 | Multiple/unspec open wound upper limb with tendon involved  |
| 4  | S942.11 | Multiple/unspec open wound of upper limb with tendon injury |
| 5  | S94z.00 | Multiple and unspecified open wound of upper limb NOS       |
| 6  | S96X.00 | Comb traum amp of (part of) fing(s) + oth part wrist/hand   |
| 7  | S9z..00 | Open wound of upper limb NOS                                |
| 8  | SA...00 | Open wound of lower limb                                    |
| 9  | SA...11 | Open wound of leg                                           |
| 10 | SA...12 | Laceration - leg                                            |
| 11 | SA0..00 | Open wound of hip and thigh                                 |
| 12 | SA00.00 | Open wound of hip and thigh without mention of complication |
| 13 | SA00000 | Open wound of hip                                           |
| 14 | SA00100 | Open wound of thigh                                         |
| 15 | SA00z00 | Open wound hip and thigh, NOS                               |
| 16 | SA01.00 | Open wound of hip and thigh with complication               |
| 17 | SA01000 | Open wound of hip with complication                         |
| 18 | SA01100 | Open wound of thigh with complication                       |
| 19 | SA01z00 | Open wound of hip and thigh with complication, NOS          |
| 20 | SA02.00 | Open wound of hip and thigh with tendon involvement         |
| 21 | SA02.11 | Open wound of hip and thigh with tendon injury              |
| 22 | SA02000 | Open wound of hip with tendon involvement                   |
| 23 | SA02100 | Open wound of thigh with tendon involvement                 |
| 24 | SA02200 | Complete division, quadriceps tendon                        |
| 25 | SA02300 | Complete division, hamstring tendon                         |
| 26 | SA02z00 | Open wound of hip and thigh with tendon involvement, NOS    |
| 27 | SA03.00 | Degloving injury, hip or thigh                              |
| 28 | SA03000 | Degloving injury, hip                                       |
| 29 | SA03100 | Degloving injury, thigh                                     |
| 30 | SA04.00 | Severe multi tissue damage hip or thigh                     |
| 31 | SA05.00 | Massive multi tissue damage hip or thigh                    |
| 32 | SA0z.00 | Open wound of hip and thigh NOS                             |
| 33 | SA1..00 | Open wound of knee, leg and ankle                           |
| 34 | SA10.00 | Open wound of knee, leg and ankle without complication      |
| 35 | SA10000 | Open wound of knee                                          |
| 36 | SA10100 | Open wound of leg                                           |
| 37 | SA10200 | Open wound of ankle                                         |
| 38 | SA10z00 | Open wound of knee, leg and ankle NOS                       |
| 39 | SA11.00 | Open wound of knee, leg and ankle with complication         |
| 40 | SA11000 | Open wound of knee with complication                        |
| 41 | SA11100 | Open wound of lower leg with complication                   |
| 42 | SA11200 | Open wound of ankle with complication                       |
| 43 | SA11z00 | Open wound of knee/leg/ankle with complication, NOS         |
| 44 | SA12.00 | Open wound of knee, leg and ankle with tendon involvement   |
| 45 | SA12.11 | Open wound of leg with tendon injury                        |
| 46 | SA12000 | Open wound of knee with tendon involvement                  |
| 47 | SA12100 | Open wound of lower leg with tendon involvement             |
| 48 | SA12200 | Open wound of ankle with tendon involvement                 |
| 49 | SA12300 | Complete division, patellar tendon                          |
| 50 | SA12400 | Complete division, tendocalcaneus (Achilles tendon)         |
| 51 | SA12z00 | Open wound of knee/leg/ankle with tendon involvement, NOS   |
| 52 |         |                                                             |
| 53 |         |                                                             |
| 54 |         |                                                             |
| 55 |         |                                                             |
| 56 |         |                                                             |
| 57 |         |                                                             |
| 58 |         |                                                             |
| 59 |         |                                                             |
| 60 |         |                                                             |



|    |         |                                                            |
|----|---------|------------------------------------------------------------|
| 1  |         |                                                            |
| 2  | SA13.00 | Degloving injury, knee or leg or ankle                     |
| 3  | SA13000 | Degloving injury, knee                                     |
| 4  | SA13100 | Degloving injury, lower leg                                |
| 5  | SA13200 | Degloving injury, ankle                                    |
| 6  |         |                                                            |
| 7  | SA14.00 | Severe multi tissue damage lower leg                       |
| 8  | SA15.00 | Massive multi tissue damage lower leg                      |
| 9  | SA16.00 | Multiple injuries of ankle and foot                        |
| 10 | SA1z.00 | Open wound of knee, leg and ankle NOS                      |
| 11 | SA2..00 | Open wound of foot, excluding toe(s)                       |
| 12 | SA2..11 | Open wound of heel                                         |
| 13 |         |                                                            |
| 14 | SA20.00 | Open wound of foot without mention of complication         |
| 15 | SA20100 | Open wound foot, plantar                                   |
| 16 | SA20200 | Open wound foot, dorsum                                    |
| 17 | SA20300 | Open wound, heel                                           |
| 18 | SA21.00 | Open wound of foot with complication                       |
| 19 | SA22.00 | Open wound of foot with tendon involvement                 |
| 20 | SA22.11 | Open wound of foot with tendon injury                      |
| 21 | SA22000 | Complete division, flexor tendon, foot                     |
| 22 | SA22100 | Complete division, extensor tendon, foot                   |
| 23 |         |                                                            |
| 24 | SA23.00 | Degloving injury, foot                                     |
| 25 | SA23000 | Degloving injury foot, plantar                             |
| 26 | SA23100 | Degloving injury foot, dorsum                              |
| 27 | SA23200 | Degloving injury heel                                      |
| 28 |         |                                                            |
| 29 | SA24.00 | Severe multi tissue damage foot                            |
| 30 | SA25.00 | Massive multi tissue damage foot                           |
| 31 | SA2z.00 | Open wound of foot NOS                                     |
| 32 | SA3..00 | Open wound of toe(s)                                       |
| 33 | SA3..11 | Open wound of toenail                                      |
| 34 | SA30.00 | Open wound of toe(s) without mention of complication       |
| 35 | SA31.00 | Open wound of toe(s) with complication                     |
| 36 | SA32.00 | Open wound of toe(s) with tendon involvement               |
| 37 | SA32.11 | Open wound of toe(s) with tendon injury                    |
| 38 | SA33.00 | Degloving injury toe(s)                                    |
| 39 | SA33000 | Degloving injury toe                                       |
| 40 | SA33100 | Degloving injury, multiple toes                            |
| 41 | SA34.00 | Open wound of toe(s) with damage to nail                   |
| 42 | SA3z.00 | Open wound of toe(s) NOS                                   |
| 43 | SA4..00 | Multiple and unspecified open wound of lower limb          |
| 44 | SA40.00 | Multiple and unspec open wound leg, without complication   |
| 45 | SA41.00 | Multiple and unspec open wound of leg with complication    |
| 46 | SA42.00 | Multiple and unspec open wound leg with tendon involvement |
| 47 | SA4z.00 | Multiple and unspecified open wound of lower limb NOS      |
| 48 | SA9..00 | Multiple open wounds of hip and thigh                      |
| 49 | SAA..00 | Open wounds involving multiple regions of lower limb(s)    |
| 50 | SAz..00 | Open wound of lower limb NOS                               |
| 51 | SC10.00 | Late effect of open wound of head, neck and trunk          |
| 52 | SC11.00 | Late effect of open wound arm or leg without tendon injury |
| 53 | SC15.00 | Late effect of burn of eye, head and neck                  |
| 54 | SC15.11 | Late effect of burn of head or neck                        |
| 55 | SC16.00 | Late effect of burn of wrist and hand                      |
| 56 |         |                                                            |
| 57 |         |                                                            |
| 58 |         |                                                            |
| 59 |         |                                                            |
| 60 |         |                                                            |

|    |         |                                                              |
|----|---------|--------------------------------------------------------------|
| 1  |         |                                                              |
| 2  | SC17.00 | Late effect of burn of arm, leg and foot                     |
| 3  | SC17.11 | Late effect of burn of arm or leg                            |
| 4  | SC18.00 | Late effect of other burns                                   |
| 5  | SC19.00 | Late effect of burn NOS                                      |
| 6  | SC1A.00 | Late effect of burn of upper limb                            |
| 7  | SC38.00 | Sequelae of open wound of head                               |
| 8  | SC3A.00 | Sequelae of superficial injury + open wound of neck + trunk  |
| 9  | SC3C.00 | Sequelae of open wound of upper limb                         |
| 10 | SC3D000 | Sequelae of open wound of lower limb                         |
| 11 | SC44.00 | Sequelae of burns, corrosions and frostbite                  |
| 12 | SC44000 | Sequelae of burn, corrosion and frostbite of trunk           |
| 13 | SC44100 | Sequelae of burn, corrosion and frostbite of lower limb      |
| 14 | SC44200 | Seq/burn+corros classfbl only accord extent/body surf involv |
| 15 | SD01.00 | Abrasion or friction burn of head, infected                  |
| 16 | SD01.11 | Abrasion or friction burn of head, infected                  |
| 17 | SD01000 | Abrasion of face, infected                                   |
| 18 | SD01100 | Abrasion of neck, infected                                   |
| 19 | SD01200 | Abrasion of scalp, infected                                  |
| 20 | SD01z00 | Abrasion or friction burn of head, infected, NOS             |
| 21 | SD03.00 | Blister of head, infected                                    |
| 22 | SD03000 | Blister of face, infected                                    |
| 23 | SD03100 | Blister of neck, infected                                    |
| 24 | SD03200 | Blister of scalp, infected                                   |
| 25 | SD03z00 | Blister of head, infected, NOS                               |
| 26 | SD05.00 | Insect bite, nonvenomous, of head, infected                  |
| 27 | SD05.11 | Insect bite, nonvenomous, of head, infected                  |
| 28 | SD05000 | Insect bite, nonvenomous, of face, infected                  |
| 29 | SD05100 | Insect bite, nonvenomous, of neck, infected                  |
| 30 | SD05200 | Insect bite, nonvenomous, of scalp, infected                 |
| 31 | SD05z00 | Insect bite, nonvenomous, of head, infected, NOS             |
| 32 | SD11.00 | Abrasion or friction burn of trunk, infected                 |
| 33 | SD11000 | Abrasion of interscapular region, infected                   |
| 34 | SD11100 | Abrasion of chest wall, infected                             |
| 35 | SD11200 | Abrasion of breast, infected                                 |
| 36 | SD11300 | Abrasion of abdominal wall, infected                         |
| 37 | SD11400 | Abrasion of back, infected                                   |
| 38 | SD11500 | Abrasion of buttock, infected                                |
| 39 | SD11600 | Abrasion of anus, infected                                   |
| 40 | SD11700 | Abrasion of flank, infected                                  |
| 41 | SD11800 | Abrasion of groin, infected                                  |
| 42 | SD11900 | Abrasion of perineum, infected                               |
| 43 | SD11A00 | Abrasion of penis, infected                                  |
| 44 | SD11B00 | Abrasion of scrotum and testis, infected                     |
| 45 | SD11B11 | Abrasion or friction burn of scrotum, infected               |
| 46 | SD11B12 | Abrasion or friction burn of testis, infected                |
| 47 | SD11C00 | Abrasion of vulva, infected                                  |
| 48 | SD11z00 | Abrasion or friction burn of trunk, infected, NOS            |
| 49 | SD13.00 | Blister of trunk, infected                                   |
| 50 | SD13000 | Blister of interscapular region, infected                    |
| 51 | SD13100 | Blister of chest wall, infected                              |
| 52 |         |                                                              |
| 53 |         |                                                              |
| 54 |         |                                                              |
| 55 |         |                                                              |
| 56 |         |                                                              |
| 57 |         |                                                              |
| 58 |         |                                                              |
| 59 |         |                                                              |
| 60 |         |                                                              |

|    |         |                                                             |
|----|---------|-------------------------------------------------------------|
| 1  |         |                                                             |
| 2  | SD13200 | Blister of breast, infected                                 |
| 3  | SD13300 | Blister of abdominal wall, infected                         |
| 4  | SD13400 | Blister of back, infected                                   |
| 5  | SD13500 | Blister of buttock, infected                                |
| 6  | SD13600 | Blister of anus, infected                                   |
| 7  | SD13700 | Blister of flank, infected                                  |
| 8  | SD13800 | Blister of groin, infected                                  |
| 9  | SD13900 | Blister of perineum, infected                               |
| 10 | SD13A00 | Blister of penis, infected                                  |
| 11 | SD13B00 | Blister of scrotum and testis, infected                     |
| 12 | SD13B11 | Blister of scrotum, infected                                |
| 13 | SD13B12 | Blister of testis, infected                                 |
| 14 | SD13C00 | Blister of vulva, infected                                  |
| 15 | SD13D00 | Blister of vagina, infected                                 |
| 16 | SD13z00 | Blister of trunk, infected, NOS                             |
| 17 | SD15.00 | Insect bite, nonvenomous, of trunk, infected                |
| 18 | SD15000 | Insect bite, nonvenomous, of interscapular region, infected |
| 19 | SD15100 | Insect bite, nonvenomous, of chest wall, infected           |
| 20 | SD15200 | Insect bite, nonvenomous, of breast, infected               |
| 21 | SD15300 | Insect bite, nonvenomous, of abdominal wall, infected       |
| 22 | SD15400 | Insect bite, nonvenomous, of back, infected                 |
| 23 | SD15500 | Insect bite, nonvenomous, of buttock, infected              |
| 24 | SD15600 | Insect bite, nonvenomous, of anus, infected                 |
| 25 | SD15700 | Insect bite, nonvenomous, of flank, infected                |
| 26 | SD15800 | Insect bite, nonvenomous, of groin, infected                |
| 27 | SD15900 | Insect bite, nonvenomous, of perineum, infected             |
| 28 | SD15A00 | Insect bite, nonvenomous, of penis, infected                |
| 29 | SD15B00 | Insect bite, nonvenomous, of scrotum and testis, infected   |
| 30 | SD15B11 | Insect bite, nonvenomous, of scrotum, infected              |
| 31 | SD15B12 | Insect bite, nonvenomous, of testis, infected               |
| 32 | SD15C00 | Insect bite, nonvenomous, of vulva, infected                |
| 33 | SD15D00 | Insect bite, nonvenomous, of vagina, infected               |
| 34 | SD15z00 | Insect bite, nonvenomous, of trunk, infected, NOS           |
| 35 | SD1z.00 | Superficial injury of trunk NOS, infected                   |
| 36 | SD1z000 | Superficial injury of interscapular region NOS, infected    |
| 37 | SD1z100 | Superficial injury of chest wall NOS, infected              |
| 38 | SD1z200 | Superficial injury of breast NOS, infected                  |
| 39 | SD1z300 | Superficial injury of abdominal wall NOS, infected          |
| 40 | SD1z400 | Superficial injury of back NOS, infected                    |
| 41 | SD1z500 | Superficial injury of buttock NOS, infected                 |
| 42 | SD1z600 | Superficial injury of anus NOS, infected                    |
| 43 | SD1z700 | Superficial injury of flank NOS, infected                   |
| 44 | SD1z800 | Superficial injury of groin NOS, infected                   |
| 45 | SD1z900 | Superficial injury of perineum NOS, infected                |
| 46 | SD1zA00 | Superficial injury of penis NOS, infected                   |
| 47 | SD1zB00 | Superficial injury of scrotum and testis NOS, infected      |
| 48 | SD1zC00 | Superficial injury of vulva NOS, infected                   |
| 49 | SD1z000 | Superficial injury of trunk NOS, infection NOS              |
| 50 | SD21.00 | Abrasion or friction burn of shoulder/upper arm, infected   |
| 51 | SD21000 | Abrasion of shoulder, infected                              |
| 52 |         |                                                             |
| 53 |         |                                                             |
| 54 |         |                                                             |
| 55 |         |                                                             |
| 56 |         |                                                             |
| 57 |         |                                                             |
| 58 |         |                                                             |
| 59 |         |                                                             |
| 60 |         |                                                             |

|    |                                                                     |
|----|---------------------------------------------------------------------|
| 1  |                                                                     |
| 2  | SD21100 Abrasion of scapular region, infected                       |
| 3  | SD21200 Abrasion of axilla, infected                                |
| 4  | SD21300 Abrasion of upper arm, infected                             |
| 5  | SD21z00 Abrasion or friction burn shoulder/upper arm, infected, NOS |
| 6  | SD23.00 Blister of shoulder and upper arm, infected                 |
| 7  | SD23000 Blister of shoulder, infected                               |
| 8  | SD23100 Blister of scapular region, infected                        |
| 9  | SD23200 Blister of axilla, infected                                 |
| 10 | SD23300 Blister of upper arm, infected                              |
| 11 | SD23z00 Blister of shoulder and upper arm, infected, NOS            |
| 12 | SD25.00 Insect bite, nonvenomous, of shoulder/upper arm, infected   |
| 13 | SD25000 Insect bite, nonvenomous, of shoulder, infected             |
| 14 | SD25100 Insect bite, nonvenomous, of interscapular region, infected |
| 15 | SD25200 Insect bite, nonvenomous, of axilla, infected               |
| 16 | SD25300 Insect bite, nonvenomous, of upper arm, infected            |
| 17 | SD25z00 Insect bite, nonvenomous, shoulder/upper arm, infected, NOS |
| 18 | SD2z.00 Superficial injury of shoulder and upper arm NOS, infected  |
| 19 | SD2z000 Superficial injury of shoulder NOS, infected                |
| 20 | SD2z100 Superficial injury of scapular region NOS, infected         |
| 21 | SD2z200 Superficial injury of axilla NOS, infected                  |
| 22 | SD2z300 Superficial injury of upper arm NOS, infected               |
| 23 | SD2zz00 Superficial injury shoulder/upper arm, infection NOS        |
| 24 | SD31.00 Abrasion or friction burn of lower arm, infected            |
| 25 | SD31000 Abrasion of elbow, infected                                 |
| 26 | SD31100 Abrasion of forearm, infected                               |
| 27 | SD31200 Abrasion of wrist, infected                                 |
| 28 | SD31z00 Abrasion or friction burn of lower arm, infected, NOS       |
| 29 | SD33.00 Blister of lower arm, infected                              |
| 30 | SD33000 Blister of elbow, infected                                  |
| 31 | SD33100 Blister of forearm, infected                                |
| 32 | SD33200 Blister of wrist, infected                                  |
| 33 | SD33z00 Blister of lower arm, infected, NOS                         |
| 34 | SD35.00 Insect bite, nonvenomous, of lower arm, infected            |
| 35 | SD35000 Insect bite, nonvenomous, of elbow, infected                |
| 36 | SD35100 Insect bite, nonvenomous, of forearm, infected              |
| 37 | SD35200 Insect bite, nonvenomous, of wrist, infected                |
| 38 | SD35z00 Insect bite, nonvenomous, of lower arm, infected, NOS       |
| 39 | SD3z.00 Superficial injury of lower arm NOS, infected               |
| 40 | SD3z000 Superficial injury of elbow NOS, infected                   |
| 41 | SD3z100 Superficial injury of forearm NOS, infected                 |
| 42 | SD3z200 Superficial injury of wrist NOS, infected                   |
| 43 | SD3zz00 Superficial injury of lower arm, infected NOS               |
| 44 | SD41.00 Abrasion or friction burn of hand, infected                 |
| 45 | SD43.00 Blister of hand, infected                                   |
| 46 | SD45.00 Insect bite, nonvenomous, of hand, infected                 |
| 47 | SD4z.00 Superficial injury of hand NOS, infected                    |
| 48 | SD51.00 Abrasion or friction burn of finger, infected               |
| 49 | SD53.00 Blister of finger, infected                                 |
| 50 | SD55.00 Insect bite, nonvenomous, of finger, infected               |
| 51 | SD5z.00 Superficial injury of finger NOS, infected                  |
| 52 |                                                                     |
| 53 |                                                                     |
| 54 |                                                                     |
| 55 |                                                                     |
| 56 |                                                                     |
| 57 |                                                                     |
| 58 |                                                                     |
| 59 |                                                                     |
| 60 |                                                                     |

|    |         |                                                          |
|----|---------|----------------------------------------------------------|
| 1  |         |                                                          |
| 2  | SD61.00 | Abrasion or friction burn of lower limb, infected        |
| 3  | SD61.11 | Abrasion or friction burn of leg, infected               |
| 4  | SD61000 | Abrasion of hip, infected                                |
| 5  | SD61100 | Abrasion of thigh, infected                              |
| 6  | SD61200 | Abrasion of knee, infected                               |
| 7  | SD61300 | Abrasion of lower leg, infected                          |
| 8  | SD61400 | Abrasion of ankle, infected                              |
| 9  |         |                                                          |
| 10 | SD61z00 | Abrasion or friction burn of lower limb, infected, NOS   |
| 11 | SD63.00 | Blister of lower limb, infected                          |
| 12 | SD63.11 | Blister of leg, infected                                 |
| 13 |         |                                                          |
| 14 | SD63000 | Blister of hip, infected                                 |
| 15 | SD63100 | Blister of thigh, infected                               |
| 16 | SD63200 | Blister of knee, infected                                |
| 17 | SD63300 | Blister of lower leg, infected                           |
| 18 | SD63400 | Blister of ankle, infected                               |
| 19 |         |                                                          |
| 20 | SD63z00 | Blister of lower limb, infected, NOS                     |
| 21 | SD65.00 | Insect bite, nonvenomous, of lower limb, infected        |
| 22 | SD65.11 | Insect bite, nonvenomous, of leg, infected               |
| 23 |         |                                                          |
| 24 | SD65000 | Insect bite, nonvenomous, of hip, infected               |
| 25 | SD65100 | Insect bite, nonvenomous, of thigh, infected             |
| 26 | SD65200 | Insect bite, nonvenomous, of knee, infected              |
| 27 | SD65300 | Insect bite, nonvenomous, of lower leg, infected         |
| 28 | SD65400 | Insect bite, nonvenomous, of ankle, infected             |
| 29 |         |                                                          |
| 30 | SD65z00 | Insect bite, nonvenomous, of lower limb, infected, NOS   |
| 31 | SD6z.00 | Superficial injury of lower limb, infected               |
| 32 | SD6z000 | Superficial injury of hip NOS, infected                  |
| 33 | SD6z100 | Superficial injury of thigh NOS, infected                |
| 34 | SD6z200 | Superficial injury of knee NOS, infected                 |
| 35 | SD6z300 | Superficial injury of lower leg NOS, infected            |
| 36 | SD6z400 | Superficial injury of ankle NOS, infected                |
| 37 |         |                                                          |
| 38 | SD6zz00 | Superficial injury of lower limb, infected, NOS          |
| 39 | SD71.00 | Abrasion or friction burn of foot and toe, infected      |
| 40 | SD71.11 | Abrasion or friction burn of heel, infected              |
| 41 | SD71.12 | Abrasion or friction burn of toenail, infected           |
| 42 |         |                                                          |
| 43 | SD71000 | Abrasion of foot, infected                               |
| 44 | SD71100 | Abrasion of toe, infected                                |
| 45 | SD71z00 | Abrasion or friction burn of foot and toe, infected, NOS |
| 46 | SD73.00 | Blister of foot and toe, infected                        |
| 47 | SD73.11 | Blister of heel, infected                                |
| 48 |         |                                                          |
| 49 | SD73000 | Blister of foot, infected                                |
| 50 | SD73100 | Blister of toe, infected                                 |
| 51 | SD73z00 | Blister of foot and toe, infected, NOS                   |
| 52 | SD75.00 | Insect bite, nonvenomous, of foot and toe, infected      |
| 53 | SD75.11 | Insect bite, nonvenomous, of heel, infected              |
| 54 |         |                                                          |
| 55 | SD75000 | Insect bite, nonvenomous, of foot, infected              |
| 56 | SD75100 | Insect bite, nonvenomous, of toe, infected               |
| 57 | SD75z00 | Insect bite, nonvenomous, of foot and toe, infected, NOS |
| 58 | SD7z.00 | Superficial injury of foot and toe NOS, infected         |
| 59 | SD7z000 | Superficial injury of foot NOS, infected                 |
| 60 | SD7z100 | Superficial injury of toe NOS, infected                  |

|    |         |                                                              |
|----|---------|--------------------------------------------------------------|
| 1  |         |                                                              |
| 2  | SD7zz00 | Superficial injury of foot and toe, infected, NOS            |
| 3  | SD91.00 | Abrasion or friction burn, infected, NOS                     |
| 4  | SD95.00 | Insect bite, nonvenomous, infected, NOS                      |
| 5  | SD96000 | Foreign body in skin wound                                   |
| 6  | SD99.00 | Tick bite, infected                                          |
| 7  | SD9z.00 | Other superficial injury, infected, NOS                      |
| 8  | SH...00 | Burns                                                        |
| 9  | SH1..00 | Burn of the face, head or neck                               |
| 10 | SH1..11 | Face burns                                                   |
| 11 | SH1..12 | Head burns                                                   |
| 12 | SH10.00 | Unspecified thickness burn of the face, head or neck         |
| 13 | SH10000 | Unspecified thickness burn of unspecified part of face/head  |
| 14 | SH10100 | Unspecified thickness burn of the ear                        |
| 15 | SH10200 | Unspecified thickness burn of the eye                        |
| 16 | SH10300 | Unspecified thickness burn of the lip(s)                     |
| 17 | SH10400 | Unspecified thickness burn of the chin                       |
| 18 | SH10500 | Unspecified thickness burn of the nose                       |
| 19 | SH10600 | Unspecified thickness burn of the scalp                      |
| 20 | SH10700 | Unspecified thickness burn of the forehead                   |
| 21 | SH10800 | Unspecified thickness burn of the cheek                      |
| 22 | SH10900 | Unspecified thickness burn of the neck                       |
| 23 | SH10x00 | Unspecified thickness burn multiple sites face, head or neck |
| 24 | SH10z00 | Unspecified thickness burn of the face, head or neck NOS     |
| 25 | SH11.00 | Superficial burn of the face, head or neck                   |
| 26 | SH11.11 | Erythema of head or neck, first degree burn                  |
| 27 | SH11000 | Superficial burn of unspecified part of the face or head     |
| 28 | SH11100 | Superficial burn of the ear                                  |
| 29 | SH11200 | Superficial burn of the eye                                  |
| 30 | SH11300 | Superficial burn of the lip(s)                               |
| 31 | SH11400 | Superficial burn of the chin                                 |
| 32 | SH11500 | Superficial burn of the nose                                 |
| 33 | SH11600 | Superficial burn of the scalp                                |
| 34 | SH11700 | Superficial burn of the forehead                             |
| 35 | SH11800 | Superficial burn of the cheek                                |
| 36 | SH11900 | Superficial burn of the neck                                 |
| 37 | SH11x00 | Superficial burn of multiple sites of the face, head or neck |
| 38 | SH11z00 | Superficial burn of the face, head or neck NOS               |
| 39 | SH12.00 | Partial thickness burn of the face, head or neck             |
| 40 | SH12.11 | Blister of face, head and neck, second degree burn           |
| 41 | SH12000 | Superficial part. thickness burn unspecified part face/head  |
| 42 | SH12100 | Superficial partial thickness burn of the ear                |
| 43 | SH12111 | Ear - 2nd degree burn                                        |
| 44 | SH12200 | Superficial partial thickness burn of the eye                |
| 45 | SH12211 | Eye - 2nd degree burn                                        |
| 46 | SH12300 | Superficial partial thickness burn of the lip(s)             |
| 47 | SH12311 | Lip - 2nd degree burn                                        |
| 48 | SH12400 | Superficial partial thickness burn of the chin               |
| 49 | SH12411 | Chin - 2nd degree burn                                       |
| 50 | SH12500 | Superficial partial thickness burn of the nose               |
| 51 | SH12511 | Nose - 2nd degree burn                                       |
| 52 |         |                                                              |
| 53 |         |                                                              |
| 54 |         |                                                              |
| 55 |         |                                                              |
| 56 |         |                                                              |
| 57 |         |                                                              |
| 58 |         |                                                              |
| 59 |         |                                                              |
| 60 |         |                                                              |



|    |         |                                                              |
|----|---------|--------------------------------------------------------------|
| 1  |         |                                                              |
| 2  | SH12600 | Superficial partial thickness burn of the scalp              |
| 3  | SH12611 | Scalp - 2nd degree burn                                      |
| 4  | SH12700 | Superficial partial thickness burn of the forehead           |
| 5  | SH12711 | Forehead - 2nd degree burn                                   |
| 6  | SH12800 | Superficial partial thickness burn of the cheek              |
| 7  | SH12811 | Cheek - 2nd degree burn                                      |
| 8  | SH12900 | Superficial partial thickness burn of the neck               |
| 9  | SH12911 | Neck - 2nd degree burn                                       |
| 10 |         |                                                              |
| 11 | SH12A00 | Deep partial thickness burn of unspecified part of face/head |
| 12 | SH12B00 | Deep partial thickness burn of the ear                       |
| 13 | SH12C00 | Deep partial thickness burn of the eye                       |
| 14 | SH12D00 | Deep partial thickness burn of the lip(s)                    |
| 15 | SH12E00 | Deep partial thickness burn of the chin                      |
| 16 | SH12F00 | Deep partial thickness burn of the nose                      |
| 17 | SH12G00 | Deep partial thickness burn of the scalp                     |
| 18 | SH12H00 | Deep partial thickness burn of the forehead                  |
| 19 | SH12J00 | Deep partial thickness burn of the cheek                     |
| 20 | SH12K00 | Deep partial thickness burn of the neck                      |
| 21 | SH12x00 | Partial thickness burn of multiple sites face, head or neck  |
| 22 | SH12z00 | Partial thickness burn of the face, head or neck NOS         |
| 23 | SH13.00 | Full thickness burn of the face, head or neck                |
| 24 | SH13000 | Full thickness burn of unspecified part of the face or head  |
| 25 | SH13100 | Full thickness burn of the ear                               |
| 26 | SH13200 | Full thickness burn of the eye                               |
| 27 | SH13300 | Full thickness burn of the lip(s)                            |
| 28 | SH13400 | Full thickness burn of the chin                              |
| 29 | SH13500 | Full thickness burn of the nose                              |
| 30 | SH13600 | Full thickness burn of the scalp                             |
| 31 | SH13700 | Full thickness burn of the forehead                          |
| 32 | SH13800 | Full thickness burn of the cheek                             |
| 33 | SH13900 | Full thickness burn of the neck                              |
| 34 | SH13A00 | Corrosion of third degree of head and neck                   |
| 35 | SH13x00 | Full thickness burn of multiple sites of face, head or neck  |
| 36 | SH13z00 | Full thickness burn of the face, head or neck NOS            |
| 37 | SH14.00 | Deep full thick burn face/head/neck - without loss body part |
| 38 | SH14000 | Deep full thick burn unspec.part face/head-no loss body part |
| 39 | SH14100 | Deep full thickness burn of ear without loss of body part    |
| 40 | SH14200 | Deep full thickness burn of eye without loss of body part    |
| 41 | SH14300 | Deep full thickness burn of lip(s) without loss of body part |
| 42 | SH14400 | Deep full thickness burn of chin without loss of body part   |
| 43 | SH14500 | Deep full thickness burn of nose without loss of body part   |
| 44 | SH14600 | Deep full thickness burn of scalp without loss of body part  |
| 45 | SH14700 | Deep full thickness burn forehead without loss of body part  |
| 46 | SH14800 | Deep full thickness burn of cheek without loss of body part  |
| 47 | SH14900 | Deep full thickness burn of neck without loss of body part   |
| 48 | SH14x00 | Deep full thickness burn multip sites face/head/neck- no BPL |
| 49 | SH14z00 | Deep full thick burn, no loss body part, face/head/neck NOS  |
| 50 | SH15.00 | Deep full thick burn face/head/neck, with loss of body part  |
| 51 | SH15000 | Deep full thickness burn unspec part of face/head, with BPL  |
| 52 | SH15100 | Deep full thickness burn of the ear, with loss of body part  |
| 53 |         |                                                              |
| 54 |         |                                                              |
| 55 |         |                                                              |
| 56 |         |                                                              |
| 57 |         |                                                              |
| 58 |         |                                                              |
| 59 |         |                                                              |
| 60 |         |                                                              |



|    |         |                                                              |
|----|---------|--------------------------------------------------------------|
| 1  |         |                                                              |
| 2  | SH15200 | Deep full thickness burn of the eye, with loss of body part  |
| 3  | SH15300 | Deep full thickness burn of lip(s), with loss of body part   |
| 4  | SH15400 | Deep full thickness burn of the chin, with loss of body part |
| 5  | SH15500 | Deep full thickness burn of the nose, with loss of body part |
| 6  | SH15600 | Deep full thickness burn of scalp, with loss of body part    |
| 7  | SH15700 | Deep full thickness burn of forehead, with loss of body part |
| 8  | SH15800 | Deep full thickness burn of cheek, with loss of body part    |
| 9  | SH15900 | Deep full thickness burn of the neck, with loss of body part |
| 10 | SH15x00 | Deep full thick burn multip parts face/head/neck - with BPL  |
| 11 | SH15z00 | Deep full thick burn, with loss body part,face/head/neck NOS |
| 12 | SH16.00 | Corrosion of head and neck                                   |
| 13 | SH16000 | Corrosion of first degree of head and neck                   |
| 14 | SH16100 | Corrosion of second degree of head and neck                  |
| 15 | SH1z.00 | Burn of the face, head or neck NOS                           |
| 16 | SH2..00 | Burn of the trunk                                            |
| 17 | SH20.00 | Unspecified thickness burn of the trunk                      |
| 18 | SH20000 | Unspecified thickness burn of unspecified part of the trunk  |
| 19 | SH20100 | Unspecified thickness burn of the breast                     |
| 20 | SH20200 | Unspecified thickness burn of the chest wall                 |
| 21 | SH20300 | Unspecified thickness burn of the abdominal wall             |
| 22 | SH20400 | Unspecified thickness burn of the back (excluding buttock)   |
| 23 | SH20500 | Unspecified thickness burn of the buttock                    |
| 24 | SH20600 | Unspecified thickness burn of the genitalia                  |
| 25 | SH20x00 | Unspecified thickness burn of multiple sites of the trunk    |
| 26 | SH20z00 | Unspecified thickness burn of the trunk NOS                  |
| 27 | SH21.00 | Superficial burn of the trunk                                |
| 28 | SH21.11 | Erythema of trunk, 1st degree burn                           |
| 29 | SH21000 | Superficial burn of unspecified part of the trunk            |
| 30 | SH21100 | Superficial burn of the breast                               |
| 31 | SH21200 | Superficial burn of the chest wall                           |
| 32 | SH21300 | Superficial burn of the abdominal wall                       |
| 33 | SH21400 | Superficial burn of the back (excluding buttock)             |
| 34 | SH21500 | Superficial burn of the buttock                              |
| 35 | SH21600 | Superficial burn of the genitalia                            |
| 36 | SH21700 | Corrosion of first degree of trunk                           |
| 37 | SH21x00 | Superficial burn of multiple sites of the trunk              |
| 38 | SH21z00 | Superficial burn of the trunk NOS                            |
| 39 | SH22.00 | Partial thickness burn of the trunk                          |
| 40 | SH22.11 | Blister of trunk, second degree burn                         |
| 41 | SH22000 | Superficial partial thickness burn unspecified part of trunk |
| 42 | SH22100 | Superficial partial thickness burn of the breast             |
| 43 | SH22200 | Superficial partial thickness burn of the chest wall         |
| 44 | SH22300 | Superficial partial thickness burn of the abdominal wall     |
| 45 | SH22400 | Superficial partial thickness burn of back (excl buttock)    |
| 46 | SH22500 | Superficial partial thickness burn of the buttock            |
| 47 | SH22600 | Superficial partial thickness burn of the genitalia          |
| 48 | SH22700 | Deep partial thickness burn of the trunk, unspecified        |
| 49 | SH22800 | Deep partial thickness burn of the breast                    |
| 50 | SH22900 | Deep partial thickness burn of the chest wall                |
| 51 | SH22A00 | Deep partial thickness burn of the abdominal wall            |
| 52 |         |                                                              |
| 53 |         |                                                              |
| 54 |         |                                                              |
| 55 |         |                                                              |
| 56 |         |                                                              |
| 57 |         |                                                              |
| 58 |         |                                                              |
| 59 |         |                                                              |
| 60 |         |                                                              |

|    |         |                                                              |
|----|---------|--------------------------------------------------------------|
| 1  |         |                                                              |
| 2  | SH22B00 | Deep partial thickness burn of the back (excluding buttock)  |
| 3  | SH22C00 | Deep partial thickness burn of the buttock                   |
| 4  | SH22D00 | Deep partial thickness burn of the genitalia                 |
| 5  | SH22E00 | Corrosion of second degree of trunk                          |
| 6  | SH22x00 | Partial thickness burn of multiple sites of the trunk        |
| 7  | SH22z00 | Partial thickness burn of the trunk NOS                      |
| 8  | SH23.00 | Full thickness burn of the trunk                             |
| 9  | SH23000 | Full thickness burn of the trunk, unspecified                |
| 10 | SH23100 | Full thickness burn of the breast                            |
| 11 | SH23200 | Full thickness burn of the chest wall                        |
| 12 | SH23300 | Full thickness burn of the abdominal wall                    |
| 13 | SH23400 | Full thickness burn of the back (excluding buttock)          |
| 14 | SH23500 | Full thickness burn of the buttock                           |
| 15 | SH23600 | Full thickness burn of the genitalia                         |
| 16 | SH23700 | Corrosion of third degree of trunk                           |
| 17 | SH23x00 | Full thickness burn of multiple sites of the trunk           |
| 18 | SH23z00 | Full thickness burn of the trunk NOS                         |
| 19 | SH24.00 | Deep full thickness burn of trunk without loss of body part  |
| 20 | SH24000 | Deep full thickness burn of trunk unsp, no loss of body part |
| 21 | SH24100 | Deep full thickness burn of breast without loss of body part |
| 22 | SH24200 | Deep full thickness burn of chest without loss of body part  |
| 23 | SH24300 | Deep full thickness burn of abdom.wall, no loss of body part |
| 24 | SH24400 | Deep full thickness burn of back without loss of body part   |
| 25 | SH24500 | Deep full thickness burn of buttock, no loss of body part    |
| 26 | SH24600 | Deep full thickness burn of genitalia, no loss of body part  |
| 27 | SH24x00 | Deep full thickness burn multiple sites trunk, no BPL        |
| 28 | SH24z00 | Deep full thickness burn of trunk, no loss of body part NOS  |
| 29 | SH25.00 | Deep full thickness burn of trunk, with loss of body part    |
| 30 | SH25000 | Deep full thickness burn of trunk unsp, with loss body part  |
| 31 | SH25100 | Deep full thickness burn of breast, with loss of body part   |
| 32 | SH25200 | Deep full thickness burn of chest, with loss of body part    |
| 33 | SH25300 | Deep full thickness burn of abd.wall, with loss of body part |
| 34 | SH25400 | Deep full thickness burn of back, with loss of body part     |
| 35 | SH25500 | Deep full thickness burn of buttock, with loss of body part  |
| 36 | SH25600 | Deep full thickness burn of genitalia, with loss body part   |
| 37 | SH25x00 | Deep full thickness burn multiple sites trunk with BPL       |
| 38 | SH25z00 | Deep full thickness burn of trunk, with loss body part, NOS  |
| 39 | SH26.00 | Corrosion of unspecified degree of trunk                     |
| 40 | SH2z.00 | Burn of the trunk NOS                                        |
| 41 | SH3..00 | Burn of the arm (excluding wrist and hand)                   |
| 42 | SH30.00 | Unspecified thickness burn of the arm                        |
| 43 | SH30000 | Unspecified thickness burn of the arm, unspecified           |
| 44 | SH30100 | Unspecified thickness burn of the forearm                    |
| 45 | SH30200 | Unspecified thickness burn of the elbow                      |
| 46 | SH30300 | Unspecified thickness burn of the upper arm                  |
| 47 | SH30400 | Unspecified thickness burn of the axilla                     |
| 48 | SH30500 | Unspecified thickness burn of the shoulder                   |
| 49 | SH30600 | Unspecified thickness burn of the scapular region            |
| 50 | SH30x00 | Unspecified thickness burn of multiple sites of the arm      |
| 51 | SH30z00 | Unspecified thickness burn of the arm NOS                    |

|    |         |                                                              |
|----|---------|--------------------------------------------------------------|
| 1  |         |                                                              |
| 2  | SH31.00 | Superficial burn of the arm                                  |
| 3  | SH31.11 | Erythema of arm, first degree burn                           |
| 4  | SH31000 | Superficial burn of the arm, unspecified                     |
| 5  | SH31100 | Superficial burn of the forearm                              |
| 6  | SH31200 | Superficial burn of the elbow                                |
| 7  | SH31300 | Superficial burn of the upper arm                            |
| 8  | SH31400 | Superficial burn of the axilla                               |
| 9  | SH31500 | Superficial burn of the shoulder                             |
| 10 | SH31600 | Superficial burn of the scapular region                      |
| 11 | SH31x00 | Superficial burn of multiple sites of the arm                |
| 12 | SH31z00 | Superficial burn of the arm NOS                              |
| 13 | SH32.00 | Partial thickness burn of the arm                            |
| 14 | SH32.11 | Blister of arm, second degree burn                           |
| 15 | SH32000 | Superficial partial thickness burn of the arm, unspecified   |
| 16 | SH32100 | Superficial partial thickness burn of the forearm            |
| 17 | SH32200 | Superficial partial thickness burn of the elbow              |
| 18 | SH32300 | Superficial partial thickness burn of the upper arm          |
| 19 | SH32400 | Superficial partial thickness burn of the axilla             |
| 20 | SH32500 | Superficial partial thickness burn of the shoulder           |
| 21 | SH32600 | Superficial partial thickness burn of scapular region        |
| 22 | SH32700 | Deep partial thickness burn of the arm, unspecified          |
| 23 | SH32800 | Deep partial thickness burn of the forearm                   |
| 24 | SH32900 | Deep partial thickness burn of the elbow                     |
| 25 | SH32A00 | Deep partial thickness burn of the upper arm                 |
| 26 | SH32B00 | Deep partial thickness burn of the axilla                    |
| 27 | SH32C00 | Deep partial thickness burn of the shoulder                  |
| 28 | SH32D00 | Deep partial thickness burn of the scapular region           |
| 29 | SH32x00 | Partial thickness burn of multiple sites of the arm          |
| 30 | SH32z00 | Partial thickness burn of the arm NOS                        |
| 31 | SH33.00 | Full thickness burn of the arm                               |
| 32 | SH33000 | Full thickness burn of the arm, unspecified                  |
| 33 | SH33100 | Full thickness burn of the forearm                           |
| 34 | SH33200 | Full thickness burn of the elbow                             |
| 35 | SH33300 | Full thickness burn of the upper arm                         |
| 36 | SH33400 | Full thickness burn of the axilla                            |
| 37 | SH33500 | Full thickness burn of the shoulder                          |
| 38 | SH33600 | Full thickness burn of the scapular region                   |
| 39 | SH33x00 | Full thickness burn of multiple sites of the arm             |
| 40 | SH33z00 | Full thickness burn of the arm NOS                           |
| 41 | SH34.00 | Deep full thickness burn of arm without loss of body part    |
| 42 | SH34000 | Deep full thickness burn of arm unsp, no loss of body part   |
| 43 | SH34100 | Deep full thickness burn of forearm, no loss of body part    |
| 44 | SH34200 | Deep full thickness burn of elbow without loss of body part  |
| 45 | SH34300 | Deep full thickness burn of upper arm, no loss of body part  |
| 46 | SH34400 | Deep full thickness burn of axilla without loss of body part |
| 47 | SH34500 | Deep full thickness burn of shoulder, no loss of body part   |
| 48 | SH34600 | Deep full thickness burn of scapular, no loss of body part   |
| 49 | SH34x00 | Deep full thickness burn of multiple sites of arm, no BPL    |
| 50 | SH34z00 | Deep full thickness burn without loss of body part-arm NOS   |
| 51 | SH35.00 | Deep full thickness burn of arm, with loss of body part      |
| 52 |         |                                                              |
| 53 |         |                                                              |
| 54 |         |                                                              |
| 55 |         |                                                              |
| 56 |         |                                                              |
| 57 |         |                                                              |
| 58 |         |                                                              |
| 59 |         |                                                              |
| 60 |         |                                                              |

|    |         |                                                              |
|----|---------|--------------------------------------------------------------|
| 1  |         |                                                              |
| 2  | SH35000 | Deep full thickness burn of arm unsp, with loss of body part |
| 3  | SH35100 | Deep full thickness burn of forearm, with loss of body part  |
| 4  | SH35200 | Deep full thickness burn of elbow, with loss of body part    |
| 5  | SH35300 | Deep full thickness burn of upper arm,with loss of body part |
| 6  | SH35400 | Deep full thickness burn of axilla, with loss of body part   |
| 7  | SH35500 | Deep full thickness burn of shoulder, with loss of body part |
| 8  | SH35600 | Deep full thickness burn of scapular, with loss of body part |
| 9  | SH35x00 | Deep full thickness burn of multiple sites of arm with BPL   |
| 10 | SH35z00 | Deep full thickness burn-, with loss of body part-arm NOS    |
| 11 | SH36.00 | Corros/unspecf degree/shoulder+upper limb,except wrist+hand  |
| 12 | SH36000 | Corrosion/1st degree shoulder+upper limb,except wrist+hand   |
| 13 | SH36100 | Corrosion/2nd degree/shoulder and upper limb exc wrist+hand  |
| 14 | SH36200 | Corros/third degree/shoulder and upper limb, exc wrist+hand  |
| 15 | SH3z.00 | Burn of the arm (excluding wrist and hand) NOS               |
| 16 | SH4..00 | Burn of the wrist(s) and hand(s)                             |
| 17 | SH40.00 | Unspecified thickness burn of the wrist and hand             |
| 18 | SH40.11 | Unspecified degree burn of finger                            |
| 19 | SH40.12 | Unspecified degree burn of hand                              |
| 20 | SH40.13 | Unspecified degree burn of thumb                             |
| 21 | SH40.14 | Unspecified degree burn of wrist                             |
| 22 | SH40000 | Unspecified thickness burn of the hand, unspecified          |
| 23 | SH40100 | Unspecified thickness burn of a single finger                |
| 24 | SH40200 | Unspecified thickness burn of the thumb                      |
| 25 | SH40300 | Unspecified thickness burn of more than one finger           |
| 26 | SH40400 | Unspecified thickness burn of the thumb and finger(s)        |
| 27 | SH40500 | Unspecified thickness burn of the palm of hand               |
| 28 | SH40600 | Unspecified thickness burn of the back of hand               |
| 29 | SH40700 | Unspecified thickness burn of the wrist                      |
| 30 | SH40x00 | Unspecified thickness burn of multiple sites of wrist/hand   |
| 31 | SH40z00 | Unspecified thickness burn of the wrist or hand NOS          |
| 32 | SH41.00 | Superficial burn of the wrist and hand                       |
| 33 | SH41.11 | Erythema of wrist and hand,first degree burn                 |
| 34 | SH41.12 | First degree burn of finger                                  |
| 35 | SH41.13 | First degree burn of hand                                    |
| 36 | SH41.14 | First degree burn of thumb                                   |
| 37 | SH41.15 | First degree burn of wrist                                   |
| 38 | SH41000 | Superficial burn of the hand, unspecified                    |
| 39 | SH41100 | Superficial burn of a single finger                          |
| 40 | SH41200 | Superficial burn of the thumb                                |
| 41 | SH41300 | Superficial burn of more than one finger                     |
| 42 | SH41400 | Superficial burn of the thumb and finger(s)                  |
| 43 | SH41500 | Superficial burn of the palm of hand                         |
| 44 | SH41600 | Superficial burn of the back of hand                         |
| 45 | SH41700 | Superficial burn of the wrist                                |
| 46 | SH41x00 | First degree burn of multiple sites of the wrist or hand     |
| 47 | SH41z00 | Superficial burn of the wrist or hand NOS                    |
| 48 | SH42.00 | Partial thickness burn of the wrist and hand                 |
| 49 | SH42.11 | Blister of wrist and hand, second degree burn                |
| 50 | SH42.12 | Second degree burn of finger                                 |
| 51 | SH42.13 | Second degree burn of hand                                   |

|    |         |                                                               |
|----|---------|---------------------------------------------------------------|
| 1  |         |                                                               |
| 2  | SH42.14 | Second degree burn of thumb                                   |
| 3  | SH42.15 | Second degree burn of wrist                                   |
| 4  | SH42000 | Superficial partial thickness burn of hand, unspecified       |
| 5  | SH42100 | Superficial partial thickness burn of a single finger         |
| 6  | SH42200 | Superficial partial thickness burn of the thumb               |
| 7  | SH42300 | Superficial partial thickness burn of more than one finger    |
| 8  | SH42400 | Superficial partial thickness burn of thumb and finger(s)     |
| 9  | SH42500 | Superficial partial thickness burn of palm of hand            |
| 10 | SH42600 | Superficial partial thickness burn of back of hand            |
| 11 | SH42700 | Superficial partial thickness burn of the wrist               |
| 12 | SH42800 | Deep partial thickness burn of the hand, unspecified          |
| 13 | SH42900 | Deep partial thickness burn of a single finger                |
| 14 | SH42A00 | Deep partial thickness burn of the thumb                      |
| 15 | SH42B00 | Deep partial thickness burn of more than one finger           |
| 16 | SH42C00 | Deep partial thickness burn of the thumb and finger(s)        |
| 17 | SH42D00 | Deep partial thickness burn of the palm of hand               |
| 18 | SH42E00 | Deep partial thickness burn of back of hand                   |
| 19 | SH42F00 | Deep partial thickness burn of wrist                          |
| 20 | SH42x00 | Partial thickness burn of multiple sites of the wrist/hand    |
| 21 | SH42z00 | Partial thickness burn of the wrist or hand NOS               |
| 22 | SH43.00 | Full thickness burn of the wrist and hand                     |
| 23 | SH43.11 | Third degree burn of finger                                   |
| 24 | SH43.12 | Third degree burn of hand                                     |
| 25 | SH43.13 | Third degree burn of thumb                                    |
| 26 | SH43.14 | Third degree burn of wrist                                    |
| 27 | SH43000 | Full thickness burn of the hand, unspecified                  |
| 28 | SH43100 | Full thickness burn of a single finger                        |
| 29 | SH43200 | Full thickness burn of the thumb                              |
| 30 | SH43300 | Full thickness burn of more than one finger                   |
| 31 | SH43400 | Full thickness burn of the thumb and finger(s)                |
| 32 | SH43500 | Full thickness burn of the palm of hand                       |
| 33 | SH43600 | Full thickness burn of the back of hand                       |
| 34 | SH43700 | Full thickness burn of the wrist                              |
| 35 | SH43x00 | Full thickness burn of multiple sites of the wrist or hand    |
| 36 | SH43z00 | Full thickness burn of the wrist or hand NOS                  |
| 37 | SH44.00 | Deep full thickness burn of wrist/hand, no loss of body part  |
| 38 | SH44.11 | Deep third degree burn of finger, without loss of a body part |
| 39 | SH44.12 | Deep third degree burn of hand, without loss of a body part   |
| 40 | SH44.13 | Deep third degree burn of thumb, without loss of a body part  |
| 41 | SH44.14 | Deep third degree burn of wrist, without loss of a body part  |
| 42 | SH44000 | Deep full thickness burn of hand unsp, no loss of body part   |
| 43 | SH44100 | Deep full thickness burn of a finger, no loss of body part    |
| 44 | SH44200 | Deep full thickness burn of thumb without loss of body part   |
| 45 | SH44300 | Deep full thickness burn of >1 finger, no loss of body part   |
| 46 | SH44400 | Deep full thickness burn of thumb+fing, no loss of body part  |
| 47 | SH44500 | Deep full thickness burn of palm hand, no loss of body part   |
| 48 | SH44600 | Deep full thickness burn of back hand, no loss of body part   |
| 49 | SH44700 | Deep full thickness burn of wrist without loss of body part   |
| 50 | SH44x00 | Deep full thickness burn-multiple sites wrist/hand, no BPL    |
| 51 | SH44z00 | Deep full thickness burn of wrist/hand, no loss body part NOS |
| 52 |         |                                                               |
| 53 |         |                                                               |
| 54 |         |                                                               |
| 55 |         |                                                               |
| 56 |         |                                                               |
| 57 |         |                                                               |
| 58 |         |                                                               |
| 59 |         |                                                               |
| 60 |         |                                                               |

|    |         |                                                              |
|----|---------|--------------------------------------------------------------|
| 1  |         |                                                              |
| 2  | SH45.00 | Deep full thickness burn of wrist/hand, with loss body part  |
| 3  | SH45.11 | Deep third degree burn of finger with loss of a body part    |
| 4  | SH45.12 | Deep third degree burn of hand with loss of a body part      |
| 5  | SH45.13 | Deep third degree burn of thumb with loss of a body part     |
| 6  | SH45.14 | Deep third degree burn of wrist with loss of a body part     |
| 7  | SH45000 | Deep full thickness burn of hand unsp, with loss body part   |
| 8  | SH45100 | Deep full thickness burn of a finger, with loss of body part |
| 9  | SH45200 | Deep full thickness burn of thumb, with loss of body part    |
| 10 | SH45300 | Deep full thickness burn of >1 finger, with loss body part   |
| 11 | SH45400 | Deep full thickness burn of thumb+fing, with loss body part  |
| 12 | SH45500 | Deep full thickness burn of palm hand, with loss body part   |
| 13 | SH45600 | Deep full thickness burn of back hand, with loss body part   |
| 14 | SH45700 | Deep full thickness burn of wrist, with loss of body part    |
| 15 | SH45x00 | Deep full thickness burn-multiple sites wrist/hand with BPL  |
| 16 | SH45z00 | Deep full thickness burn wrist/hand, with loss body part NOS |
| 17 | SH46.00 | Corrosion of wrist and hand                                  |
| 18 | SH46000 | Corrosion of first degree of wrist and hand                  |
| 19 | SH46100 | Corrosion of second degree of wrist and hand                 |
| 20 | SH46200 | Corrosion of third degree of wrist and hand                  |
| 21 | SH4z.00 | Burn of wrist or hand NOS                                    |
| 22 | SH5..00 | Burn of lower limbs                                          |
| 23 | SH5..11 | Leg burns                                                    |
| 24 | SH50.00 | Unspecified thickness burn of the leg                        |
| 25 | SH50000 | Unspecified degree burn of the leg, unspecified              |
| 26 | SH50100 | Unspecified thickness burn of the toe(s)                     |
| 27 | SH50200 | Unspecified thickness burn of the foot                       |
| 28 | SH50300 | Unspecified thickness burn of the ankle                      |
| 29 | SH50400 | Unspecified thickness burn of the lower leg                  |
| 30 | SH50500 | Unspecified thickness burn of the knee                       |
| 31 | SH50600 | Unspecified thickness burn of the thigh                      |
| 32 | SH50x00 | Unspecified thickness burn of multiple sites of the leg      |
| 33 | SH50z00 | Unspecified thickness burn of the leg NOS                    |
| 34 | SH51.00 | Superficial burn of the leg                                  |
| 35 | SH51.11 | Erythema of leg, first degree burn                           |
| 36 | SH51000 | Superficial burn of the leg, unspecified                     |
| 37 | SH51100 | Superficial burn of the toe(s)                               |
| 38 | SH51200 | Superficial burn of the foot                                 |
| 39 | SH51300 | Superficial burn of the ankle                                |
| 40 | SH51400 | Superficial burn of the lower leg                            |
| 41 | SH51500 | Superficial burn of the knee                                 |
| 42 | SH51600 | Superficial burn of the thigh                                |
| 43 | SH51x00 | Superficial burn of multiple sites of the leg                |
| 44 | SH51z00 | Superficial burn of the leg NOS                              |
| 45 | SH52.00 | Partial thickness burn of the leg                            |
| 46 | SH52.11 | Blister of leg, second degree burn                           |
| 47 | SH52000 | Superficial partial thickness burn of the leg, unspecified   |
| 48 | SH52100 | Superficial partial thickness burn of the toe(s)             |
| 49 | SH52200 | Superficial partial thickness burn of the foot               |
| 50 | SH52300 | Superficial partial thickness burn of the ankle              |
| 51 | SH52400 | Superficial partial thickness burn of the lower leg          |







|    |         |                                                              |
|----|---------|--------------------------------------------------------------|
| 1  |         |                                                              |
| 2  | SH6..00 | Burn of multiple specified sites                             |
| 3  | SH60.00 | Unspecified thickness burn of multiple specified sites       |
| 4  | SH61.00 | Superficial burn of multiple specified sites                 |
| 5  | SH62.00 | Partial thickness burn of multiple specified sites           |
| 6  | SH62000 | Superficial partial thickness burn multiple specified sites  |
| 7  | SH62100 | Deep partial thickness burn of multiple specified sites      |
| 8  | SH63.00 | Full thickness burn of multiple specified sites              |
| 9  | SH64.00 | Deep full thickness burn multiple specified sites, no BPL    |
| 10 | SH65.00 | Deep full thickness burn multiple specified sites, with BPL  |
| 11 | SH66.00 | Corrosions of multiple regions, unspecified degree           |
| 12 | SH66000 | Corros/multiple reg,no more than first-deg corros mentioned  |
| 13 | SH66100 | Corrosion/multi reg,no more than second-deg corros mentioned |
| 14 | SH66300 | Corros/multi reg,at least one corros/third degree mentioned  |
| 15 | SH6z.00 | Burn of multiple specified sites NOS                         |
| 16 | SH8..00 | Burns as a percentage of body surface (BS) involved          |
| 17 | SH80.00 | Burn involving <10% of body surface (BS)                     |
| 18 | SH80000 | Burn:<10% of body surface, 10%/unspec BS full thickness      |
| 19 | SH80100 | Corrosions involving less than 10% of body surface           |
| 20 | SH80z00 | Burn:<10% of body surface NOS                                |
| 21 | SH81.00 | Burn involving 10-19% of body surface (BS)                   |
| 22 | SH81000 | Burn: 10-14% of body surface,<10%/unsp BS full thickness     |
| 23 | SH81100 | Burn: 10-14% of body surface, 10-14% BS full thickness       |
| 24 | SH81200 | Burn: 15-19% of body surface,<10%/unsp BS full thickness     |
| 25 | SH81300 | Burn: 15-19% of body surface, 10-19% BS full thickness       |
| 26 | SH81400 | Corrosions involving 10-19% of body surface                  |
| 27 | SH81z00 | Burn: 10-19% of body surface NOS                             |
| 28 | SH82.00 | Burn involving 20-29% of body surface (BS)                   |
| 29 | SH82000 | Burn: 20-29% of body surface,<10%/unspec BS full thickness   |
| 30 | SH82100 | Burn: 20-29% of body surface, 10-19% BS full thickness       |
| 31 | SH82200 | Burn: 20-29% of body surface, 20-29% BS full thickness       |
| 32 | SH82300 | Corrosions involving 20-29% of body surface                  |
| 33 | SH82z00 | Burn: 20-29% of body surface NOS                             |
| 34 | SH83.00 | Burn involving 30-39% of body surface (BS)                   |
| 35 | SH83000 | Burn: 30-39% of body surface,<10%/unspec BS full thickness   |
| 36 | SH83100 | Burn: 30-39% of body surface, 10-19% BS full thickness       |
| 37 | SH83200 | Burn: 30-39% of body surface, 20-29% BS full thickness       |
| 38 | SH83300 | Burn: 30-39% of body surface, 30-39% BS full thickness       |
| 39 | SH83400 | Corrosions involving 30-39% of body surface                  |
| 40 | SH83z00 | Burn: 30-39% of body surface NOS                             |
| 41 | SH84.00 | Burn involving 40-49% of body surface (BS)                   |
| 42 | SH84000 | Burn: 40-49% of body surface,<10%/unspec BS full thickness   |
| 43 | SH84100 | Burn: 40-49% of body surface, 10-19% BS full thickness       |
| 44 | SH84200 | Burn: 40-49% of body surface, 20-29% BS full thickness       |
| 45 | SH84300 | Burn: 40-49% of body surface, 30-39% BS full thickness       |
| 46 | SH84400 | Burn: 40-49% of body surface, 40-49% BS full thickness       |
| 47 | SH84500 | Corrosions involving 40-49% of body surface                  |
| 48 | SH84z00 | Burn: 40-49% of body surface NOS                             |
| 49 | SH85.00 | Burn involving 50-59% of body surface (BS)                   |
| 50 | SH85000 | Burn: 50-59% of body surface,<10%/unspec BS full thickness   |
| 51 | SH85100 | Burn: 50-59% of body surface, 10-19% BS full thickness       |
| 52 |         |                                                              |
| 53 |         |                                                              |
| 54 |         |                                                              |
| 55 |         |                                                              |
| 56 |         |                                                              |
| 57 |         |                                                              |
| 58 |         |                                                              |
| 59 |         |                                                              |
| 60 |         |                                                              |

|    |         |                                                             |
|----|---------|-------------------------------------------------------------|
| 1  |         |                                                             |
| 2  | SH85200 | Burn: 50-59% of body surface, 20-29% BS full thickness      |
| 3  | SH85300 | Burn: 50-59% of body surface, 30-39% BS full thickness      |
| 4  | SH85400 | Burn: 50-59% of body surface, 40-49% BS full thickness      |
| 5  | SH85500 | Burn: 50-59% of body surface, 50-59% BS full thickness      |
| 6  | SH85600 | Corrosions involving 50-59% of body surface                 |
| 7  | SH85z00 | Burn: 50-59% of body surface NOS                            |
| 8  | SH86.00 | Burn involving 60-69% of body surface (BS)                  |
| 9  | SH86000 | Burn: 60-69% of body surface, <10%/unspec BS full thickness |
| 10 | SH86100 | Burn: 60-69% of body surface, 10-19% BS full thickness      |
| 11 | SH86200 | Burn: 60-69% of body surface, 20-29% BS full thickness      |
| 12 | SH86300 | Burn: 60-69% of body surface, 30-39% BS full thickness      |
| 13 | SH86400 | Burn: 60-69% of body surface, 40-49% BS full thickness      |
| 14 | SH86500 | Burn: 60-69% of body surface, 50-59% BS full thickness      |
| 15 | SH86600 | Burn: 60-69% of body surface, 60-69% BS full thickness      |
| 16 | SH86700 | Corrosions involving 60-69% of body surface                 |
| 17 | SH86z00 | Burn: 60-69% of body surface NOS                            |
| 18 | SH87.00 | Burn involving 70-79% of body surface (BS)                  |
| 19 | SH87000 | Burn: 70-79% of body surface, <10%/unspec BS full thickness |
| 20 | SH87100 | Burn: 70-79% of body surface, 10-19% BS full thickness      |
| 21 | SH87200 | Burn: 70-79% of body surface, 20-29% BS full thickness      |
| 22 | SH87300 | Burn: 70-79% of body surface, 30-39% BS full thickness      |
| 23 | SH87400 | Burn: 70-79% of body surface, 40-49% BS full thickness      |
| 24 | SH87500 | Burn: 70-79% of body surface, 50-59% BS full thickness      |
| 25 | SH87600 | Burn: 70-79% of body surface, 60-69% BS full thickness      |
| 26 | SH87700 | Burn: 70-79% of body surface, 70-79% BS full thickness      |
| 27 | SH87800 | Corrosions involving 70-79% of body surface                 |
| 28 | SH87z00 | Burn: 70-79% of body surface NOS                            |
| 29 | SH88.00 | Burn involving 80-89% of body surface (BS)                  |
| 30 | SH88000 | Burn: 80-89% of body surface, <10%/unspec BS full thickness |
| 31 | SH88100 | Burn: 80-89% of body surface, 10-19% =full thickness        |
| 32 | SH88200 | Burn: 80-89% of body surface, 20-29% BS full thickness      |
| 33 | SH88300 | Burn: 80-89% of body surface, 30-39% BS full thickness      |
| 34 | SH88400 | Burn: 80-89% of body surface, 40-49% BS full thickness      |
| 35 | SH88500 | Burn: 80-89% of body surface, 50-59% BS full thickness      |
| 36 | SH88600 | Burn: 80-89% of body surface, 60-69% BS full thickness      |
| 37 | SH88700 | Burn: 80-89% of body surface, 70-79% BS full thickness      |
| 38 | SH88800 | Burn: 80-89% of body surface, 80-89% BS full thickness      |
| 39 | SH88900 | Corrosions involving 80-89% of body surface                 |
| 40 | SH88z00 | Burn: 80-89% of body surface, NOS                           |
| 41 | SH89.00 | Burn involving >90% of body surface (BS)                    |
| 42 | SH89000 | Burn: >90% of body surface, <10%/unspec BS full thickness   |
| 43 | SH89100 | Burn: >90% of body surface, 10-19% BS full thickness        |
| 44 | SH89200 | Burn: >90% of body surface, 20-29% BS full thickness        |
| 45 | SH89300 | Burn: >90% of body surface, 30-39% BS full thickness        |
| 46 | SH89400 | Burn: >90% of body surface, 40-49% BS full thickness        |
| 47 | SH89500 | Burn: >90% of body surface, 50-59% BS full thickness        |
| 48 | SH89600 | Burn: >90% of body surface, 60-69% BS full thickness        |
| 49 | SH89700 | Burn: >90% of body surface, 70-79% BS full thickness        |
| 50 | SH89800 | Burn: >90% of body surface, 80-89% BS full thickness        |
| 51 | SH89900 | Burn: >90% of body surface, >90% BS full thickness          |
| 52 |         |                                                             |
| 53 |         |                                                             |
| 54 |         |                                                             |
| 55 |         |                                                             |
| 56 |         |                                                             |
| 57 |         |                                                             |
| 58 |         |                                                             |
| 59 |         |                                                             |
| 60 |         |                                                             |

|    |         |                                                              |
|----|---------|--------------------------------------------------------------|
| 1  |         |                                                              |
| 2  | SH89A00 | Corrosions involving 90% or more of body surface             |
| 3  | SH89z00 | Burn: >90% of body surface NOS                               |
| 4  | SH8z.00 | Burn as a percentage of body surface involved NOS            |
| 5  | SH9..00 | Burn - unspecified                                           |
| 6  | SH90.00 | Unspecified degree of burn NOS                               |
| 7  | SH91.00 | Superficial burn NOS                                         |
| 8  | SH91.11 | First degree burn                                            |
| 9  | SH92.00 | Partial thickness burn NOS                                   |
| 10 | SH92.11 | Second degree burn                                           |
| 11 | SH92000 | Superficial partial thickness burn NOS                       |
| 12 | SH92100 | Deep partial thickness burn NOS                              |
| 13 | SH93.00 | Full thickness burn NOS                                      |
| 14 | SH93.11 | Third degree burn                                            |
| 15 | SH94.00 | Deep full thickness burn, without loss of body part, NOS     |
| 16 | SH95.00 | Deep full thickness burn, with loss of body part, NOS        |
| 17 | SH9z.00 | Burn - unspecified                                           |
| 18 | SHz..00 | Burns NOS                                                    |
| 19 | SK03.00 | Post-traumatic wound infection NEC                           |
| 20 | SK1x200 | Multiple open wounds of neck                                 |
| 21 | SK1x500 | Multiple open wounds of abdomen, lower back and pelvis       |
| 22 | SK1x700 | Multiple open wounds of forearm                              |
| 23 | SK1x800 | Multiple open wounds of lower leg                            |
| 24 | SK1x900 | Open wounds involv thorax with abdomen,lwr back and pelvis   |
| 25 | SK1xA00 | Open wounds invol multi regions of up limb(s) wth lw limb(s) |
| 26 | SP23.00 | Operation wound disruption                                   |
| 27 | SP23000 | Operation wound dehiscence                                   |
| 28 | SP23011 | Postoperative wound breakdown                                |
| 29 | SP23100 | Operation wound rupture                                      |
| 30 | SP23200 | Surgical wound necrosis                                      |
| 31 | SP23300 | Burst abdomen NEC                                            |
| 32 | SP23400 | Breakdown of totally implantable venous access device port   |
| 33 | SP23z00 | Operation wound disruption NOS                               |
| 34 | SP23z11 | Delayed healing surgical wound                               |
| 35 | SP23z12 | Healing delayed surgical wound                               |
| 36 | SP23z13 | Wound surgical healing delayed                               |
| 37 | SP24300 | Foreign body left in wound                                   |
| 38 | SP25000 | Postoperative stitch abscess                                 |
| 39 | SP25100 | Postoperative wound abscess                                  |
| 40 | SP25500 | Postoperative wound infection, unspecified                   |
| 41 | SP25600 | Postoperative wound infection-deep                           |
| 42 | SP25700 | Postoperative wound infection-superficial                    |
| 43 | SP25800 | MRSA infection of postoperative wound                        |
| 44 | SP28.00 | Postoperative wound sinus                                    |
| 45 | SQ...00 | Open wounds involving multiple body regions                  |
| 46 | Syu0200 | [X]Open wound of other parts of head                         |
| 47 | Syu0A00 | [X]Penetrating wound of orbit with or without foreign body   |
| 48 | Syu1300 | [X]Open wound of other parts of the neck                     |
| 49 | Syu1400 | [X]Open wound of neck, part unspecified                      |
| 50 | Syu2500 | [X]Open wound of other parts of thorax                       |
| 51 | Syu2600 | [X]Open wound of thorax, part unspecified                    |
| 52 |         |                                                              |
| 53 |         |                                                              |
| 54 |         |                                                              |
| 55 |         |                                                              |
| 56 |         |                                                              |
| 57 |         |                                                              |
| 58 |         |                                                              |
| 59 |         |                                                              |
| 60 |         |                                                              |

|    |         |                                                              |
|----|---------|--------------------------------------------------------------|
| 1  |         |                                                              |
| 2  | Syu3200 | [X]Open wound of oth and unspecif external genital organs    |
| 3  | Syu3300 | [X]Open wound oth & unspecif part abdomen/lower back/pelvis  |
| 4  | Syu4100 | [X]Open wound of oth & unspecif parts of should & upper arm  |
| 5  | Syu5200 | [X]Open wound of other parts of forearm                      |
| 6  | Syu6200 | [X]Open wound of other parts of wrist and hand               |
| 7  | Syu7100 | [X]Open wound of other parts of hip and thigh                |
| 8  | Syu8200 | [X]Open wound of other parts of lower leg                    |
| 9  | Syu9200 | [X]Open wound of other parts of foot                         |
| 10 | Syu9300 | [X]Open wound of other parts of ankle and foot               |
| 11 | SyuA100 | [X]Open wounds involving other combinations of body regions  |
| 12 | SyuBA00 | [X]Open wound of unspecified body region                     |
| 13 | SyuD.00 | [X]Burns and corrosions                                      |
| 14 | SyuD000 | [X]Burns of other parts of eye and adnexa                    |
| 15 | SyuD800 | [X]Burns of mult reg, at least 1 burn of 3rd deg mentioned   |
| 16 | SyuD900 | [X]Corrosn multi reg, at least 1 corr of 3rd deg mentioned   |
| 17 | SyuJ000 | [X]Post-traumatic wound infection, not elsewhere classified  |
| 18 | TG80000 | Accidental burning/scalding caused by boiling water, unspec  |
| 19 | TG80100 | Accidental burning/scalding caused by boiling liquid, unspec |
| 20 | TG80200 | Accidental burning or scalding caused by liquid metal        |
| 21 | TG80300 | Accidental burning or scalding caused by steam               |
| 22 | TG80400 | Accidental burning/scalding by boiling water from kettle     |
| 23 | TG80500 | Accidental burning/scalding by boiling water from saucepan   |
| 24 | TG80600 | Accidental burning or scalding caused by tea                 |
| 25 | TG80700 | Accidental burning or scalding caused by coffee              |
| 26 | TG80800 | Accidental burning or scalding caused by chocolate           |
| 27 | TG80900 | Accidental burning or scalding caused by milk                |
| 28 | TG80A00 | Accidental burning/scalding caused by soup, stew or curries  |
| 29 | TG80B00 | Accidental burning or scalding caused by fat                 |
| 30 | TG80C00 | Accidental burning or scalding caused by steam from kettle   |
| 31 | TG80D00 | Accidental burning or scalding by steam from car radiator    |
| 32 | TG80y00 | Accidental burning or scalding caused by other hot vapour    |
| 33 | TG80z00 | Accidental burning/scalding caused by hot liquid/vapour NOS  |
| 34 | TGyz700 | Accidental wound NOS                                         |
| 35 | Z174M00 | Pressure area care                                           |
| 36 | Z174M11 | PAC - Pressure area care                                     |
| 37 | Z174N00 | Wound care                                                   |
| 38 | Z174N11 | WOUND TREATMENT                                              |
| 39 | Z174N12 | WOUND THERAPY                                                |
| 40 | Z174O00 | Post-surgical wound care                                     |
| 41 | Z174O11 | Post-operative wound care                                    |
| 42 | Z174P00 | Pressure sore care                                           |
| 43 | Z174Q00 | Skin ulcer care                                              |
| 44 | Z1B..00 | Dressing of skin or wound                                    |
| 45 | Z1B..11 | Application of dressing                                      |
| 46 | Z1B..12 | Dressing                                                     |
| 47 | Z1B1.00 | Attention to dressing of skin                                |
| 48 | Z1B1100 | Checking dressing of skin                                    |
| 49 | Z1B1200 | Checking dressing for leakage                                |
| 50 | Z1B1300 | Change of dressing                                           |
| 51 | Z1B1311 | Repeating dressing                                           |
| 52 |         |                                                              |
| 53 |         |                                                              |
| 54 |         |                                                              |
| 55 |         |                                                              |
| 56 |         |                                                              |
| 57 |         |                                                              |
| 58 |         |                                                              |
| 59 |         |                                                              |
| 60 |         |                                                              |

|    |         |                                         |
|----|---------|-----------------------------------------|
| 1  |         |                                         |
| 2  | Z1B1312 | Reapplying a fresh dressing             |
| 3  | Z1B1313 | Redressing wound                        |
| 4  | Z1B1400 | Attention to dressing of burnt skin     |
| 5  | Z1B2.00 | Dressing of skin                        |
| 6  | Z1B2100 | Dressing of burnt skin                  |
| 7  | Z1B2111 | Burn dressing                           |
| 8  | Z1B2200 | Covering burnt skin with plastic bag    |
| 9  | Z1B2300 | Dressing of skin ulcer                  |
| 10 | Z1B3.00 | Dressing of pressure sore               |
| 11 | Z1O6100 | Exposing wound to air                   |
| 12 | Z1R2.00 | Cleaning wound                          |
| 13 | Z1R2.11 | Cleansing wound                         |
| 14 | Z1R2.12 | Wound toilet                            |
| 15 | Z1R3.00 | Debridement of skin                     |
| 16 | Z1R3.11 | Debridement of wound of skin            |
| 17 | Z1R3.12 | Wound debridement                       |
| 18 | Z1R3.13 | Wound debridement                       |
| 19 | Z1R3100 | Debridement of wound with topical agent |
| 20 | Z1R3200 | Surgical debridement of wound           |
| 21 | Z1R4.00 | Removal of slough from skin             |
| 22 | Z1R4.11 | Desloughing wound                       |
| 23 | Z1R5.00 | Removal of contaminant from skin        |
| 24 | ZA13E00 | Insertion of quill in the nail bed      |
| 25 | ZA14.00 | Ablation of nail bed                    |
| 26 | ZA14.11 | Ablation of nail matrix                 |
| 27 | ZA14100 | Total ablation of nail matrix           |
| 28 | ZA14200 | Partial ablation of nail matrix         |
| 29 | ZQ37.00 | Wound assessment                        |
| 30 | ZQ38.00 | Assessment of fluid loss from wound     |
| 31 | ZQ38.11 | Assessing seepage from wound            |
| 32 | ZQ39.00 | Pressure sore assessment                |
| 33 | ZQ39.11 | Decubitus ulcer assessment              |
| 34 | ZQ39.12 | Pressure ulcer assessment               |
| 35 | ZQ39.13 | Bed sore assessment                     |
| 36 | ZQ3A.00 | Assessment of burn injuries             |
| 37 | ZQ3A.11 | Assessment of levels of burns           |
| 38 | ZR1V.00 | ASEPSIS score for wound infection       |
| 39 | Zw02D00 | [Q] Open fracture grade 1               |
| 40 | Zw02E00 | [Q] Open fracture grade 2               |
| 41 | Zw02F00 | [Q] Open fracture grade 3               |
| 42 | Zw02G00 | [Q] Open fracture grade 3A              |
| 43 | Zw02H00 | [Q] Open fracture grade 3B              |
| 44 | Zw02J00 | [Q] Open fracture grade 3C              |
| 45 | ZX14.00 | Damaging own wounds                     |
| 46 | ZX14300 | Poking fingers into wound               |
| 47 | ZX14400 | Inserting objects into wound            |
| 48 |         |                                         |
| 49 |         |                                         |
| 50 |         |                                         |
| 51 |         |                                         |
| 52 |         |                                         |
| 53 |         |                                         |
| 54 |         |                                         |
| 55 |         |                                         |
| 56 |         |                                         |
| 57 |         |                                         |
| 58 |         |                                         |
| 59 |         |                                         |
| 60 |         |                                         |

**Table S2: Patients' baseline characteristics.**

|                                                          | Abscess | Burn | Diabetic<br>foot ulcer | Leg ulcer<br>(arterial) | Leg ulcer<br>(mixed) | Leg ulcer<br>(unspecified) | Leg ulcer<br>(venous) | Open<br>wound | Pressure<br>ulcer | Surgical<br>wound | Trauma | Unspecified | All<br>wounds |
|----------------------------------------------------------|---------|------|------------------------|-------------------------|----------------------|----------------------------|-----------------------|---------------|-------------------|-------------------|--------|-------------|---------------|
| Mean age per patient<br>(years)                          | 46.0    | 47.1 | 62.3                   | 57.4                    | 67.0                 | 52.6                       | 70.9                  | 53.4          | 76.1              | 55.4              | 52.4   | 55.9        | 57.9          |
| Percentage male                                          | 42%     | 35%  | 51%                    | 22%                     | 57%                  | 39%                        | 48%                   | 40%           | 40%               | 42%               | 41%    | 49%         | 44%           |
| Percentage smoker                                        | 29%     | 24%  | 11%                    | 13%                     | 10%                  | 21%                        | 7%                    | 18%           | 7%                | 19%               | 16%    | 22%         | 17%           |
| Percentage ex-smoker                                     | 19%     | 19%  | 37%                    | 32%                     | 30%                  | 21%                        | 44%                   | 29%           | 40%               | 29%               | 23%    | 28%         | 30%           |
| Percentage non-<br>smoker                                | 51%     | 56%  | 52%                    | 55%                     | 60%                  | 58%                        | 48%                   | 51%           | 40%               | 52%               | 59%    | 49%         | 52%           |
| Percentage with<br>unknown smoking<br>status             | 2%      | 0%   | 0%                     | 0%                      | 0%                   | 0%                         | 0%                    | 2%            | 13%               | 1%                | 1%     | 1%          | 1%            |
| Mean body mass index<br>per patient (kg/m <sup>2</sup> ) | 29.7    | 27.9 | 30.9                   | 28.8                    | 32.3                 | 27.6                       | 31.5                  | 29.6          | 24.5              | 28.3              | 27.8   | 28.9        | 29.1          |
| Percentage with new<br>wounds in the study<br>period     | 79%     | 79%  | 61%                    | 33%                     | 50%                  | 68%                        | 59%                   | 87%           | 80%               | 77%               | 84%    | 80%         | 73%           |
| Percentage of all<br>wounds with a<br>recorded infection | 27%     | 13%  | 78%                    | 52%                     | 47%                  | 68%                        | 41%                   | 94%           | 13%               | 35%               | 29%    | 1%          | 40%           |



**Table S3: Percentage of patients with a comorbidity in the year before the start of their wound.** Those with diabetes are a subset of those with endocrinological comorbidities.

|                                          | Abscess | Burn | Diabetic foot ulcer | Leg ulcer (arterial) | Leg ulcer (mixed) | Leg ulcer (unspecified) | Leg ulcer (venous) | Open wound | Pressure ulcer | Surgical wound | Trauma | Unspecified | All wounds |
|------------------------------------------|---------|------|---------------------|----------------------|-------------------|-------------------------|--------------------|------------|----------------|----------------|--------|-------------|------------|
| Cardiovascular                           | 36%     | 35%  | 70%                 | 67%                  | 83%               | 45%                     | 78%                | 44%        | 53%            | 47%            | 38%    | 51%         | 53%        |
| Dermatological                           | 48%     | 52%  | 60%                 | 44%                  | 63%               | 50%                     | 41%                | 51%        | 40%            | 51%            | 54%    | 45%         | 49%        |
| Endocrinological                         | 52%     | 56%  | 99%                 | 78%                  | 97%               | 18%                     | 52%                | 69%        | 60%            | 63%            | 55%    | 57%         | 60%        |
| Diabetes                                 | 50%     | 52%  | 100%                | 78%                  | 97%               | 13%                     | 37%                | 67%        | 60%            | 59%            | 51%    | 52%         | 57%        |
| Gastroenterological                      | 29%     | 32%  | 42%                 | 67%                  | 33%               | 29%                     | 19%                | 34%        | 47%            | 37%            | 31%    | 35%         | 33%        |
| Genito-urinary                           | 21%     | 24%  | 28%                 | 44%                  | 33%               | 18%                     | 19%                | 25%        | 27%            | 28%            | 24%    | 24%         | 24%        |
| Immunological                            | 7%      | 11%  | 13%                 | 11%                  | 17%               | 3%                      | 11%                | 10%        | 7%             | 9%             | 8%     | 9%          | 9%         |
| Malnutrition                             | 0%      | 2%   | 2%                  | 0%                   | 0%                | 5%                      | 4%                 | 1%         | 13%            | 1%             | 2%     | 3%          | 3%         |
| Musculoskeletal                          | 41%     | 56%  | 62%                 | 67%                  | 63%               | 61%                     | 59%                | 49%        | 73%            | 57%            | 49%    | 56%         | 56%        |
| Neurological                             | 16%     | 21%  | 24%                 | 11%                  | 27%               | 24%                     | 33%                | 18%        | 67%            | 22%            | 17%    | 17%         | 24%        |
| Oncological                              | 14%     | 16%  | 25%                 | 11%                  | 20%               | 16%                     | 7%                 | 14%        | 27%            | 18%            | 15%    | 19%         | 16%        |
| Ophthalmological                         | 8%      | 15%  | 20%                 | 0%                   | 27%               | 13%                     | 4%                 | 11%        | 33%            | 13%            | 11%    | 10%         | 12%        |
| Psychiatric                              | 44%     | 40%  | 39%                 | 33%                  | 53%               | 47%                     | 15%                | 35%        | 33%            | 35%            | 32%    | 35%         | 35%        |
| Renal                                    | 8%      | 5%   | 30%                 | 22%                  | 33%               | 13%                     | 30%                | 12%        | 40%            | 14%            | 9%     | 16%         | 18%        |
| Respiratory                              | 38%     | 44%  | 45%                 | 56%                  | 43%               | 42%                     | 33%                | 36%        | 33%            | 38%            | 36%    | 37%         | 38%        |
| Mean number of comorbidities per patient | 3.7     | 4.1  | 5.7                 | 6.0                  | 5.7               | 3.9                     | 4.0                | 4.1        | 5.6            | 4.3            | 3.8    | 4.2         | 4.1        |



**Table S4: Healing rates in the study period.**

|                                                        | Abscess | Burn | Diabetic foot ulcer | Leg ulcer (arterial) | Leg ulcer (mixed) | Leg ulcer (unspecified) | Leg ulcer (venous) | Open wound | Pressure ulcer | Surgical wound | Trauma | Unspecified | All wounds |
|--------------------------------------------------------|---------|------|---------------------|----------------------|-------------------|-------------------------|--------------------|------------|----------------|----------------|--------|-------------|------------|
| Wounds that healed in the study period                 | 86%     | 84%  | 52%                 | 47%                  | 30%               | 55%                     | 37%                | 90%        | 60%            | 85%            | 94%    | 85%         | 70%        |
| New wounds that healed in the study period             | 85%     | 80%  | 60%                 | 40%                  | 27%               | 38%                     | 56%                | 90%        | 75%            | 86%            | 94%    | 88%         | 76%        |
| Existing wounds that healed in the study period        | 89%     | 96%  | 40%                 | 50%                  | 33%               | 92%                     | 9%                 | 90%        | 0%             | 80%            | 96%    | 73%         | 56%        |
| Wounds that healed with no evidence of infection       | 92%     | 85%  | 57%                 | 50%                  | 34%               | 60%                     | 50%                | 93%        | 62%            | 87%            | 95%    | 86%         | 77%        |
| Wounds that healed with recorded evidence of infection | 69%     | 75%  | 50%                 | 45%                  | 25%               | 52%                     | 18%                | 89%        | 50%            | 81%            | 91%    | 38%         | 60%        |
| Wounds that healed among smokers                       | 84%     | 87%  | 33%                 | 37%                  | 28%               | 48%                     | 25%                | 88%        | 33%            | 82%            | 96%    | 85%         | 64%        |
| Wounds that healed among ex-smokers                    | 90%     | 75%  | 53%                 | 47%                  | 32%               | 53%                     | 39%                | 88%        | 67%            | 83%            | 95%    | 88%         | 70%        |
| Wounds that healed among non-smokers                   | 87%     | 87%  | 56%                 | 50%                  | 30%               | 58%                     | 38%                | 93%        | 75%            | 88%            | 96%    | 84%         | 74%        |

**Table S5: Percentage of patients who utilised resources in the study year.** †Includes tissue viability nurses and diabetic nurse specialists.

|                                                         | Abscess | Burn | Diabetic foot ulcer | Leg ulcer (arterial) | Leg ulcer (mixed) | Leg ulcer (unspecified) | Leg ulcer (venous) | Open wound | Pressure ulcer | Surgical wound | Trauma | Unspecified | All wounds |
|---------------------------------------------------------|---------|------|---------------------|----------------------|-------------------|-------------------------|--------------------|------------|----------------|----------------|--------|-------------|------------|
| District/community nurse visits                         | 37%     | 52%  | 96%                 | 89%                  | 93%               | 82%                     | 85%                | 24%        | 60%            | 46%            | 15%    | 44%         | 38%        |
| Healthcare assistant visits                             | 32%     | 27%  | 93%                 | 89%                  | 99%               | 84%                     | 81%                | 21%        | 40%            | 46%            | 15%    | 44%         | 36%        |
| Practice nurse visits                                   | 96%     | 94%  | 94%                 | 100%                 | 100%              | 79%                     | 96%                | 97%        | 93%            | 97%            | 98%    | 98%         | 97%        |
| GP office visits                                        | 94%     | 79%  | 97%                 | 100%                 | 100%              | 100%                    | 100%               | 90%        | 93%            | 82%            | 93%    | 62%         | 84%        |
| Dressings                                               | 100%    | 100% | 100%                | 100%                 | 100%              | 100%                    | 100%               | 100%       | 100%           | 100%           | 100%   | 100%        | 100%       |
| Compression bandaging/hosiery                           | 2%      | 5%   | 15%                 | 0%                   | 100%              | 26%                     | 93%                | 5%         | 0%             | 3%             | 0%     | 6%          | 6%         |
| Prescribed analgesics/non-steroidal anti-inflammatories | 22%     | 19%  | 57%                 | 67%                  | 87%               | 32%                     | 81%                | 12%        | 53%            | 24%            | 10%    | 20%         | 21%        |
| Prescribed antibiotics                                  | 82%     | 42%  | 92%                 | 97%                  | 90%               | 84%                     | 81%                | 81%        | 67%            | 43%            | 37%    | 26%         | 50%        |
| Hospital outpatient visits with a nurse                 | 11%     | 32%  | 35%                 | 22%                  | 33%               | 16%                     | 37%                | 8%         | 0%             | 18%            | 5%     | 31%         | 17%        |
| Accident & emergency attendances                        | 16%     | 18%  | 23%                 | 22%                  | 27%               | 5%                      | 30%                | 8%         | 7%             | 8%             | 5%     | 4%          | 8%         |
| Hospital admissions without surgery                     | 7%      | 8%   | 4%                  | 0%                   | 3%                | 5%                      | 7%                 | 7%         | 13%            | 8%             | 5%     | 8%          | 7%         |
| Hospital outpatient visits with a physician/surgeon     | 4%      | 0%   | 15%                 | 22%                  | 7%                | 8%                      | 7%                 | 4%         | 20%            | 8%             | 7%     | 1%          | 5%         |
| GP home visits                                          | 2%      | 3%   | 2%                  | 0%                   | 10%               | 0%                      | 11%                | 1%         | 13%            | 2%             | 1%     | 1%          | 2%         |
| Diagnostic tests                                        | 1%      | 2%   | 3%                  | 0%                   | 10%               | 3%                      | 0%                 | 1%         | 0%             | 2%             | 1%     | 3%          | 2%         |
| Ambulance services                                      | 1%      | 0%   | 3%                  | 0%                   | 3%                | 0%                      | 4%                 | 0%         | 0%             | 1%             | 0%     | 1%          | 1%         |
| Hospital admissions with surgery                        | 2%      | 2%   | 2%                  | 0%                   | 0%                | 0%                      | 0%                 | 0%         | 0%             | 6%             | 1%     | 0%          | 2%         |
| Specialist nurse visits†                                | 0%      | 0%   | 3%                  | 0%                   | 10%               | 0%                      | 0%                 | 0%         | 7%             | 1%             | 0%     | 1%          | 1%         |
| Podiatrist visits                                       | 1%      | 0%   | 3%                  | 33%                  | 17%               | 0%                      | 0%                 | 1%         | 7%             | 1%             | <1%    | 0%          | 1%         |
| Day Cases                                               | 1%      | 0%   | 0%                  | 0%                   | 0%                | 0%                      | 0%                 | 0%         | 0%             | 1%             | 0%     | <1%         | <1%        |

**The RECORD statement – checklist of items, extended from the STROBE statement, that should be reported in observational studies using routinely collected health data.**

|                           | Item No. | STROBE items                                                                                                                                                                               | Location in manuscript where items are reported | RECORD items                                                                                                                                                                                                                                                                                                                                                                                                                                | Location in manuscript where items are reported |
|---------------------------|----------|--------------------------------------------------------------------------------------------------------------------------------------------------------------------------------------------|-------------------------------------------------|---------------------------------------------------------------------------------------------------------------------------------------------------------------------------------------------------------------------------------------------------------------------------------------------------------------------------------------------------------------------------------------------------------------------------------------------|-------------------------------------------------|
| <b>Title and abstract</b> |          |                                                                                                                                                                                            |                                                 |                                                                                                                                                                                                                                                                                                                                                                                                                                             |                                                 |
|                           | 1        | (a) Indicate the study's design with a commonly used term in the title or the abstract (b) Provide in the abstract an informative and balanced summary of what was done and what was found | Page 1                                          | RECORD 1.1: The type of data used should be specified in the title or abstract. When possible, the name of the databases used should be included.<br><br>RECORD 1.2: If applicable, the geographic region and timeframe within which the study took place should be reported in the title or abstract.<br><br>RECORD 1.3: If linkage between databases was conducted for the study, this should be clearly stated in the title or abstract. | Page 1<br><br>Page 1<br><br>N/A                 |
| <b>Introduction</b>       |          |                                                                                                                                                                                            |                                                 |                                                                                                                                                                                                                                                                                                                                                                                                                                             |                                                 |
| Background rationale      | 2        | Explain the scientific background and rationale for the investigation being reported                                                                                                       | Page 6                                          |                                                                                                                                                                                                                                                                                                                                                                                                                                             |                                                 |
| Objectives                | 3        | State specific objectives, including any prespecified hypotheses                                                                                                                           | Page 6                                          |                                                                                                                                                                                                                                                                                                                                                                                                                                             |                                                 |
| <b>Methods</b>            |          |                                                                                                                                                                                            |                                                 |                                                                                                                                                                                                                                                                                                                                                                                                                                             |                                                 |
| Study Design              | 4        | Present key elements of study design early in the paper                                                                                                                                    | Page 7                                          |                                                                                                                                                                                                                                                                                                                                                                                                                                             |                                                 |
| Setting                   | 5        | Describe the setting, locations, and relevant dates, including periods of recruitment, exposure, follow-up, and data collection                                                            | Pages 8 and 11                                  |                                                                                                                                                                                                                                                                                                                                                                                                                                             |                                                 |

|                                                                                                                                                                                                            |          |                                                                                                                                                                                                                                                                                                                                                                                                                                                                                                                                                                                                                                                                                                                        |                   |                                                                                                                                                                                                                                                                                                                                                                                                                                                                                                                                                                                                                                                                                                      |                                                                                                                                                                                                                                         |
|------------------------------------------------------------------------------------------------------------------------------------------------------------------------------------------------------------|----------|------------------------------------------------------------------------------------------------------------------------------------------------------------------------------------------------------------------------------------------------------------------------------------------------------------------------------------------------------------------------------------------------------------------------------------------------------------------------------------------------------------------------------------------------------------------------------------------------------------------------------------------------------------------------------------------------------------------------|-------------------|------------------------------------------------------------------------------------------------------------------------------------------------------------------------------------------------------------------------------------------------------------------------------------------------------------------------------------------------------------------------------------------------------------------------------------------------------------------------------------------------------------------------------------------------------------------------------------------------------------------------------------------------------------------------------------------------------|-----------------------------------------------------------------------------------------------------------------------------------------------------------------------------------------------------------------------------------------|
| <p>1<br/>2<br/>3<br/>4<br/>5<br/>6<br/>7<br/>8<br/>9<br/>10<br/>11<br/>12<br/>13<br/>14<br/>15<br/>16<br/>17<br/>18<br/>19<br/>20<br/>21<br/>22<br/>23<br/>24<br/>25<br/>26<br/>27</p> <p>Participants</p> | <p>6</p> | <p>(a) <i>Cohort study</i> - Give the eligibility criteria, and the sources and methods of selection of participants. Describe methods of follow-up<br/> <i>Case-control study</i> - Give the eligibility criteria, and the sources and methods of case ascertainment and control selection. Give the rationale for the choice of cases and controls<br/> <i>Cross-sectional study</i> - Give the eligibility criteria, and the sources and methods of selection of participants</p> <p>(b) <i>Cohort study</i> - For matched studies, give matching criteria and number of exposed and unexposed<br/> <i>Case-control study</i> - For matched studies, give matching criteria and the number of controls per case</p> | <p>Page 8</p>     | <p>RECORD 6.1: The methods of study population selection (such as codes or algorithms used to identify subjects) should be listed in detail. If this is not possible, an explanation should be provided.</p> <p>RECORD 6.2: Any validation studies of the codes or algorithms used to select the population should be referenced. If validation was conducted for this study and not published elsewhere, detailed methods and results should be provided.</p> <p>RECORD 6.3: If the study involved linkage of databases, consider use of a flow diagram or other graphical display to demonstrate the data linkage process, including the number of individuals with linked data at each stage.</p> | <p>2,095 Read codes were used (Supplementary Table S1).</p> <p>Read codes have been used to code symptoms in the NHS since 1985. IQVIA used these codes to identify the patient population independently of the Authors.</p> <p>N/A</p> |
| <p>28<br/>29<br/>30<br/>31<br/>32<br/>33<br/>34</p> <p>Variables</p>                                                                                                                                       | <p>7</p> | <p>Clearly define all outcomes, exposures, predictors, potential confounders, and effect modifiers. Give diagnostic criteria, if applicable.</p>                                                                                                                                                                                                                                                                                                                                                                                                                                                                                                                                                                       | <p>Pages 8-11</p> | <p>RECORD 7.1: A complete list of codes and algorithms used to classify exposures, outcomes, confounders, and effect modifiers should be provided. If these cannot be reported, an explanation should be provided.</p>                                                                                                                                                                                                                                                                                                                                                                                                                                                                               | <p>N/A</p>                                                                                                                                                                                                                              |
| <p>35<br/>36<br/>37<br/>38<br/>39<br/>40<br/>41<br/>42</p> <p>Data sources/<br/>measurement</p>                                                                                                            | <p>8</p> | <p>For each variable of interest, give sources of data and details of methods of assessment (measurement). Describe comparability of assessment methods if there is more than one group</p>                                                                                                                                                                                                                                                                                                                                                                                                                                                                                                                            | <p>Pages 8-11</p> |                                                                                                                                                                                                                                                                                                                                                                                                                                                                                                                                                                                                                                                                                                      |                                                                                                                                                                                                                                         |

|                                                                                                                                                    |                                  |    |                                                                                                                                                                                                                                                                                                                                                                                                                                                                                                                                                                      |                                                                                                           |                                                                                                                                                       |                                                   |
|----------------------------------------------------------------------------------------------------------------------------------------------------|----------------------------------|----|----------------------------------------------------------------------------------------------------------------------------------------------------------------------------------------------------------------------------------------------------------------------------------------------------------------------------------------------------------------------------------------------------------------------------------------------------------------------------------------------------------------------------------------------------------------------|-----------------------------------------------------------------------------------------------------------|-------------------------------------------------------------------------------------------------------------------------------------------------------|---------------------------------------------------|
| 1<br>2<br>3<br>4                                                                                                                                   | Bias                             | 9  | Describe any efforts to address potential sources of bias                                                                                                                                                                                                                                                                                                                                                                                                                                                                                                            | Pages 8-10                                                                                                |                                                                                                                                                       |                                                   |
| 5<br>6<br>7<br>8<br>9                                                                                                                              | Study size                       | 10 | Explain how the study size was arrived at                                                                                                                                                                                                                                                                                                                                                                                                                                                                                                                            | Pages 8-10                                                                                                |                                                                                                                                                       |                                                   |
| 10<br>11<br>12<br>13<br>14<br>15<br>16<br>17<br>18<br>19<br>20<br>21<br>22<br>23<br>24<br>25<br>26<br>27<br>28<br>29<br>30<br>31<br>32<br>33<br>34 | Quantitative variables           | 11 | Explain how quantitative variables were handled in the analyses. If applicable, describe which groupings were chosen, and why                                                                                                                                                                                                                                                                                                                                                                                                                                        | Pages 8-11                                                                                                |                                                                                                                                                       |                                                   |
| 35<br>36<br>37<br>38<br>39<br>40<br>41<br>42<br>43<br>44<br>45<br>46<br>47                                                                         | Statistical methods              | 12 | (a) Describe all statistical methods, including those used to control for confounding<br>(b) Describe any methods used to examine subgroups and interactions<br>(c) Explain how missing data were addressed<br>(d) <i>Cohort study</i> - If applicable, explain how loss to follow-up was addressed<br><i>Case-control study</i> - If applicable, explain how matching of cases and controls was addressed<br><i>Cross-sectional study</i> - If applicable, describe analytical methods taking account of sampling strategy<br>(e) Describe any sensitivity analyses | Pages 9-11<br><br>Pages 9-11<br><br>Page 9-11<br><br>N/A<br><br><br><br><br><br><br><br><br><br>Page10-11 |                                                                                                                                                       |                                                   |
|                                                                                                                                                    | Data access and cleaning methods |    | ..                                                                                                                                                                                                                                                                                                                                                                                                                                                                                                                                                                   |                                                                                                           | RECORD 12.1: Authors should describe the extent to which the investigators had access to the database population used to create the study population. | Authors did not have access to the THIN database. |

|                  |    |                                                                                                                                                                                                                                                                                                                                                 |                                           |                                                                                                                                                                                                                                                                                                                    |             |
|------------------|----|-------------------------------------------------------------------------------------------------------------------------------------------------------------------------------------------------------------------------------------------------------------------------------------------------------------------------------------------------|-------------------------------------------|--------------------------------------------------------------------------------------------------------------------------------------------------------------------------------------------------------------------------------------------------------------------------------------------------------------------|-------------|
|                  |    |                                                                                                                                                                                                                                                                                                                                                 |                                           | RECORD 12.2: Authors should provide information on the data cleaning methods used in the study.                                                                                                                                                                                                                    |             |
| Linkage          |    | ..                                                                                                                                                                                                                                                                                                                                              |                                           | RECORD 12.3: State whether the study included person-level, institutional-level, or other data linkage across two or more databases. The methods of linkage and methods of linkage quality evaluation should be provided.                                                                                          | Pages 8-11  |
| <b>Results</b>   |    |                                                                                                                                                                                                                                                                                                                                                 |                                           |                                                                                                                                                                                                                                                                                                                    |             |
| Participants     | 13 | (a) Report the numbers of individuals at each stage of the study ( <i>e.g.</i> , numbers potentially eligible, examined for eligibility, confirmed eligible, included in the study, completing follow-up, and analysed)<br>(b) Give reasons for non-participation at each stage.<br>(c) Consider use of a flow diagram                          | Page 12, 27                               | RECORD 13.1: Describe in detail the selection of the persons included in the study ( <i>i.e.</i> , study population selection) including filtering based on data quality, data availability and linkage. The selection of included persons can be described in the text and/or by means of the study flow diagram. | Pages 8-11. |
| Descriptive data | 14 | (a) Give characteristics of study participants ( <i>e.g.</i> , demographic, clinical, social) and information on exposures and potential confounders<br>(b) Indicate the number of participants with missing data for each variable of interest<br>(c) <i>Cohort study</i> - summarise follow-up time ( <i>e.g.</i> , average and total amount) | Pages 12-16<br><br>N/A<br><br>Pages 12-16 |                                                                                                                                                                                                                                                                                                                    |             |
| Outcome data     | 15 | <i>Cohort study</i> - Report numbers of outcome events or summary measures over time<br><i>Case-control study</i> - Report numbers in each exposure                                                                                                                                                                                             | Pages 12-16, 27-35                        |                                                                                                                                                                                                                                                                                                                    |             |

|                   |    |                                                                                                                                                                                                                                                                                                                                                                                                                 |                                          |                                                                                                                                                                                                                                                                                                          |     |
|-------------------|----|-----------------------------------------------------------------------------------------------------------------------------------------------------------------------------------------------------------------------------------------------------------------------------------------------------------------------------------------------------------------------------------------------------------------|------------------------------------------|----------------------------------------------------------------------------------------------------------------------------------------------------------------------------------------------------------------------------------------------------------------------------------------------------------|-----|
|                   |    | category, or summary measures of exposure<br><i>Cross-sectional study</i> - Report numbers of outcome events or summary measures                                                                                                                                                                                                                                                                                |                                          |                                                                                                                                                                                                                                                                                                          |     |
| Main results      | 16 | (a) Give unadjusted estimates and, if applicable, confounder-adjusted estimates and their precision (e.g., 95% confidence interval). Make clear which confounders were adjusted for and why they were included<br>(b) Report category boundaries when continuous variables were categorized<br>(c) If relevant, consider translating estimates of relative risk into absolute risk for a meaningful time period | Pages 12-16, 27-35<br><br>N/A<br><br>N/A |                                                                                                                                                                                                                                                                                                          |     |
| Other analyses    | 17 | Report other analyses done— e.g., analyses of subgroups and interactions, and sensitivity analyses                                                                                                                                                                                                                                                                                                              | Pages 12, 15, 16                         |                                                                                                                                                                                                                                                                                                          |     |
| <b>Discussion</b> |    |                                                                                                                                                                                                                                                                                                                                                                                                                 |                                          |                                                                                                                                                                                                                                                                                                          |     |
| Key results       | 18 | Summarise key results with reference to study objectives                                                                                                                                                                                                                                                                                                                                                        | Pages 17-22                              |                                                                                                                                                                                                                                                                                                          |     |
| Limitations       | 19 | Discuss limitations of the study, taking into account sources of potential bias or imprecision. Discuss both direction and magnitude of any potential bias                                                                                                                                                                                                                                                      | Pages 20-22                              | RECORD 19.1: Discuss the implications of using data that were not created or collected to answer the specific research question(s). Include discussion of misclassification bias, unmeasured confounding, missing data, and changing eligibility over time, as they pertain to the study being reported. | N/A |
| Interpretation    | 20 | Give a cautious overall interpretation of results considering objectives,                                                                                                                                                                                                                                                                                                                                       | Pages 17-22                              |                                                                                                                                                                                                                                                                                                          |     |



|                                                           |    |                                                                                                                                                               |             |                                                                                                                                                          |     |
|-----------------------------------------------------------|----|---------------------------------------------------------------------------------------------------------------------------------------------------------------|-------------|----------------------------------------------------------------------------------------------------------------------------------------------------------|-----|
|                                                           |    | limitations, multiplicity of analyses, results from similar studies, and other relevant evidence                                                              |             |                                                                                                                                                          |     |
| Generalisability                                          | 21 | Discuss the generalisability (external validity) of the study results                                                                                         | Pages 21-22 |                                                                                                                                                          |     |
| <b>Other Information</b>                                  |    |                                                                                                                                                               |             |                                                                                                                                                          |     |
| Funding                                                   | 22 | Give the source of funding and the role of the funders for the present study and, if applicable, for the original study on which the present article is based | Page 3      |                                                                                                                                                          |     |
| Accessibility of protocol, raw data, and programming code |    |                                                                                                                                                               |             | RECORD 22.1: Authors should provide information on how to access any supplemental information such as the study protocol, raw data, or programming code. | N/A |

\*Reference: Benchimol EI, Smeeth L, Guttman A, Harron K, Moher D, Petersen I, Sørensen HT, von Elm E, Langan SM, the RECORD Working Committee. The REporting of studies Conducted using Observational Routinely-collected health Data (RECORD) Statement. *PLoS Medicine* 2015; in press.

\*Checklist is protected under Creative Commons Attribution ([CC BY](https://creativecommons.org/licenses/by/4.0/)) license.
