# Supplementary material for: Cohort study evaluating the burden of wounds to the UK’s National Health Service in 2017/2018: update from 2012/2013
Source: PubMed Central journal article supplement — BMJ Open. 2020 Dec 22;10(12):e045253. doi: 10.1136/bmjopen-2020-045253 (PMC7757484; doi:10.1136/bmjopen-2020-045253), 2020-12-22
Supplement: bmjopen-2020-045253supp001.pdf [file bmjopen-2020-045253supp001.pdf]

| Read code | Description                                           |
|-----------|-------------------------------------------------------|
| 14F3.00   | H/O: chronic skin ulcer                               |
| 14F4.00   | H/O: Admission in last year for diabetes foot problem |
| 14F5.00   | H/O: venous leg ulcer                                 |
| 14F6.00   | H/O: foot ulcer                                       |
| 14F7.00   | H/O: arterial lower limb ulcer                        |
| 22L..00   | O/E - wound healing                                   |
| 22L1.00   | O/E - Wound healed                                    |
| 22L2.00   | O/E - Wound healing well                              |
| 22L3.00   | O/E - Wound healing badly                             |
| 22L3.11   | O/E wound healing delayed                             |
| 22L4.00   | O/E - Wound infected                                  |
| 22L5.00   | O/E - protruding suture                               |
| 22L6.00   | O/E - wound necrotic                                  |
| 22Q..00   | Wound observation                                     |
| 22Q0.00   | Length of wound                                       |
| 22Q1.00   | Width of wound                                        |
| 22Q3.00   | Wound dirty                                           |
| 22Q4.00   | Depth of wound                                        |
| 22Q6.00   | Wound discharge                                       |
| 22Q8.00   | Critical colonisation of wound                        |
| 22Q9.00   | Traumatic wound                                       |
| 22QA.00   | Surgical wound                                        |
| 22QB.00   | Fungating wound                                       |
| 26B8.00   | O/E - ulcerated breast lesion                         |
| 26B8.11   | O/E - ulcer on breast                                 |
| 2924.00   | O/E - trophic skin ulceration                         |
| 2Fb..00   | Granulation of tissue                                 |
| 2FF..00   | O/E - skin ulcer                                      |
| 2FF1.00   | O/E - no skin ulcer                                   |
| 2FF2.00   | O/E - skin ulcer present                              |
| 2FF3.00   | O/E - depth of ulcer                                  |
| 2FFZ.00   | O/E - skin ulcer NOS                                  |
| 2FG7.00   | O/E - healed burn scar                                |
| 2Fi..00   | O/E - sinus in skin                                   |
| 2Fi2.00   | O/E -skin sinus-post operation                        |
| 2Fi3.00   | O/E - skin sinus -after injury                        |
| 2Fi4.00   | O/E - suppuration skin sinus                          |
| 2FiZ.00   | O/E - skin sinus NOS                                  |
| 2G48.00   | O/E - ankle ulcer                                     |
| 2G4E.00   | Healed leg ulcer                                      |
| 2G54.00   | O/E - Right foot ulcer                                |
| 2G55.00   | O/E - Left foot ulcer                                 |
| 2G5H.00   | O/E - Right diabetic foot - ulcerated                 |
| 2G5L.00   | O/E - Left diabetic foot - ulcerated                  |
| 2G5Q.00   | O/E - No left foot ulcer                              |
| 2G5R.00   | O/E - No right foot ulcer                             |
| 2G5S.00   | O/E - right healed foot ulcer                         |
| 2G5T.00   | O/E - left healed foot ulcer                          |
| 2G5V.00   | O/E - right chronic diabetic foot ulcer               |

|         |                                                              |
|---------|--------------------------------------------------------------|
| 2G5W.00 | O/E - left chronic diabetic foot ulcer                       |
| 2G63.00 | Ischaemic toe                                                |
| 2G64.00 | O/E - infected toe                                           |
| 2I16.00 | O/E - gangrene                                               |
| 3511.00 | Surgical biopsy taken                                        |
| 38C4.00 | Leg ulcer assessment                                         |
| 38N..00 | Wound assessment                                             |
| 38Qi.00 | SINBAD (site,isch,neuro,bact inf,depth) wound classification |
| 39C0.00 | Pressure sore                                                |
| 39C1.00 | Superficial pressure sore                                    |
| 39C2.00 | Deep pressure sore                                           |
| 39C3.00 | Pressure sore -deep + superfic                               |
| 39C4.00 | Waterlow pressure sore risk score                            |
| 39C4200 | Waterlow major surgery/trauma score                          |
| 39C5.00 | Medley pressure sore risk score                              |
| 39C6.00 | Maelor pressure ulcer risk assessment score                  |
| 39C6.11 | Maelor score                                                 |
| 39C7.00 | EPUAP (European pressure ulcer advisory panel) grade 1 ulcer |
| 39C8.00 | EPUAP (European pressure ulcer advisory panel) grade 2 ulcer |
| 39C9.00 | EPUAP (European pressure ulcer advisory panel) grade 3 ulcer |
| 39CA.00 | EPUAP (European pressure ulcer advisory panel) grade 4 ulcer |
| 4I1F.00 | Wound microscopy, culture and sensitivities                  |
| 4I2D.00 | Wound exudate sample                                         |
| 4I2D.11 | Wound swab                                                   |
| 4I2D000 | Wound swab culture positive                                  |
| 4I2D100 | Wound swab culture negative                                  |
| 4JG3.00 | Skin ulcer swab taken                                        |
| 4JG4.00 | Skin wound swab taken                                        |
| 58C4.00 | Photography of wound                                         |
| 6AD1.00 | Wound repair review                                          |
| 7G06.11 | Curettage of lesion of skin or subcutaneous tissue           |
| 7G06.12 | Curettage of lesion of skin including head and neck          |
| 7G06000 | Curettage and cauterisation of lesion of skin head or neck   |
| 7G06100 | Curettage and cauterisation of lesion of skin NEC            |
| 7G06111 | Curettage and cauterisation of skin wart NEC                 |
| 7G06200 | Curettage of lesion of skin of head or neck NEC              |
| 7G06300 | Curettage of sinus NEC                                       |
| 7G06400 | Curettage of wound NEC                                       |
| 7G06y00 | Other specified curettage of lesion of skin                  |
| 7G06z00 | Curettage of lesion of skin NOS                              |
| 7G2C000 | Toilet or clean burnt skin of head or neck                   |
| 7G2C100 | Toilet or clean burnt skin NEC                               |
| 7G2C200 | Debridement of burnt skin of head and neck                   |
| 7G2C300 | Debridement of burnt skin NEC                                |
| 7G2C400 | Toilet to burnt skin of head or neck NEC                     |
| 7G2C500 | Tangent excision of burnt skin of head or neck               |
| 7G2C600 | Tangent excision of burnt skin NEC                           |
| 7G2CE00 | Removal of slough from burnt skin NEC                        |
| 7G2CE11 | Escharotomy of burnt skin NEC                                |
| 7G2CF00 | Cleansing and sterilisation of burnt skin of head or neck    |

|         |                                                              |
|---------|--------------------------------------------------------------|
| 7G2CG00 | Dress burnt skin head or neck us vacuum assisted clos device |
| 7G2CH00 | Cleansing and sterilisation of burnt skin NEC                |
| 7G2CJ00 | Dressing burnt skin using vacuum assisted closure device NEC |
| 7G2Cy00 | Other specified toilet to burnt skin                         |
| 7G2Cz00 | Toilet to burnt skin NOS                                     |
| 7G2D.00 | Other skin toilet                                            |
| 7G2D000 | Debridement of skin NEC                                      |
| 7G2D011 | Debridement of wound of skin NEC                             |
| 7G2D100 | Debridement of skin of head or neck NEC                      |
| 7G2D200 | Removal of slough from skin NEC                              |
| 7G2D300 | Removal of slough from skin of head or neck NEC              |
| 7G2D400 | Toilet to skin of head or neck NEC                           |
| 7G2D500 | Cleaning of skin wound NEC                                   |
| 7G2D600 | Cleaning of skin wound of head or neck                       |
| 7G2D700 | Cleansing and sterilisation of skin of head or neck NEC      |
| 7G2D800 | Cleansing and sterilisation of skin NEC                      |
| 7G2D900 | Dres skin head or neck us vacuum assisted closure device NEC |
| 7G2DA00 | Dressing of skin using vacuum assisted closure device NEC    |
| 7G2DB00 | Removal of slough from skin using pressurised fluid jet      |
| 7G2Dy00 | Other specified toilet to skin                               |
| 7G2Dz00 | Other toilet to skin NOS                                     |
| 7G2E.00 | Dressing of skin or wound                                    |
| 7G2E.11 | Dressing of skin                                             |
| 7G2E000 | Dressing of burnt skin of head or neck                       |
| 7G2E100 | Dressing of burnt skin NEC                                   |
| 7G2E200 | Dressing of skin of head or neck NEC                         |
| 7G2E300 | Dressing of skin NEC                                         |
| 7G2E400 | Dressing of skin of head or neck NEC                         |
| 7G2E500 | Dressing of skin ulcer NEC                                   |
| 7G2E600 | Attention to dressing of burn of head or neck                |
| 7G2E700 | Attention to dressing of burnt skin NEC                      |
| 7G2E800 | Attention to dressing of skin of head or neck NEC            |
| 7G2E900 | Attention to dressing of skin NEC                            |
| 7G2EA00 | Two layer compression bandage for skin ulcer                 |
| 7G2EB00 | Four layer compression bandaging for skin ulcer              |
| 7G2EC00 | Three layer compression bandage for skin ulcer               |
| 7G2Ey00 | Other specified dressing of skin                             |
| 7G2Ez00 | Dressing of skin NOS                                         |
| 7G2G000 | Derabrasion of skin of head or neck                          |
| 7G2G100 | Derabrasion of skin NEC                                      |
| 7G2G400 | Refashioning of scar                                         |
| 7P23200 | Delivery of rehabilitation for burns                         |
| 81H..00 | Dressing of wound                                            |
| 81H1.00 | Dressing of ulcer                                            |
| 81H2.00 | Dressing of burn                                             |
| 81H3.00 | Attention to dressing of skin                                |
| 81H4.00 | Checking dressing of skin                                    |
| 81H5.00 | Change of dressing                                           |
| 81Hy.00 | Other wound dressing                                         |
| 81HZ.00 | Wound dressing NOS                                           |

|         |                                                             |
|---------|-------------------------------------------------------------|
| 8343.00 | Immobilisation of wound                                     |
| 8BC7.00 | Glueing of wound                                            |
| 8BN..00 | Treatment of wound with maggots                             |
| 8C1L.00 | Wound care                                                  |
| 8C1M.00 | Post-operative wound care                                   |
| 8C1M.11 | Post-surgical wound care                                    |
| 8C1Q.00 | Compression hosiery procedure                               |
| 8C22.00 | Oxygenation of slough                                       |
| 8C6..00 | Wound dressing requested by accident and emergency service  |
| 8C7..00 | Suture removal requested by accident and emergency service  |
| 8CA4T00 | Dietary education for wound healing                         |
| 8CA4T11 | Dietary advice for wound healing                            |
| 8Cd9.00 | Advice given about wound care                               |
| 8CK..00 | Skin care                                                   |
| 8CMT.00 | Leg ulcer care pathway                                      |
| 8CS3.00 | Agreeing on leg ulcer treatment plan                        |
| 8CT1.00 | Leg ulcer compression therapy finished                      |
| 8CV2.00 | Leg ulcer compression therapy started                       |
| 8H15.00 | Admit to burns unit                                         |
| 8H5E.00 | Burns referral                                              |
| 8HIV.00 | Referral for complex wound care                             |
| 8HTh.00 | Referral to leg ulcer clinic                                |
| 9kd..00 | Complex wound care - enhanced services administration       |
| 9ks..00 | Complex skin ulcer care enhanced services administration    |
| 9kY..00 | Review of wound repair - enhanced services administration   |
| 9kY..11 | Review of wound repair                                      |
| 9N0t.00 | Seen in primary care leg ulcer clinic                       |
| 9N0z.00 | Seen in burns clinic                                        |
| 9N2m.00 | Seen by tissue viability nurse specialist                   |
| 9N7L.00 | Postop wound management gen secondary care done by practice |
| 9NM5.00 | Attending leg ulcer clinic                                  |
| A056.00 | Amoebic skin ulceration                                     |
| A170.00 | Tuberculosis of skin and subcutaneous tissue                |
| A170z00 | Tuberculosis of skin and subcutaneous tissue NOS            |
| A3A0500 | Gas gangrene                                                |
| A3A0600 | Gas gangrene-neck                                           |
| A3A0700 | Gas gangrene-back                                           |
| A3A0800 | Gas gangrene-shoulder                                       |
| A3A0900 | Gas gangrene-arm                                            |
| A3A0A00 | Gas gangrene-forearm                                        |
| A3A0B00 | Gas gangrene-hand                                           |
| A3A0C00 | Gas gangrene-pelvis                                         |
| A3A0D00 | Gas gangrene-thigh                                          |
| A3A0E00 | Gas gangrene-leg                                            |
| A3A0F00 | Gas gangrene-foot                                           |
| A3A0z00 | Gas gangrene caused by organism NOS                         |
| A851000 | Aleppo boil                                                 |
| A851100 | Baghdad boil                                                |
| A851200 | Delhi boil                                                  |
| A851z00 | Urban cutaneous leishmaniasis NOS                           |

|         |                                                       |
|---------|-------------------------------------------------------|
| A852.00 | Asian desert cutaneous leishmaniasis                  |
| A853.00 | Ethiopian cutaneous leishmaniasis                     |
| A854.00 | American cutaneous leishmaniasis                      |
| A854.11 | Chiclero ulcer                                        |
| A855.00 | American mucocutaneous leishmaniasis                  |
| A85z.00 | Leishmaniasis NOS                                     |
| A86..00 | Trypanosomiasis                                       |
| AD40000 | Cutaneous myiasis                                     |
| AD40100 | Wound myiasis                                         |
| C107.11 | Diabetes mellitus with gangrene                       |
| C107.12 | Diabetes with gangrene                                |
| C107200 | Diabetes mellitus, adult with gangrene                |
| C108500 | Insulin dependent diabetes mellitus with ulcer        |
| C108511 | Type I diabetes mellitus with ulcer                   |
| C108512 | Type 1 diabetes mellitus with ulcer                   |
| C108600 | Insulin dependent diabetes mellitus with gangrene     |
| C108611 | Type I diabetes mellitus with gangrene                |
| C108612 | Type 1 diabetes mellitus with gangrene                |
| C109400 | Non-insulin dependent diabetes mellitus with ulcer    |
| C109411 | Type II diabetes mellitus with ulcer                  |
| C109412 | Type 2 diabetes mellitus with ulcer                   |
| C109500 | Non-insulin dependent diabetes mellitus with gangrene |
| C109511 | Type II diabetes mellitus with gangrene               |
| C109512 | Type 2 diabetes mellitus with gangrene                |
| C10E500 | Type 1 diabetes mellitus with ulcer                   |
| C10E511 | Type I diabetes mellitus with ulcer                   |
| C10E512 | Insulin dependent diabetes mellitus with ulcer        |
| C10E600 | Type 1 diabetes mellitus with gangrene                |
| C10E611 | Type I diabetes mellitus with gangrene                |
| C10E612 | Insulin dependent diabetes mellitus with gangrene     |
| C10F400 | Type 2 diabetes mellitus with ulcer                   |
| C10F411 | Type II diabetes mellitus with ulcer                  |
| C10F500 | Type 2 diabetes mellitus with gangrene                |
| C10F511 | Type II diabetes mellitus with gangrene               |
| F506.00 | Abscess of external ear                               |
| G732.00 | Peripheral gangrene                                   |
| G732000 | Gangrene of toe                                       |
| G732100 | Gangrene of foot                                      |
| G732200 | Gangrene of finger                                    |
| G732300 | Gangrene of thumb                                     |
| G732400 | Gangrene of hand                                      |
| G830.00 | Varicose veins of the leg with ulcer                  |
| G832.00 | Varicose veins of the leg with ulcer and eczema       |
| G835.00 | Infected varicose ulcer                               |
| G837.00 | Venous ulcer of leg                                   |
| J085000 | Abscess of lip                                        |
| J085800 | Lip ulcer                                             |
| J54..00 | Abscess of anal and rectal regions                    |
| J54..12 | Rectal abscess                                        |
| J540.00 | Perianal abscess                                      |

|         |                                                              |
|---------|--------------------------------------------------------------|
| J540.11 | Perianal cellulitis                                          |
| J541.00 | Ischiorectal abscess                                         |
| J542.00 | Submucous ano-rectal abscess                                 |
| J543.00 | Pelvi-rectal abscess                                         |
| J544.00 | Ano-rectal fissure abscess                                   |
| J545.00 | Intrasphincteric abscess                                     |
| J546.00 | Rectal abscess                                               |
| J54z.00 | Ano-rectal abscess NOS                                       |
| K272000 | Penile abscess                                               |
| K272100 | Penile boil                                                  |
| K272200 | Penile carbuncle                                             |
| K272300 | Cellulitis of penis                                          |
| K27y500 | Chronic ulcer of penis                                       |
| K284600 | Fournier's gangrene of scrotum                               |
| K424000 | Abscess of vulva                                             |
| K424011 | Abscess of labia                                             |
| K424100 | Carbuncle of vulva                                           |
| K424111 | Boil of vulva                                                |
| K424200 | Furuncle of vulva                                            |
| K424z00 | Other abscess of vulva NOS                                   |
| K425.00 | Ulceration of vulva                                          |
| K425000 | Ulceration of vulva unspecified                              |
| K425100 | Ulceration of vulva in diseases EC                           |
| K425200 | Ulceration of vulva in Behcet's disease                      |
| K425z00 | Ulceration of vulva NOS                                      |
| L394500 | Infection of obstetric surgical wound                        |
| L441.00 | Caesarean wound disruption                                   |
| L441000 | Caesarean wound disruption unspecified                       |
| L441100 | Caesarean wound disruption - delivered with p/n complication |
| L441200 | Caesarean wound disruption with postnatal complication       |
| L441z00 | Caesarean wound disruption NOS                               |
| L442.00 | Obstetric perineal wound disruption                          |
| L442.11 | Breakdown of perineum                                        |
| L442.12 | Episiotomy breakdown                                         |
| L442000 | Obstetric perineal wound disruption unspecified              |
| L442100 | Obstetric perineal wound disruption - deliv + p/n comp       |
| L442200 | Obstetric perineal wound disruption with p/n complication    |
| L442z00 | Obstetric perineal wound disruption NOS                      |
| L443.00 | Other complication of obstetric surgical wound               |
| L443.11 | Haematoma - perineal wound                                   |
| L443.12 | Infection - perineal wound                                   |
| L443000 | Other complication of obstetric surgical wound unspecified   |
| L443100 | Other complication obstetric surg wound -delivered +p/n comp |
| L443200 | Other complication obstetric surgical wound with p/n comp    |
| L443z00 | Other complication of obstetric surgical wound NOS           |
| L45..00 | Obstetric breast infections                                  |
| L450.00 | Obstetric nipple infection                                   |
| L450.11 | Abscess of nipple - obstetric                                |
| L450.12 | Nipple infection - obstetric                                 |
| L450000 | Obstetric nipple infection unspecified                       |

|         |                                                              |
|---------|--------------------------------------------------------------|
| L450100 | Obstetric nipple infection - delivered                       |
| L450200 | Obstetric nipple infection - delivered with p/n complication |
| L450300 | Obstetric nipple infection with antenatal complication       |
| L450400 | Obstetric nipple infection with postnatal complication       |
| L450z00 | Obstetric nipple infection NOS                               |
| L451.00 | Obstetric breast abscess                                     |
| L451.11 | Purulent mastitis - obstetric                                |
| L451000 | Obstetric breast abscess unspecified                         |
| L451100 | Obstetric breast abscess - delivered                         |
| L451200 | Obstetric breast abscess - deliv with postnatal complication |
| L451300 | Obstetric breast abscess with antenatal complication         |
| L451400 | Obstetric breast abscess with postnatal complication         |
| L451z00 | Obstetric breast abscess NOS                                 |
| Lyu6A00 | [X]Infection of caesarean section wound following delivery   |
| M...00  | Skin and subcutaneous tissue diseases                        |
| M0...00 | Skin and subcutaneous tissue infections                      |
| M00..00 | Carbuncle                                                    |
| M000.00 | Carbuncle of face                                            |
| M000000 | Carbuncle of ear                                             |
| M000100 | Carbuncle of face (excluding eye)                            |
| M000200 | Carbuncle of nasal septum                                    |
| M000300 | Carbuncle of temple region                                   |
| M000z00 | Carbuncle of face NOS                                        |
| M001.00 | Carbuncle of neck                                            |
| M002.00 | Carbuncle of trunk                                           |
| M002000 | Carbuncle of chest wall                                      |
| M002100 | Carbuncle of breast                                          |
| M002200 | Carbuncle of back                                            |
| M002300 | Carbuncle of abdominal wall                                  |
| M002400 | Carbuncle of umbilicus                                       |
| M002500 | Carbuncle of flank                                           |
| M002600 | Carbuncle of groin                                           |
| M002700 | Carbuncle of perineum                                        |
| M002z00 | Carbuncle of trunk NOS                                       |
| M003.00 | Carbuncle of upper arm and forearm                           |
| M003000 | Carbuncle of shoulder                                        |
| M003100 | Carbuncle of axilla                                          |
| M003200 | Carbuncle of upper arm                                       |
| M003300 | Carbuncle of elbow                                           |
| M003400 | Carbuncle of forearm                                         |
| M003z00 | Carbuncle of upper arm and forearm NOS                       |
| M004.00 | Carbuncle of hand                                            |
| M004000 | Carbuncle of wrist                                           |
| M004100 | Carbuncle of thumb                                           |
| M004200 | Carbuncle of finger                                          |
| M004z00 | Carbuncle of hand NOS                                        |
| M005.00 | Carbuncle of buttock                                         |
| M005000 | Carbuncle of anus                                            |
| M005100 | Carbuncle of gluteal region                                  |
| M005z00 | Carbuncle of buttock NOS                                     |

|         |                                       |
|---------|---------------------------------------|
| M006.00 | Carbuncle of leg (excluding foot)     |
| M006000 | Carbuncle of hip                      |
| M006100 | Carbuncle of thigh                    |
| M006200 | Carbuncle of knee                     |
| M006300 | Carbuncle of lower leg                |
| M006400 | Carbuncle of ankle                    |
| M006z00 | Carbuncle of leg (excluding foot) NOS |
| M007.00 | Carbuncle of foot                     |
| M007000 | Carbuncle of foot unspecified         |
| M007100 | Carbuncle of heel                     |
| M007200 | Carbuncle of toe                      |
| M007z00 | Carbuncle of foot NOS                 |
| M00y.00 | Carbuncle of other specified site     |
| M00y000 | Carbuncle of head (excluding face)    |
| M00yz00 | Carbuncle of other specified site NOS |
| M00z.00 | Carbuncle NOS                         |
| M01..00 | Furuncle - boil                       |
| M010.00 | Boil of face                          |
| M010000 | Boil of ear                           |
| M010100 | Boil of face (excluding eye)          |
| M010200 | Boil of nasal septum                  |
| M010300 | Boil of temple region                 |
| M010400 | Boil of external nose                 |
| M010z00 | Boil of face NOS                      |
| M011.00 | Boil of neck                          |
| M012.00 | Boil of trunk                         |
| M012000 | Boil of chest wall                    |
| M012100 | Boil of breast                        |
| M012200 | Boil of back                          |
| M012300 | Boil of abdominal wall                |
| M012400 | Boil of umbilicus                     |
| M012500 | Boil of flank                         |
| M012600 | Boil of groin                         |
| M012700 | Boil of perineum                      |
| M012z00 | Boil of trunk NOS                     |
| M013.00 | Boil of upper arm and forearm         |
| M013000 | Boil of shoulder                      |
| M013100 | Boil of axilla                        |
| M013200 | Boil of upper arm                     |
| M013300 | Boil of elbow                         |
| M013400 | Boil of forearm                       |
| M013z00 | Boil of upper arm and forearm NOS     |
| M014.00 | Boil of hand                          |
| M014000 | Boil of wrist                         |
| M014100 | Boil of thumb                         |
| M014200 | Boil of finger                        |
| M014z00 | Boil of hand NOS                      |
| M015.00 | Boil of buttock                       |
| M015000 | Boil of anus                          |
| M015100 | Boil of gluteal region                |



|         |                                                             |
|---------|-------------------------------------------------------------|
| M015z00 | Boil of buttock NOS                                         |
| M016.00 | Boil of leg (excluding foot)                                |
| M016000 | Boil of hip                                                 |
| M016100 | Boil of thigh                                               |
| M016200 | Boil of knee                                                |
| M016300 | Boil of lower leg                                           |
| M016400 | Boil of ankle                                               |
| M016z00 | Boil of leg (excluding foot) NOS                            |
| M017.00 | Boil of foot                                                |
| M017000 | Boil of foot unspecified                                    |
| M017100 | Boil of heel                                                |
| M017200 | Boil of toe                                                 |
| M017z00 | Boil of foot NOS                                            |
| M01y.00 | Boil of other specified site                                |
| M01y000 | Boil of head (excluding face)                               |
| M01yz00 | Boil of other specified site NOS                            |
| M01z.00 | Boil NOS                                                    |
| M01z.11 | Recurrent boils                                             |
| M01z.12 | Boils of multiple sites                                     |
| M01z000 | Multiple boils                                              |
| M02..00 | Cellulitis and abscess of finger and toe                    |
| M020.00 | Cellulitis and abscess of finger                            |
| M020000 | Cellulitis and abscess of finger unspecified                |
| M020100 | Finger pulp abscess                                         |
| M020111 | Felon                                                       |
| M020112 | Whitlow                                                     |
| M020200 | Onychia of finger                                           |
| M020300 | Paronychia of finger                                        |
| M020311 | Perionychia of finger                                       |
| M020400 | Finger web space infection                                  |
| M020500 | Pulp space infection of finger/thumb                        |
| M020z00 | Cellulitis and abscess of finger NOS                        |
| M021.00 | Cellulitis and abscess of toe                               |
| M021000 | Cellulitis and abscess of toe unspecified                   |
| M021100 | Onychia of toe                                              |
| M021200 | Paronychia of toe                                           |
| M021300 | Pulp space infection of toe                                 |
| M021z00 | Cellulitis and abscess of toe NOS                           |
| M021z11 | Perionychia of toe                                          |
| M02z.00 | Cellulitis and abscess of digit NOS                         |
| M02z.11 | Nail infection NOS                                          |
| M02z.12 | Paronychia                                                  |
| M02z.13 | Infected nailfold                                           |
| M02z.14 | Nailfold infected                                           |
| M03..00 | Other cellulitis and abscess                                |
| M03..11 | Abscess of skin area excluding digits of hand or foot       |
| M03..12 | Acute lymphangitis of skin excluding digits of hand or foot |
| M03..13 | Cellulitis of skin area excluding digits of hand or foot    |
| M030.00 | Cellulitis and abscess of face                              |
| M030000 | Cellulitis and abscess of cheek (external)                  |

|         |                                                 |
|---------|-------------------------------------------------|
| M030011 | Cellulitis and abscess of cheek                 |
| M030100 | Cellulitis and abscess of nose (external)       |
| M030111 | Cellulitis and abscess of nose                  |
| M030200 | Cellulitis and abscess of chin                  |
| M030300 | Cellulitis and abscess of submandibular region  |
| M030400 | Cellulitis and abscess of forehead              |
| M030500 | Cellulitis and abscess of temple region         |
| M030600 | Cellulitis of face                              |
| M030z00 | Cellulitis and abscess of face NOS              |
| M031.00 | Cellulitis and abscess of neck                  |
| M031.11 | Cervical abscess                                |
| M032.00 | Cellulitis and abscess of trunk                 |
| M032000 | Cellulitis and abscess of chest wall            |
| M032100 | Cellulitis and abscess of breast                |
| M032200 | Cellulitis and abscess of back                  |
| M032300 | Cellulitis and abscess of abdominal wall        |
| M032400 | Cellulitis and abscess of umbilicus             |
| M032500 | Cellulitis and abscess of flank                 |
| M032600 | Cellulitis and abscess of groin                 |
| M032700 | Cellulitis and abscess of perineum              |
| M032800 | Cellulitis of trunk                             |
| M032z00 | Cellulitis and abscess of trunk NOS             |
| M033.00 | Cellulitis and abscess of arm                   |
| M033000 | Cellulitis and abscess of shoulder              |
| M033100 | Cellulitis and abscess of axilla                |
| M033200 | Cellulitis and abscess of upper arm             |
| M033300 | Cellulitis and abscess of elbow                 |
| M033400 | Cellulitis and abscess of forearm               |
| M033z00 | Cellulitis and abscess of arm NOS               |
| M034.00 | Cellulitis and abscess of hand excluding digits |
| M034.11 | Cellulitis and abscess of hand                  |
| M034000 | Cellulitis and abscess of hand unspecified      |
| M034011 | Abscess of dorsum of hand                       |
| M034012 | Abscess of palm of hand                         |
| M034013 | Cellulitis of dorsum of hand                    |
| M034014 | Cellulitis of palm of hand                      |
| M034100 | Cellulitis and abscess of wrist                 |
| M034z00 | Cellulitis and abscess of hand NOS              |
| M035.00 | Cellulitis and abscess of buttock               |
| M036.00 | Cellulitis and abscess of leg excluding foot    |
| M036.11 | Cellulitis and abscess of leg                   |
| M036000 | Cellulitis and abscess of hip                   |
| M036100 | Cellulitis and abscess of thigh                 |
| M036200 | Cellulitis and abscess of knee                  |
| M036300 | Cellulitis and abscess of lower leg             |
| M036400 | Cellulitis and abscess of ankle                 |
| M036z00 | Cellulitis and abscess of leg NOS               |
| M037.00 | Cellulitis and abscess of foot excluding toe    |
| M037.11 | Cellulitis and abscess of foot                  |
| M037000 | Cellulitis and abscess of foot unspecified      |

|         |                                                            |
|---------|------------------------------------------------------------|
| M037100 | Cellulitis and abscess of heel                             |
| M037200 | Cellulitis in diabetic foot                                |
| M037z00 | Cellulitis and abscess of foot NOS                         |
| M038.00 | Cellulitis of external ear                                 |
| M03y.00 | Other specified cellulitis and abscess                     |
| M03y000 | Cellulitis and abscess of head unspecified                 |
| M03y011 | Abscess of scalp                                           |
| M03z.00 | Cellulitis and abscess NOS                                 |
| M03z000 | Cellulitis NOS                                             |
| M03z100 | Abscess NOS                                                |
| M03zz00 | Cellulitis and abscess NOS                                 |
| M060.00 | Pilonidal cyst with abscess                                |
| M061.00 | Pilonidal cyst with no abscess                             |
| M061.11 | Dermal sinus                                               |
| M062.00 | Pilonidal sinus with abscess                               |
| M063.00 | Pilonidal sinus without abscess                            |
| M06z.00 | Pilonidal sinus/cyst NOS                                   |
| M07..00 | Other local infections of skin and subcutaneous tissue     |
| M070200 | Pyoderma gangrenosum                                       |
| M070300 | Pyoderma ulcerosum tropicalum                              |
| M07y.00 | Local infection of skin or subcutaneous tissue OS          |
| M07yz00 | Other spec local skin/subc infection NOS                   |
| M07yz11 | Infection toe                                              |
| M07yz12 | Infection foot                                             |
| M07yz13 | Infection finger                                           |
| M07z.00 | Local infection skin/subcut tissue NOS                     |
| M07z.12 | Infected skin ulcer                                        |
| M07z.13 | Septic spots                                               |
| M07z.14 | Infected dermatitis                                        |
| M07z000 | Infection foot                                             |
| M07z100 | Infection toe                                              |
| M07z200 | Infection finger                                           |
| M09..00 | Cutaneous abscess                                          |
| M090.00 | [X]Abscess of face                                         |
| M091.00 | [X]Abscess of neck                                         |
| M092.00 | [X]Abscess of trunk                                        |
| M092000 | [X]Abscess of buttock                                      |
| M092100 | [X]Abdominal wall abscess                                  |
| M092200 | [X]Perineal abscess                                        |
| M093.00 | [X]Abscess of buttock                                      |
| M094.00 | [X]Abscess of limb                                         |
| M094000 | [X]Abscess of axilla                                       |
| M095.00 | Skin abscess                                               |
| M09y.00 | [X]Abscess of other site                                   |
| M0y..00 | Other specified infections of skin or subcutaneous tissue  |
| M0z..00 | Skin and subcut tissue infection NOS                       |
| M0z..11 | Infected sebaceous cyst                                    |
| M1...00 | Other skin and subcutaneous tissue inflammatory conditions |
| M2...00 | Other skin and subcutaneous tissue disorders               |
| M27..00 | Chronic skin ulcer                                         |

|         |                                                              |
|---------|--------------------------------------------------------------|
| M270.00 | Decubitus (pressure) ulcer                                   |
| M270.11 | Bed sore                                                     |
| M270.12 | Plaster ulcer                                                |
| M270.13 | Pressure sore                                                |
| M270.14 | Decubitus ulcer and pressure area                            |
| M270000 | Hospital acquired pressure ulcer                             |
| M270100 | Nursing home acquired pressure ulcer                         |
| M270200 | Community hospital acquired pressure ulcer                   |
| M270300 | Hospice acquired pressure ulcer                              |
| M270400 | Stage I decubitus ulcer and pressure area                    |
| M270500 | Stage II decubitus ulcer                                     |
| M270600 | Stage III decubitus ulcer                                    |
| M270700 | Stage IV decubitus ulcer                                     |
| M270z00 | Decubitus ulcer and pressure area NOS                        |
| M271.00 | Non-pressure ulcer lower limb                                |
| M271.11 | Foot ulcer                                                   |
| M271.12 | Ischaemic leg ulcer                                          |
| M271.13 | Leg ulcer NOS                                                |
| M271.14 | Neurogenic leg ulcer                                         |
| M271.15 | Trophic leg ulcer                                            |
| M271000 | Ischaemic ulcer diabetic foot                                |
| M271100 | Neuropathic diabetic ulcer - foot                            |
| M271200 | Mixed diabetic ulcer - foot                                  |
| M271300 | Arterial leg ulcer                                           |
| M271400 | Mixed venous and arterial leg ulcer                          |
| M271500 | Venous ulcer of leg                                          |
| M271600 | Traumatic leg ulcer                                          |
| M271700 | Neuropathic foot ulcer                                       |
| M272.00 | Ulcer of skin                                                |
| M273.00 | Non-healing leg ulcer                                        |
| M274.00 | Recurrent leg ulcer                                          |
| M27y.00 | Chronic ulcer of skin, other specified sites                 |
| M27z.00 | Chronic skin ulcer NOS                                       |
| M2y4D00 | Macerated perianal skin                                      |
| M2yA.00 | Skin sinus                                                   |
| M2yB.00 | Fistula of skin                                              |
| M2yz.11 | Skin lesion                                                  |
| M2z0.00 | Skin lesion                                                  |
| Myu0.00 | [X]Infections of the skin and subcutaneous tissue            |
| Myu0100 | [X]Other specified local infections/skin+subcutaneous tissue |
| R153300 | [D]Positive culture findings in wound                        |
| S002.00 | Open fracture vault of skull without intracranial injury     |
| S002000 | Open #skull vlt no intracranial injury, unspec state consc   |
| S002100 | Open #skull vlt no intracranial injury, no loss of consc     |
| S002200 | Open #skull vlt no intracranial injury, <1hr loss of consc   |
| S002300 | Open #skull vlt no intracranial injury, 1-24hr loss of consc |
| S002400 | Open #skull vlt no intracranial injury, >24hr LOC+recovery   |
| S002500 | Open #skull vlt no intracranial inj, >24hr LOC not restored  |
| S002600 | Open #skull vlt no intracranial injury, LOC unspec duration  |
| S002z00 | Open #skull vlt no intracranial injury + concussion unspec   |

|         |                                                              |
|---------|--------------------------------------------------------------|
| S003.00 | Open fracture vault of skull with intracranial injury        |
| S003000 | Open #skull vlt + intracranial injury, unspec state of consc |
| S003100 | Open #skull vlt + intracranial injury, no loss of consc      |
| S003200 | Open #skull vlt + intracranial injury, <1hr loss of consc    |
| S003300 | Open #skull vlt + intracranial injury, 1-24hr loss of consc  |
| S003400 | Open #skull vlt + intracranial injury, >24hr LOC + recovery  |
| S003500 | Open #skull vlt + intracranial inj, >24hr LOC not restored   |
| S003600 | Open #skull vlt + intracranial injury, LOC unspec duration   |
| S003z00 | Open #skull vlt with intracranial injury + concussion unspec |
| S012.00 | Open fracture base skull without mention intracranial injury |
| S012000 | Open #skull bse no intracranial inj, unspec state of consc   |
| S012100 | Open #skull bse no intracranial injury, no loss of consc     |
| S012200 | Open #skull bse no intracranial injury, <1hr loss of consc   |
| S012300 | Open #skull bse no intracranial injury, 1-24hr loss of consc |
| S012400 | Open #skull bse no intracranial injury, >24hr LOC+recovery   |
| S012500 | Open #skull bse no intracranial inj, >24hr LOC not restored  |
| S012600 | Open #skull bse no intracranial injury, LOC unspec duration  |
| S012z00 | Open #skull bse no intracranial injury + concussion unspec   |
| S013.00 | Open fracture base of skull with intracranial injury         |
| S013000 | Open #skull bse + intracranial injury, unspec state of consc |
| S013100 | Open #skull bse + intracranial injury, no loss of consc      |
| S013200 | Open #skull bse + intracranial injury, <1hr loss of consc    |
| S013300 | Open #skull bse + intracranial injury, 1-24hr loss of consc  |
| S013400 | Open #skull bse + intracranial injury, >24hr LOC + recovery  |
| S013500 | Open #skull bse + intracranial inj, >24hr LOC not restored   |
| S013600 | Open #skull bse + intracranial injury, LOC unspec duration   |
| S013z00 | Open #skull bse + intracranial injury + concussion unspec    |
| S032.00 | Open #skull NOS without mention of intracranial injury       |
| S032000 | Open #skull NOS no intracranial inj, unspec state of consc   |
| S032100 | Open #skull NOS no intracranial inj, no loss of consc        |
| S032200 | Open #skull NOS no intracranial inj, <1hr loss of consc      |
| S032300 | Open #skull NOS no intracranial inj, 1-24hrs loss of consc   |
| S032400 | Open #skull NOS no intracranial inj, >24hrs LOC + recovery   |
| S032500 | Open #skull NOS no intracranial inj, >24hrs LOC not restored |
| S032600 | Open #skull NOS no intracranial inj, LOC unspec duration     |
| S032z00 | Open #skull NOS no intracranial inj + concussion unspec      |
| S033.00 | Open fracture of skull NOS with intracranial injury          |
| S033000 | Open #skull NOS + intracranial inj, unspec state of consc    |
| S033100 | Open #skull NOS + intracranial inj, no loss of consc         |
| S033200 | Open #skull NOS + intracranial inj, <1hr loss of consc       |
| S033300 | Open #skull NOS + intracranial inj, 1-24hrs loss of consc    |
| S033400 | Open #skull NOS + intracranial inj, >24hrs LOC + recovery    |
| S033500 | Open #skull NOS + intracranial inj, >24hrs LOC not restored  |
| S033600 | Open #skull NOS + intracranial inj, LOC unspec duration      |
| S033z00 | Open #skull NOS + intracranial inj + concussion unspec       |
| S042000 | Open #skull/face, mult, no intracranial inj, unspec consc    |
| S042100 | Open #skull/face, mult, no intracranial inj, no loss consc   |
| S042200 | Open #skull/face, mult, no intracranial inj, <1hr LOC        |
| S042300 | Open #skull/face, mult, no intracranial inj, 1-24hrs LOC     |
| S042400 | Open #skull/face, mult, no intracran inj, >24hr LOC+recovery |

|         |                                                              |
|---------|--------------------------------------------------------------|
| S042500 | Open #skull/face,mult,no intracran inj,>24hr LOC no restored |
| S042600 | Open #skull/face,mult,no intracran inj, LOC unspec duration  |
| S042z00 | Open #skull/face,mult,no intracran inj, concussion unspec    |
| S043.00 | Mult #skull/face + other bones, open + intracranial injury   |
| S043000 | Open #skull/face, mult + intracranial inj, unspec consc      |
| S043100 | Open #skull/face, mult + intracranial inj, no loss consc     |
| S043200 | Open #skull/face, mult + intracranial inj, <1hr LOC          |
| S043300 | Open #skull/face, mult + intracranial inj, 1-24hrs LOC       |
| S043400 | Open #skull/face, mult + intracran inj, >24hr LOC + recovery |
| S043500 | Open #skull/face,mult + intracran inj, >24hr LOC no restored |
| S043600 | Open #skull/face, mult + intracran inj, LOC unspec duration  |
| S043z00 | Open #skull/face, mult + intracran inj + concussion, unspec  |
| S611000 | Cortex cont + open intracranial wound + unspec state consc   |
| S611100 | Cortex cont + open intracranial wound + no loss of consc     |
| S611200 | Cortex cont + open intracranial wound + <1hr loss of consc   |
| S611300 | Cortex cont + open intracranial wound + 1-24hr loss of consc |
| S611400 | Cortex cont + open intracranial wnd + >24hr LOC + recovery   |
| S611500 | Cortex cont + open intracranial wnd + >24hr LOC not restored |
| S611600 | Cortex cont + open intracranial wnd + LOC unspec duration    |
| S611z00 | Cortex cont + open intracranial wound + concussion unspec    |
| S613.00 | Cortex laceration with open intracranial wound               |
| S613000 | Cortex lacn + open intracranial wound + unspec state consc   |
| S613100 | Cortex lacn + open intracranial wound + no loss of consc     |
| S613200 | Cortex lacn + open intracranial wound + <1hr loss of consc   |
| S613300 | Cortex lacn + open intracranial wound + 1-24hr loss of consc |
| S613400 | Cortex lacn + open intracranial wound + >24hr LOC + recovery |
| S613500 | Cortex lacn + open intracranial wnd + >24hr LOC not restored |
| S613600 | Cortex lacn + open intracranial wnd + LOC unspec duration    |
| S613z00 | Cortex lacn + open intracranial wound + concussion unspec    |
| S615000 | Hind brain cont + open intracranial wnd + unspec state consc |
| S615100 | Hind brain cont + open intracranial wound + no loss consc    |
| S615200 | Hind brain cont + open intracranial wound + <1hr loss consc  |
| S615300 | Hind brain cont + open intracranial wnd + 1-24hr loss consc  |
| S615400 | Hind brain cont + open intracranial wnd +>24hr LOC +recovery |
| S615500 | Hind brain cont + open intracran wnd +>24hr LOC not restored |
| S615600 | Hind brain cont + open intracranial wnd +LOC unspec duration |
| S615z00 | Hind brain cont + open intracranial wnd + concussion unspec  |
| S617.00 | Hind brain laceration with open intracranial wound           |
| S617000 | Hind brain lacn + open intracranial wnd + unspec state consc |
| S617100 | Hind brain lacn + open intracranial wnd + no loss consc      |
| S617200 | Hind brain lacn + open intracranial wnd + <1hr loss consc    |
| S617300 | Hind brain lacn + open intracranial wnd + 1-24hr loss consc  |
| S617400 | Hind brain lacn + open intracranial wnd+>24hr LOC + recovery |
| S617500 | Hind brain lacn open intracranial wnd+>24hr LOC not restored |
| S617600 | Hind brain lacn + open intracran wnd + LOC unspec duration   |
| S617z00 | Hind brain lacn + open intracranial wnd + concussion unspec  |
| S61y000 | Brain cont + open intracranial wound + unspec state consc    |
| S61y100 | Brain cont + open intracranial wound + no loss of consc      |
| S61y200 | Brain cont + open intracranial wound + <1hr loss of consc    |
| S61y300 | Brain cont + open intracranial wound + 1-24hr loss of consc  |

|         |                                                              |
|---------|--------------------------------------------------------------|
| S61y400 | Brain cont + open intracranial wound + >24hr LOC + recovery  |
| S61y500 | Brain contusion + open intracr wound+>24hr LOC not ful reco  |
| S61y600 | Brain cont + open intracranial wound + LOC unspec duration   |
| S61yz00 | Brain cont + open intracranial wound + concussion unspec     |
| S621000 | Subarachnoid h'ge inj + open intracran wound + unspec consc  |
| S621100 | Subarachnoid h'ge inj + open intracranial wound + no LOC     |
| S621200 | Subarachnoid h'ge inj + open intracran wound+<1hr loss consc |
| S621300 | Subarachnoid h'ge inj + open intracran wnd+1-24hr loss consc |
| S621400 | Subarach h'ge inj + open intracran wnd +>24hr LOC + recovery |
| S621500 | Subarach h'ge inj + open intracran wnd+>24hr LOC -restored   |
| S621600 | Subarach h'ge inj + open intracran wnd+LOC unspec duration   |
| S621z00 | Subarachnoid h'ge inj + open intracran wnd+concussion unspec |
| S623000 | Subdural h'ge inj + open intracranial wound + unspec consc   |
| S623100 | Subdural h'ge inj + open intracranial wound+no loss consc    |
| S623200 | Subdural h'ge inj + open intracranial wound+<1hr loss consc  |
| S623300 | Subdural h'ge inj + open intracranial wnd+1-24hr loss consc  |
| S623400 | Subdural h'ge inj + open intracran wound+>24hr LOC +recovery |
| S623500 | Subdural h'ge inj + open intracran wnd+>24hr LOC -restored   |
| S623600 | Subdural h'ge inj + open intracran wnd+LOC unspec duration   |
| S623z00 | Subdural h'ge inj + open intracranial wnd+concussion unspec  |
| S625000 | Extradural h'ge inj + open intracranial wnd + unspec consc   |
| S625100 | Extradural h'ge inj + open intracranial wound+no loss consc  |
| S625200 | Extradural h'ge inj + open intracranial wnd+<1hr loss consc  |
| S625300 | Extradural h'ge inj + open intracran wnd+1-24hr loss consc   |
| S625400 | Extradural h'ge inj + open intracran wnd+>24hr LOC+recovery  |
| S625500 | Extradural h'ge inj + open intracran wnd+>24hr LOC -restored |
| S625600 | Extradural h'ge inj + open intracran wnd+LOC unspec duration |
| S625z00 | Extradural h'ge inj + open intracran wnd+concussion unspec   |
| S62A100 | Traumatic extradural haematoma with open intracranial wound  |
| S631.00 | Other cerebral h'ge after injury + open intracranial wound   |
| S631000 | Oth cerebral h'ge inj + open intracran wnd + unspec consc    |
| S631100 | Oth cerebral h'ge inj + open intracranial wnd+no loss consc  |
| S631200 | Oth cerebral h'ge inj + open intracran wnd+<1hr loss consc   |
| S631300 | Oth cerebral h'ge inj + open intracran wnd+1-24hr loss consc |
| S631400 | Oth cereb h'ge inj + open intracran wnd+>24hr LOC + recovery |
| S631500 | Oth cereb h'ge inj + open intracran wnd+>24hr LOC -restored  |
| S631600 | Oth cereb h'ge inj + open intracran wnd+LOC unspec duration  |
| S631z00 | Oth cereb h'ge inj + open intracran wnd+concussion unspec    |
| S641.00 | Intracranial injury NOS + open intracranial wound            |
| S641000 | Intracranial inj NOS + open intracranial wnd + unspec consc  |
| S641100 | Intracranial inj NOS + open intracranial wound+no loss consc |
| S641200 | Intracranial inj NOS + open intracranial wnd+<1hr loss consc |
| S641300 | Intracranial inj NOS + open intracranial wnd + 1-24hr LOC    |
| S641400 | Intracranial inj NOS + open intracran wnd+>24hr LOC+recovery |
| S641500 | Intracran inj NOS + open intracran wnd+>24hr LOC -restored   |
| S641600 | Intracran inj NOS + open intracran wnd+LOC unspec duration   |
| S641z00 | Intracranial inj NOS + open intracran wnd+concussion unspec  |
| S642100 | Traumatic cerebral oedema with open intracranial wound       |
| S645100 | Intracranial injury with prolonged coma with open wound      |
| S701.00 | Open traumatic pneumothorax                                  |

|         |                                                              |
|---------|--------------------------------------------------------------|
| S703.00 | Open traumatic haemothorax                                   |
| S705.00 | Open traumatic haemopneumothorax                             |
| S711.00 | Heart injury, open                                           |
| S711000 | Heart injury with open wound into thorax, unspecified        |
| S711100 | Heart contusion, with open wound into thorax                 |
| S711200 | Heart laceration open, without penetration of heart chambers |
| S711300 | Heart laceration open, with penetration of heart chambers    |
| S711z00 | Heart injury with open wound into thorax NOS                 |
| S713000 | Lung injury with open wound into thorax, unspecified         |
| S713100 | Lung contusion with open wound into thorax                   |
| S713200 | Lung laceration with open wound into thorax                  |
| S713z00 | Lung injury with open wound into thorax, NOS                 |
| S73yz00 | Gastrointestinal tract injury with open wound to cavity NOS  |
| S8...00 | Open wound of head, neck and trunk                           |
| S8...12 | Open wound of head                                           |
| S8...13 | Open wound of trunk                                          |
| S80..00 | Open wound of ocular adnexa                                  |
| S80..11 | Open wound of eyelid                                         |
| S80..12 | Periocular open wound                                        |
| S800.00 | Eyelid skin and periocular area laceration                   |
| S803.00 | Penetrating wound of orbit without mention of foreign body   |
| S804.00 | Penetrating wound of orbit with foreign body                 |
| S80y.00 | Other open ocular adnexa wound                               |
| S80z.00 | Open wound of ocular adnexa NOS                              |
| S81..00 | Open wound of eyeball                                        |
| S81..12 | Open wound of eye                                            |
| S810.00 | Ocular laceration without intraocular prolapse               |
| S81z.00 | Open wound of eyeball NOS                                    |
| S82..00 | Open wound of ear                                            |
| S820.00 | Open wound of external ear                                   |
| S820000 | Open wound of external ear, unspecified                      |
| S820100 | Open wound of ear auricle                                    |
| S820w00 | Other open wound of external ear                             |
| S820z00 | Open wound of external ear not otherwise specified           |
| S821.00 | Open wound of external ear with complication                 |
| S821000 | Open wound of external ear with complication, unspecified    |
| S821100 | Open wound of ear auricle with complication                  |
| S821z00 | Open wound of external ear with complication, NOS            |
| S82v.00 | Other open wound of ear                                      |
| S82v011 | Open wound of drumhead without complication                  |
| S82v012 | Open wound of tympanic membrane without complication         |
| S82v100 | Open wound of ear ossicle                                    |
| S82v300 | Open wound of cochlea                                        |
| S82vz00 | Other open wound of ear NOS                                  |
| S82w.00 | Other open wound of ear with complication                    |
| S82w000 | Open wound of ear drum with complication                     |
| S82w100 | Open wound of ear ossicle with complication                  |
| S82w300 | Open wound of cochlea with complication                      |
| S82wz00 | Other open wound of ear with complication NOS                |
| S82x.00 | Open wound of ear, uncomplicated not otherwise specified     |



|         |                                                   |
|---------|---------------------------------------------------|
| S82y.00 | Open wound of ear with complication, NOS          |
| S82z.00 | Open wound of ear NOS                             |
| S83..00 | Other open wound of head                          |
| S830.00 | Open wound of scalp                               |
| S830100 | Avulsion of scalp                                 |
| S831.00 | Open wound of scalp with complication             |
| S832.00 | Open wound of nose                                |
| S832000 | Open wound of nose, unspecified                   |
| S832100 | Open wound of nasal septum                        |
| S832200 | Open wound of nasal cavity                        |
| S832300 | Open wound of nasal sinus                         |
| S832x00 | Multiple wounds of nose                           |
| S832z00 | Open wound of nose NOS                            |
| S833.00 | Open wound of nose with complication              |
| S833000 | Open wound of nose with complication, unspecified |
| S833100 | Open wound of nasal septum with complication      |
| S833200 | Open wound of nasal cavity with complication      |
| S833300 | Open wound of nasal sinus with complication       |
| S833x00 | Multiple open wounds of nose with complication    |
| S833z00 | Open wound of nose with complication, NOS         |
| S834.00 | Open wound of face                                |
| S834000 | Open wound of face, unspecified                   |
| S834100 | Open wound of cheek                               |
| S834200 | Open wound of forehead                            |
| S834300 | Open wound of eyebrow                             |
| S834400 | Open wound of lip                                 |
| S834500 | Open wound of jaw                                 |
| S834600 | Open wound of chin                                |
| S834x00 | Multiple open wounds of face                      |
| S834z00 | Open wound of face, NOS                           |
| S835.00 | Open wound of face with complication              |
| S835000 | Open wound of face with complication, unspecified |
| S835100 | Open wound of cheek with complication             |
| S835200 | Open wound of forehead with complication          |
| S835300 | Open wound of eyebrow with complication           |
| S835400 | Open wound of lip with complication               |
| S835500 | Open wound of jaw with complication               |
| S835x00 | Multiple open wounds of face with complication    |
| S835z00 | Open wound of face with complication, NOS         |
| S836.00 | Open wound in mouth                               |
| S836000 | Open wound in mouth, unspecified                  |
| S836100 | Open wound of buccal mucosa                       |
| S836200 | Open wound of gum                                 |
| S836400 | Open wound of tongue                              |
| S836500 | Open wound of mouth floor                         |
| S836600 | Open wound of palate                              |
| S837100 | Open wound of buccal mucosa with complication     |
| S837200 | Open wound of gum with complication               |
| S837400 | Open wound of tongue with complication            |
| S837500 | Open wound of mouth floor with complication       |

|         |                                                            |
|---------|------------------------------------------------------------|
| S837600 | Open wound of palate with complication                     |
| S83x.00 | Other open wound of head                                   |
| S83y.00 | Other open wound of head with complication                 |
| S83z.00 | Open wound of head NOS                                     |
| S84..00 | Open wound of neck                                         |
| S840.00 | Open wound of larynx and trachea                           |
| S840.11 | Open wound of larynx without complication                  |
| S840.12 | Open wound of trachea without complication                 |
| S840000 | Open wound of larynx and trachea, unspecified              |
| S840100 | Open wound of larynx                                       |
| S840200 | Open wound of trachea                                      |
| S840z00 | Open wound of larynx and trachea not otherwise specified   |
| S841.00 | Open wound of larynx and trachea with complication         |
| S841.11 | Open wound of larynx with complication                     |
| S841.12 | Open wound of trachea with complication                    |
| S841000 | Open wound of larynx and trachea with complication, unspec |
| S841100 | Open wound of larynx with complication                     |
| S841200 | Open wound of trachea with complication                    |
| S841z00 | Open wound of larynx and trachea with complication, NOS    |
| S842.00 | Open wound of thyroid                                      |
| S843.00 | Open wound of thyroid with complication                    |
| S844.00 | Open wound of pharynx                                      |
| S845.00 | Open wound of pharynx with complication                    |
| S84x.00 | Other open wound of neck                                   |
| S84x000 | Open wound of neck nape                                    |
| S84x100 | Open wound of supraclavicular region                       |
| S84xz00 | Open wound of neck, NOS                                    |
| S84xz11 | Open wound of throat NOS                                   |
| S84y.00 | Other open wound of neck with complication                 |
| S84y000 | Open wound of neck nape with complication                  |
| S84y100 | Open wound of supraclavicular region with complication     |
| S84yz00 | Open wound of neck with complication, NOS                  |
| S84z.00 | Open wound of neck NOS                                     |
| S85..00 | Open wound of chest wall                                   |
| S850.00 | Open wound of chest wall, uncomplicated                    |
| S850000 | Degloving injury chest wall                                |
| S851.00 | Open wound of chest wall with complication                 |
| S852.00 | Open wound of front wall of thorax                         |
| S853.00 | Multiple open wounds of thoracic wall                      |
| S855.00 | Open wound of back wall of thorax                          |
| S85X.00 | Open wound of thorax, part unspecified                     |
| S85z.00 | Open wound of chest wall NOS                               |
| S86..00 | Open wound of back                                         |
| S86..11 | Open wound of loin                                         |
| S86..12 | Open wound of lumbar region                                |
| S860.00 | Open wound of back, uncomplicated                          |
| S860000 | Degloving injury back                                      |
| S861.00 | Open wound of back with complication                       |
| S86z.00 | Open wound of back NOS                                     |
| S87..00 | Open wound of buttock                                      |

|         |                                                              |
|---------|--------------------------------------------------------------|
| S87..11 | Open wound of sacroiliac region                              |
| S870.00 | Open wound of buttock, uncomplicated                         |
| S870000 | Degloving injury buttock                                     |
| S871.00 | Open wound of buttock with complication                      |
| S87z.00 | Open wound of buttock NOS                                    |
| S88..00 | Open wound of external genital organs                        |
| S880.00 | Open wound of penis                                          |
| S880000 | Degloving injury penis                                       |
| S881.00 | Open wound of penis with complication                        |
| S882.00 | Open wound of scrotum and testes                             |
| S882000 | Open wound of scrotum                                        |
| S882100 | Open wound of testes                                         |
| S882200 | Degloving injury scrotum                                     |
| S882z00 | Open wound of scrotum and testes not otherwise specified     |
| S883.00 | Open wound of scrotum and testes with complication           |
| S883000 | Open wound of scrotum with complication                      |
| S883100 | Open wound of testes with complication                       |
| S883z00 | Open wound of scrotum and testes with complication, NOS      |
| S884.00 | Open wound of vulva                                          |
| S884000 | Open wound of vulva, unspecified                             |
| S884100 | Open wound of labium majus                                   |
| S884200 | Open wound of labium minus                                   |
| S884z00 | Open wound of vulva, NOS                                     |
| S885.00 | Open wound of vulva with complication                        |
| S885000 | Open wound of vulva with complication, unspecified           |
| S885100 | Open wound of labium majus with complication                 |
| S885200 | Open wound of labium minus with complication                 |
| S885z00 | Open wound of vulva with complication, NOS                   |
| S886.00 | Open wound of vagina                                         |
| S887.00 | Open wound of vagina with complication                       |
| S88x.00 | Other open wound of external genital organ                   |
| S88y.00 | Other open wound of external genital organ with complication |
| S88z.00 | Open wound of external genital organ NOS                     |
| S89..00 | Other open wounds of other sites, excluding limbs            |
| S890.00 | Open wound of breast                                         |
| S891.00 | Open wound of breast with complication                       |
| S892.00 | Open wound of anterior abdominal wall                        |
| S892000 | Open wound of epigastric region                              |
| S892100 | Open wound umbilical region                                  |
| S892200 | Open wound of hypogastric region                             |
| S892300 | Open wound of pubic region without complication              |
| S892z00 | Open wound anterior abdominal wall without complication NOS  |
| S893.00 | Open wound of anterior abdominal wall with complication      |
| S893000 | Open wound of epigastrium with complication                  |
| S893100 | Open wound of umbilical region with complication             |
| S893200 | Open wound of hypogastrium with complication                 |
| S893300 | Open wound of pubic region with complication                 |
| S893z00 | Open wound of anterior abdominal wall with complication NOS  |
| S894.00 | Open wound of lateral abdominal wall                         |
| S894000 | Open wound of hypochondrium                                  |

|         |                                                              |
|---------|--------------------------------------------------------------|
| S894100 | Open wound of lumbar region                                  |
| S894111 | Open wound of flank without complication                     |
| S894200 | Open wound of iliac region                                   |
| S894300 | Open wound of inguinal region                                |
| S894311 | Open wound of groin without complication                     |
| S894400 | Open wound of flank without complication                     |
| S894500 | Open wound of loin                                           |
| S894z00 | Open wound of lateral abdominal wall NOS                     |
| S895.00 | Open wound of lateral abdominal wall with complication       |
| S895000 | Open wound of hypochondrium with complication                |
| S895100 | Open wound of lumbar region with complication                |
| S895111 | Open wound of flank with complication                        |
| S895200 | Open wound of iliac region with complication                 |
| S895300 | Open wound of inguinal region with complication              |
| S895311 | Open wound of groin with complication                        |
| S895400 | Open wound of flank with complication                        |
| S895z00 | Open wound of lateral abdominal wall with complication, NOS  |
| S89v.00 | Other and unspecified open wound of trunk                    |
| S89v000 | Open wound of pelvic region                                  |
| S89v100 | Open wound of perineum                                       |
| S89vz00 | Other and unspecified open wound of trunk, NOS               |
| S89w.00 | Other and unspecified open wound of trunk with complication  |
| S89w000 | Open wound of pelvic region with complication                |
| S89w100 | Open wound of perineum with complication                     |
| S89wz00 | Other and unspecified open wound trunk with complication NOS |
| S89x.00 | Multiple open wounds, of unspecified site                    |
| S89y.00 | Multiple open wounds with complication, of unspecified site  |
| S89z.00 | Other open wounds NOS                                        |
| S8A..00 | Open wounds involving head with neck                         |
| S8z..00 | Open wound of head, neck and trunk NOS                       |
| S8z..11 | Laceration NOS                                               |
| S8z..12 | Traumatic ulcer NOS                                          |
| S8z..13 | Laceration                                                   |
| S9...00 | Open wound of upper limb                                     |
| S9...11 | Laceration of arm                                            |
| S9...12 | Open wound of arm                                            |
| S90..00 | Open wound of shoulder region and upper limb                 |
| S900.00 | Open wound of shoulder/upper limb without complication       |
| S900000 | Open wound of shoulder region                                |
| S900100 | Open wound of scapular region                                |
| S900200 | Open wound of axillary region                                |
| S900300 | Open wound of upper arm                                      |
| S900400 | Multiple open wounds of shoulder and upper arm               |
| S900x00 | Multiple open wounds of upper arm                            |
| S900z00 | Open wound of shoulder and upper limb NOS                    |
| S901.00 | Open wound of shoulder and upper limb with complication      |
| S901000 | Open wound of shoulder region with complication              |
| S901100 | Open wound of scapular region with complication              |
| S901200 | Open wound of axillary region with complication              |
| S901300 | Open wound of upper arm with complication                    |

|         |                                                             |
|---------|-------------------------------------------------------------|
| S901x00 | Multiple open wounds of upper arm with complication         |
| S901z00 | Open wound of shoulder and upper arm with complication, NOS |
| S902.00 | Open wound of shoulder/upper limb with tendon involvement   |
| S902.11 | Open wound of arm with tendon injury                        |
| S902000 | Open wound of shoulder region with tendon involvement       |
| S902100 | Open wound of scapular region with tendon involvement       |
| S902200 | Open wound of axillary region with tendon involvement       |
| S902300 | Open wound of upper arm with tendon involvement             |
| S902x00 | Multiple open wounds of upper arm with tendon involvement   |
| S902z00 | Open wound shoulder/upper arm with tendon involvement, NOS  |
| S903.00 | Degloving injury, shoulder or upper arm                     |
| S903000 | Degloving injury, shoulder area                             |
| S903100 | Degloving injury, scapular area                             |
| S903200 | Degloving injury, axilla                                    |
| S903300 | Degloving injury, upper arm                                 |
| S90z.00 | Open wound of shoulder region and upper arm NOS             |
| S91..00 | Open wound of elbow, forearm and wrist                      |
| S910.00 | Open wound of lower arm without mention of complication     |
| S910000 | Open wound of forearm                                       |
| S910100 | Open wound of elbow                                         |
| S910200 | Open wound of wrist, unspecified                            |
| S910300 | Open wound of wrist, volar                                  |
| S910400 | Open wound of wrist, dorsal                                 |
| S910z00 | Open wound of lower arm, NOS                                |
| S911.00 | Open wound of lower arm with complication                   |
| S911000 | Open wound of forearm with complication                     |
| S911100 | Open wound of elbow with complication                       |
| S911200 | Open wound of wrist with complication                       |
| S911z00 | Open wound of lower arm with complication, NOS              |
| S912.00 | Open wound of lower arm with tendon involvement             |
| S912.11 | Open wound of lower arm with tendon injury                  |
| S912000 | Open wound of forearm with tendon involvement               |
| S912100 | Open wound of elbow with tendon involvement                 |
| S912200 | Open wound of wrist with tendon involvement                 |
| S912300 | Complete division extensor tendon wrist                     |
| S912400 | Complete division flexor tendon wrist                       |
| S912z00 | Open wound of lower arm with tendon involvement, NOS        |
| S913.00 | Degloving injury lower arm                                  |
| S913000 | Degloving injury, forearm                                   |
| S913100 | Degloving injury, elbow area                                |
| S913200 | Degloving injury wrist, volar                               |
| S913300 | Degloving injury wrist, dorsum                              |
| S91z.00 | Open wound of elbow, forearm and wrist NOS                  |
| S92..00 | Open wound of hand, excluding finger(s)                     |
| S920.00 | Open wound of hand without mention of complication          |
| S920000 | Open wound of hand, palm                                    |
| S920100 | Open wound of hand, dorsum                                  |
| S920200 | Multiple open wounds of wrist and hand                      |
| S921.00 | Open wound of hand with complication                        |
| S922.00 | Open wound of hand with tendon involvement                  |

|         |                                                             |
|---------|-------------------------------------------------------------|
| S923.00 | Degloving injury hand                                       |
| S923000 | Degloving injury hand, palmar                               |
| S923100 | Degloving injury hand, dorsum                               |
| S924.00 | Severe multi tissue damage hand                             |
| S925.00 | Massive multi tissue damage hand                            |
| S92z.00 | Open wound of hand, excluding fingers, NOS                  |
| S93..00 | Open wound of finger(s) or thumb                            |
| S93..11 | Open wound of fingernail                                    |
| S93..12 | Open wound of nail                                          |
| S93..13 | Open wound of thumb                                         |
| S93..14 | Open wound of thumbnail                                     |
| S930.00 | Open wound of finger or thumb without mention of complicatn |
| S930000 | Open wound, finger                                          |
| S930100 | Open wound, finger, multiple                                |
| S930200 | Open wound, thumb                                           |
| S931.00 | Open wound of finger or thumb with complication             |
| S932.00 | Open wound of finger or thumb with tendon involvement       |
| S932.11 | Open wound of finger with tendon injury                     |
| S932000 | Complete division, flexor digitorum superficialis tendon    |
| S932100 | Complete division, flexor digitorum profundus tendon        |
| S932200 | Complete division, both flexor tendons                      |
| S932300 | Complete division, extensor digitorum tendon                |
| S932400 | Mallet finger with open tendon injury                       |
| S932500 | Complete division, flexor pollicis longus tendon            |
| S932600 | Complete division, extensor pollicis longus tendon          |
| S932700 | Mallet thumb with open tendon injury                        |
| S933.00 | Degloving injury, finger                                    |
| S933000 | Degloving injury, finger unspecified                        |
| S933100 | Degloving injury, finger, multiple                          |
| S933200 | Ring avulsion injury, class 1                               |
| S933300 | Ring avulsion injury, class 2                               |
| S933400 | Ring avulsion injury, class 3                               |
| S933500 | Ring avulsion injury, class 4                               |
| S934.00 | Degloving injury, thumb                                     |
| S935.00 | Open wound fingernail                                       |
| S936.00 | Open wound thumbnail                                        |
| S937.00 | Open wound of finger with damage to nail                    |
| S938.00 | Open wound of thumb with damage to nail                     |
| S93z.00 | Open wound of finger(s) NOS                                 |
| S94..00 | Multiple and unspecified open wound of upper limb           |
| S940.00 | Multiple/unspec open wound upper limb without complication  |
| S941.00 | Multiple/unspec open wound of upper limb with complication  |
| S942.00 | Multiple/unspec open wound upper limb with tendon involved  |
| S942.11 | Multiple/unspec open wound of upper limb with tendon injury |
| S94z.00 | Multiple and unspecified open wound of upper limb NOS       |
| S96X.00 | Comb traum amp of (part of) fing(s) + oth part wrist/hand   |
| S9z..00 | Open wound of upper limb NOS                                |
| SA...00 | Open wound of lower limb                                    |
| SA...11 | Open wound of leg                                           |
| SA...12 | Laceration - leg                                            |

|         |                                                             |
|---------|-------------------------------------------------------------|
| SA0..00 | Open wound of hip and thigh                                 |
| SA00.00 | Open wound of hip and thigh without mention of complication |
| SA00000 | Open wound of hip                                           |
| SA00100 | Open wound of thigh                                         |
| SA00z00 | Open wound hip and thigh, NOS                               |
| SA01.00 | Open wound of hip and thigh with complication               |
| SA01000 | Open wound of hip with complication                         |
| SA01100 | Open wound of thigh with complication                       |
| SA01z00 | Open wound of hip and thigh with complication, NOS          |
| SA02.00 | Open wound of hip and thigh with tendon involvement         |
| SA02.11 | Open wound of hip and thigh with tendon injury              |
| SA02000 | Open wound of hip with tendon involvement                   |
| SA02100 | Open wound of thigh with tendon involvement                 |
| SA02200 | Complete division, quadriceps tendon                        |
| SA02300 | Complete division, hamstring tendon                         |
| SA02z00 | Open wound of hip and thigh with tendon involvement, NOS    |
| SA03.00 | Degloving injury, hip or thigh                              |
| SA03000 | Degloving injury, hip                                       |
| SA03100 | Degloving injury, thigh                                     |
| SA04.00 | Severe multi tissue damage hip or thigh                     |
| SA05.00 | Massive multi tissue damage hip or thigh                    |
| SA0z.00 | Open wound of hip and thigh NOS                             |
| SA1..00 | Open wound of knee, leg and ankle                           |
| SA10.00 | Open wound of knee, leg and ankle without complication      |
| SA10000 | Open wound of knee                                          |
| SA10100 | Open wound of leg                                           |
| SA10200 | Open wound of ankle                                         |
| SA10z00 | Open wound of knee, leg and ankle NOS                       |
| SA11.00 | Open wound of knee, leg and ankle with complication         |
| SA11000 | Open wound of knee with complication                        |
| SA11100 | Open wound of lower leg with complication                   |
| SA11200 | Open wound of ankle with complication                       |
| SA11z00 | Open wound of knee/leg/ankle with complication, NOS         |
| SA12.00 | Open wound of knee, leg and ankle with tendon involvement   |
| SA12.11 | Open wound of leg with tendon injury                        |
| SA12000 | Open wound of knee with tendon involvement                  |
| SA12100 | Open wound of lower leg with tendon involvement             |
| SA12200 | Open wound of ankle with tendon involvement                 |
| SA12300 | Complete division, patellar tendon                          |
| SA12400 | Complete division, tendocalcaneus (Achilles tendon)         |
| SA12z00 | Open wound of knee/leg/ankle with tendon involvement, NOS   |
| SA13.00 | Degloving injury, knee or leg or ankle                      |
| SA13000 | Degloving injury, knee                                      |
| SA13100 | Degloving injury, lower leg                                 |
| SA13200 | Degloving injury, ankle                                     |
| SA14.00 | Severe multi tissue damage lower leg                        |
| SA15.00 | Massive multi tissue damage lower leg                       |
| SA16.00 | Multiple injuries of ankle and foot                         |
| SA1z.00 | Open wound of knee, leg and ankle NOS                       |
| SA2..00 | Open wound of foot, excluding toe(s)                        |

|         |                                                             |
|---------|-------------------------------------------------------------|
| SA2..11 | Open wound of heel                                          |
| SA20.00 | Open wound of foot without mention of complication          |
| SA20100 | Open wound foot, plantar                                    |
| SA20200 | Open wound foot, dorsum                                     |
| SA20300 | Open wound, heel                                            |
| SA21.00 | Open wound of foot with complication                        |
| SA22.00 | Open wound of foot with tendon involvement                  |
| SA22.11 | Open wound of foot with tendon injury                       |
| SA22000 | Complete division, flexor tendon, foot                      |
| SA22100 | Complete division, extensor tendon, foot                    |
| SA23.00 | Degloving injury, foot                                      |
| SA23000 | Degloving injury foot, plantar                              |
| SA23100 | Degloving injury foot, dorsum                               |
| SA23200 | Degloving injury heel                                       |
| SA24.00 | Severe multi tissue damage foot                             |
| SA25.00 | Massive multi tissue damage foot                            |
| SA2z.00 | Open wound of foot NOS                                      |
| SA3..00 | Open wound of toe(s)                                        |
| SA3..11 | Open wound of toenail                                       |
| SA30.00 | Open wound of toe(s) without mention of complication        |
| SA31.00 | Open wound of toe(s) with complication                      |
| SA32.00 | Open wound of toe(s) with tendon involvement                |
| SA32.11 | Open wound of toe(s) with tendon injury                     |
| SA33.00 | Degloving injury toe(s)                                     |
| SA33000 | Degloving injury toe                                        |
| SA33100 | Degloving injury, multiple toes                             |
| SA34.00 | Open wound of toe(s) with damage to nail                    |
| SA3z.00 | Open wound of toe(s) NOS                                    |
| SA4..00 | Multiple and unspecified open wound of lower limb           |
| SA40.00 | Multiple and unspec open wound leg, without complication    |
| SA41.00 | Multiple and unspec open wound of leg with complication     |
| SA42.00 | Multiple and unspec open wound leg with tendon involvement  |
| SA4z.00 | Multiple and unspecified open wound of lower limb NOS       |
| SA9..00 | Multiple open wounds of hip and thigh                       |
| SAA..00 | Open wounds involving multiple regions of lower limb(s)     |
| SAz..00 | Open wound of lower limb NOS                                |
| SC10.00 | Late effect of open wound of head, neck and trunk           |
| SC11.00 | Late effect of open wound arm or leg without tendon injury  |
| SC15.00 | Late effect of burn of eye, head and neck                   |
| SC15.11 | Late effect of burn of head or neck                         |
| SC16.00 | Late effect of burn of wrist and hand                       |
| SC17.00 | Late effect of burn of arm, leg and foot                    |
| SC17.11 | Late effect of burn of arm or leg                           |
| SC18.00 | Late effect of other burns                                  |
| SC19.00 | Late effect of burn NOS                                     |
| SC1A.00 | Late effect of burn of upper limb                           |
| SC38.00 | Sequelae of open wound of head                              |
| SC3A.00 | Sequelae of superficial injury + open wound of neck + trunk |
| SC3C.00 | Sequelae of open wound of upper limb                        |
| SC3D000 | Sequelae of open wound of lower limb                        |



|         |                                                              |
|---------|--------------------------------------------------------------|
| SC44.00 | Sequelae of burns, corrosions and frostbite                  |
| SC44000 | Sequelae of burn, corrosion and frostbite of trunk           |
| SC44100 | Sequelae of burn, corrosion and frostbite of lower limb      |
| SC44200 | Seq/burn+corros classfbl only accord extent/body surf involv |
| SD01.00 | Abrasion or friction burn of head, infected                  |
| SD01.11 | Abrasion or friction burn of head, infected                  |
| SD01000 | Abrasion of face, infected                                   |
| SD01100 | Abrasion of neck, infected                                   |
| SD01200 | Abrasion of scalp, infected                                  |
| SD01z00 | Abrasion or friction burn of head, infected, NOS             |
| SD03.00 | Blister of head, infected                                    |
| SD03000 | Blister of face, infected                                    |
| SD03100 | Blister of neck, infected                                    |
| SD03200 | Blister of scalp, infected                                   |
| SD03z00 | Blister of head, infected, NOS                               |
| SD05.00 | Insect bite, nonvenomous, of head, infected                  |
| SD05.11 | Insect bite, nonvenomous, of head, infected                  |
| SD05000 | Insect bite, nonvenomous, of face, infected                  |
| SD05100 | Insect bite, nonvenomous, of neck, infected                  |
| SD05200 | Insect bite, nonvenomous, of scalp, infected                 |
| SD05z00 | Insect bite, nonvenomous, of head, infected, NOS             |
| SD11.00 | Abrasion or friction burn of trunk, infected                 |
| SD11000 | Abrasion of interscapular region, infected                   |
| SD11100 | Abrasion of chest wall, infected                             |
| SD11200 | Abrasion of breast, infected                                 |
| SD11300 | Abrasion of abdominal wall, infected                         |
| SD11400 | Abrasion of back, infected                                   |
| SD11500 | Abrasion of buttock, infected                                |
| SD11600 | Abrasion of anus, infected                                   |
| SD11700 | Abrasion of flank, infected                                  |
| SD11800 | Abrasion of groin, infected                                  |
| SD11900 | Abrasion of perineum, infected                               |
| SD11A00 | Abrasion of penis, infected                                  |
| SD11B00 | Abrasion of scrotum and testis, infected                     |
| SD11B11 | Abrasion or friction burn of scrotum, infected               |
| SD11B12 | Abrasion or friction burn of testis, infected                |
| SD11C00 | Abrasion of vulva, infected                                  |
| SD11z00 | Abrasion or friction burn of trunk, infected, NOS            |
| SD13.00 | Blister of trunk, infected                                   |
| SD13000 | Blister of interscapular region, infected                    |
| SD13100 | Blister of chest wall, infected                              |
| SD13200 | Blister of breast, infected                                  |
| SD13300 | Blister of abdominal wall, infected                          |
| SD13400 | Blister of back, infected                                    |
| SD13500 | Blister of buttock, infected                                 |
| SD13600 | Blister of anus, infected                                    |
| SD13700 | Blister of flank, infected                                   |
| SD13800 | Blister of groin, infected                                   |
| SD13900 | Blister of perineum, infected                                |
| SD13A00 | Blister of penis, infected                                   |

|         |                                                             |
|---------|-------------------------------------------------------------|
| SD13B00 | Blister of scrotum and testis, infected                     |
| SD13B11 | Blister of scrotum, infected                                |
| SD13B12 | Blister of testis, infected                                 |
| SD13C00 | Blister of vulva, infected                                  |
| SD13D00 | Blister of vagina, infected                                 |
| SD13z00 | Blister of trunk, infected, NOS                             |
| SD15.00 | Insect bite, nonvenomous, of trunk, infected                |
| SD15000 | Insect bite, nonvenomous, of interscapular region, infected |
| SD15100 | Insect bite, nonvenomous, of chest wall, infected           |
| SD15200 | Insect bite, nonvenomous, of breast, infected               |
| SD15300 | Insect bite, nonvenomous, of abdominal wall, infected       |
| SD15400 | Insect bite, nonvenomous, of back, infected                 |
| SD15500 | Insect bite, nonvenomous, of buttock, infected              |
| SD15600 | Insect bite, nonvenomous, of anus, infected                 |
| SD15700 | Insect bite, nonvenomous, of flank, infected                |
| SD15800 | Insect bite, nonvenomous, of groin, infected                |
| SD15900 | Insect bite, nonvenomous, of perineum, infected             |
| SD15A00 | Insect bite, nonvenomous, of penis, infected                |
| SD15B00 | Insect bite, nonvenomous, of scrotum and testis, infected   |
| SD15B11 | Insect bite, nonvenomous, of scrotum, infected              |
| SD15B12 | Insect bite, nonvenomous, of testis, infected               |
| SD15C00 | Insect bite, nonvenomous, of vulva, infected                |
| SD15D00 | Insect bite, nonvenomous, of vagina, infected               |
| SD15z00 | Insect bite, nonvenomous, of trunk, infected, NOS           |
| SD1z.00 | Superficial injury of trunk NOS, infected                   |
| SD1z000 | Superficial injury of interscapular region NOS, infected    |
| SD1z100 | Superficial injury of chest wall NOS, infected              |
| SD1z200 | Superficial injury of breast NOS, infected                  |
| SD1z300 | Superficial injury of abdominal wall NOS, infected          |
| SD1z400 | Superficial injury of back NOS, infected                    |
| SD1z500 | Superficial injury of buttock NOS, infected                 |
| SD1z600 | Superficial injury of anus NOS, infected                    |
| SD1z700 | Superficial injury of flank NOS, infected                   |
| SD1z800 | Superficial injury of groin NOS, infected                   |
| SD1z900 | Superficial injury of perineum NOS, infected                |
| SD1zA00 | Superficial injury of penis NOS, infected                   |
| SD1zB00 | Superficial injury of scrotum and testis NOS, infected      |
| SD1zC00 | Superficial injury of vulva NOS, infected                   |
| SD1zz00 | Superficial injury of trunk NOS, infection NOS              |
| SD21.00 | Abrasion or friction burn of shoulder/upper arm, infected   |
| SD21000 | Abrasion of shoulder, infected                              |
| SD21100 | Abrasion of scapular region, infected                       |
| SD21200 | Abrasion of axilla, infected                                |
| SD21300 | Abrasion of upper arm, infected                             |
| SD21z00 | Abrasion or friction burn shoulder/upper arm, infected, NOS |
| SD23.00 | Blister of shoulder and upper arm, infected                 |
| SD23000 | Blister of shoulder, infected                               |
| SD23100 | Blister of scapular region, infected                        |
| SD23200 | Blister of axilla, infected                                 |
| SD23300 | Blister of upper arm, infected                              |

|         |                                                             |
|---------|-------------------------------------------------------------|
| SD23z00 | Blister of shoulder and upper arm, infected, NOS            |
| SD25.00 | Insect bite, nonvenomous, of shoulder/upper arm, infected   |
| SD25000 | Insect bite, nonvenomous, of shoulder, infected             |
| SD25100 | Insect bite, nonvenomous, of interscapular region, infected |
| SD25200 | Insect bite, nonvenomous, of axilla, infected               |
| SD25300 | Insect bite, nonvenomous, of upper arm, infected            |
| SD25z00 | Insect bite, nonvenomous, shoulder/upper arm, infected, NOS |
| SD2z.00 | Superficial injury of shoulder and upper arm NOS, infected  |
| SD2z000 | Superficial injury of shoulder NOS, infected                |
| SD2z100 | Superficial injury of scapular region NOS, infected         |
| SD2z200 | Superficial injury of axilla NOS, infected                  |
| SD2z300 | Superficial injury of upper arm NOS, infected               |
| SD2zz00 | Superficial injury shoulder/upper arm, infection NOS        |
| SD31.00 | Abrasion or friction burn of lower arm, infected            |
| SD31000 | Abrasion of elbow, infected                                 |
| SD31100 | Abrasion of forearm, infected                               |
| SD31200 | Abrasion of wrist, infected                                 |
| SD31z00 | Abrasion or friction burn of lower arm, infected, NOS       |
| SD33.00 | Blister of lower arm, infected                              |
| SD33000 | Blister of elbow, infected                                  |
| SD33100 | Blister of forearm, infected                                |
| SD33200 | Blister of wrist, infected                                  |
| SD33z00 | Blister of lower arm, infected, NOS                         |
| SD35.00 | Insect bite, nonvenomous, of lower arm, infected            |
| SD35000 | Insect bite, nonvenomous, of elbow, infected                |
| SD35100 | Insect bite, nonvenomous, of forearm, infected              |
| SD35200 | Insect bite, nonvenomous, of wrist, infected                |
| SD35z00 | Insect bite, nonvenomous, of lower arm, infected, NOS       |
| SD3z.00 | Superficial injury of lower arm NOS, infected               |
| SD3z000 | Superficial injury of elbow NOS, infected                   |
| SD3z100 | Superficial injury of forearm NOS, infected                 |
| SD3z200 | Superficial injury of wrist NOS, infected                   |
| SD3zz00 | Superficial injury of lower arm, infected NOS               |
| SD41.00 | Abrasion or friction burn of hand, infected                 |
| SD43.00 | Blister of hand, infected                                   |
| SD45.00 | Insect bite, nonvenomous, of hand, infected                 |
| SD4z.00 | Superficial injury of hand NOS, infected                    |
| SD51.00 | Abrasion or friction burn of finger, infected               |
| SD53.00 | Blister of finger, infected                                 |
| SD55.00 | Insect bite, nonvenomous, of finger, infected               |
| SD5z.00 | Superficial injury of finger NOS, infected                  |
| SD61.00 | Abrasion or friction burn of lower limb, infected           |
| SD61.11 | Abrasion or friction burn of leg, infected                  |
| SD61000 | Abrasion of hip, infected                                   |
| SD61100 | Abrasion of thigh, infected                                 |
| SD61200 | Abrasion of knee, infected                                  |
| SD61300 | Abrasion of lower leg, infected                             |
| SD61400 | Abrasion of ankle, infected                                 |
| SD61z00 | Abrasion or friction burn of lower limb, infected, NOS      |
| SD63.00 | Blister of lower limb, infected                             |

|         |                                                          |
|---------|----------------------------------------------------------|
| SD63.11 | Blister of leg, infected                                 |
| SD63000 | Blister of hip, infected                                 |
| SD63100 | Blister of thigh, infected                               |
| SD63200 | Blister of knee, infected                                |
| SD63300 | Blister of lower leg, infected                           |
| SD63400 | Blister of ankle, infected                               |
| SD63z00 | Blister of lower limb, infected, NOS                     |
| SD65.00 | Insect bite, nonvenomous, of lower limb, infected        |
| SD65.11 | Insect bite, nonvenomous, of leg, infected               |
| SD65000 | Insect bite, nonvenomous, of hip, infected               |
| SD65100 | Insect bite, nonvenomous, of thigh, infected             |
| SD65200 | Insect bite, nonvenomous, of knee, infected              |
| SD65300 | Insect bite, nonvenomous, of lower leg, infected         |
| SD65400 | Insect bite, nonvenomous, of ankle, infected             |
| SD65z00 | Insect bite, nonvenomous, of lower limb, infected, NOS   |
| SD6z.00 | Superficial injury of lower limb, infected               |
| SD6z000 | Superficial injury of hip NOS, infected                  |
| SD6z100 | Superficial injury of thigh NOS, infected                |
| SD6z200 | Superficial injury of knee NOS, infected                 |
| SD6z300 | Superficial injury of lower leg NOS, infected            |
| SD6z400 | Superficial injury of ankle NOS, infected                |
| SD6zz00 | Superficial injury of lower limb, infected, NOS          |
| SD71.00 | Abrasion or friction burn of foot and toe, infected      |
| SD71.11 | Abrasion or friction burn of heel, infected              |
| SD71.12 | Abrasion or friction burn of toenail, infected           |
| SD71000 | Abrasion of foot, infected                               |
| SD71100 | Abrasion of toe, infected                                |
| SD71z00 | Abrasion or friction burn of foot and toe, infected, NOS |
| SD73.00 | Blister of foot and toe, infected                        |
| SD73.11 | Blister of heel, infected                                |
| SD73000 | Blister of foot, infected                                |
| SD73100 | Blister of toe, infected                                 |
| SD73z00 | Blister of foot and toe, infected, NOS                   |
| SD75.00 | Insect bite, nonvenomous, of foot and toe, infected      |
| SD75.11 | Insect bite, nonvenomous, of heel, infected              |
| SD75000 | Insect bite, nonvenomous, of foot, infected              |
| SD75100 | Insect bite, nonvenomous, of toe, infected               |
| SD75z00 | Insect bite, nonvenomous, of foot and toe, infected, NOS |
| SD7z.00 | Superficial injury of foot and toe NOS, infected         |
| SD7z000 | Superficial injury of foot NOS, infected                 |
| SD7z100 | Superficial injury of toe NOS, infected                  |
| SD7zz00 | Superficial injury of foot and toe, infected, NOS        |
| SD91.00 | Abrasion or friction burn, infected, NOS                 |
| SD95.00 | Insect bite, nonvenomous, infected, NOS                  |
| SD96000 | Foreign body in skin wound                               |
| SD99.00 | Tick bite, infected                                      |
| SD9z.00 | Other superficial injury, infected, NOS                  |
| SH...00 | Burns                                                    |
| SH1..00 | Burn of the face, head or neck                           |
| SH1..11 | Face burns                                               |

|         |                                                              |
|---------|--------------------------------------------------------------|
| SH1..12 | Head burns                                                   |
| SH10.00 | Unspecified thickness burn of the face, head or neck         |
| SH10000 | Unspecified thickness burn of unspecified part of face/head  |
| SH10100 | Unspecified thickness burn of the ear                        |
| SH10200 | Unspecified thickness burn of the eye                        |
| SH10300 | Unspecified thickness burn of the lip(s)                     |
| SH10400 | Unspecified thickness burn of the chin                       |
| SH10500 | Unspecified thickness burn of the nose                       |
| SH10600 | Unspecified thickness burn of the scalp                      |
| SH10700 | Unspecified thickness burn of the forehead                   |
| SH10800 | Unspecified thickness burn of the cheek                      |
| SH10900 | Unspecified thickness burn of the neck                       |
| SH10x00 | Unspecified thickness burn multiple sites face, head or neck |
| SH10z00 | Unspecified thickness burn of the face, head or neck NOS     |
| SH11.00 | Superficial burn of the face, head or neck                   |
| SH11.11 | Erythema of head or neck, first degree burn                  |
| SH11000 | Superficial burn of unspecified part of the face or head     |
| SH11100 | Superficial burn of the ear                                  |
| SH11200 | Superficial burn of the eye                                  |
| SH11300 | Superficial burn of the lip(s)                               |
| SH11400 | Superficial burn of the chin                                 |
| SH11500 | Superficial burn of the nose                                 |
| SH11600 | Superficial burn of the scalp                                |
| SH11700 | Superficial burn of the forehead                             |
| SH11800 | Superficial burn of the cheek                                |
| SH11900 | Superficial burn of the neck                                 |
| SH11x00 | Superficial burn of multiple sites of the face, head or neck |
| SH11z00 | Superficial burn of the face, head or neck NOS               |
| SH12.00 | Partial thickness burn of the face, head or neck             |
| SH12.11 | Blister of face, head and neck, second degree burn           |
| SH12000 | Superficial part. thickness burn unspecified part face/head  |
| SH12100 | Superficial partial thickness burn of the ear                |
| SH12111 | Ear - 2nd degree burn                                        |
| SH12200 | Superficial partial thickness burn of the eye                |
| SH12211 | Eye - 2nd degree burn                                        |
| SH12300 | Superficial partial thickness burn of the lip(s)             |
| SH12311 | Lip - 2nd degree burn                                        |
| SH12400 | Superficial partial thickness burn of the chin               |
| SH12411 | Chin - 2nd degree burn                                       |
| SH12500 | Superficial partial thickness burn of the nose               |
| SH12511 | Nose - 2nd degree burn                                       |
| SH12600 | Superficial partial thickness burn of the scalp              |
| SH12611 | Scalp - 2nd degree burn                                      |
| SH12700 | Superficial partial thickness burn of the forehead           |
| SH12711 | Forehead - 2nd degree burn                                   |
| SH12800 | Superficial partial thickness burn of the cheek              |
| SH12811 | Cheek - 2nd degree burn                                      |
| SH12900 | Superficial partial thickness burn of the neck               |
| SH12911 | Neck - 2nd degree burn                                       |
| SH12A00 | Deep partial thickness burn of unspecified part of face/head |

|         |                                                              |
|---------|--------------------------------------------------------------|
| SH12B00 | Deep partial thickness burn of the ear                       |
| SH12C00 | Deep partial thickness burn of the eye                       |
| SH12D00 | Deep partial thickness burn of the lip(s)                    |
| SH12E00 | Deep partial thickness burn of the chin                      |
| SH12F00 | Deep partial thickness burn of the nose                      |
| SH12G00 | Deep partial thickness burn of the scalp                     |
| SH12H00 | Deep partial thickness burn of the forehead                  |
| SH12J00 | Deep partial thickness burn of the cheek                     |
| SH12K00 | Deep partial thickness burn of the neck                      |
| SH12x00 | Partial thickness burn of multiple sites face, head or neck  |
| SH12z00 | Partial thickness burn of the face, head or neck NOS         |
| SH13.00 | Full thickness burn of the face, head or neck                |
| SH13000 | Full thickness burn of unspecified part of the face or head  |
| SH13100 | Full thickness burn of the ear                               |
| SH13200 | Full thickness burn of the eye                               |
| SH13300 | Full thickness burn of the lip(s)                            |
| SH13400 | Full thickness burn of the chin                              |
| SH13500 | Full thickness burn of the nose                              |
| SH13600 | Full thickness burn of the scalp                             |
| SH13700 | Full thickness burn of the forehead                          |
| SH13800 | Full thickness burn of the cheek                             |
| SH13900 | Full thickness burn of the neck                              |
| SH13A00 | Corrosion of third degree of head and neck                   |
| SH13x00 | Full thickness burn of multiple sites of face, head or neck  |
| SH13z00 | Full thickness burn of the face, head or neck NOS            |
| SH14.00 | Deep full thick burn face/head/neck - without loss body part |
| SH14000 | Deep full thick burn unspec.part face/head-no loss body part |
| SH14100 | Deep full thickness burn of ear without loss of body part    |
| SH14200 | Deep full thickness burn of eye without loss of body part    |
| SH14300 | Deep full thickness burn of lip(s) without loss of body part |
| SH14400 | Deep full thickness burn of chin without loss of body part   |
| SH14500 | Deep full thickness burn of nose without loss of body part   |
| SH14600 | Deep full thickness burn of scalp without loss of body part  |
| SH14700 | Deep full thickness burn forehead without loss of body part  |
| SH14800 | Deep full thickness burn of cheek without loss of body part  |
| SH14900 | Deep full thickness burn of neck without loss of body part   |
| SH14x00 | Deep full thickness burn multip sites face/head/neck- no BPL |
| SH14z00 | Deep full thick burn, no loss body part, face/head/neck NOS  |
| SH15.00 | Deep full thick burn face/head/neck, with loss of body part  |
| SH15000 | Deep full thickness burn unspec part of face/head, with BPL  |
| SH15100 | Deep full thickness burn of the ear, with loss of body part  |
| SH15200 | Deep full thickness burn of the eye, with loss of body part  |
| SH15300 | Deep full thickness burn of lip(s), with loss of body part   |
| SH15400 | Deep full thickness burn of the chin, with loss of body part |
| SH15500 | Deep full thickness burn of the nose, with loss of body part |
| SH15600 | Deep full thickness burn of scalp, with loss of body part    |
| SH15700 | Deep full thickness burn of forehead, with loss of body part |
| SH15800 | Deep full thickness burn of cheek, with loss of body part    |
| SH15900 | Deep full thickness burn of the neck, with loss of body part |
| SH15x00 | Deep full thick burn multip parts face/head/neck - with BPL  |

|         |                                                              |
|---------|--------------------------------------------------------------|
| SH15z00 | Deep full thick burn, with loss body part,face/head/neck NOS |
| SH16.00 | Corrosion of head and neck                                   |
| SH16000 | Corrosion of first degree of head and neck                   |
| SH16100 | Corrosion of second degree of head and neck                  |
| SH1z.00 | Burn of the face, head or neck NOS                           |
| SH2..00 | Burn of the trunk                                            |
| SH20.00 | Unspecified thickness burn of the trunk                      |
| SH20000 | Unspecified thickness burn of unspecified part of the trunk  |
| SH20100 | Unspecified thickness burn of the breast                     |
| SH20200 | Unspecified thickness burn of the chest wall                 |
| SH20300 | Unspecified thickness burn of the abdominal wall             |
| SH20400 | Unspecified thickness burn of the back (excluding buttock)   |
| SH20500 | Unspecified thickness burn of the buttock                    |
| SH20600 | Unspecified thickness burn of the genitalia                  |
| SH20x00 | Unspecified thickness burn of multiple sites of the trunk    |
| SH20z00 | Unspecified thickness burn of the trunk NOS                  |
| SH21.00 | Superficial burn of the trunk                                |
| SH21.11 | Erythema of trunk, 1st degree burn                           |
| SH21000 | Superficial burn of unspecified part of the trunk            |
| SH21100 | Superficial burn of the breast                               |
| SH21200 | Superficial burn of the chest wall                           |
| SH21300 | Superficial burn of the abdominal wall                       |
| SH21400 | Superficial burn of the back (excluding buttock)             |
| SH21500 | Superficial burn of the buttock                              |
| SH21600 | Superficial burn of the genitalia                            |
| SH21700 | Corrosion of first degree of trunk                           |
| SH21x00 | Superficial burn of multiple sites of the trunk              |
| SH21z00 | Superficial burn of the trunk NOS                            |
| SH22.00 | Partial thickness burn of the trunk                          |
| SH22.11 | Blister of trunk, second degree burn                         |
| SH22000 | Superficial partial thickness burn unspecified part of trunk |
| SH22100 | Superficial partial thickness burn of the breast             |
| SH22200 | Superficial partial thickness burn of the chest wall         |
| SH22300 | Superficial partial thickness burn of the abdominal wall     |
| SH22400 | Superficial partial thickness burn of back (excl buttock)    |
| SH22500 | Superficial partial thickness burn of the buttock            |
| SH22600 | Superficial partial thickness burn of the genitalia          |
| SH22700 | Deep partial thickness burn of the trunk, unspecified        |
| SH22800 | Deep partial thickness burn of the breast                    |
| SH22900 | Deep partial thickness burn of the chest wall                |
| SH22A00 | Deep partial thickness burn of the abdominal wall            |
| SH22B00 | Deep partial thickness burn of the back (excluding buttock)  |
| SH22C00 | Deep partial thickness burn of the buttock                   |
| SH22D00 | Deep partial thickness burn of the genitalia                 |
| SH22E00 | Corrosion of second degree of trunk                          |
| SH22x00 | Partial thickness burn of multiple sites of the trunk        |
| SH22z00 | Partial thickness burn of the trunk NOS                      |
| SH23.00 | Full thickness burn of the trunk                             |
| SH23000 | Full thickness burn of the trunk, unspecified                |
| SH23100 | Full thickness burn of the breast                            |

|         |                                                              |
|---------|--------------------------------------------------------------|
| SH23200 | Full thickness burn of the chest wall                        |
| SH23300 | Full thickness burn of the abdominal wall                    |
| SH23400 | Full thickness burn of the back (excluding buttock)          |
| SH23500 | Full thickness burn of the buttock                           |
| SH23600 | Full thickness burn of the genitalia                         |
| SH23700 | Corrosion of third degree of trunk                           |
| SH23x00 | Full thickness burn of multiple sites of the trunk           |
| SH23z00 | Full thickness burn of the trunk NOS                         |
| SH24.00 | Deep full thickness burn of trunk without loss of body part  |
| SH24000 | Deep full thickness burn of trunk unsp, no loss of body part |
| SH24100 | Deep full thickness burn of breast without loss of body part |
| SH24200 | Deep full thickness burn of chest without loss of body part  |
| SH24300 | Deep full thickness burn of abdom.wall, no loss of body part |
| SH24400 | Deep full thickness burn of back without loss of body part   |
| SH24500 | Deep full thickness burn of buttock, no loss of body part    |
| SH24600 | Deep full thickness burn of genitalia, no loss of body part  |
| SH24x00 | Deep full thickness burn multiple sites trunk, no BPL        |
| SH24z00 | Deep full thickness burn of trunk, no loss of body part NOS  |
| SH25.00 | Deep full thickness burn of trunk, with loss of body part    |
| SH25000 | Deep full thickness burn of trunk unsp, with loss body part  |
| SH25100 | Deep full thickness burn of breast, with loss of body part   |
| SH25200 | Deep full thickness burn of chest, with loss of body part    |
| SH25300 | Deep full thickness burn of abd.wall, with loss of body part |
| SH25400 | Deep full thickness burn of back, with loss of body part     |
| SH25500 | Deep full thickness burn of buttock, with loss of body part  |
| SH25600 | Deep full thickness burn of genitalia, with loss body part   |
| SH25x00 | Deep full thickness burn multiple sites trunk with BPL       |
| SH25z00 | Deep full thickness burn of trunk, with loss body part, NOS  |
| SH26.00 | Corrosion of unspecified degree of trunk                     |
| SH2z.00 | Burn of the trunk NOS                                        |
| SH3..00 | Burn of the arm (excluding wrist and hand)                   |
| SH30.00 | Unspecified thickness burn of the arm                        |
| SH30000 | Unspecified thickness burn of the arm, unspecified           |
| SH30100 | Unspecified thickness burn of the forearm                    |
| SH30200 | Unspecified thickness burn of the elbow                      |
| SH30300 | Unspecified thickness burn of the upper arm                  |
| SH30400 | Unspecified thickness burn of the axilla                     |
| SH30500 | Unspecified thickness burn of the shoulder                   |
| SH30600 | Unspecified thickness burn of the scapular region            |
| SH30x00 | Unspecified thickness burn of multiple sites of the arm      |
| SH30z00 | Unspecified thickness burn of the arm NOS                    |
| SH31.00 | Superficial burn of the arm                                  |
| SH31.11 | Erythema of arm, first degree burn                           |
| SH31000 | Superficial burn of the arm, unspecified                     |
| SH31100 | Superficial burn of the forearm                              |
| SH31200 | Superficial burn of the elbow                                |
| SH31300 | Superficial burn of the upper arm                            |
| SH31400 | Superficial burn of the axilla                               |
| SH31500 | Superficial burn of the shoulder                             |
| SH31600 | Superficial burn of the scapular region                      |



|         |                                                               |
|---------|---------------------------------------------------------------|
| SH31x00 | Superficial burn of multiple sites of the arm                 |
| SH31z00 | Superficial burn of the arm NOS                               |
| SH32.00 | Partial thickness burn of the arm                             |
| SH32.11 | Blister of arm, second degree burn                            |
| SH32000 | Superficial partial thickness burn of the arm, unspecified    |
| SH32100 | Superficial partial thickness burn of the forearm             |
| SH32200 | Superficial partial thickness burn of the elbow               |
| SH32300 | Superficial partial thickness burn of the upper arm           |
| SH32400 | Superficial partial thickness burn of the axilla              |
| SH32500 | Superficial partial thickness burn of the shoulder            |
| SH32600 | Superficial partial thickness burn of scapular region         |
| SH32700 | Deep partial thickness burn of the arm, unspecified           |
| SH32800 | Deep partial thickness burn of the forearm                    |
| SH32900 | Deep partial thickness burn of the elbow                      |
| SH32A00 | Deep partial thickness burn of the upper arm                  |
| SH32B00 | Deep partial thickness burn of the axilla                     |
| SH32C00 | Deep partial thickness burn of the shoulder                   |
| SH32D00 | Deep partial thickness burn of the scapular region            |
| SH32x00 | Partial thickness burn of multiple sites of the arm           |
| SH32z00 | Partial thickness burn of the arm NOS                         |
| SH33.00 | Full thickness burn of the arm                                |
| SH33000 | Full thickness burn of the arm, unspecified                   |
| SH33100 | Full thickness burn of the forearm                            |
| SH33200 | Full thickness burn of the elbow                              |
| SH33300 | Full thickness burn of the upper arm                          |
| SH33400 | Full thickness burn of the axilla                             |
| SH33500 | Full thickness burn of the shoulder                           |
| SH33600 | Full thickness burn of the scapular region                    |
| SH33x00 | Full thickness burn of multiple sites of the arm              |
| SH33z00 | Full thickness burn of the arm NOS                            |
| SH34.00 | Deep full thickness burn of arm without loss of body part     |
| SH34000 | Deep full thickness burn of arm unsp, no loss of body part    |
| SH34100 | Deep full thickness burn of forearm, no loss of body part     |
| SH34200 | Deep full thickness burn of elbow without loss of body part   |
| SH34300 | Deep full thickness burn of upper arm, no loss of body part   |
| SH34400 | Deep full thickness burn of axilla without loss of body part  |
| SH34500 | Deep full thickness burn of shoulder, no loss of body part    |
| SH34600 | Deep full thickness burn of scapular, no loss of body part    |
| SH34x00 | Deep full thickness burn of multiple sites of arm, no BPL     |
| SH34z00 | Deep full thickness burn without loss of body part-arm NOS    |
| SH35.00 | Deep full thickness burn of arm, with loss of body part       |
| SH35000 | Deep full thickness burn of arm unsp, with loss of body part  |
| SH35100 | Deep full thickness burn of forearm, with loss of body part   |
| SH35200 | Deep full thickness burn of elbow, with loss of body part     |
| SH35300 | Deep full thickness burn of upper arm, with loss of body part |
| SH35400 | Deep full thickness burn of axilla, with loss of body part    |
| SH35500 | Deep full thickness burn of shoulder, with loss of body part  |
| SH35600 | Deep full thickness burn of scapular, with loss of body part  |
| SH35x00 | Deep full thickness burn of multiple sites of arm with BPL    |
| SH35z00 | Deep full thickness burn-, with loss of body part-arm NOS     |

|         |                                                             |
|---------|-------------------------------------------------------------|
| SH36.00 | Corros/unspecf degree/shoulder+upper limb,except wrist+hand |
| SH36000 | Corrosion/1st degree shoulder+upper limb,except wrist+hand  |
| SH36100 | Corrosion/2nd degree/shoulder and upper limb exc wrist+hand |
| SH36200 | Corros/third degree/shoulder and upper limb, exc wrist+hand |
| SH3z.00 | Burn of the arm (excluding wrist and hand) NOS              |
| SH4..00 | Burn of the wrist(s) and hand(s)                            |
| SH40.00 | Unspecified thickness burn of the wrist and hand            |
| SH40.11 | Unspecified degree burn of finger                           |
| SH40.12 | Unspecified degree burn of hand                             |
| SH40.13 | Unspecified degree burn of thumb                            |
| SH40.14 | Unspecified degree burn of wrist                            |
| SH40000 | Unspecified thickness burn of the hand, unspecified         |
| SH40100 | Unspecified thickness burn of a single finger               |
| SH40200 | Unspecified thickness burn of the thumb                     |
| SH40300 | Unspecified thickness burn of more than one finger          |
| SH40400 | Unspecified thickness burn of the thumb and finger(s)       |
| SH40500 | Unspecified thickness burn of the palm of hand              |
| SH40600 | Unspecified thickness burn of the back of hand              |
| SH40700 | Unspecified thickness burn of the wrist                     |
| SH40x00 | Unspecified thickness burn of multiple sites of wrist/hand  |
| SH40z00 | Unspecified thickness burn of the wrist or hand NOS         |
| SH41.00 | Superficial burn of the wrist and hand                      |
| SH41.11 | Erythema of wrist and hand,first degree burn                |
| SH41.12 | First degree burn of finger                                 |
| SH41.13 | First degree burn of hand                                   |
| SH41.14 | First degree burn of thumb                                  |
| SH41.15 | First degree burn of wrist                                  |
| SH41000 | Superficial burn of the hand, unspecified                   |
| SH41100 | Superficial burn of a single finger                         |
| SH41200 | Superficial burn of the thumb                               |
| SH41300 | Superficial burn of more than one finger                    |
| SH41400 | Superficial burn of the thumb and finger(s)                 |
| SH41500 | Superficial burn of the palm of hand                        |
| SH41600 | Superficial burn of the back of hand                        |
| SH41700 | Superficial burn of the wrist                               |
| SH41x00 | First degree burn of multiple sites of the wrist or hand    |
| SH41z00 | Superficial burn of the wrist or hand NOS                   |
| SH42.00 | Partial thickness burn of the wrist and hand                |
| SH42.11 | Blister of wrist and hand, second degree burn               |
| SH42.12 | Second degree burn of finger                                |
| SH42.13 | Second degree burn of hand                                  |
| SH42.14 | Second degree burn of thumb                                 |
| SH42.15 | Second degree burn of wrist                                 |
| SH42000 | Superficial partial thickness burn of hand, unspecified     |
| SH42100 | Superficial partial thickness burn of a single finger       |
| SH42200 | Superficial partial thickness burn of the thumb             |
| SH42300 | Superficial partial thickness burn of more than one finger  |
| SH42400 | Superficial partial thickness burn of thumb and finger(s)   |
| SH42500 | Superficial partial thickness burn of palm of hand          |
| SH42600 | Superficial partial thickness burn of back of hand          |

|         |                                                               |
|---------|---------------------------------------------------------------|
| SH42700 | Superficial partial thickness burn of the wrist               |
| SH42800 | Deep partial thickness burn of the hand, unspecified          |
| SH42900 | Deep partial thickness burn of a single finger                |
| SH42A00 | Deep partial thickness burn of the thumb                      |
| SH42B00 | Deep partial thickness burn of more than one finger           |
| SH42C00 | Deep partial thickness burn of the thumb and finger(s)        |
| SH42D00 | Deep partial thickness burn of the palm of hand               |
| SH42E00 | Deep partial thickness burn of back of hand                   |
| SH42F00 | Deep partial thickness burn of wrist                          |
| SH42x00 | Partial thickness burn of multiple sites of the wrist/hand    |
| SH42z00 | Partial thickness burn of the wrist or hand NOS               |
| SH43.00 | Full thickness burn of the wrist and hand                     |
| SH43.11 | Third degree burn of finger                                   |
| SH43.12 | Third degree burn of hand                                     |
| SH43.13 | Third degree burn of thumb                                    |
| SH43.14 | Third degree burn of wrist                                    |
| SH43000 | Full thickness burn of the hand, unspecified                  |
| SH43100 | Full thickness burn of a single finger                        |
| SH43200 | Full thickness burn of the thumb                              |
| SH43300 | Full thickness burn of more than one finger                   |
| SH43400 | Full thickness burn of the thumb and finger(s)                |
| SH43500 | Full thickness burn of the palm of hand                       |
| SH43600 | Full thickness burn of the back of hand                       |
| SH43700 | Full thickness burn of the wrist                              |
| SH43x00 | Full thickness burn of multiple sites of the wrist or hand    |
| SH43z00 | Full thickness burn of the wrist or hand NOS                  |
| SH44.00 | Deep full thickness burn of wrist/hand, no loss of body part  |
| SH44.11 | Deep third degree burn of finger, without loss of a body part |
| SH44.12 | Deep third degree burn of hand, without loss of a body part   |
| SH44.13 | Deep third degree burn of thumb, without loss of a body part  |
| SH44.14 | Deep third degree burn of wrist, without loss of a body part  |
| SH44000 | Deep full thickness burn of hand unsp, no loss of body part   |
| SH44100 | Deep full thickness burn of a finger, no loss of body part    |
| SH44200 | Deep full thickness burn of thumb without loss of body part   |
| SH44300 | Deep full thickness burn of >1 finger, no loss of body part   |
| SH44400 | Deep full thickness burn of thumb+fing, no loss of body part  |
| SH44500 | Deep full thickness burn of palm hand, no loss of body part   |
| SH44600 | Deep full thickness burn of back hand, no loss of body part   |
| SH44700 | Deep full thickness burn of wrist without loss of body part   |
| SH44x00 | Deep full thickness burn-multiple sites wrist/hand, no BPL    |
| SH44z00 | Deep full thickness burn of wrist/hand, no loss body part NOS |
| SH45.00 | Deep full thickness burn of wrist/hand, with loss body part   |
| SH45.11 | Deep third degree burn of finger with loss of a body part     |
| SH45.12 | Deep third degree burn of hand with loss of a body part       |
| SH45.13 | Deep third degree burn of thumb with loss of a body part      |
| SH45.14 | Deep third degree burn of wrist with loss of a body part      |
| SH45000 | Deep full thickness burn of hand unsp, with loss body part    |
| SH45100 | Deep full thickness burn of a finger, with loss of body part  |
| SH45200 | Deep full thickness burn of thumb, with loss of body part     |
| SH45300 | Deep full thickness burn of >1 finger, with loss body part    |

|         |                                                              |
|---------|--------------------------------------------------------------|
| SH45400 | Deep full thickness burn of thumb+fing, with loss body part  |
| SH45500 | Deep full thickness burn of palm hand, with loss body part   |
| SH45600 | Deep full thickness burn of back hand, with loss body part   |
| SH45700 | Deep full thickness burn of wrist, with loss of body part    |
| SH45x00 | Deep full thickness burn-multiple sites wrist/hand with BPL  |
| SH45z00 | Deep full thickness burn wrist/hand, with loss body part NOS |
| SH46.00 | Corrosion of wrist and hand                                  |
| SH46000 | Corrosion of first degree of wrist and hand                  |
| SH46100 | Corrosion of second degree of wrist and hand                 |
| SH46200 | Corrosion of third degree of wrist and hand                  |
| SH4z.00 | Burn of wrist or hand NOS                                    |
| SH5..00 | Burn of lower limbs                                          |
| SH5..11 | Leg burns                                                    |
| SH50.00 | Unspecified thickness burn of the leg                        |
| SH50000 | Unspecified degree burn of the leg, unspecified              |
| SH50100 | Unspecified thickness burn of the toe(s)                     |
| SH50200 | Unspecified thickness burn of the foot                       |
| SH50300 | Unspecified thickness burn of the ankle                      |
| SH50400 | Unspecified thickness burn of the lower leg                  |
| SH50500 | Unspecified thickness burn of the knee                       |
| SH50600 | Unspecified thickness burn of the thigh                      |
| SH50x00 | Unspecified thickness burn of multiple sites of the leg      |
| SH50z00 | Unspecified thickness burn of the leg NOS                    |
| SH51.00 | Superficial burn of the leg                                  |
| SH51.11 | Erythema of leg, first degree burn                           |
| SH51000 | Superficial burn of the leg, unspecified                     |
| SH51100 | Superficial burn of the toe(s)                               |
| SH51200 | Superficial burn of the foot                                 |
| SH51300 | Superficial burn of the ankle                                |
| SH51400 | Superficial burn of the lower leg                            |
| SH51500 | Superficial burn of the knee                                 |
| SH51600 | Superficial burn of the thigh                                |
| SH51x00 | Superficial burn of multiple sites of the leg                |
| SH51z00 | Superficial burn of the leg NOS                              |
| SH52.00 | Partial thickness burn of the leg                            |
| SH52.11 | Blister of leg, second degree burn                           |
| SH52000 | Superficial partial thickness burn of the leg, unspecified   |
| SH52100 | Superficial partial thickness burn of the toe(s)             |
| SH52200 | Superficial partial thickness burn of the foot               |
| SH52300 | Superficial partial thickness burn of the ankle              |
| SH52400 | Superficial partial thickness burn of the lower leg          |
| SH52500 | Superficial partial thickness burn of the knee               |
| SH52600 | Superficial partial thickness burn of the thigh              |
| SH52700 | Deep partial thickness burn of the leg, unspecified          |
| SH52800 | Deep partial thickness burn of the toe(s)                    |
| SH52900 | Deep partial thickness burn of the foot                      |
| SH52A00 | Deep partial thickness burn of the ankle                     |
| SH52B00 | Deep partial thickness burn of the lower leg                 |
| SH52C00 | Deep partial thickness burn of the knee                      |
| SH52D00 | Deep partial thickness burn of the thigh                     |

|         |                                                              |
|---------|--------------------------------------------------------------|
| SH52x00 | Partial thickness burn of multiple sites of the leg          |
| SH52z00 | Partial thickness burn of the leg NOS                        |
| SH53.00 | Full thickness burn of the leg                               |
| SH53000 | Full thickness burn of the leg, unspecified                  |
| SH53100 | Full thickness burn of the toe(s)                            |
| SH53200 | Full thickness burn of the foot                              |
| SH53300 | Full thickness burn of the ankle                             |
| SH53400 | Full thickness burn of the lower leg                         |
| SH53500 | Full thickness burn of the knee                              |
| SH53600 | Full thickness burn of the thigh                             |
| SH53x00 | Full thickness burn of multiple sites of the leg             |
| SH53z00 | Full thickness burn of the leg NOS                           |
| SH54.00 | Deep full thickness burn of leg without loss of body part    |
| SH54000 | Deep full thickness burn of leg unsp, no loss of body part   |
| SH54100 | Deep full thickness burn of toe(s) without loss of body part |
| SH54200 | Deep full thickness burn of foot without loss of body part   |
| SH54300 | Deep full thickness burn of ankle without loss of body part  |
| SH54400 | Deep full thickness burn of lower leg without loss of body   |
| SH54500 | Deep full thickness burn of knee without loss of body part   |
| SH54600 | Deep full thickness burn of thigh without loss of body part  |
| SH54x00 | Deep full thickness burn-mult.leg without loss of body part  |
| SH54z00 | Deep full thickness burn, no loss of body part, of leg NOS   |
| SH55.00 | Deep full thickness burn of leg, with loss of body part      |
| SH55000 | Deep full thickness burn of leg unsp, with loss body part    |
| SH55100 | Deep full thickness burn of toe(s), with loss of body part   |
| SH55200 | Deep full thickness burn of foot, with loss of body part     |
| SH55300 | Deep full thickness burn of ankle, with loss of body part    |
| SH55400 | Deep full thickness burn of lower leg, with loss body part   |
| SH55500 | Deep full thickness burn of knee, with loss of body part     |
| SH55600 | Deep full thickness burn of thigh, with loss of body part    |
| SH55x00 | Deep full thickness burn-mult.leg, with loss of body part    |
| SH55z00 | Deep full thickness burn, with loss of body part, of leg NOS |
| SH56.00 | Burn and corrosion of hip and lower limb,except ankle & foot |
| SH56000 | Corrosion of first degree of hip+lower limb,exc ankle + foot |
| SH56100 | Corrosion/2nd degree/hip+lower limb,except ankle & foot      |
| SH56200 | Corrosion/third degree/hip+lower limb except ankle and foot  |
| SH57.00 | Corrosion of ankle and foot                                  |
| SH57000 | Corrosion of first degree of ankle and foot                  |
| SH57100 | Corrosion of second degree of ankle and foot                 |
| SH57200 | Corrosion of third degree of ankle and foot                  |
| SH5z.00 | Burn of the lower limb NOS                                   |
| SH6..00 | Burn of multiple specified sites                             |
| SH60.00 | Unspecified thickness burn of multiple specified sites       |
| SH61.00 | Superficial burn of multiple specified sites                 |
| SH62.00 | Partial thickness burn of multiple specified sites           |
| SH62000 | Superficial partial thickness burn multiple specified sites  |
| SH62100 | Deep partial thickness burn of multiple specified sites      |
| SH63.00 | Full thickness burn of multiple specified sites              |
| SH64.00 | Deep full thickness burn multiple specified sites, no BPL    |
| SH65.00 | Deep full thickness burn multiple specified sites, with BPL  |

|         |                                                              |
|---------|--------------------------------------------------------------|
| SH66.00 | Corrosions of multiple regions, unspecified degree           |
| SH66000 | Corros/multiple reg,no more than first-deg corros mentioned  |
| SH66100 | Corrosion/multi reg,no more than second-deg corros mentioned |
| SH66300 | Corros/multi reg,at least one corros/third degree mentioned  |
| SH6z.00 | Burn of multiple specified sites NOS                         |
| SH8.00  | Burns as a percentage of body surface (BS) involved          |
| SH80.00 | Burn involving <10% of body surface (BS)                     |
| SH80000 | Burn:<10% of body surface, 10%/unspec BS full thickness      |
| SH80100 | Corrosions involving less than 10% of body surface           |
| SH80z00 | Burn:<10% of body surface NOS                                |
| SH81.00 | Burn involving 10-19% of body surface (BS)                   |
| SH81000 | Burn: 10-14% of body surface,<10%/unsp BS full thickness     |
| SH81100 | Burn: 10-14% of body surface, 10-14% BS full thickness       |
| SH81200 | Burn: 15-19% of body surface,<10%/unsp BS full thickness     |
| SH81300 | Burn: 15-19% of body surface, 10-19% BS full thickness       |
| SH81400 | Corrosions involving 10-19% of body surface                  |
| SH81z00 | Burn: 10-19% of body surface NOS                             |
| SH82.00 | Burn involving 20-29% of body surface (BS)                   |
| SH82000 | Burn: 20-29% of body surface,<10%/unspec BS full thickness   |
| SH82100 | Burn: 20-29% of body surface, 10-19% BS full thickness       |
| SH82200 | Burn: 20-29% of body surface, 20-29% BS full thickness       |
| SH82300 | Corrosions involving 20-29% of body surface                  |
| SH82z00 | Burn: 20-29% of body surface NOS                             |
| SH83.00 | Burn involving 30-39% of body surface (BS)                   |
| SH83000 | Burn: 30-39% of body surface,<10%/unspec BS full thickness   |
| SH83100 | Burn: 30-39% of body surface, 10-19% BS full thickness       |
| SH83200 | Burn: 30-39% of body surface, 20-29% BS full thickness       |
| SH83300 | Burn: 30-39% of body surface, 30-39% BS full thickness       |
| SH83400 | Corrosions involving 30-39% of body surface                  |
| SH83z00 | Burn: 30-39% of body surface NOS                             |
| SH84.00 | Burn involving 40-49% of body surface (BS)                   |
| SH84000 | Burn: 40-49% of body surface,<10%/unspec BS full thickness   |
| SH84100 | Burn: 40-49% of body surface, 10-19% BS full thickness       |
| SH84200 | Burn: 40-49% of body surface, 20-29% BS full thickness       |
| SH84300 | Burn: 40-49% of body surface, 30-39% BS full thickness       |
| SH84400 | Burn: 40-49% of body surface, 40-49% BS full thickness       |
| SH84500 | Corrosions involving 40-49% of body surface                  |
| SH84z00 | Burn: 40-49% of body surface NOS                             |
| SH85.00 | Burn involving 50-59% of body surface (BS)                   |
| SH85000 | Burn: 50-59% of body surface,<10%/unspec BS full thickness   |
| SH85100 | Burn: 50-59% of body surface, 10-19% BS full thickness       |
| SH85200 | Burn: 50-59% of body surface, 20-29% BS full thickness       |
| SH85300 | Burn: 50-59% of body surface, 30-39% BS full thickness       |
| SH85400 | Burn: 50-59% of body surface, 40-49% BS full thickness       |
| SH85500 | Burn: 50-59% of body surface, 50-59% BS full thickness       |
| SH85600 | Corrosions involving 50-59% of body surface                  |
| SH85z00 | Burn: 50-59% of body surface NOS                             |
| SH86.00 | Burn involving 60-69% of body surface (BS)                   |
| SH86000 | Burn: 60-69% of body surface,<10%/unspec BS full thickness   |
| SH86100 | Burn: 60-69% of body surface, 10-19% BS full thickness       |

|         |                                                             |
|---------|-------------------------------------------------------------|
| SH86200 | Burn: 60-69% of body surface, 20-29% BS full thickness      |
| SH86300 | Burn: 60-69% of body surface, 30-39% BS full thickness      |
| SH86400 | Burn: 60-69% of body surface, 40-49% BS full thickness      |
| SH86500 | Burn: 60-69% of body surface, 50-59% BS full thickness      |
| SH86600 | Burn: 60-69% of body surface, 60-69% BS full thickness      |
| SH86700 | Corrosions involving 60-69% of body surface                 |
| SH86z00 | Burn: 60-69% of body surface NOS                            |
| SH87.00 | Burn involving 70-79% of body surface (BS)                  |
| SH87000 | Burn: 70-79% of body surface, <10%/unspec BS full thickness |
| SH87100 | Burn: 70-79% of body surface, 10-19% BS full thickness      |
| SH87200 | Burn: 70-79% of body surface, 20-29% BS full thickness      |
| SH87300 | Burn: 70-79% of body surface, 30-39% BS full thickness      |
| SH87400 | Burn: 70-79% of body surface, 40-49% BS full thickness      |
| SH87500 | Burn: 70-79% of body surface, 50-59% BS full thickness      |
| SH87600 | Burn: 70-79% of body surface, 60-69% BS full thickness      |
| SH87700 | Burn: 70-79% of body surface, 70-79% BS full thickness      |
| SH87800 | Corrosions involving 70-79% of body surface                 |
| SH87z00 | Burn: 70-79% of body surface NOS                            |
| SH88.00 | Burn involving 80-89% of body surface (BS)                  |
| SH88000 | Burn: 80-89% of body surface, <10%/unspec BS full thickness |
| SH88100 | Burn: 80-89% of body surface, 10-19% =full thickness        |
| SH88200 | Burn: 80-89% of body surface, 20-29% BS full thickness      |
| SH88300 | Burn: 80-89% of body surface, 30-39% BS full thickness      |
| SH88400 | Burn: 80-89% of body surface, 40-49% BS full thickness      |
| SH88500 | Burn: 80-89% of body surface, 50-59% BS full thickness      |
| SH88600 | Burn: 80-89% of body surface, 60-69% BS full thickness      |
| SH88700 | Burn: 80-89% of body surface, 70-79% BS full thickness      |
| SH88800 | Burn: 80-89% of body surface, 80-89% BS full thickness      |
| SH88900 | Corrosions involving 80-89% of body surface                 |
| SH88z00 | Burn: 80-89% of body surface, NOS                           |
| SH89.00 | Burn involving >90% of body surface (BS)                    |
| SH89000 | Burn: >90% of body surface, <10%/unspec BS full thickness   |
| SH89100 | Burn: >90% of body surface, 10-19% BS full thickness        |
| SH89200 | Burn: >90% of body surface, 20-29% BS full thickness        |
| SH89300 | Burn: >90% of body surface, 30-39% BS full thickness        |
| SH89400 | Burn: >90% of body surface, 40-49% BS full thickness        |
| SH89500 | Burn: >90% of body surface, 50-59% BS full thickness        |
| SH89600 | Burn: >90% of body surface, 60-69% BS full thickness        |
| SH89700 | Burn: >90% of body surface, 70-79% BS full thickness        |
| SH89800 | Burn: >90% of body surface, 80-89% BS full thickness        |
| SH89900 | Burn: >90% of body surface, >90% BS full thickness          |
| SH89A00 | Corrosions involving 90% or more of body surface            |
| SH89z00 | Burn: >90% of body surface NOS                              |
| SH8z.00 | Burn as a percentage of body surface involved NOS           |
| SH9..00 | Burn - unspecified                                          |
| SH90.00 | Unspecified degree of burn NOS                              |
| SH91.00 | Superficial burn NOS                                        |
| SH91.11 | First degree burn                                           |
| SH92.00 | Partial thickness burn NOS                                  |
| SH92.11 | Second degree burn                                          |

|         |                                                              |
|---------|--------------------------------------------------------------|
| SH92000 | Superficial partial thickness burn NOS                       |
| SH92100 | Deep partial thickness burn NOS                              |
| SH93.00 | Full thickness burn NOS                                      |
| SH93.11 | Third degree burn                                            |
| SH94.00 | Deep full thickness burn, without loss of body part, NOS     |
| SH95.00 | Deep full thickness burn, with loss of body part, NOS        |
| SH9z.00 | Burn - unspecified                                           |
| SHz..00 | Burns NOS                                                    |
| SK03.00 | Post-traumatic wound infection NEC                           |
| SK1x200 | Multiple open wounds of neck                                 |
| SK1x500 | Multiple open wounds of abdomen, lower back and pelvis       |
| SK1x700 | Multiple open wounds of forearm                              |
| SK1x800 | Multiple open wounds of lower leg                            |
| SK1x900 | Open wounds involv thorax with abdomen,lwr back and pelvis   |
| SK1xA00 | Open wounds invol multi regions of up limb(s) wth lw limb(s) |
| SP23.00 | Operation wound disruption                                   |
| SP23000 | Operation wound dehiscence                                   |
| SP23011 | Postoperative wound breakdown                                |
| SP23100 | Operation wound rupture                                      |
| SP23200 | Surgical wound necrosis                                      |
| SP23300 | Burst abdomen NEC                                            |
| SP23400 | Breakdown of totally implantable venous access device port   |
| SP23z00 | Operation wound disruption NOS                               |
| SP23z11 | Delayed healing surgical wound                               |
| SP23z12 | Healing delayed surgical wound                               |
| SP23z13 | Wound surgical healing delayed                               |
| SP24300 | Foreign body left in wound                                   |
| SP25000 | Postoperative stitch abscess                                 |
| SP25100 | Postoperative wound abscess                                  |
| SP25500 | Postoperative wound infection, unspecified                   |
| SP25600 | Postoperative wound infection-deep                           |
| SP25700 | Postoperative wound infection-superficial                    |
| SP25800 | MRSA infection of postoperative wound                        |
| SP28.00 | Postoperative wound sinus                                    |
| SQ...00 | Open wounds involving multiple body regions                  |
| Syu0200 | [X]Open wound of other parts of head                         |
| Syu0A00 | [X]Penetrating wound of orbit with or without foreign body   |
| Syu1300 | [X]Open wound of other parts of the neck                     |
| Syu1400 | [X]Open wound of neck, part unspecified                      |
| Syu2500 | [X]Open wound of other parts of thorax                       |
| Syu2600 | [X]Open wound of thorax, part unspecified                    |
| Syu3200 | [X]Open wound of oth and unspecif external genital organs    |
| Syu3300 | [X]Open wound oth & unspecif part abdomen/lower back/pelvis  |
| Syu4100 | [X]Open wound of oth & unspecif parts of should & upper arm  |
| Syu5200 | [X]Open wound of other parts of forearm                      |
| Syu6200 | [X]Open wound of other parts of wrist and hand               |
| Syu7100 | [X]Open wound of other parts of hip and thigh                |
| Syu8200 | [X]Open wound of other parts of lower leg                    |
| Syu9200 | [X]Open wound of other parts of foot                         |
| Syu9300 | [X]Open wound of other parts of ankle and foot               |



|         |                                                              |
|---------|--------------------------------------------------------------|
| SyuA100 | [X]Open wounds involving other combinations of body regions  |
| SyuBA00 | [X]Open wound of unspecified body region                     |
| SyuD.00 | [X]Burns and corrosions                                      |
| SyuD000 | [X]Burns of other parts of eye and adnexa                    |
| SyuD800 | [X]Burns of mult reg, at least 1 burn of 3rd deg mentioned   |
| SyuD900 | [X]Corrosn multi reg, at least 1 corr of 3rd deg mentioned   |
| SyuJ000 | [X]Post-traumatic wound infection, not elsewhere classified  |
| TG80000 | Accidental burning/scalding caused by boiling water, unspec  |
| TG80100 | Accidental burning/scalding caused by boiling liquid, unspec |
| TG80200 | Accidental burning or scalding caused by liquid metal        |
| TG80300 | Accidental burning or scalding caused by steam               |
| TG80400 | Accidental burning/scalding by boiling water from kettle     |
| TG80500 | Accidental burning/scalding by boiling water from saucepan   |
| TG80600 | Accidental burning or scalding caused by tea                 |
| TG80700 | Accidental burning or scalding caused by coffee              |
| TG80800 | Accidental burning or scalding caused by chocolate           |
| TG80900 | Accidental burning or scalding caused by milk                |
| TG80A00 | Accidental burning/scalding caused by soup, stew or curries  |
| TG80B00 | Accidental burning or scalding caused by fat                 |
| TG80C00 | Accidental burning or scalding caused by steam from kettle   |
| TG80D00 | Accidental burning or scalding by steam from car radiator    |
| TG80y00 | Accidental burning or scalding caused by other hot vapour    |
| TG80z00 | Accidental burning/scalding caused by hot liquid/vapour NOS  |
| TGyz700 | Accidental wound NOS                                         |
| Z174M00 | Pressure area care                                           |
| Z174M11 | PAC - Pressure area care                                     |
| Z174N00 | Wound care                                                   |
| Z174N11 | WOUND TREATMENT                                              |
| Z174N12 | WOUND THERAPY                                                |
| Z174O00 | Post-surgical wound care                                     |
| Z174O11 | Post-operative wound care                                    |
| Z174P00 | Pressure sore care                                           |
| Z174Q00 | Skin ulcer care                                              |
| Z1B..00 | Dressing of skin or wound                                    |
| Z1B..11 | Application of dressing                                      |
| Z1B..12 | Dressing                                                     |
| Z1B1.00 | Attention to dressing of skin                                |
| Z1B1100 | Checking dressing of skin                                    |
| Z1B1200 | Checking dressing for leakage                                |
| Z1B1300 | Change of dressing                                           |
| Z1B1311 | Repeating dressing                                           |
| Z1B1312 | Reapplying a fresh dressing                                  |
| Z1B1313 | Redressing wound                                             |
| Z1B1400 | Attention to dressing of burnt skin                          |
| Z1B2.00 | Dressing of skin                                             |
| Z1B2100 | Dressing of burnt skin                                       |
| Z1B2111 | Burn dressing                                                |
| Z1B2200 | Covering burnt skin with plastic bag                         |
| Z1B2300 | Dressing of skin ulcer                                       |
| Z1B3.00 | Dressing of pressure sore                                    |

|         |                                         |
|---------|-----------------------------------------|
| Z1O6100 | Exposing wound to air                   |
| Z1R2.00 | Cleaning wound                          |
| Z1R2.11 | Cleansing wound                         |
| Z1R2.12 | Wound toilet                            |
| Z1R3.00 | Debridement of skin                     |
| Z1R3.11 | Debridement of wound of skin            |
| Z1R3.12 | Wound debridement                       |
| Z1R3.13 | Wound debridement                       |
| Z1R3100 | Debridement of wound with topical agent |
| Z1R3200 | Surgical debridement of wound           |
| Z1R4.00 | Removal of slough from skin             |
| Z1R4.11 | Desloughing wound                       |
| Z1R5.00 | Removal of contaminant from skin        |
| ZA13E00 | Insertion of quill in the nail bed      |
| ZA14.00 | Ablation of nail bed                    |
| ZA14.11 | Ablation of nail matrix                 |
| ZA14100 | Total ablation of nail matrix           |
| ZA14200 | Partial ablation of nail matrix         |
| ZQ37.00 | Wound assessment                        |
| ZQ38.00 | Assessment of fluid loss from wound     |
| ZQ38.11 | Assessing seepage from wound            |
| ZQ39.00 | Pressure sore assessment                |
| ZQ39.11 | Decubitus ulcer assessment              |
| ZQ39.12 | Pressure ulcer assessment               |
| ZQ39.13 | Bed sore assessment                     |
| ZQ3A.00 | Assessment of burn injuries             |
| ZQ3A.11 | Assessment of levels of burns           |
| ZR1V.00 | ASEPSIS score for wound infection       |
| Zw02D00 | [Q] Open fracture grade 1               |
| Zw02E00 | [Q] Open fracture grade 2               |
| Zw02F00 | [Q] Open fracture grade 3               |
| Zw02G00 | [Q] Open fracture grade 3A              |
| Zw02H00 | [Q] Open fracture grade 3B              |
| Zw02J00 | [Q] Open fracture grade 3C              |
| ZX14.00 | Damaging own wounds                     |
| ZX14300 | Poking fingers into wound               |
| ZX14400 | Inserting objects into wound            |
