# Supplementary material for: Cohort study evaluating the burden of wounds to the UK’s National Health Service in 2017/2018: update from 2012/2013
Source: PubMed Central journal article supplement — BMJ Open. 2020 Dec 22;10(12):e045253. doi: 10.1136/bmjopen-2020-045253 (PMC7757484; doi:10.1136/bmjopen-2020-045253), 2020-12-22
Supplement: bmjopen-2020-045253supp002.pdf [file bmjopen-2020-045253supp002.pdf]

**Table S2: Patients' baseline characteristics.**

|                                                       | Abscess | Burn | Diabetic foot ulcer | Leg ulcer (arterial) | Leg ulcer (mixed) | Leg ulcer (unspecified) | Leg ulcer (venous) | Open wound | Pressure ulcer | Surgical wound | Trauma | Unspecified | All wounds |
|-------------------------------------------------------|---------|------|---------------------|----------------------|-------------------|-------------------------|--------------------|------------|----------------|----------------|--------|-------------|------------|
| Mean age per patient (years)                          | 46.0    | 47.1 | 62.3                | 57.4                 | 67.0              | 52.6                    | 70.9               | 53.4       | 76.1           | 55.4           | 52.4   | 55.9        | 57.9       |
| Percentage male                                       | 42%     | 35%  | 51%                 | 22%                  | 57%               | 39%                     | 48%                | 40%        | 40%            | 42%            | 41%    | 49%         | 44%        |
| Percentage smoker                                     | 29%     | 24%  | 11%                 | 13%                  | 10%               | 21%                     | 7%                 | 18%        | 7%             | 19%            | 16%    | 22%         | 17%        |
| Percentage ex-smoker                                  | 19%     | 19%  | 37%                 | 32%                  | 30%               | 21%                     | 44%                | 29%        | 40%            | 29%            | 23%    | 28%         | 30%        |
| Percentage non-smoker                                 | 51%     | 56%  | 52%                 | 55%                  | 60%               | 58%                     | 48%                | 51%        | 40%            | 52%            | 59%    | 49%         | 52%        |
| Percentage with unknown smoking status                | 1%      | 1%   | 0%                  | 0%                   | 0%                | 0%                      | 1%                 | 2%         | 13%            | 0%             | 2%     | 1%          | 1%         |
| Mean body mass index per patient (kg/m <sup>2</sup> ) | 29.7    | 27.9 | 30.9                | 28.8                 | 32.3              | 27.6                    | 31.5               | 29.6       | 24.5           | 28.3           | 27.8   | 28.9        | 29.1       |
| Percentage with new wounds in the study period        | 79%     | 79%  | 61%                 | 33%                  | 50%               | 68%                     | 59%                | 87%        | 80%            | 77%            | 84%    | 80%         | 73%        |
| Percentage of all wounds with a recorded infection    | 27%     | 13%  | 78%                 | 52%                  | 47%               | 68%                     | 41%                | 94%        | 13%            | 35%            | 29%    | 1%          | 40%        |
