# Supplementary material for: Cohort study evaluating the burden of wounds to the UK’s National Health Service in 2017/2018: update from 2012/2013
Source: PubMed Central journal article supplement — BMJ Open. 2020 Dec 22;10(12):e045253. doi: 10.1136/bmjopen-2020-045253 (PMC7757484; doi:10.1136/bmjopen-2020-045253), 2020-12-22
Supplement: bmjopen-2020-045253supp003.pdf [file bmjopen-2020-045253supp003.pdf]

**Table S3: Percentage of patients with a comorbidity in the year before the start of their wound.** Those with diabetes are a subset of those with endocrinological comorbidities.

|                                          | Abscess | Burn | Diabetic foot ulcer | Leg ulcer (arterial) | Leg ulcer (mixed) | Leg ulcer (unspecified) | Leg ulcer (venous) | Open wound | Pressure ulcer | Surgical wound | Trauma | Unspecified | All wounds |
|------------------------------------------|---------|------|---------------------|----------------------|-------------------|-------------------------|--------------------|------------|----------------|----------------|--------|-------------|------------|
| Cardiovascular                           | 36%     | 35%  | 70%                 | 67%                  | 83%               | 45%                     | 78%                | 44%        | 53%            | 47%            | 38%    | 51%         | 53%        |
| Dermatological                           | 48%     | 52%  | 60%                 | 44%                  | 63%               | 50%                     | 41%                | 51%        | 40%            | 51%            | 54%    | 45%         | 49%        |
| Endocrinological                         | 52%     | 56%  | 99%                 | 78%                  | 97%               | 18%                     | 52%                | 69%        | 60%            | 63%            | 55%    | 57%         | 60%        |
| Diabetes                                 | 50%     | 52%  | 100%                | 78%                  | 97%               | 13%                     | 37%                | 67%        | 60%            | 59%            | 51%    | 52%         | 57%        |
| Gastroenterological                      | 29%     | 32%  | 42%                 | 67%                  | 33%               | 29%                     | 19%                | 34%        | 47%            | 37%            | 31%    | 35%         | 33%        |
| Genito-urinary                           | 21%     | 24%  | 28%                 | 44%                  | 33%               | 18%                     | 19%                | 25%        | 27%            | 28%            | 24%    | 24%         | 24%        |
| Immunological                            | 7%      | 11%  | 13%                 | 11%                  | 17%               | 3%                      | 11%                | 10%        | 7%             | 9%             | 8%     | 9%          | 9%         |
| Malnutrition                             | 0%      | 2%   | 2%                  | 0%                   | 0%                | 5%                      | 4%                 | 1%         | 13%            | 1%             | 2%     | 3%          | 3%         |
| Musculoskeletal                          | 41%     | 56%  | 62%                 | 67%                  | 63%               | 61%                     | 59%                | 49%        | 73%            | 57%            | 49%    | 56%         | 56%        |
| Neurological                             | 16%     | 21%  | 24%                 | 11%                  | 27%               | 24%                     | 33%                | 18%        | 67%            | 22%            | 17%    | 17%         | 24%        |
| Oncological                              | 14%     | 16%  | 25%                 | 11%                  | 20%               | 16%                     | 7%                 | 14%        | 27%            | 18%            | 15%    | 19%         | 16%        |
| Ophthalmological                         | 8%      | 15%  | 20%                 | 0%                   | 27%               | 13%                     | 4%                 | 11%        | 33%            | 13%            | 11%    | 10%         | 12%        |
| Psychiatric                              | 44%     | 40%  | 39%                 | 33%                  | 53%               | 47%                     | 15%                | 35%        | 33%            | 35%            | 32%    | 35%         | 35%        |
| Renal                                    | 8%      | 5%   | 30%                 | 22%                  | 33%               | 13%                     | 30%                | 12%        | 40%            | 14%            | 9%     | 16%         | 18%        |
| Respiratory                              | 38%     | 44%  | 45%                 | 56%                  | 43%               | 42%                     | 33%                | 36%        | 33%            | 38%            | 36%    | 37%         | 38%        |
| Mean number of comorbidities per patient | 3.7     | 4.1  | 5.7                 | 6.0                  | 5.7               | 3.9                     | 4.0                | 4.1        | 5.6            | 4.3            | 3.8    | 4.2         | 4.1        |
