# Supplementary material for: Cohort study evaluating the burden of wounds to the UK’s National Health Service in 2017/2018: update from 2012/2013
Source: PubMed Central journal article supplement — BMJ Open. 2020 Dec 22;10(12):e045253. doi: 10.1136/bmjopen-2020-045253 (PMC7757484; doi:10.1136/bmjopen-2020-045253), 2020-12-22
Supplement: bmjopen-2020-045253supp004.pdf [file bmjopen-2020-045253supp004.pdf]

**Table S4: Healing rates in the study period.**

|                                                        | Abscess | Burn | Diabetic foot ulcer | Leg ulcer (arterial) | Leg ulcer (mixed) | Leg ulcer (unspecified) | Leg ulcer (venous) | Open wound | Pressure ulcer | Surgical wound | Trauma | Unspecified | All wounds |
|--------------------------------------------------------|---------|------|---------------------|----------------------|-------------------|-------------------------|--------------------|------------|----------------|----------------|--------|-------------|------------|
| Wounds that healed in the study period                 | 86%     | 84%  | 52%                 | 47%                  | 30%               | 55%                     | 37%                | 90%        | 60%            | 85%            | 94%    | 85%         | 70%        |
| New wounds that healed in the study period             | 85%     | 80%  | 60%                 | 40%                  | 27%               | 38%                     | 56%                | 90%        | 75%            | 86%            | 94%    | 88%         | 76%        |
| Existing wounds that healed in the study period        | 89%     | 96%  | 40%                 | 50%                  | 33%               | 92%                     | 9%                 | 90%        | 0%             | 80%            | 96%    | 73%         | 56%        |
| Wounds that healed with no evidence of infection       | 92%     | 85%  | 57%                 | 50%                  | 34%               | 60%                     | 50%                | 93%        | 62%            | 87%            | 95%    | 86%         | 77%        |
| Wounds that healed with recorded evidence of infection | 69%     | 75%  | 50%                 | 45%                  | 25%               | 52%                     | 18%                | 89%        | 50%            | 81%            | 91%    | 38%         | 60%        |
| Wounds that healed among smokers                       | 84%     | 87%  | 33%                 | 37%                  | 28%               | 48%                     | 25%                | 88%        | 33%            | 82%            | 96%    | 85%         | 64%        |
| Wounds that healed among ex-smokers                    | 90%     | 75%  | 53%                 | 47%                  | 32%               | 53%                     | 39%                | 88%        | 67%            | 83%            | 95%    | 88%         | 70%        |
| Wounds that healed among non-smokers                   | 87%     | 87%  | 56%                 | 50%                  | 30%               | 58%                     | 38%                | 93%        | 75%            | 88%            | 96%    | 84%         | 74%        |
