# Supplementary material for: Cohort study evaluating the burden of wounds to the UK’s National Health Service in 2017/2018: update from 2012/2013
Source: PubMed Central journal article supplement — BMJ Open. 2020 Dec 22;10(12):e045253. doi: 10.1136/bmjopen-2020-045253 (PMC7757484; doi:10.1136/bmjopen-2020-045253), 2020-12-22
Supplement: bmjopen-2020-045253supp005.pdf [file bmjopen-2020-045253supp005.pdf]

**Table S5: Percentage of patients who utilised resources in the study year.** †Includes tissue viability nurses and diabetic nurse specialists.

|                                                         | Abscess | Burn | Diabetic foot ulcer | Leg ulcer (arterial) | Leg ulcer (mixed) | Leg ulcer (unspecified) | Leg ulcer (venous) | Open wound | Pressure ulcer | Surgical wound | Trauma | Unspecified | All wounds |
|---------------------------------------------------------|---------|------|---------------------|----------------------|-------------------|-------------------------|--------------------|------------|----------------|----------------|--------|-------------|------------|
| District/community nurse visits                         | 37%     | 52%  | 96%                 | 89%                  | 93%               | 82%                     | 85%                | 24%        | 60%            | 46%            | 15%    | 44%         | 38%        |
| Healthcare assistant visits                             | 32%     | 27%  | 93%                 | 89%                  | 99%               | 84%                     | 81%                | 21%        | 40%            | 46%            | 15%    | 44%         | 36%        |
| Practice nurse visits                                   | 96%     | 94%  | 94%                 | 100%                 | 100%              | 79%                     | 96%                | 97%        | 93%            | 97%            | 98%    | 98%         | 97%        |
| GP office visits                                        | 94%     | 79%  | 97%                 | 100%                 | 100%              | 100%                    | 100%               | 90%        | 93%            | 82%            | 93%    | 62%         | 84%        |
| Dressings                                               | 100%    | 100% | 100%                | 100%                 | 100%              | 100%                    | 100%               | 100%       | 100%           | 100%           | 100%   | 100%        | 100%       |
| Compression bandaging/hosiery                           | 2%      | 5%   | 15%                 | 0%                   | 100%              | 26%                     | 93%                | 5%         | 0%             | 3%             | 0%     | 6%          | 6%         |
| Prescribed analgesics/non-steroidal anti-inflammatories | 22%     | 19%  | 57%                 | 67%                  | 87%               | 32%                     | 81%                | 12%        | 53%            | 24%            | 10%    | 20%         | 21%        |
| Prescribed antibiotics                                  | 82%     | 42%  | 92%                 | 97%                  | 90%               | 84%                     | 81%                | 81%        | 67%            | 43%            | 37%    | 26%         | 50%        |
| Hospital outpatient visits with a nurse                 | 11%     | 32%  | 35%                 | 22%                  | 33%               | 16%                     | 37%                | 8%         | 0%             | 18%            | 5%     | 31%         | 17%        |
| Accident & emergency attendances                        | 16%     | 18%  | 23%                 | 22%                  | 27%               | 5%                      | 30%                | 8%         | 7%             | 8%             | 5%     | 4%          | 8%         |
| Hospital admissions without surgery                     | 7%      | 8%   | 4%                  | 0%                   | 3%                | 5%                      | 7%                 | 7%         | 13%            | 8%             | 5%     | 8%          | 7%         |
| Hospital outpatient visits with a physician/surgeon     | 4%      | 0%   | 15%                 | 22%                  | 7%                | 8%                      | 7%                 | 4%         | 20%            | 8%             | 7%     | 1%          | 5%         |
| GP home visits                                          | 2%      | 3%   | 2%                  | 0%                   | 10%               | 0%                      | 11%                | 1%         | 13%            | 2%             | 1%     | 1%          | 2%         |
| Diagnostic tests                                        | 1%      | 2%   | 3%                  | 0%                   | 10%               | 3%                      | 0%                 | 1%         | 0%             | 2%             | 1%     | 3%          | 2%         |
| Ambulance services                                      | 1%      | 0%   | 3%                  | 0%                   | 3%                | 0%                      | 4%                 | 0%         | 0%             | 1%             | 0%     | 1%          | 1%         |
| Hospital admissions with surgery                        | 2%      | 2%   | 2%                  | 0%                   | 0%                | 0%                      | 0%                 | 0%         | 0%             | 6%             | 1%     | 0%          | 2%         |
| Specialist nurse visits†                                | 0%      | 0%   | 3%                  | 0%                   | 10%               | 0%                      | 0%                 | 0%         | 7%             | 1%             | 0%     | 1%          | 1%         |
| Podiatrist visits                                       | 1%      | 0%   | 3%                  | 33%                  | 17%               | 0%                      | 0%                 | 1%         | 7%             | 1%             | <1%    | 0%          | 1%         |
| Day Cases                                               | 1%      | 0%   | 0%                  | 0%                   | 0%                | 0%                      | 0%                 | 0%         | 0%             | 1%             | 0%     | <1%         | <1%        |
